# Supplementary material for: Nitroalkanes as Thioacyl Equivalents to Access Thioamides and Thiopeptides
Source: Research Square preprint supplement (doi:10.21203/rs.3.rs-2599588/v1), 2023-03-01

Supporting Information  
©Nature Publishing Group

**Nitroalkanes as Thioacyl Equivalents to Access Thioamides and Thiopeptides**

Xiaonan Wang<sup>1</sup>, Silong Xu<sup>1</sup>, Yuhai Tang<sup>1</sup>, Martin J. Lear<sup>2</sup>, Wangxiao He<sup>3</sup> and Jing Li<sup>1\*</sup>

<sup>1</sup>School of Chemistry, and Xi'an Key Laboratory of Sustainable Energy Materials Chemistry, Xi'an Jiaotong University, Xi'an 710049, P. R. China

<sup>2</sup>School of Chemistry, University of Lincoln, Brayford Pool, Lincoln LN6 7TS, United Kingdom

<sup>3</sup>The Second Affiliated Hospital of Xi'an Jiao Tong University  
Xi'an 710061, China

\*Correspondence to: [jingli@xjtu.edu.cn](mailto:jingli@xjtu.edu.cn)

### Contents

|                                                                                                        |    |
|--------------------------------------------------------------------------------------------------------|----|
| 1. General Information.....                                                                            | 3  |
| 2. Synthesis of Starting Materials. ....                                                               | 3  |
| General procedure to prepare peptide nitroalkanes. ....                                                | 8  |
| 3. General procedure and characterization of thioamide products .....                                  | 11 |
| 3.1 Optimization of reaction conditions .....                                                          | 11 |
| 3.2 General thioamidation procedure between nitro compounds and amines. ....                           | 11 |
| 3.2.1 Structural Characterization of thioamide products .....                                          | 12 |
| 3.2.2 General synthesis of thiopeptides from chiral nitro compounds and chiral amino acid esters. .... | 30 |
| 4. Mechanistic experiments .....                                                                       | 59 |
| 5. References.....                                                                                     | 74 |
| 6. NMR spectra .....                                                                                   | 76 |

## SUPPORTING INFORMATION

---

### 1. General Information

Unless otherwise stated, all reagents were used as received from commercial suppliers. Reaction progress was monitored by thin layer chromatography (TLC) performed on aluminum plates coated with silica gel F<sub>254</sub> with 0.2 mm thickness. Chromatograms were visualized by fluorescence quenching with UV light at 254 nm or by staining using potassium permanganate. 1-Nitropropane was purchased from energy-chemical Co. Flash column chromatography was performed using silica gel (200-300 mesh, Merck and Co.). Neat infra-red spectra were recorded using a Perkin-Elmer Spectrum 100 FT-IR spectrometer. Wavenumbers ( $\nu_{\text{max}}$ ) are reported in  $\text{cm}^{-1}$ . Mass spectra were obtained using a Finnigan MAT 8200 or (70 eV) or an Agilent 5973 (70 eV) spectrometer, using electrospray ionization (ESI). All  $^1\text{H}$  NMR and  $^{13}\text{C}$  NMR spectra were recorded using a JEOL JNM AL 400 (400 MHz) at 300K. Chemical shifts are given in parts per million (ppm,  $\delta$ ), referenced to the solvent peak of  $\text{CDCl}_3$ , defined at  $\delta = 7.26$  ppm ( $^1\text{H}$  NMR) and  $\delta = 77.16$  ( $^{13}\text{C}$  NMR). Coupling constants are quoted in Hz ( $J$ ).  $^1\text{H}$  NMR splitting patterns were designated as singlet (*s*), doublet (*d*), triplet (*t*), quartet (*q*), pentet (*p*). Splitting patterns that could not be interpreted or adequately resolved are designated as multiplet (*m*) or broad (*br*). All the absorption spectra were measured using a Perkin Elmer Lambda 25 UV/Vis Spectrophotometer.

### 2. Synthesis of Starting Materials.

#### 2.1 Synthesis of Electrophilic S-sources:

The S source **3a**, **3b**, **3c** were prepared according to a reported procedure.<sup>[1]</sup>

The S source **3d** was prepared in 87% yield (5 mmol) from isopropol and sulfur chloride according to a reported procedure.<sup>[2]</sup>

## SUPPORTING INFORMATION

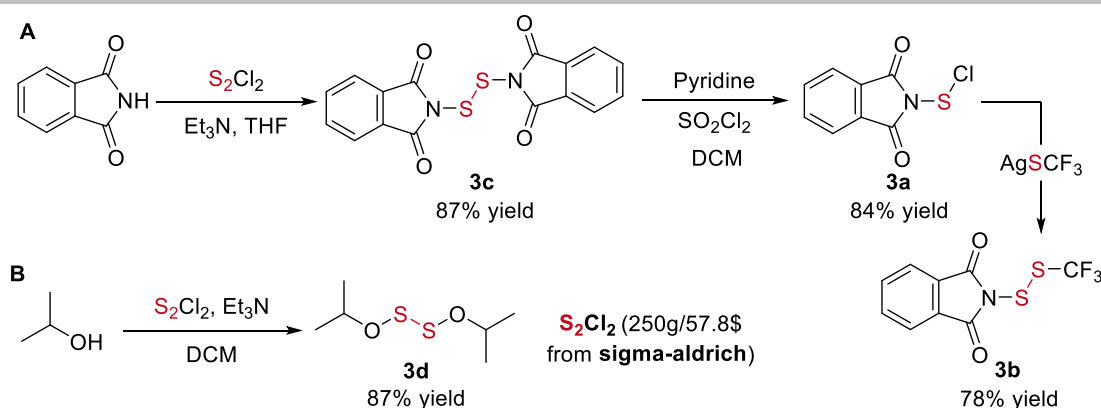

**Figure S1** Preparation of electrophilic S-sources **3a–3d**

### 2.2 Synthesis of nitro compounds:

#### (4-Nitrobutyl)benzene (1a)

The nitro compound **1a** was prepared in 51% yield (5 mmol) from 3-phenylpropanal in two steps according to a reported procedure.<sup>[3]</sup> Spectral data was consistent with literature reported<sup>[3]</sup>.

#### (2-Nitroethyl)benzene (1b)

The nitro compound was prepared in 92% yield (2.5 mmol) according to a reported procedure.<sup>[4]</sup>

#### Methyl 4-nitrobutanoate (1c)

The nitro compound (**1c**) was prepared in 64% yield (4.2 mmol) according to a reported procedure.<sup>[5]</sup>

#### 2-(2-Nitroethyl)-1,3-dioxolane (1d)

The nitro compound was prepared in 76% yield (5 mmol) from 3-nitropropanal in one step according to a reported procedure.<sup>[6]</sup>

#### 3-Nitropropan-1-ol (1e)

The nitro compound was prepared in 70% yield (3 mmol) from acrylaldehyde in two steps according to a reported procedure.<sup>[3]</sup>



## SUPPORTING INFORMATION

---

### **(Nitromethyl)benzene (1f)**

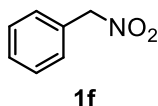

The nitro compound was prepared in 89% yield (3.6 mmol) according to a reported procedure.<sup>[7]</sup>

### **1-Chloro-5-nitropentane (1g)**

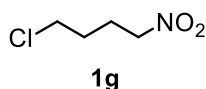

The nitro compound was prepared in 70% yield (5 mmol) according to a reported procedure.<sup>[8]</sup>

### **(1-Nitropropan-2-yl)benzene (1h)**

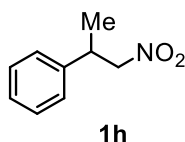

The nitro compound was prepared in 92% yield (5 mmol) according to a reported procedure.<sup>[9]</sup>

### **(1,1,1-Trifluoro-3-nitropropan-2-yl)benzene (1i)**

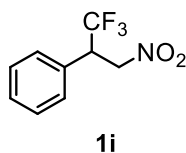

The nitro compound was prepared in 71% yield (2.3 mmol) from (*E*)-(3,3,3-trifluoro-1-nitroprop-1-en-2-yl)benzene in one step according to a reported procedure.<sup>[10]</sup>

### **Benzyl (2-nitro-1-phenylethyl)carbamate (1j)**

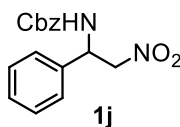

The nitro compound was prepared in 70% yield (5 mmol) according to a reported procedure.<sup>[11]</sup>

### **N-(2-nitro-1-phenylethyl)acetamide (1k)**

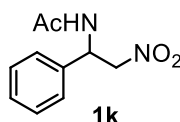

The nitro compound was prepared in 51% yield (5 mmol) according to a reported procedure.<sup>[12]</sup>

### **1-Iodo-4-(nitromethyl)benzene (1l)**

## SUPPORTING INFORMATION

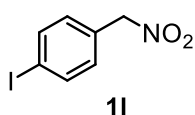

The nitro compound was prepared in 53% yield (5 mmol) from 1-Iodo-4-(iodomethyl)benzene in one step according to a reported procedure.<sup>[14]</sup>

<sup>1</sup>H NMR (101 MHz, CDCl<sub>3</sub>) δ 7.78 (d, *J* = 8.3 Hz, 2H), 7.19 (d, *J* = 8.3 Hz, 2H), 5.37 (s, 2H).

<sup>13</sup>C NMR (101 MHz, CDCl<sub>3</sub>) δ 138.4, 131.8, 129.2, 96.5, 79.5.

### 4-(2-Nitroethyl)phenol (1m)

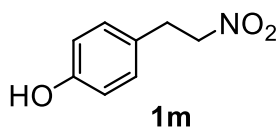

The nitro compound was prepared in 79% yield (5 mmol) from 3-phenylpropanal in two steps according to a reported procedure.<sup>[15]</sup>

### *tert*-Butyl (*R*)-(1-nitro-4-phenylbutan-2-yl)carbamate (7a)

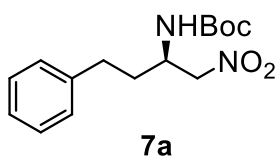

The nitro compound was prepared in 95% yield (5 mmol) from 3-phenylpropanal through two steps according to a reported procedure,<sup>[11]</sup> and used after recrystallization (PE/EA=20:1).

The ee value of the chiral nitro compound was determined by HPLC using a chiral stationary phase, ee = 99% (Chiralpak AD-H, hexane/*i*-PrOH = 95:5, 254 nm, 0.75 mL/min, *t*<sub>major</sub> = 19.6 min, *t*<sub>minor</sub> = 21.8 min).

### *tert*-Butyl (*R*)-(3-methyl-1-nitrobutan-2-yl)carbamate (7b)

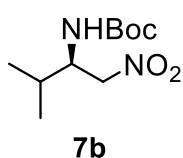

The nitro compound was prepared in 92% yield (5 mmol) from isobutyraldehyde through two steps according to a reported procedure.<sup>[11]</sup> and used after recrystallization (PE/EA=20:1). The ee

value of the chiral nitro compound was determined by HPLC using a chiral stationary phase, ee > 99% (Chiralpak AD-H, hexane/*i*-PrOH = 90:10, 254 nm, 0.75 mL/min, *t*<sub>major</sub> = 9.1 min, *t*<sub>minor</sub> = 13.0 min).

### *tert*-Butyl (*R*)-(1-cyclohexyl-2-nitroethyl)carbamate (7c)

## SUPPORTING INFORMATION

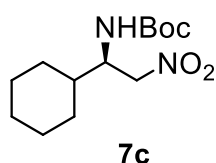

The nitro compound was prepared in 81% yield (5 mmol) from cyclohexanecarbaldehyde through two steps according to a reported procedure.<sup>[11]</sup> and used after recrystallization (PE/EA=20:1). The ee value of the chiral nitro compound was determined by HPLC using a chiral stationary phase, ee > 99% (Chiralpak AD-H, hexane/*i*-PrOH = 90:10, 254 nm, 1 mL/min,  $t_{\text{major}}$  = 7.5 min,  $t_{\text{minor}}$  = 9.5 min).

### tert-Butyl (R)-(4-methyl-1-nitropentan-2-yl)carbamate (7d)

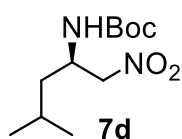

The nitro compound was prepared in 85% yield (5 mmol) from 3-methylbutanal through two steps according to a reported procedure.<sup>[16]</sup> and used after recrystallization (PE/EA=20:1). The ee value of the chiral nitro compound was determined by HPLC using a chiral stationary phase, ee > 99% (Chiralpak AD-H, hexane/*i*-PrOH = 90:10, 254 nm, 0.8 mL/min,  $t_{\text{major}}$  = 8.1 min,  $t_{\text{minor}}$  = 9.5 min).

### tert-Butyl (R)-(1-nitro-3-phenylpropan-2-yl)carbamate (7e)

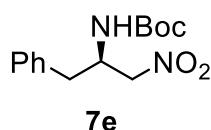

The nitro compound was prepared in 70% yield (5 mmol) from 2-phenylacetaldehyde through two steps according to a reported procedure.<sup>[16]</sup> and used after recrystallization (PE/EA=20:1). The ee value of the chiral nitro compound was determined by HPLC using a chiral stationary phase, ee > 99% (Chiralpak AD-H, hexane/*i*-PrOH = 90:10, 254 nm, 1 mL/min,  $t_{\text{major}}$  = 8.5 min,  $t_{\text{minor}}$  = 10.7 min).

### tert-Butyl (R)-(2-nitro-1-phenylethyl)carbamate (7f)

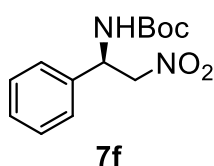

The nitro compound was prepared in 91% yield (5 mmol) from benzaldehyde through two steps according to a reported procedure.<sup>[11]</sup> and used after recrystallization (PE/EA=20:1). The ee value of the chiral nitro compound was determined by HPLC using

## SUPPORTING INFORMATION

a chiral stationary phase, ee > 99% (Chiralpak AD-H, hexane/*i*-PrOH = 95:5, 254 nm, 0.75 mL/min,  $t_{\text{major}}$  = 51.6 min,  $t_{\text{minor}}$  = 44.9 min).

### **(R)-1-nitro-4-phenylbutan-2-amine hydrochloride (7g)**<sup>[17]</sup>

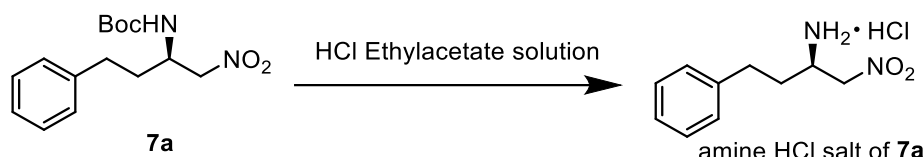

The deprotected amine salt of **7a** was prepared by addition of HCl in ethylacetate, and was used directly for the next step of the reaction.

### **General procedure to prepare peptide nitroalkanes.**

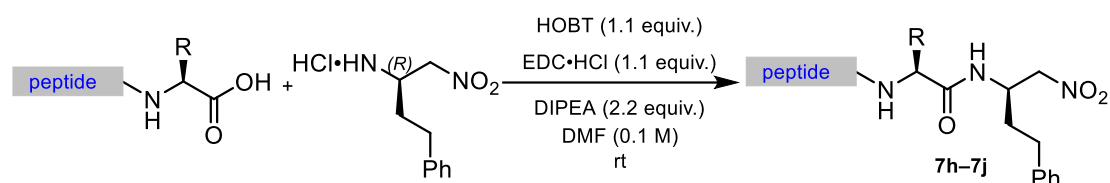

**General procedure:** *N*-BOC protected amino acid (1 equiv.) and **7g** (1 equiv.) were added to a 50 mL round bottom flask, followed by adding DMF (10 mL). After stirring for 10 minutes in an ice bath, HOBT (1.1 equiv.) and EDC (1.1 equiv.) were added. The reaction was further stirred in an ice bath for 10 minutes, then the DIPEA (2.2 equiv.) was added. The reaction continues to stir in an ice bath for 30 min before rising to room temperature and stirring overnight, quenched with H<sub>2</sub>O, extracted with ethyl acetate and the organic phase was collected. The organic phase was extracted with 1M HCl, *sat.* NaHCO<sub>3</sub> solution, *sat.* NaCl solution, dried over anhydrous MgSO<sub>4</sub>. After filtration, the solution was concentrated under reduced pressure and the crude residue was purified by flash-column chromatography (PE/EA = Petroleum ether/Ethyl acetate).

### **tert-Butyl ((S)-1-(((R)-1-nitro-4-phenylbutan-2-yl)amino)-1-oxo-3-phenylpropan-2-yl)carbamate (7h)**

## SUPPORTING INFORMATION

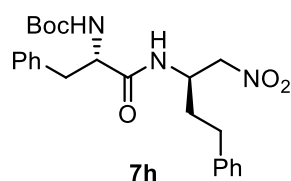

Following general procedure: **7h** was isolated as a White solid in 74 yield (980 mg; 3 mmol) which was purified by silica gel chromatography (DCM: MeOH = 20:1~10:1,  $R_f$  = 0.45 (DCM: MeOH = 10:1).

**$^1\text{H}$  NMR** (400 MHz,  $\text{CDCl}_3$ )  $\delta$  7.29 (q,  $J$  = 7.0 Hz, 4H), 7.21 (q,  $J$  = 8.1 Hz, 4H), 7.09 (d,  $J$  = 7.4 Hz, 2H), 6.51 (d,  $J$  = 8.5 Hz, 1H), 5.05 (d,  $J$  = 7.7 Hz, 1H), 4.47 (d,  $J$  = 4.7 Hz, 1H), 4.34 (q,  $J$  = 7.4 Hz, 2H), 3.12 – 3.00 (m, 2H), 2.52 (t,  $J$  = 9.6 Hz, 2H), 1.80 (q,  $J$  = 7.4 Hz, 2H), 1.41 (s, 9H).

**$^{13}\text{C}$  NMR** (101 MHz,  $\text{CDCl}_3$ )  $\delta$  166.9, 150.9, 135.5, 131.8, 124.7, 124.5, 124.1, 123.9, 123.7, 122.5, 121.7, 75.9, 51.4, 42.6, 33.2, 31.8, 28.3, 27.2, 23.6.

**HRMS** (ESI): calculated for  $\text{C}_{24}\text{H}_{31}\text{N}_3\text{O}_5\text{Na}$   $[\text{M}+\text{Na}]^+$  464.2156; found: 464.2160.

**FT-IR** (neat): 3304, 2926, 2859, 1687, 1658, 1548, 1495, 1452, 1379, 1082, 1032, 912, 699  $\text{cm}^{-1}$ .

### **Benzyl tert-butyl ((S)-6-(((S)-1-(((R)-1-nitro-4-phenylbutan-2-yl)amino)-1-oxopropan-2-yl)amino)-6-oxohexane-1,5-diyl)dicarbamate (7i)**

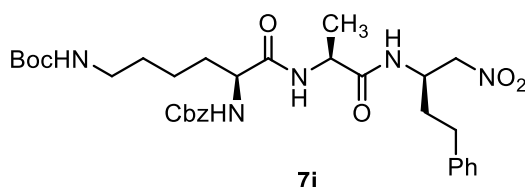

Following general procedure: **7i** was isolated as a yellow solid in 69% yield (866 mg; 2 mmol) which was purified by silica gel chromatography (DCM: MeOH = 20:1~10:1,  $R_f$  = 0.40 (DCM: MeOH = 10:1).

**$^1\text{H}$  NMR** (400 MHz,  $\text{CDCl}_3$ )  $\delta$  7.42 – 7.07 (m, 11H), 6.65 (s, 1H), 6.33 (s, 1H), 5.19 – 4.97 (m, 2H), 4.78 (s, 1H), 4.62 – 4.26 (m, 4H), 4.04 (s, 1H), 3.10 (d,  $J$  = 28.6 Hz, 2H), 2.91 – 2.51 (m, 2H), 2.11 – 1.63 (m, 4H), 1.40 (dd,  $J$  = 16.8, 10.2 Hz, 15H).

**$^{13}\text{C}$  NMR** (101 MHz,  $\text{CDCl}_3$ )  $\delta$  172.6, 172.2, 157.6, 157.1, 140.8, 140.4, 136.3, 135.9, 128.7, 128.6, 128.5, 126.2, 79.7, 78.2, 67.7, 56.5, 49.3, 47.7, 38.8, 33.2, 32.1, 30.6, 30.0, 28.5, 22.2, 17.7.

**HRMS** (ESI): calculated for  $\text{C}_{32}\text{H}_{45}\text{N}_5\text{O}_8\text{Na}$   $[\text{M}+\text{Na}]^+$  650.3160; found: 650.3182.

## SUPPORTING INFORMATION

**FT-IR** (neat): 3355, 3292, 3055, 3029, 2982, 2934, 2863, 1681, 1649, 1530, 1454, 1394, 1366, 1168, 1093, 1040, 912, 696  $\text{cm}^{-1}$ .

**tert-Butyl (2-(((R)-2-(((R)-1-nitro-4-phenylbutan-2-yl)carbamoyl)pyrrolidin-1-yl)-2-oxoethyl)carbamate (7j)**

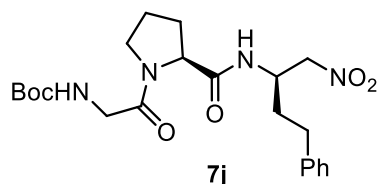

Following general procedure: **7j** was isolated as a yellow solid in 76% yield (682 mg; 2.0 mmol) which was purified by silica gel chromatography (DCM: MeOH = 20:1~10:1,  $R_f$  = 0.40 (DCM: MeOH = 10:1).

**$^1\text{H}$  NMR** (400 MHz,  $\text{CDCl}_3$ )  $\delta$  7.38 – 7.27 (m, 3H), 7.23 – 7.16 (m, 3H), 5.36 (s, 1H), 4.64 – 4.51 (m, 2H), 4.48 – 4.35 (m, 2H), 4.07 – 3.83 (m, 2H), 3.55 (td,  $J$  = 9.1, 3.2 Hz, 1H), 3.40 (td,  $J$  = 9.6, 7.4 Hz, 1H), 2.80 – 2.63 (m, 2H), 2.47 – 2.39 (m, 1H), 2.16 – 2.05 (m, 1H), 2.01 (ddd,  $J$  = 11.5, 6.5, 2.3 Hz, 1H), 1.97 – 1.79 (m, 3H), 1.45 (s, 9H).

**$^{13}\text{C}$  NMR** (101 MHz,  $\text{CDCl}_3$ )  $\delta$  171.1, 169.5, 140.4, 128.7, 128.5, 126.4, 80.0, 78.1, 60.1, 47.7, 46.3, 43.3, 33.4, 32.1, 28.4, 26.9, 24.9.

**HRMS** (ESI): calculated for  $\text{C}_{22}\text{H}_{32}\text{N}_4\text{O}_6\text{Na}$   $[\text{M}+\text{Na}]^+$  471.2214; found: 471.2228.

**FT-IR** (neat): 3323, 1712, 1652, 1552, 1453, 1437, 1366, 1164, 1049, 1032, 915, 702  $\text{cm}^{-1}$ .

**tert-Butyl (3-nitropropyl)carbamate (12)**

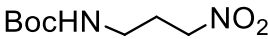 **12** The nitro compound was prepared in 48% yield (20 mmol) in one step according to a reported procedure.<sup>[18]</sup>

**1-Methoxy-4-(nitromethyl)benzene (15)**

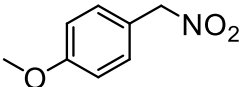 **15** The nitro compound was prepared in 58% yield (5 mmol) according to a reported procedure.<sup>[19]</sup>

## SUPPORTING INFORMATION

### 3. General procedure and characterization of thioamide products

#### 3.1 Optimization of reaction conditions

**Table S1.** Details on the Optimization of Thioamidation Reaction Conditions<sup>a</sup>

$\text{Ph-CH}_2\text{-CH}_2\text{-NO}_2$  (**1a**) +  $\text{H}_2\text{N-CH}_2\text{-CH}_2\text{-Ph}$  (**2a**)  $\xrightarrow[\text{base, solvent; rt}]{\text{S}_8 \text{ (2 equiv.)}}$   $\text{Ph-CH}_2\text{-CH}_2\text{-C(=S)-NH-CH}_2\text{-CH}_2\text{-Ph}$  (**4a**)

| entry           | solvent            | base                            | yield (%) <sup>b</sup> |
|-----------------|--------------------|---------------------------------|------------------------|
| 1               | THF                | -                               | 12                     |
| 2               | CH <sub>3</sub> CN | K <sub>2</sub> CO <sub>3</sub>  | 21                     |
| 3               | DMSO               | K <sub>2</sub> CO <sub>3</sub>  | 25                     |
| 4               | DCE                | K <sub>2</sub> CO <sub>3</sub>  | 16                     |
| 5               | 1,4-dioxane        | K <sub>2</sub> CO <sub>3</sub>  | 23                     |
| 6               | acetone            | K <sub>2</sub> CO <sub>3</sub>  | trace                  |
| 7               | DMF                | K <sub>2</sub> CO <sub>3</sub>  | 31                     |
| 8               | THF                | K <sub>2</sub> CO <sub>3</sub>  | 37                     |
| 9               | THF                | KHCO <sub>3</sub>               | 30                     |
| 10              | THF                | Na <sub>2</sub> CO <sub>3</sub> | 24                     |
| 11              | THF                | LiOH·H <sub>2</sub> O           | 32                     |
| 12              | THF                | Cs <sub>2</sub> CO <sub>3</sub> | 28                     |
| 13              | THF                | Na <sub>2</sub> S               | 98                     |
| 14              | THF                | Et <sub>3</sub> N               | 16                     |
| 15              | THF                | DBU                             | trace                  |
| 16              | THF                | pyridine                        | trace                  |
| 17              | THF                | DIPEA                           | 15                     |
| 18 <sup>c</sup> | THF                | Na <sub>2</sub> S               | 78                     |

<sup>a</sup>Unless noted otherwise, reactions were carried out with 0.2 mmol of **1a**, 0.4 mmol of **2a**, 0.4 mmol of S<sub>8</sub> and 0.4 mmol of base in 2 ml of solvent until **1a** was consumed monitored with TLC (typically complete for 24h). <sup>b</sup>Yield of isolated product. <sup>c</sup>S<sub>8</sub> (1.25 equiv.) was used.

#### 3.2 General thioamidation procedure between nitro compounds and amines.

**General procedure A:** The reaction was no special precautions from air or water. Nitro compound **1** (0.2 mmol) was added to a 10 mL reaction tube, followed by adding THF (2 mL). then S<sub>8</sub> (2.0 equiv.), Na<sub>2</sub>S (2 equiv.) and the amine **2** (2.0 equiv.) were added.

## SUPPORTING INFORMATION

The reaction was monitored by TLC until the nitroalkane was consumed, typically complete for 24h, quenched with *sat.*  $\text{NH}_4\text{Cl}$ , extracted with ethyl acetate, and the organic phase was collected and dried over anhydrous  $\text{Na}_2\text{SO}_4$ . After filtration, the solution was concentrated under reduced pressure and the crude residue was purified by flash-column chromatography (PE/EA = Petroleum ether/Ethyl acetate).

### 3.2.1 Structural Characterization of thioamide products

#### 4-Phenyl-*N*-(3-phenylpropyl)butanethioamide (4a)

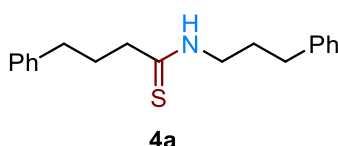

Following procedure A: **4a** was isolated as a yellow oil in 98% yield (58.2 mg; 0.196 mmol) which was purified by silica gel chromatography (PE:EA = 20:1~5:1,  $R_f$  = 0.45 (PE:EA = 5:1)).

**$^1\text{H}$  NMR** (400 MHz,  $\text{CDCl}_3$ )  $\delta$  7.29 – 7.24 (m, 4H), 7.19 – 7.13 (m, 6H), 3.69 – 3.62 (m, 2H), 2.64 (dt,  $J$  = 23.3, 7.5 Hz, 4H), 2.55 – 2.49 (m, 2H), 2.08 – 1.91 (m, 4H).

**$^{13}\text{C}$  NMR** (101 MHz,  $\text{CDCl}_3$ )  $\delta$  205.0, 141.5, 141.2, 128.7, 128.6, 128.6, 128.5, 126.4, 126.2, 46.3, 45.9, 35.0, 33.6, 30.8, 29.5.

**HRMS** (ESI): calculated for  $\text{C}_{19}\text{H}_{24}\text{NS}$   $[\text{M}+\text{H}]^+$  298.1624; found: 298.1619.

**FT-IR** (neat): 3237, 2929, 2857, 1530, 1495, 1453, 1406, 1337, 1123, 1084, 1031, 909, 699  $\text{cm}^{-1}$ .

#### *N*-Benzyl-4-phenylbutanethioamide (4b)

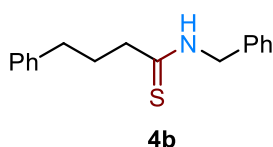

Following procedure A: **4b** was isolated as yellow oil in 98% yield (52.7 mg; 0.196 mmol) which was purified by silica gel chromatography (PE:EA = 20:1~5:1,  $R_f$  = 0.45 (PE:EA = 5:1)).



## SUPPORTING INFORMATION

**<sup>1</sup>H NMR** (400 MHz, CDCl<sub>3</sub>) δ 7.35 – 7.20 (m, 8H), 7.17 – 7.10 (m, 3H), 4.77 (d, *J* = 5.2 Hz, 2H), 2.62 (q, *J* = 7.9 Hz, 4H), 2.16 – 2.05 (m, 2H).

**<sup>13</sup>C NMR** (101 MHz, CDCl<sub>3</sub>) δ 205.2, 141.4, 136.3, 129.1, 128.6, 128.6, 128.5, 128.3, 126.2, 50.3, 46.2, 34.9, 30.9

**HRMS** (ESI): calculated for C<sub>17</sub>H<sub>20</sub>NS [M+H]<sup>+</sup> 270.1311; found: 270.1301.

**FT-IR** (neat): 3221, 3025, 1528, 1495, 1453, 1405, 1340, 1125, 947, 698 cm<sup>-1</sup>.

### **N-(4-Hydroxybutyl)-4-phenylbutanethioamide (4c)**

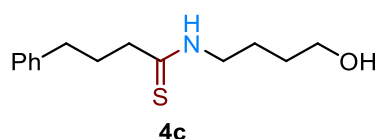

Following procedure A: **4c** was isolated as yellow oil in 88% yield (44.2 mg; 0.176 mmol) which was purified by silica gel chromatography (PE:EA = 5:1~1:1, *R<sub>f</sub>* = 0.2 (PE:EA = 1:1)).

**<sup>1</sup>H NMR** (400 MHz, CDCl<sub>3</sub>) δ 8.07 (s, 1H), 7.30 – 7.24 (m, 2H), 7.21 – 7.13 (m, 3H), 3.63 (dt, *J* = 8.3, 6.6 Hz, 4H), 2.63 (dt, *J* = 9.4, 7.8 Hz, 4H), 2.10 (ddd, *J* = 7.8, 6.6, 1.5 Hz, 2H), 1.73 (p, *J* = 7.0 Hz, 2H), 1.60 (p, *J* = 6.4 Hz, 2H).

**<sup>13</sup>C NMR** (101 MHz, CDCl<sub>3</sub>) δ 204.8, 141.5, 128.6, 128.5, 126.1, 62.1, 46.1, 45.9, 34.9, 30.8, 29.7, 24.6.

**HRMS** (ESI): calculated for C<sub>14</sub>H<sub>22</sub>NOS [M+H]<sup>+</sup> 252.1417; found: 252.1411.

**FT-IR** (neat): 3241, 3024, 2934, 2860, 1541, 1495, 1453, 1410, 1346, 1126, 1069, 1028, 909, 700 cm<sup>-1</sup>.

### **N-Allyl-4-phenylbutanethioamide (4d)**

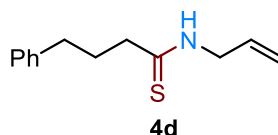

Following procedure A: **4d** was isolated as a yellow oil in 88% yield (38.5 mg; 0.176 mmol) which was purified by silica gel chromatography (PE:EA = 20:1~5:1, *R<sub>f</sub>* = 0.45 (PE:EA = 5:1)).

## SUPPORTING INFORMATION

**$^1\text{H}$  NMR** (400 MHz,  $\text{CDCl}_3$ )  $\delta$  7.27 (dd,  $J = 8.3, 6.3$  Hz, 2H), 7.21 – 7.13 (m, 3H), 5.94 – 5.81 (m, 1H), 5.28 – 5.19 (m, 2H), 4.29 – 4.24 (m, 2H), 2.69 – 2.61 (m, 4H), 2.12 (tt,  $J = 8.9, 6.8$  Hz, 2H).

**$^{13}\text{C}$  NMR** (101 MHz,  $\text{CDCl}_3$ )  $\delta$  205.4, 141.4, 131.9, 128.6, 126.2, 118.7 (2C), 48.5, 46.2, 34.9, 30.9.

**HRMS** (ESI): calculated for  $\text{C}_{13}\text{H}_{18}\text{NS}$   $[\text{M}+\text{H}]^+$  220.1155; found: 220.1143.

**FT-IR** (neat): 3237, 3024, 3006, 2987, 2924, 2861, 1646, 1527, 1496, 1453, 1398, 1317, 1180, 1124, 924, 700  $\text{cm}^{-1}$ .

### ***N*-Cyclohexyl-4-phenylbutanethioamide (4e)**

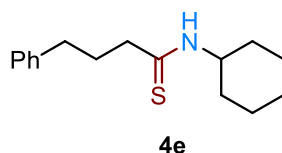

Following procedure A: **4e** was isolated as a yellow oil in 97% yield (50.6 mg; 0.194 mmol) which was purified by silica gel chromatography (PE:EA = 20:1~5:1,  $R_f = 0.5$  (PE:EA = 5:1)).

**$^1\text{H}$  NMR** (400 MHz,  $\text{CDCl}_3$ )  $\delta$  7.30 – 7.24 (m, 2H), 7.20 – 7.15 (m, 3H), 4.43 – 4.31 (m, 1H), 2.62 (dt,  $J = 22.4, 7.6$  Hz, 4H), 2.16 – 2.01 (m, 4H), 1.69 (ddt,  $J = 32.5, 12.9, 3.7$  Hz, 3H), 1.45 – 1.33 (m, 2H), 1.26 – 1.13 (m, 3H).

**$^{13}\text{C}$  NMR** (101 MHz,  $\text{CDCl}_3$ )  $\delta$  203.3, 141.5, 128.6, 128.5, 126.1, 54.3, 46.6, 34.8, 31.7, 30.8, 25.5, 24.8.

**HRMS** (ESI): calculated for  $\text{C}_{16}\text{H}_{24}\text{NS}$   $[\text{M}+\text{H}]^+$  262.1624; found: 262.1613.

**FT-IR** (neat): 3237, 3025, 2929, 2853, 1529, 1495, 1451, 1410, 1347, 1117, 1089, 1028, 892, 699  $\text{cm}^{-1}$ .

### **1-Morpholino-4-phenylbutane-1-thione (4f)**

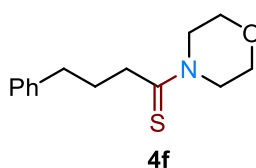

## SUPPORTING INFORMATION

Following procedure A: **4f** was isolated as a yellow oil in 93% yield (46.3 mg; 0.186 mmol) which was purified by silica gel chromatography (PE:EA = 20:1~5:1,  $R_f$  = 0.3 (PE:EA = 5:1)).

**$^1\text{H}$  NMR** (400 MHz,  $\text{CDCl}_3$ )  $\delta$  7.32 – 7.27 (m, 2H), 7.20 (td,  $J$  = 7.3, 1.3 Hz, 3H), 4.34 – 4.30 (m, 2H), 3.78 – 3.73 (m, 2H), 3.65 (dd,  $J$  = 5.7, 3.6 Hz, 2H), 3.57 (dd,  $J$  = 5.7, 3.7 Hz, 2H), 2.90 – 2.81 (m, 2H), 2.72 (t,  $J$  = 7.4 Hz, 2H), 2.09 – 1.99 (m, 2H).

**$^{13}\text{C}$  NMR** (101 MHz,  $\text{CDCl}_3$ )  $\delta$  203.4, 141.2, 128.5, 128.5, 126.2, 66.5, 66.5, 50.0, 49.9, 42.6, 35.3, 30.7.

**HRMS** (ESI): calculated for  $\text{C}_{14}\text{H}_{20}\text{NOS}$   $[\text{M}+\text{H}]^+$  250.1260; found: 250.1242.

**FT-IR** (neat): 2963, 2917, 2852, 1485, 1432, 1112, 1004, 921, 699  $\text{cm}^{-1}$ .

### ***N*-Benzyl-*N*-methyl-4-phenylbutanethioamide (4g)**

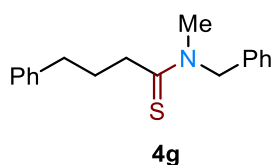

Following procedure A: **4g** was isolated as a yellow oil in 88% yield (49.8 mg; 0.176 mmol) which was purified by silica gel chromatography as a NMR observable rotamers of two thioamide forms A and B on the NMR time scale. (PE:EA = 20:1~5:1,  $R_f$  = 0.4 (PE:EA = 5:1)).

**$^1\text{H}$  NMR** (400 MHz,  $\text{CDCl}_3$ )  $\delta$  7.39 – 7.09 (m, 11H, A+B), 7.05 – 7.00 (m, 1H), 5.32 (s, 1H, B), 4.69 (s, 1H, A), 3.43 (s, 1H, B), 3.04 (s, 2H, A), 2.88 – 2.81 (m, 2H), 2.75 (t,  $J$  = 7.5 Hz, 1H), 2.67 (t,  $J$  = 7.5 Hz, 1H), 2.14 (dddd,  $J$  = 10.1, 7.5, 5.9, 3.7 Hz, 2H).

**$^{13}\text{C}$  NMR** (101 MHz,  $\text{CDCl}_3$ )  $\delta$  205.3(A), 205.1(B), 141.5(A), 141.5(B), 135.7(A), 135.1(B), 129.2(A), 128.9(B), 128.6(A), 128.5, 128.5(B), 128.1, 128.0(A), 126.4(B), 126.2(A), 126.1(B), 58.5(A), 57.4(B), 43.3(A), 43.1(B), 42.6(A), 38.6(B), 35.4(A), 35.3(B), 31.3(A), 30.7(B).

**HRMS** (ESI): calculated for  $\text{C}_{18}\text{H}_{22}\text{NS}$   $[\text{M}+\text{H}]^+$  284.1468; found: 284.1454.

**FT-IR** (neat): 2925, 1495, 1452, 1398, 1127, 1110, 1075, 1027, 963, 699  $\text{cm}^{-1}$ .

## SUPPORTING INFORMATION

### **4-Phenyl-1-(pyrrolidin-1-yl)butane-1-thione (4h)**

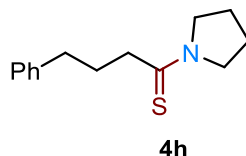

Following procedure A: **4h** was isolated as a yellow oil in 93% yield (43.3 mg; 0.186 mmol) which was purified by silica gel chromatography (PE:EA = 20:1~5:1,  $R_f$  = 0.5 (PE:EA = 5:1)).

**$^1\text{H}$  NMR** (400 MHz,  $\text{CDCl}_3$ )  $\delta$  7.31 – 7.25 (m, 2H), 7.22 – 7.15 (m, 3H), 3.84 (t,  $J$  = 6.9 Hz, 2H), 3.48 (t,  $J$  = 6.8 Hz, 2H), 2.70 (dt,  $J$  = 18.7, 7.8 Hz, 4H), 2.13 (dq,  $J$  = 10.0, 7.7 Hz, 2H), 1.98 (ddt,  $J$  = 30.8, 13.3, 6.7 Hz, 4H).

**$^{13}\text{C}$  NMR** (101 MHz,  $\text{CDCl}_3$ )  $\delta$  200.2, 141.7, 128.6, 128.5, 126.0, 53.9, 50.5, 43.1, 35.3, 30.3, 26.4, 24.4.

**HRMS** (ESI): calculated for  $\text{C}_{14}\text{H}_{20}\text{NS}$   $[\text{M}+\text{H}]^+$  234.1311; found: 234.1308.

**FT-IR** (neat): 2967, 2870, 1485, 1472, 1450, 1329, 1100, 910, 701  $\text{cm}^{-1}$ .

### ***N, N'*-(Propane-1,3-diyl)bis(4-phenylbutanethioamide) (4i)**

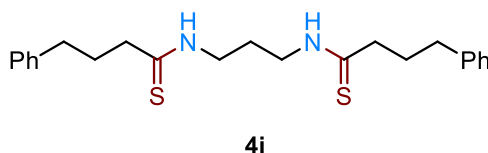

Following procedure A: doubly thioacylated compound **4i** was isolated as a yellow oil in 88% yield (70.1 mg; 0.176 mmol) which was purified by silica gel chromatography (PE:EA = 10:1~1:1,  $R_f$  = 0.45 (PE:EA = 1:1)).

**$^1\text{H}$  NMR** (400 MHz,  $\text{CDCl}_3$ )  $\delta$  8.20 (s, 2H), 7.31 – 7.15 (m, 10H), 3.70 (q,  $J$  = 6.1 Hz, 4H), 2.67 (td,  $J$  = 7.8, 2.9 Hz, 8H), 2.12 (p,  $J$  = 7.6 Hz, 4H), 1.90 (p,  $J$  = 6.1 Hz, 2H).

**$^{13}\text{C}$  NMR** (101 MHz,  $\text{CDCl}_3$ )  $\delta$  205.9, 141.2, 128.5, 128.5, 126.1, 46.5, 42.1, 34.9, 30.8, 26.8.

**HRMS** (ESI): calculated for  $\text{C}_{23}\text{H}_{31}\text{N}_2\text{S}_2$   $[\text{M}+\text{H}]^+$  399.1923; found: 399.1915.

**FT-IR** (neat): 3219, 2928, 2855, 1536, 1495, 1453, 1406, 1125, 700  $\text{cm}^{-1}$ .

## SUPPORTING INFORMATION

### **(R)-4-Phenyl-N-(1-phenylethyl)butanethioamide (4j)**

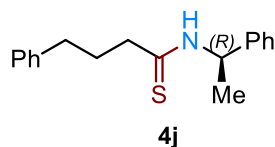

Following procedure A using chiral amine of 98 % ee: **4j** was isolated as a yellow oil in 97% yield (54.9 mg; 0.194 mmol) which was purified by silica gel chromatography (PE:EA = 20:1~5:1,  $R_f$  = 0.6 (PE:EA =5:1)). The ee value was calculated as 98% (Chiralpak AD-H, hexane/*i*-PrOH = 95:5, 254 nm, 1 mL/min,  $t_{\text{major}}$  = 14.52 min,  $t_{\text{minor}}$  = 12.84 min).

$[\alpha]_{25}^D = -20.6$  ( $c$  = 1.00,  $\text{CHCl}_3$ );

$^1\text{H}$  NMR (400 MHz,  $\text{CDCl}_3$ )  $\delta$  7.39 – 7.27 (m, 6H), 7.26 – 7.23 (m, 1H), 7.20 – 7.11 (m, 3H), 5.78 (p,  $J$  = 7.0 Hz, 1H), 2.62 (ddt,  $J$  = 9.5, 7.1, 4.0 Hz, 4H), 2.12 (p,  $J$  = 7.8 Hz, 2H), 1.59 (d,  $J$  = 6.9 Hz, 3H).

### **HPLC traces of compound **4j** as racemate and as isolated from reaction:**

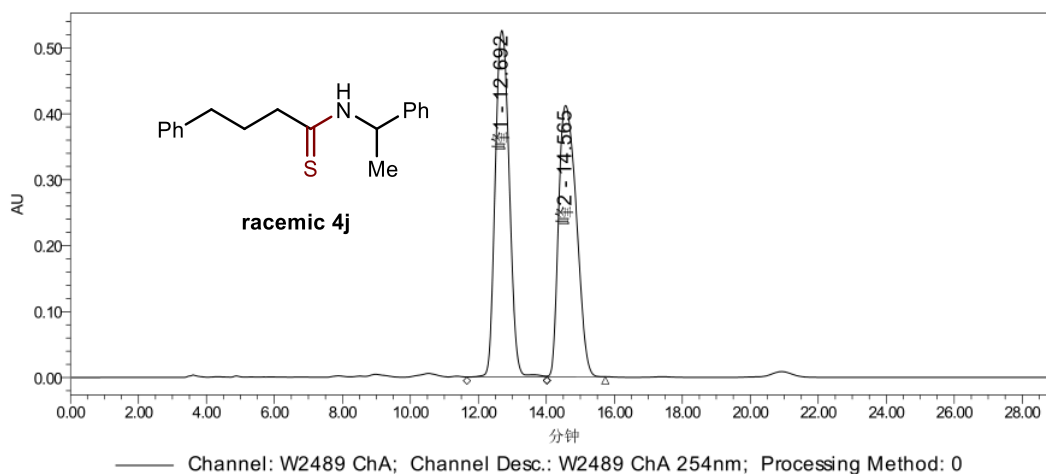

|   | Channel Description | Peak Name | RT (min) | Area (面积*sec) | % Area | Height (峰高) |
|---|---------------------|-----------|----------|---------------|--------|-------------|
| 1 | W2489 ChA 254nm     | 峰1        | 12.692   | 15088970      | 50.21  | 525854      |
| 2 | W2489 ChA 254nm     | 峰2        | 14.565   | 14960524      | 49.79  | 411786      |

## SUPPORTING INFORMATION

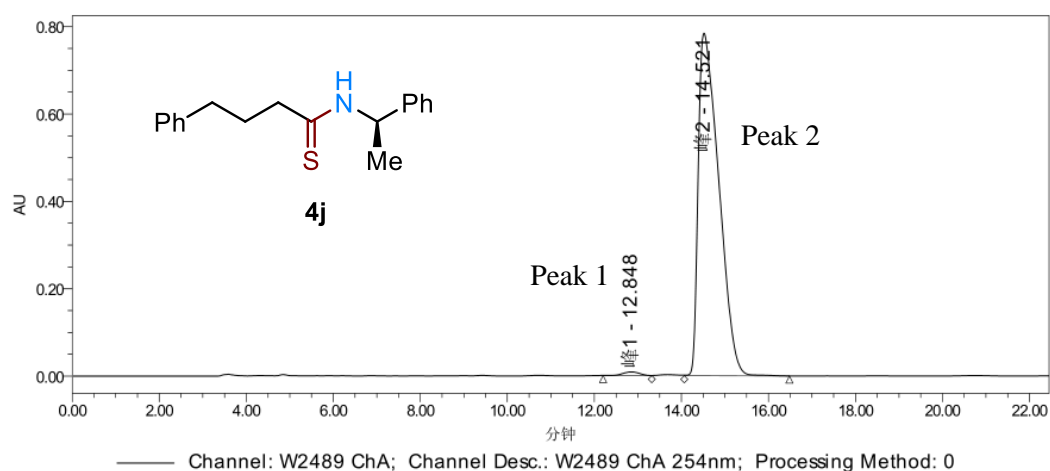

|   | Channel Description | Peak Name | RT (min) | Area (礦*sec) | % Area | Height (礦) |
|---|---------------------|-----------|----------|--------------|--------|------------|
| 1 | W2489 ChA 254nm     | 峰1        | 12.848   | 215375       | 0.83   | 8212       |
| 2 | W2489 ChA 254nm     | 峰2        | 14.521   | 25693593     | 99.17  | 784715     |

### Methyl (4-phenylbutanethioyl)-L-serinate (4k)

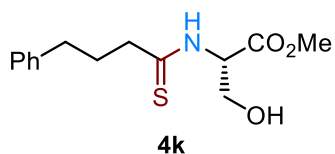

Following procedure A: **4k** was isolated as yellow oil in 82% yield (46.1 mg; 0.164 mmol) which was purified by silica gel chromatography (PE:EA = 5:1~1:1,  $R_f$  = 0.5).

**$^1\text{H}$  NMR** (400 MHz,  $\text{CDCl}_3$ )  $\delta$  8.09 (d,  $J$  = 7.4 Hz, 1H), 7.31 – 7.25 (m, 2H), 7.22 – 7.16 (m, 3H), 5.34 – 5.28 (m, 1H), 4.07 (d,  $J$  = 3.3 Hz, 2H), 3.80 (s, 3H), 2.69 (dt,  $J$  = 12.1, 7.0 Hz, 4H), 2.14 (pd,  $J$  = 7.4, 2.1 Hz, 2H).

**$^{13}\text{C}$  NMR** (101 MHz,  $\text{CDCl}_3$ )  $\delta$  206.5, 170.4, 141.4, 128.6, 128.6, 126.2, 62.1, 59.6, 53.1, 46.0, 34.8, 30.8.

**HRMS** (ESI): calculated for  $\text{C}_{14}\text{H}_{20}\text{NO}_3\text{S}$   $[\text{M}+\text{H}]^+$  282.1158; found: 282.1147.

**FT-IR** (neat): 3310, 2951, 1739, 1517, 1496, 1437, 1406, 1329, 1125, 1067, 909, 701  $\text{cm}^{-1}$ .

### tert-Butyl (4-phenylbutanethioyl)-L-phenylalaninate (4l)

## SUPPORTING INFORMATION

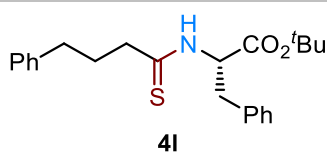

Following procedure A: **4I** was isolated as yellow oil in 80% yield (61.4 mg; 0.160 mmol) which was purified by silica gel chromatography (PE:EA = 20:1~5:1,  $R_f$  = 0.5 (PE:EA = 5:1)).

**$^1\text{H}$  NMR** (400 MHz,  $\text{CDCl}_3$ )  $\delta$  7.66 (d,  $J$  = 7.7 Hz, 1H), 7.28 (d,  $J$  = 6.9 Hz, 1H), 7.26 – 7.19 (m, 4H), 7.19 – 7.11 (m, 5H), 5.26 (td,  $J$  = 7.1, 4.7 Hz, 1H), 3.34 (dd,  $J$  = 13.9, 6.7 Hz, 1H), 3.22 (dd,  $J$  = 13.9, 4.8 Hz, 1H), 2.63 (td,  $J$  = 7.6, 2.9 Hz, 4H), 2.13 – 2.03 (m, 2H), 1.41 (s, 9H).

**$^{13}\text{C}$  NMR** (101 MHz,  $\text{CDCl}_3$ )  $\delta$  204.9, 170.3, 141.4, 135.9, 129.8, 129.6, 128.6, 128.5, 127.3, 126.1, 83.2, 58.8, 46.3, 36.3, 34.9, 30.8, 28.1.

**HRMS** (ESI): calculated for  $\text{C}_{23}\text{H}_{29}\text{NO}_2\text{SNa}$   $[\text{M}+\text{Na}]^+$  406.18112; found: 406.18003.

**FT-IR** (neat): 3303, 2977, 1722, 1512, 1496, 1454, 1401, 1367, 1153, 700  $\text{cm}^{-1}$ .

### 2-Phenyl-N-(3-phenylpropyl)ethanethioamide (5a)

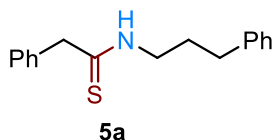

Following procedure A: **5a** was isolated as a yellow oil in 93% yield (50.1 mg; 0.186 mmol) which was purified by silica gel chromatography (PE:EA = 20:1~5:1,  $R_f$  = 0.5 (PE:EA = 5:1)).

**$^1\text{H}$  NMR** (400 MHz,  $\text{CDCl}_3$ )  $\delta$  7.38 – 7.30 (m, 3H), 7.25 – 7.15 (m, 5H), 7.07 – 7.03 (m, 2H), 4.05 (s, 2H), 3.67 – 3.56 (m, 2H), 2.57 – 2.48 (m, 2H), 1.85 (p,  $J$  = 7.5 Hz, 2H).

**$^{13}\text{C}$  NMR** (101 MHz,  $\text{CDCl}_3$ )  $\delta$  202.0, 141.0, 135.1, 129.6, 129.4, 128.7, 128.5, 128.4, 128.0, 126.3, 53.2, 45.7, 33.2, 29.4.

**HRMS** (ESI): calculated for  $\text{C}_{17}\text{H}_{20}\text{NS}$   $[\text{M}+\text{H}]^+$  270.1311; found: 270.1293.

**FT-IR** (neat): 3359, 2926, 1531, 1494, 1453, 1406, 1343, 1121, 1030, 913, 699  $\text{cm}^{-1}$ .

**N-(3-Phenylpropyl)propanethioamide (5b)**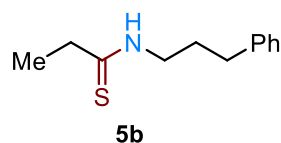

Following procedure A: **5b** was isolated as a yellow oil in 99% yield (41.0 mg; 0.198 mmol) which was purified by silica gel chromatography (PE:EA = 20:1~5:1,  $R_f$  = 0.5 (PE:EA = 5:1)).

**$^1\text{H}$  NMR** (400 MHz,  $\text{CDCl}_3$ )  $\delta$  7.30 – 7.25 (m, 2H), 7.19 (td,  $J$  = 6.6, 1.3 Hz, 3H), 3.70 – 3.62 (m, 2H), 2.72 – 2.64 (m, 2H), 2.58 (q,  $J$  = 7.5 Hz, 2H), 1.98 (p,  $J$  = 7.5 Hz, 2H), 1.22 (t,  $J$  = 7.5 Hz, 3H).

**$^{13}\text{C}$  NMR** (101 MHz,  $\text{CDCl}_3$ )  $\delta$  206.6, 141.2, 128.7, 128.5, 126.3, 46.0, 40.1, 33.5, 29.5, 13.8.

**HRMS** (ESI): calculated for  $\text{C}_{12}\text{H}_{18}\text{NS}$   $[\text{M}+\text{H}]^+$  208.1155; found: 208.1143.

**FT-IR** (neat): 3231, 2976, 1533, 1496, 1452, 1409, 1364, 1145, 1097, 1029, 955, 699  $\text{cm}^{-1}$ .

**Methyl 4-((3-phenylpropyl)amino)-4-thioxobutanoate (5c)**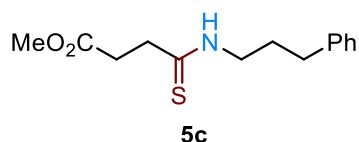

Following procedure A: **5c** was isolated as a yellow oil in 58% yield (30.8 mg; 0.116 mmol) which was purified by silica gel chromatography (PE:EA = 20:1~5:1,  $R_f$  = 0.4 (PE:EA = 5:1)).

**$^1\text{H}$  NMR** (400 MHz,  $\text{CDCl}_3$ )  $\delta$  7.31 – 7.26 (m, 2H), 7.22 – 7.17 (m, 3H), 3.70 – 3.61 (m, 6H), 2.84 (q,  $J$  = 1.8 Hz, 4H), 2.70 – 2.65 (m, 2H), 1.98 (p,  $J$  = 7.5 Hz, 2H).

**$^{13}\text{C}$  NMR** (101 MHz,  $\text{CDCl}_3$ )  $\delta$  203.1, 174.0, 141.2, 128.6, 128.5, 126.2, 52.1, 45.9, 40.8, 33.4, 32.9, 29.5.

**HRMS** (ESI): calculated for  $\text{C}_{14}\text{H}_{20}\text{NO}_2\text{S}$   $[\text{M}+\text{H}]^+$  266.1209; found: 266.1202.



## SUPPORTING INFORMATION

**FT-IR** (neat): 3321, 2947, 1736, 1535, 1496, 1437, 1343, 1171, 1133, 1088, 919, 700  $\text{cm}^{-1}$ .

### 2-(1,3-Dioxolan-2-yl)-N-(3-phenylpropyl)ethanethioamide (5d)

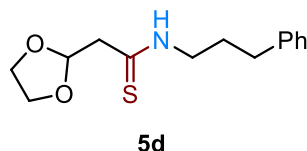

Following procedure A: **5d** was isolated as a yellow oil in 98% yield (52.0 mg; 0.196 mmol) which was purified by silica gel chromatography (PE:EA = 20:1~5:1,  $R_f$  = 0.5 (PE:EA = 5:1)).

**$^1\text{H}$  NMR** (400 MHz,  $\text{CDCl}_3$ )  $\delta$  7.31 – 7.24 (m, 2H), 7.21 – 7.15 (m, 3H), 5.13 (t,  $J$  = 4.6 Hz, 1H), 3.98 – 3.84 (m, 4H), 3.70 – 3.63 (m, 2H), 3.04 (d,  $J$  = 4.6 Hz, 2H), 2.71 – 2.65 (m, 2H), 1.98 (p,  $J$  = 7.5 Hz, 2H).

**$^{13}\text{C}$  NMR** (101 MHz,  $\text{CDCl}_3$ )  $\delta$  198.1, 141.1, 128.6, 128.5, 126.3, 102.3, 65.1, 50.9, 45.9, 33.3, 29.5.

**HRMS** (ESI): calculated for  $\text{C}_{14}\text{H}_{20}\text{NO}_2\text{S}$   $[\text{M}+\text{H}]^+$  266.1209; found: 266.1199.

**FT-IR** (neat): 3277, 2925, 2884, 1541, 1496, 1453, 1408, 1361, 1123, 1083, 1033, 943, 909, 701  $\text{cm}^{-1}$ .

### 3-Hydroxy-N-(3-phenylpropyl)propanethioamide (5e)

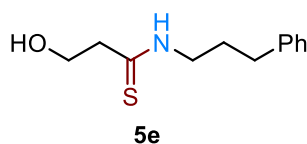

Following procedure A: **5e** was isolated as yellow oil in 90% yield (40.1 mg; 0.18 mmol) which was purified by silica gel chromatography (PE:EA=5:1~1:1,  $R_f$  = 0.3 (PE:EA = 5:1)).

**$^1\text{H}$  NMR** (400 MHz,  $\text{CDCl}_3$ )  $\delta$  7.81 (s, 1H), 7.33 – 7.27 (m, 2H), 7.21 (td,  $J$  = 7.7, 6.7, 1.5 Hz, 3H), 3.95 – 3.88 (m, 2H), 3.75 – 3.65 (m, 2H), 2.81 – 2.66 (m, 4H), 2.01 (p,  $J$  = 7.4 Hz, 2H).

## SUPPORTING INFORMATION

**$^{13}\text{C}$  NMR** (101 MHz,  $\text{CDCl}_3$ )  $\delta$  203.0, 141.1, 128.7, 128.5, 126.4, 60.7, 47.6, 45.8, 33.5, 29.5.

**HRMS** (ESI): calculated for  $\text{C}_{12}\text{H}_{18}\text{NOS}$   $[\text{M}+\text{H}]^+$  224.1104; found: 224.1102.

**FT-IR** (neat): 3239, 2931, 2861, 1542, 1496, 1452, 1404, 1135, 1085, 1045, 914, 700  $\text{cm}^{-1}$ .

### ***N*-(3-Phenylpropyl)benzothioamide (5f)**

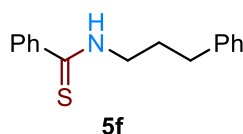

Following procedure A: **5f** was isolated as a yellow oil in 92% yield (46.9 mg; 0.184 mmol) which was purified by silica gel chromatography (PE:EA = 20:1~5:1,  $R_f$  = 0.6 (PE:EA = 5:1)).

**$^1\text{H}$  NMR** (399 MHz,  $\text{CDCl}_3$ )  $\delta$  7.61 – 7.48 (m, 3H), 7.46 – 7.38 (m, 1H), 7.35 – 7.27 (m, 4H), 7.26 – 7.18 (m, 3H), 3.84 (td,  $J$  = 7.0, 5.4 Hz, 2H), 2.76 (t,  $J$  = 7.6 Hz, 2H), 2.09 (p,  $J$  = 7.1 Hz, 2H).

**$^{13}\text{C}$  NMR** (101 MHz,  $\text{CDCl}_3$ )  $\delta$  199.1, 141.9, 141.2, 131.1, 128.8, 128.5 (2C), 126.7, 126.4, 46.8, 33.8, 29.6.

**HRMS** (ESI): calculated for  $\text{C}_{16}\text{H}_{18}\text{NS}$   $[\text{M}+\text{H}]^+$  256.1155; found: 256.1138.

**FT-IR** (neat): 3361, 2925, 2858, 1522, 1487, 1449, 1388, 1334, 1178, 1100, 1070, 1029, 943, 695  $\text{cm}^{-1}$ .

### **5-Chloro-*N*-(3-phenylpropyl)pentanethioamide (5g)**

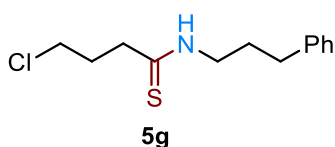

Following procedure A: **5g** was isolated as a yellow oil in 62% yield (31.7 mg; 0.124 mmol) which was purified by silica gel chromatography (PE:EA = 20:1~5:1,  $R_f$  = 0.45 (PE:EA = 5:1)).

## SUPPORTING INFORMATION

**$^1\text{H}$  NMR** (400 MHz,  $\text{CDCl}_3$ )  $\delta$  7.32 – 7.25 (m, 2H), 7.19 (dd,  $J$  = 17.8, 7.2 Hz, 3H), 3.22 (q,  $J$  = 5.3 Hz, 4H), 2.69 (dt,  $J$  = 13.7, 7.3 Hz, 4H), 2.06 (dp,  $J$  = 35.3, 6.8 Hz, 4H).

**$^{13}\text{C}$  NMR** (101 MHz,  $\text{CDCl}_3$ )  $\delta$  173.2, 142.2, 128.5, 128.3, 125.7, 57.2, 38.8, 33.8, 33.8, 31.9, 27.0.

**HRMS** (ESI): calculated for  $\text{C}_{13}\text{H}_{19}\text{ClNS}$   $[\text{M}+\text{H}]^+$  256.0921; found: 256.0901.

**FT-IR** (neat): 3268, 2934, 2886, 1538, 1495, 1453, 1409, 1121, 943, 701  $\text{cm}^{-1}$ .

### ***N*-(3-phenylpropyl)thioformamide (5h)**

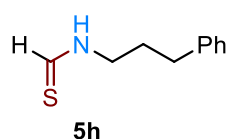

Following procedure A: the thioformamide **5h** was isolated as a yellow oil in 95% yield (34.0 mg; 0.19 mmol) which was purified by silica gel chromatography (PE:EA = 10:1~2:1,  $R_f$  = 0.45 (PE:EA = 2:1)).

**$^1\text{H}$  NMR** (400 MHz,  $\text{CDCl}_3$ )  $\delta$  7.30 – 7.24 (m, 2H), 7.22 – 7.13 (m, 3H), 5.81 (s, 1H), 3.31 (s, 2H), 2.65 (t,  $J$  = 7.5 Hz, 2H), 1.88 (p,  $J$  = 7.2 Hz, 2H).

**$^{13}\text{C}$  NMR** (101 MHz,  $\text{CDCl}_3$ )  $\delta$  181.4, 141.1, 128.7, 128.5, 126.3, 43.8, 33.3, 30.4.

**HRMS** (ESI): calculated for  $\text{C}_{10}\text{H}_{14}\text{NS}$   $[\text{M}+\text{H}]^+$  180.0842; found: 180.0837.

**FT-IR** (neat): 3257, 2936, 1601, 1552, 1495, 1453, 1354, 1180, 1120, 1030, 907, 700  $\text{cm}^{-1}$ .

### **2-Oxo-2-phenyl-*N*-(3-phenylpropyl)ethanethioamide (5i)**

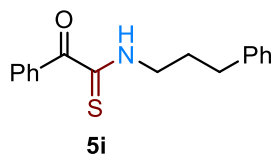

Following procedure A: **5i** was isolated as a yellow oil in 62% yield (35.1 mg; 0.124 mmol) which was purified by silica gel chromatography (PE:EA = 20:1~5:1,  $R_f$  = 0.45 (PE:EA = 5:1)).

## SUPPORTING INFORMATION

**<sup>1</sup>H NMR** (400 MHz, CDCl<sub>3</sub>) δ 8.41 (s, 1H), 8.03 – 7.98 (m, 2H), 7.60 – 7.53 (m, 1H), 7.42 (t, *J* = 7.8 Hz, 2H), 7.33 – 7.26 (m, 2H), 7.20 (td, *J* = 5.2, 4.8, 2.3 Hz, 3H), 3.86 – 3.75 (m, 2H), 2.79 – 2.72 (m, 2H), 2.10 (p, *J* = 7.5 Hz, 2H).

**<sup>13</sup>C NMR** (101 MHz, CDCl<sub>3</sub>) δ 193.8, 188.0, 140.8, 134.0, 133.8, 130.8, 128.7, 128.5, 128.3, 126.4, 44.9, 33.4, 29.3.

**HRMS** (ESI): calculated for C<sub>17</sub>H<sub>18</sub>NOS [M+H]<sup>+</sup> 284.1104; found: 284.1103.

**FT-IR** (neat): 3281, 2925, 2861, 1663, 1594, 1530, 1448, 1399, 1177, 1119, 1065, 895, 694 cm<sup>-1</sup>.

### (rac)-2-Phenyl-N-(3-phenylpropyl)propanethioamide (5j)

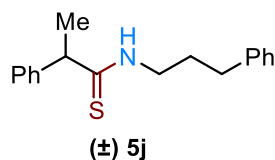

Following procedure A: racemic **5j** was isolated as a yellow oil in 72% yield (40.8 mg; 0.144 mmol) which was purified by silica gel chromatography (PE:EA = 20:1~5:1, *R<sub>f</sub>* = 0.5 (PE:EA = 5:1)).

**<sup>1</sup>H NMR** (400 MHz, CDCl<sub>3</sub>) δ 7.40 – 7.16 (m, 8H), 7.08 – 7.02 (m, 2H), 6.91 (s, 1H), 4.03 (q, *J* = 7.2 Hz, 1H), 3.61 (td, *J* = 7.0, 5.8 Hz, 2H), 2.56 – 2.49 (m, 2H), 1.86 (dt, *J* = 14.4, 7.1 Hz, 2H), 1.67 (d, *J* = 7.2 Hz, 3H).

**<sup>13</sup>C NMR** (101 MHz, CDCl<sub>3</sub>) δ 207.4, 140.9, 129.1, 128.6, 128.3, 127.8, 126.2, 54.9, 45.5, 33.2, 29.3, 21.2.

**HRMS** (ESI): calculated for C<sub>18</sub>H<sub>22</sub>NS [M+H]<sup>+</sup> 284.1468; found: 284.1460.

**FT-IR** (neat): 3244, 2923, 1537, 1495, 1453, 1412, 1126, 1085, 699 cm<sup>-1</sup>.

### (rac)-3,3,3-Trifluoro-2-phenyl-N-(3-phenylpropyl)propanethioamide (5k)

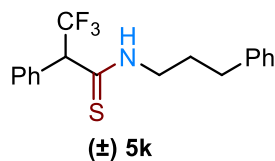

## SUPPORTING INFORMATION

Following procedure A: racemic **5k** was isolated as a yellow oil in 60% yield (40.4 mg; 0.120 mmol) which was purified by silica gel chromatography (PE:EA = 20:1~5:1,  $R_f$  = 0.45 (PE:EA = 5:1)).

**$^1\text{H}$  NMR** (400 MHz,  $\text{CDCl}_3$ )  $\delta$  7.42 – 7.36 (m, 4H), 7.31 – 7.17 (m, 5H), 7.13 – 7.07 (m, 2H), 4.90 (q,  $J$  = 9.3 Hz, 1H), 3.65 (tq,  $J$  = 13.4, 6.7 Hz, 2H), 2.57 (dt,  $J$  = 13.5, 7.6 Hz, 2H), 1.94 (p,  $J$  = 7.3 Hz, 2H).

**$^{13}\text{C}$  NMR** (101 MHz,  $\text{CDCl}_3$ )  $\delta$  194.1, 140.7, 129.3, 129.3, 129.2, 129.1, 128.7, 128.6, 128.5, 128.4, 126.3, 126.1, 124.3 (d,  $J$  = 281.6 Hz), 64.7 (q,  $J$  = 26.9 Hz), 46.0, 33.1, 29.1.

**$^{19}\text{F}$  NMR** (377 MHz,  $\text{CDCl}_3$ )  $\delta$  64.71.

**HRMS** (ESI): calculated for  $\text{C}_{18}\text{H}_{19}\text{F}_3\text{NS}$   $[\text{M}+\text{H}]^+$  338.1185; found: 338.1173.

**FT-IR** (neat): 3276, 2927, 1558, 1540, 1496, 1456, 1363, 1162, 1116, 913, 700  $\text{cm}^{-1}$ .

### (rac)-N-(1-Phenyl-2-((3-phenylpropyl)amino)-2-thioxoethyl)acetamide (5l)

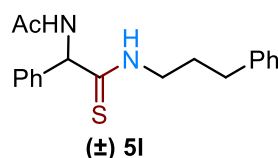

Following procedure A: racemic **5l** was isolated as a yellow oil in 89% yield (58.1 mg; 0.178 mmol) which was purified by silica gel chromatography (PE:EA = 20:1~5:1,  $R_f$  = 0.4 (PE:EA = 5:1)).

**$^1\text{H}$  NMR** (400 MHz,  $\text{CDCl}_3$ )  $\delta$  9.69 (s, 1H), 7.73 (d,  $J$  = 8.0 Hz, 1H), 7.50 – 7.44 (m, 2H), 7.26 – 7.18 (m, 5H), 7.17 – 7.11 (m, 1H), 7.04 – 6.98 (m, 2H), 6.20 (d,  $J$  = 8.0 Hz, 1H), 3.63 – 3.40 (m, 2H), 2.51 (t,  $J$  = 7.7 Hz, 2H), 2.05 (s, 3H), 1.84 (dtd,  $J$  = 14.7, 6.3, 3.2 Hz, 2H).

**$^{13}\text{C}$  NMR** (101 MHz,  $\text{CDCl}_3$ )  $\delta$  201.2, 169.4, 141.1, 139.6, 128.7, 128.5, 128.4, 128.2, 126.7, 126.1, 60.6, 45.7, 33.1, 29.1, 23.7.

**HRMS** (ESI): calculated for  $\text{C}_{19}\text{H}_{22}\text{N}_2\text{OSNa}$   $[\text{M}+\text{Na}]^+$  349.1345; found: 349.1343.

**FT-IR** (neat): 3248, 2963, 1654, 1496, 1452, 1124, 1080, 969, 699  $\text{cm}^{-1}$ .

## SUPPORTING INFORMATION

### (rac)-Benzyl-(1-phenyl-2-((3-phenylpropyl)amino)-2-thioxoethyl)carbamate (5m)

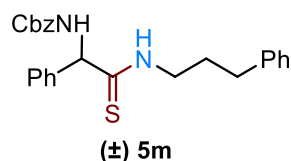

Following procedure A: racemic **5m** was isolated as a yellow oil in 75% yield (62.7 mg; 0.15 mmol) which was purified by silica gel chromatography (PE:EA = 20:1~5:1,  $R_f$ =0.4 (PE:EA = 5:1)).

**$^1\text{H}$  NMR** (399 MHz,  $\text{CDCl}_3$ )  $\delta$  8.39 (d,  $J$  = 81.5 Hz, 1H), 7.47 – 7.13 (m, 14H), 7.05 – 6.93 (m, 2H), 6.79 (d,  $J$  = 23.9 Hz, 1H), 5.69 – 5.51 (m, 1H), 5.10 – 4.98 (m, 2H), 3.53 (dqt,  $J$  = 26.5, 13.2, 6.7 Hz, 2H), 2.48 (h,  $J$  = 7.4 Hz, 2H), 1.91 – 1.71 (m, 2H).

**$^{13}\text{C}$  NMR** (100 MHz,  $\text{CDCl}_3$ )  $\delta$  201.1, 155.6, 140.9, 139.3, 135.9, 128.9, 128.6, 128.5, 128.5, 128.3, 127.9, 127.8, 126.8, 126.2, 67.2, 63.1, 45.6, 33.1, 29.2.

**HRMS** (ESI): calculated for  $\text{C}_{25}\text{H}_{27}\text{N}_2\text{O}_2\text{S}$   $[\text{M}+\text{H}]^+$  419.1788; found: 419.1785.

**FT-IR** (neat): 3285, 1701, 1602, 1541, 1497, 1452, 1374, 1217, 1155, 1129, 1084, 1061, 1027, 913, 698  $\text{cm}^{-1}$ .

### *N*-(1-Benzylpiperidin-4-yl)-4-iodobenzothioamide (6a)

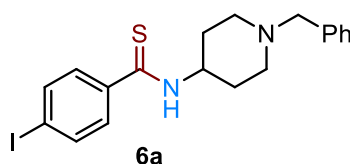

Following procedure A: **6a** was isolated as a yellow solid in 72% yield (62.7 mg; 0.144 mmol) which was purified by silica gel chromatography (DCM:EA = 100:1~5:1,  $R_f$  = 0.5 (PE:EA = 5:1)).

**$^1\text{H}$  NMR** (400 MHz,  $\text{CDCl}_3$ )  $\delta$  7.73 (d,  $J$  = 1.9 Hz, 1H), 7.71 (d,  $J$  = 1.9 Hz, 1H), 7.43 (d,  $J$  = 2.2 Hz, 1H), 7.42 (d,  $J$  = 2.2 Hz, 1H), 7.34 – 7.26 (m, 5H), 4.59 – 4.48 (m, 1H), 3.54 (s, 2H), 2.87 (dt,  $J$  = 12.4, 3.4 Hz, 2H), 2.30 – 2.13 (m, 4H), 1.71 – 1.56 (m, 2H).

**$^{13}\text{C}$  NMR** (101 MHz,  $\text{CDCl}_3$ )  $\delta$  197.1, 141.5, 138.0, 137.7, 129.3, 128.4, 128.3, 127.4, 97.9, 63.1, 53.3, 52.1, 30.8.

## SUPPORTING INFORMATION

**HRMS** (ESI): calculated for  $C_{19}H_{22}IN_2S$   $[M+H]^+$  437.0543; found: 437.0532.

**FT-IR** (neat): 2921, 1580, 1517, 1478, 1398, 1140, 1079, 1005, 943, 825, 697  $cm^{-1}$ .

### **N-(2,6-Dioxopiperidin-3-yl)-2-(4-hydroxyphenyl)ethanethioamide (6b)**

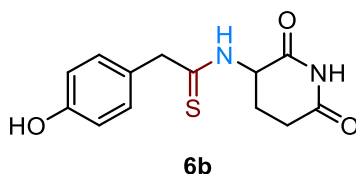

Following procedure A: **6b** was isolated as a yellow solid in 88% yield (48.9 mg; 0.176 mmol) which was purified by silica gel chromatography (PE:EA = 5:1~1:1,  $R_f$  = 0.2 (PE:EA = 5:1).

**$^1H$  NMR** (400 MHz,  $DMSO-d_6$ )  $\delta$  10.99 (s, 1H), 10.37 (d,  $J$  = 8.2 Hz, 1H), 9.27 (s, 1H), 7.13 (d,  $J$  = 8.5 Hz, 2H), 6.68 (d,  $J$  = 8.5 Hz, 2H), 5.34 (ddd,  $J$  = 12.9, 8.0, 5.2 Hz, 1H), 3.83 (s, 2H), 2.73 (ddd,  $J$  = 18.4, 13.3, 5.5 Hz, 1H), 2.53 (t,  $J$  = 3.8 Hz, 1H), 2.14 – 2.03 (m, 1H), 1.90 (qd,  $J$  = 12.6, 4.7 Hz, 1H).

**$^{13}C$  NMR** (101 MHz,  $DMSO-d_6$ )  $\delta$  203.5, 173.2, 171.5, 156.6, 130.3, 128.0, 115.5, 55.2, 51.0, 31.1, 23.4.

**HRMS** (ESI): calculated for  $C_{13}H_{15}N_2O_3S$   $[M+H]^+$  279.0798; found: 279.0916.

**FT-IR** (neat): 3234, 2860, 1730, 1682, 1530, 1512, 1453, 1330, 1120, 713  $cm^{-1}$ .

### **1-(4-(8-Chlorodibenzo[b,f][1,4]oxazepin-11-yl)piperazin-1-yl)-4-phenylbutane-1-thione (6c)**

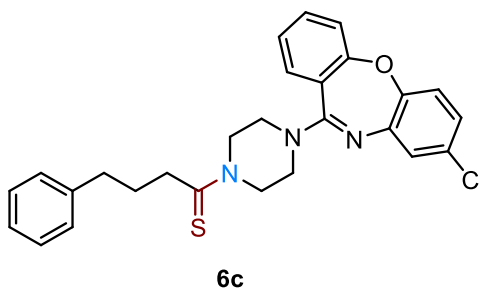

## SUPPORTING INFORMATION

Following procedure A: **6c** was isolated as a yellow solid in 90% yield (85.5 mg; 0.180 mmol) which was purified by silica gel chromatography (PE:EA = 20:1~5:1,  $R_f$ =0.3 (PE:EA = 5:1)).

**$^1\text{H}$  NMR** (400 MHz,  $\text{CDCl}_3$ )  $\delta$  7.40 (dd,  $J$  = 8.7, 2.6 Hz, 1H), 7.32 – 7.24 (m, 3H), 7.22 – 7.13 (m, 5H), 7.13 – 7.07 (m, 2H), 7.05 – 6.99 (m, 1H), 4.38 (s, 2H), 3.64 (d,  $J$  = 56.9 Hz, 6H), 2.92 – 2.84 (m, 2H), 2.72 (t,  $J$  = 7.4 Hz, 2H), 2.11 – 2.00 (m, 2H).

**$^{13}\text{C}$  NMR** (101 MHz,  $\text{CDCl}_3$ )  $\delta$  203.8, 159.5, 158.4, 151.8, 141.3, 139.7, 133.2, 130.6, 128.9, 128.6, 128.6, 127.2, 126.3, 126.1, 125.3, 124.6, 123.1, 120.4, 60.5, 49.4, 48.9, 47.2, 43.1, 35.4, 30.9.

**HRMS** (ESI): calculated for  $\text{C}_{27}\text{H}_{27}\text{ClN}_3\text{OS}$   $[\text{M}+\text{H}]^+$  476.1558; found: 476.1559.

**FT-IR** (neat): 2926, 1602, 1588, 1559, 1470, 1433, 1187, 1111, 1002, 700  $\text{cm}^{-1}$ .

### 4-Cyclopropyl-6-fluoro-1-oxo-7-(4-(4-phenylbutanethioyl)piperazin-1-yl)-1,4-dihydronaphthalene-2-carboxylic acid (6d)

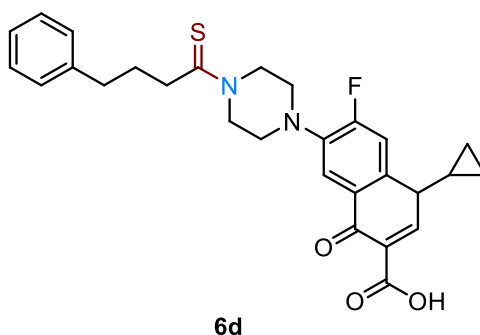

Following procedure A: **6d** was isolated as a yellow solid in 56% yield (55.1 mg; 0.112 mmol) which was purified by silica gel chromatography (DCM: MeOH = 100:1~20:1,  $R_f$  = 0.5 (DCM: MeOH = 20:1)).

**$^1\text{H}$  NMR** (400 MHz,  $\text{CDCl}_3$ )  $\delta$  14.88 (s, 1H), 8.68 (s, 1H), 7.95 (d,  $J$  = 12.9 Hz, 1H), 7.35 – 7.27 (m, 3H), 7.23 – 7.19 (m, 2H), 4.59 – 4.54 (m, 1H), 3.89 – 3.85 (m, 1H), 3.56 (dp,  $J$  = 7.1, 4.1 Hz, 1H), 3.47 – 3.39 (m, 3H), 2.96 – 2.84 (m, 2H), 2.75 (t,  $J$  = 7.6 Hz, 2H), 2.15 – 1.97 (m, 2H), 1.43 – 1.13 (m, 6H).



## SUPPORTING INFORMATION

**$^{13}\text{C}$  NMR** (101 MHz,  $\text{CDCl}_3$ )  $\delta$  204.0, 177.0, 166.8, 152.2, 147.6, 144.82 (d,  $J = 9.8$  Hz), 141.3, 139.1, 128.6, 128.6, 126.3, 120.20 (d,  $J = 7.8$  Hz), 112.55 (d,  $J = 23.1$  Hz), 108.1, 105.0, 49.9, 49.0, 48.6, 42.9, 35.5, 35.4, 30.9, 8.4.

**$^{19}\text{F}$  NMR** (377 MHz,  $\text{CDCl}_3$ )  $\delta$  -121.22.

**HRMS** (ESI): calculated for  $\text{C}_{28}\text{H}_{30}\text{FN}_2\text{O}_3\text{S}$   $[\text{M}+\text{H}]^+$  493.1956; found: 493.1948.

**FT-IR** (neat): 3008, 2920, 1723, 1628, 1508, 1491, 1467, 1110, 892, 704  $\text{cm}^{-1}$ .

**1-(4-(8-Chloro-5,6-dihydro-11H-benzo[5,6]cyclohepta[1,2-b]pyridin-11-ylidene)piperidin-1-yl)-4-phenylbutane-1-thione (6e)**

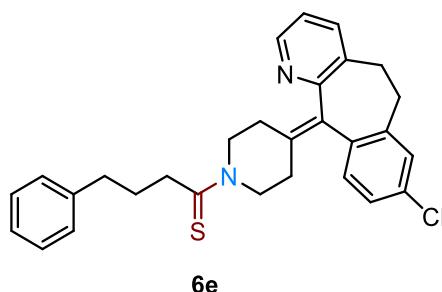

Following procedure A: **6e** was isolated as a yellow solid in 86% yield (81.2 mg; 0.172 mmol) which was purified by silica gel chromatography (PE:EA = 20:1~5:1,  $R_f=0.3$  (PE:EA = 5:1)).

**$^1\text{H}$  NMR** (400 MHz,  $\text{CDCl}_3$ )  $\delta$  8.40 (d,  $J = 4.9$  Hz, 1H), 7.45 (ddd,  $J = 8.0, 3.3, 1.8$  Hz, 1H), 7.29 – 7.23 (m, 3H), 7.20 – 7.07 (m, 7H), 4.71 (dt,  $J = 13.2, 5.2$  Hz, 1H), 3.89 – 3.71 (m, 2H), 3.50 – 3.24 (m, 3H), 2.93 – 2.65 (m, 7H), 2.62 – 2.31 (m, 3H), 2.11 – 1.94 (m, 2H).

**$^{13}\text{C}$  NMR** (101 MHz,  $\text{CDCl}_3$ )  $\delta$  202.6, 156.6, 146.8, 141.4, 139.6, 138.0, 137.3, 135.4, 133.6, 130.5, 130.3, 129.2, 128.5, 126.4, 126.1, 122.6, 50.9, 49.4, 43.3, 35.5, 31.7, 31.2, 30.8, 29.8, 29.5.

**HRMS** (ESI): calculated for  $\text{C}_{29}\text{H}_{30}\text{ClN}_2\text{S}$   $[\text{M}+\text{H}]^+$  473.1813; found: 473.1804.

**FT-IR** (neat): 2919, 2861, 1589, 1560, 1494, 1478, 1457, 1437, 1361, 1100, 990, 701  $\text{cm}^{-1}$ .

## SUPPORTING INFORMATION

### 3.2.2 General synthesis of thiopeptides from chiral nitro compounds and chiral amino acid esters.

**Table S2.** Optimization of reaction conditions with  $\beta$ -amino chiral nitroalkanes<sup>a</sup>

$\text{7a (ee = 99\%)} + \text{2a} \xrightarrow[\text{THF, temp}]{\text{S source (Y equiv.)}, \text{Na}_2\text{S (X equiv.)}} \text{8a}$

$\text{Lg}^1\text{-S-Lg}^2 \equiv \text{S source}$

$\text{3d}$        $\text{S}_8$

| entry | Na <sub>2</sub> S (equiv.) | S source (equiv.)     | Temperature (°C) | time (h) | yield (%) | ee (%) |
|-------|----------------------------|-----------------------|------------------|----------|-----------|--------|
| 1     | 2                          | S <sub>8</sub> (1.25) | rt               | 24       | 96        | 76     |
| 2     | 2                          | S <sub>8</sub> (1.25) | 50               | 24       | 99        | 45     |
| 3     | 3                          | S <sub>8</sub> (1.25) | rt               | 24       | 78        | 72     |
| 4     | 2                          | <b>3d</b> (2)         | rt               | 24       | 88        | 63     |
| 5     | 2                          | S <sub>8</sub> (1.25) | 0                | 36       | 72        | 98     |
| 6     | 2                          | <b>3d</b> (2)         | 0                | 36       | 85        | 94     |
| 7     | 2                          | <b>3d</b> (2)         | -10              | 24       | 73        | 99     |
| 8     | 2                          | <b>3d</b> (2)         | -10              | 36       | 81        | 99     |

<sup>a</sup>Unless noted otherwise, reactions were carried out with 0.1 mmol of **7a**, 0.2 mmol of **2a**, 0.2 mmol S source and 0.2 mmol of Na<sub>2</sub>S in 1 ml of THF. <sup>b</sup>Yield of isolated product.

**General procedure B:** The chiral  $\beta$ -amino nitro compound **7** (0.1 mmol) was added to a 10 mL reaction tube, followed by the addition of THF (1 mL) and cooled down to -10°C. Then Na<sub>2</sub>S (2.0 equiv., 0.2 mmol), **3d** (2 equiv.) and the amine **9** (2 equiv.) were added and stirred at -10°C. The reaction was monitored by TLC until the reaction was

## SUPPORTING INFORMATION

complete, typically complete within 36h, quenched with saturated ammonium chloride, and the crude product was extracted with ethyl acetate, and the organic phase collected and dried over anhydrous Na<sub>2</sub>SO<sub>4</sub>. After filtration, the solution was concentrated under reduced pressure and the crude residue was separated by flash-column chromatography.

### **tert-Butyl (R)-(4-phenyl-1-((3-phenylpropyl)amino)-1-thioxobutan-2-yl)carbamate (8a)**

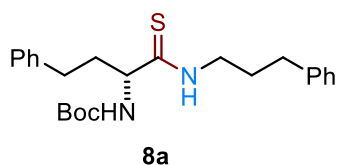

Following procedure B: **8a** was isolated as a colorless oil in 81% yield (33.4 mg; 0.081 mmol) which was purified by silica gel chromatography (PE:EA = 20:1~5:1,  $R_f$  = 0.45 (PE:EA = 5:1)).  $[\alpha]_{25 D}^{25} = 15.6$  ( $c = 1.00$ , CHCl<sub>3</sub>). ee = 99% (Chiralpak AD-H, hexane/*i*-PrOH=95:5, 214 nm, 1 mL/min,  $t_{major}$  = 21.47 min,  $t_{minor}$  = 14.32 min).

**<sup>1</sup>H NMR** (400 MHz, CDCl<sub>3</sub>)  $\delta$  8.51 (s, 1H), 7.30 – 7.11 (m, 11H), 5.45 (d,  $J = 8.7$  Hz, 1H), 4.36 (q,  $J = 8.2$  Hz, 1H), 3.63 (ddt,  $J = 26.5, 13.1, 6.8$  Hz, 2H), 2.64 (t,  $J = 7.6$  Hz, 4H), 2.20 – 1.85 (m, 4H), 1.41 (s, 9H).

**<sup>13</sup>C NMR** (101 MHz, CDCl<sub>3</sub>)  $\delta$  204.3, 156.0, 141.1, 140.9, 128.7, 128.6, 128.6, 128.5, 126.5, 126.2, 80.4, 60.3, 45.4, 37.3, 33.4, 32.3, 29.4, 28.5.

**HRMS** (ESI): calculated for C<sub>24</sub>H<sub>32</sub>N<sub>2</sub>O<sub>2</sub>SNa [M+Na]<sup>+</sup> 435.2077; found: 435.2072.

**FT-IR** (neat): 3274, 3003, 2986, 1692, 1553, 1496, 1454, 1366, 1166, 1129, 1051, 699 cm<sup>-1</sup>.

HPLC traces of compound **8a**:

## SUPPORTING INFORMATION

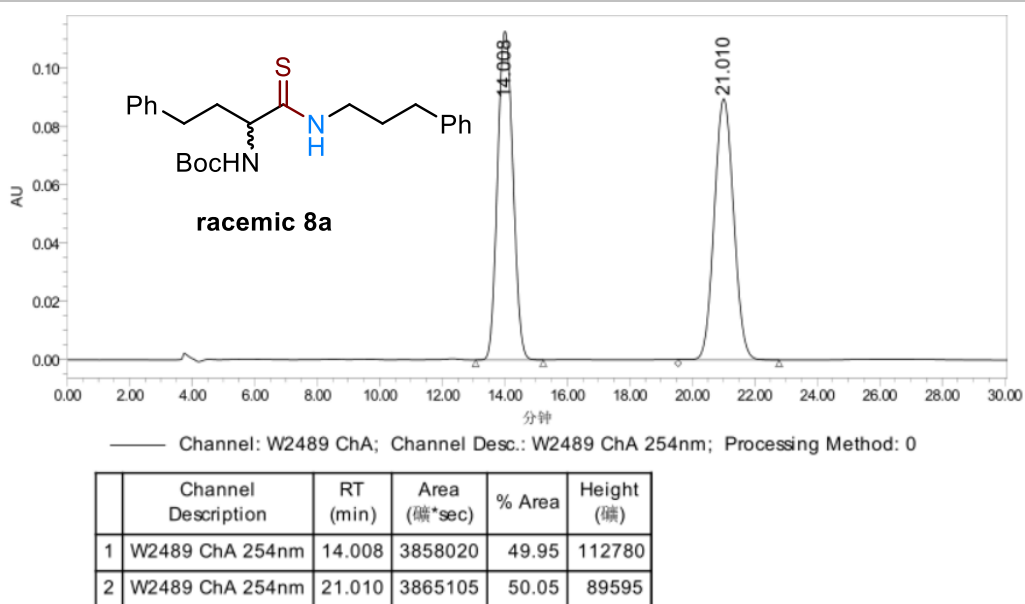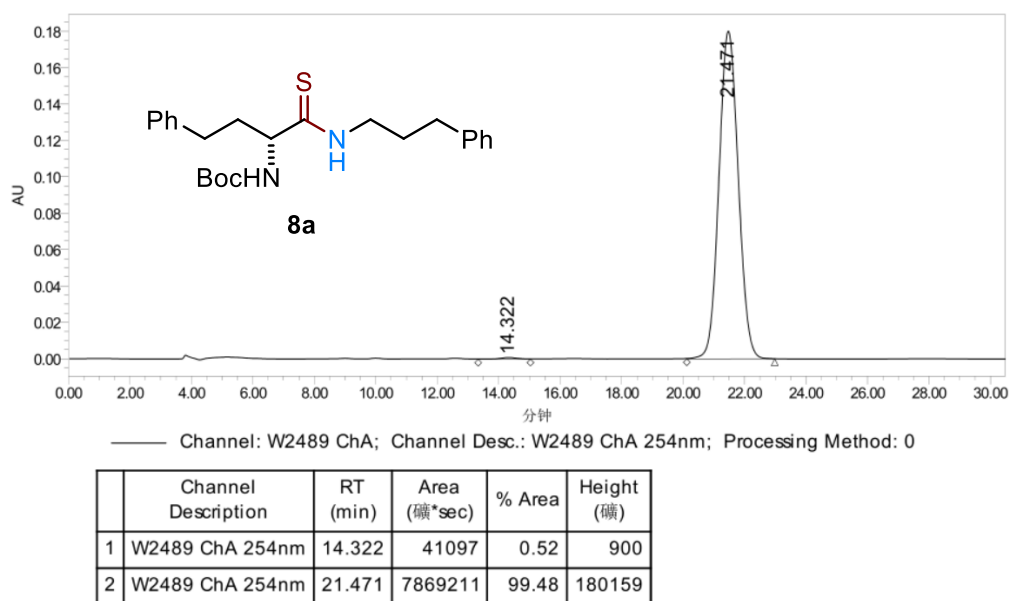

### **tert-Butyl (R)-(1-phenyl-2-((3-phenylpropyl)amino)-2-thioxoethyl)carbamate (8b)**

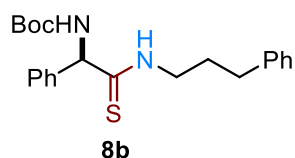

Followed the general procedure B (at -30°C): **8b** was isolated as a yellow oil in 49% yield. The ee value was 86% (Chiralpak AD-H, hexane/*i*-PrOH=95:5, 254 nm, 1 mL/min,  $t_{\text{major}}$ = 28.95 min,  $t_{\text{minor}}$ = 14.37 min).

## SUPPORTING INFORMATION

**$^1\text{H}$  NMR** (400 MHz,  $\text{CDCl}_3$ )  $\delta$  7.94 (s, 1H), 7.41 – 7.15 (m, 10H), 7.12 – 7.05 (m, 2H), 6.15 (s, 1H), 5.40 (d,  $J$  = 6.4 Hz, 1H), 3.64 (d,  $J$  = 26.4, 6.8 Hz, 2H), 2.55 (t,  $J$  = 7.6 Hz, 2H), 1.90 (dh,  $J$  = 13.7, 6.4 Hz, 2H), 1.41 (s, 9H).

**$^{13}\text{C}$  NMR** (101 MHz,  $\text{CDCl}_3$ )  $\delta$  201.8, 155.2, 141.0, 139.5, 129.0, 128.6, 128.5, 127.0, 126.3, 80.5, 63.6, 45.6, 33.3, 29.3, 28.4.

**HRMS** (ESI): calculated for  $\text{C}_{22}\text{H}_{28}\text{N}_2\text{O}_2\text{S}$   $[\text{M}+\text{Na}]^+$  407.1764; found: 407.1782.

**FT-IR** (neat): 3279, 2976, 1689, 1553, 1495, 1454, 1366, 1165, 1058, 699  $\text{cm}^{-1}$ .

HPLC traces of compound **8b**:

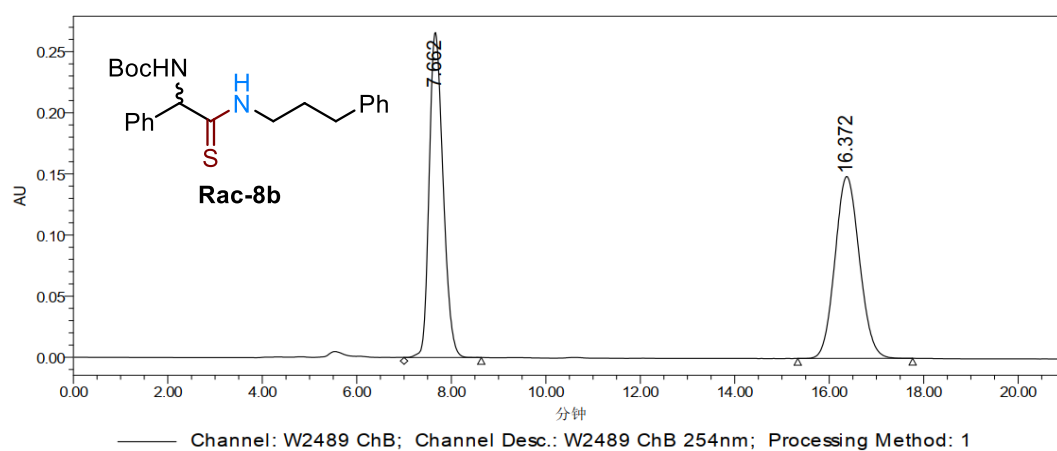

|   | Channel Description | RT (min) | Area (礦*sec) | % Area | Height (礦) |
|---|---------------------|----------|--------------|--------|------------|
| 1 | W2489 ChB 254nm     | 7.662    | 5414338      | 50.28  | 265937     |
| 2 | W2489 ChB 254nm     | 16.372   | 5354513      | 49.72  | 148881     |

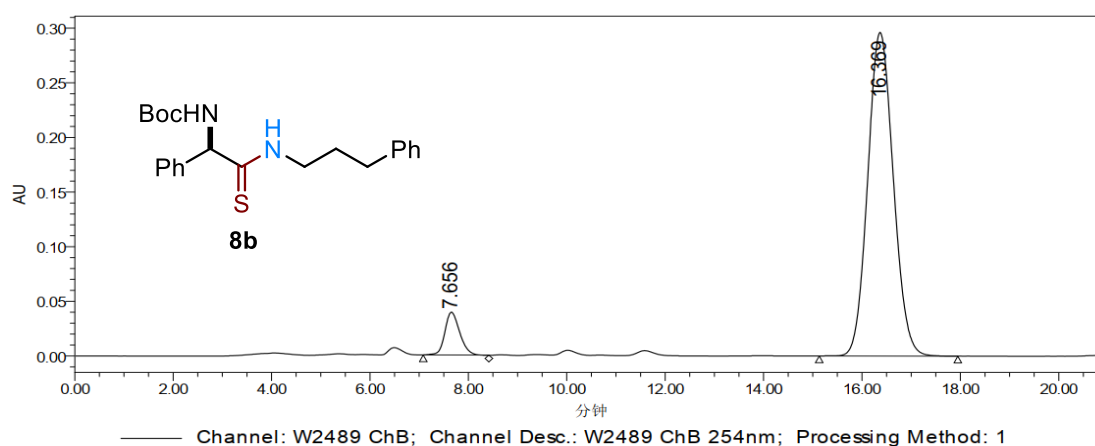

|   | Channel Description | RT (min) | Area (礦*sec) | % Area | Height (礦) |
|---|---------------------|----------|--------------|--------|------------|
| 1 | W2489 ChB 254nm     | 7.656    | 824480       | 7.15   | 39245      |
| 2 | W2489 ChB 254nm     | 16.369   | 10714201     | 92.85  | 296243     |

## SUPPORTING INFORMATION

### **tert-Butyl ((R)-2-((tert-butoxycarbonyl)amino)-4-phenylbutanethioyl)-L-phenylalaninate (10a)**

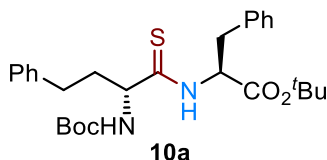

Following procedure B: **10a** was isolated as a yellow oil in 83% yield (41.0 mg; 0.083 mmol) which was purified by silica gel chromatography (PE:EA = 20:1~5:1,  $R_f$  = 0.55 (PE:EA = 5:1)).

$[\alpha]_{25}^D = 25.2$  ( $c = 1.20$ ,  $\text{CHCl}_3$ )

$^1\text{H NMR}$  (400 MHz,  $\text{CDCl}_3$ )  $\delta$  8.26 (s, 1H), 7.34 – 7.04 (m, 11H), 5.25 – 5.12 (m, 2H), 4.46 – 4.26 (m, 1H), 3.25 (q,  $J = 7.8$  Hz, 2H), 2.68 – 2.54 (m, 2H), 2.22 (dq,  $J = 14.3$ , 6.4 Hz, 1H), 1.97 (td,  $J = 14.8$ , 8.7 Hz, 1H), 1.42 (s, 9H), 1.39 (s, 10H).

$^{13}\text{C NMR}$  (101 MHz,  $\text{CDCl}_3$ )  $\delta$  203.9, 169.6, 155.5, 140.9, 135.8, 129.5, 128.6, 128.6, 128.5, 127.2, 126.2, 83.1, 80.3, 60.7, 58.8, 37.5, 36.4, 32.1, 28.4, 28.0.

**HRMS** (ESI): calculated for  $\text{C}_{28}\text{H}_{38}\text{N}_2\text{O}_4\text{SNa}$   $[\text{M}+\text{Na}]^+$  521.2445; found: 521.2446.

**FT-IR** (neat): 3293, 2978, 1729, 1700, 1603, 1512, 1497, 1454, 1367, 1156, 699  $\text{cm}^{-1}$ .

### **tert-Butyl ((R)-2-(((benzyloxy)carbonyl)amino)-4-phenylbutanethioyl)-L-phenylalaninate (10b)**

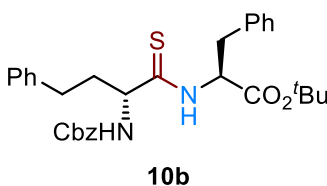

Following procedure B: **10b** was isolated as a yellow oil in 75% yield (40.0 mg; 0.075 mmol) which was purified by silica gel chromatography (PE:EA = 20:1~5:1,  $R_f$  = 0.5 (PE:EA = 5:1)).

$[\alpha]_{25}^D = 23.4$  ( $c = 1.10$ ,  $\text{CHCl}_3$ ).

## SUPPORTING INFORMATION

**<sup>1</sup>H NMR** (400 MHz, CDCl<sub>3</sub>) δ 8.22 (s, 1H), 7.38 – 7.29 (m, 5H), 7.26 – 7.08 (m, 10H), 5.60 (d, *J* = 8.5 Hz, 1H), 5.20 (q, *J* = 6.0 Hz, 1H), 5.15 – 5.00 (m, 2H), 4.56 – 4.42 (m, 1H), 3.37 – 3.14 (m, 2H), 2.66 – 2.54 (m, 2H), 2.17 (q, *J* = 8.0 Hz, 1H), 2.06 – 1.92 (m, 1H), 1.40 (s, 9H).

**<sup>13</sup>C NMR** (101 MHz, CDCl<sub>3</sub>) δ 203.5, 169.6, 156.0, 140.8, 136.3, 135.8, 129.5, 128.7, 128.6, 128.6, 128.5, 128.3, 128.2, 127.3, 126.3, 83.2, 67.2, 61.0, 58.8, 37.7, 36.3, 31.9, 28.0.

**HRMS** (ESI): calculated for C<sub>31</sub>H<sub>36</sub>N<sub>2</sub>O<sub>4</sub>SNa [M+Na]<sup>+</sup> 555.2288; found: 555.2298.

**FT-IR** (neat): 3331, 3294, 2977, 1728, 1708, 1655, 1603, 1510, 1497, 1454, 1422, 1368, 1153, 1096, 1050, 911, 844, 698 cm<sup>-1</sup>.

**tert-Butyl (R)-(2-((tert-butoxycarbonyl)amino)-4-phenylbutanethioyl)glycinate**  
**(10c)**

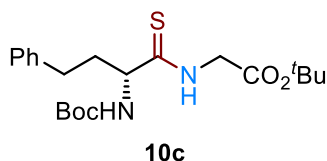

Following procedure B: **10c** was isolated as a yellow oil in 58% yield (23.7 mg; 0.058 mmol) which was purified by silica gel chromatography (PE:EA = 20:1~5:1, *R<sub>f</sub>* = 0.55 (PE:EA = 5:1)).

[α]<sub>D</sub><sup>25</sup> = 17.8 (*c* = 1.30, CHCl<sub>3</sub>).

**<sup>1</sup>H NMR** (400 MHz, CDCl<sub>3</sub>) δ 8.53 (s, 1H), 7.30 – 7.23 (m, 2H), 7.21 – 7.14 (m, 3H), 5.37 (s, 1H), 4.46 (d, *J* = 6.6 Hz, 1H), 4.31 (dd, *J* = 19.0, 4.9 Hz, 1H), 4.16 (d, *J* = 4.7 Hz, 1H), 2.74 – 2.63 (m, 2H), 2.24 (d, *J* = 6.6 Hz, 1H), 2.05 (dt, *J* = 13.7, 7.4 Hz, 1H), 1.47 (s, 9H), 1.44 (s, 9H).

**<sup>13</sup>C NMR** (101 MHz, CDCl<sub>3</sub>) δ 205.0, 167.5, 155.7, 140.9, 128.6, 128.5, 126.2, 83.0, 80.4, 60.4, 47.8, 37.5, 32.2, 28.4, 28.1.

**HRMS** (ESI): calculated for C<sub>21</sub>H<sub>32</sub>N<sub>2</sub>O<sub>4</sub>SNa [M+Na]<sup>+</sup> 431.1975; found: 431.1958.

**FT-IR** (neat): 3270, 2978, 1743, 1688, 1497, 1455, 1367, 1157, 700 cm<sup>-1</sup>.

## SUPPORTING INFORMATION

### **tert-Butyl ((R)-2-((tert-butoxycarbonyl)amino)-4-phenylbutanethioyl)-L-alaninate (10d)**

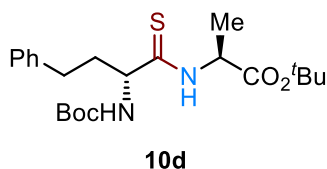

Following procedure B: **10d** was isolated as a light yellow oil in 84% yield (35.4 mg; 0.084 mmol) which was purified by silica gel chromatography (PE:EA = 20:1~5:1,  $R_f$  = 0.5 (PE:EA = 5:1)).

$[\alpha]_{25\text{ D}} = 17.1$  ( $c = 0.90$ ,  $\text{CHCl}_3$ ).

**$^1\text{H}$  NMR** (400 MHz,  $\text{CDCl}_3$ )  $\delta$  8.58 (s, 1H), 7.31 – 7.24 (m, 3H), 7.20 – 7.16 (m, 3H), 5.41 (s, 1H), 4.93 (p,  $J = 7.0$  Hz, 1H), 4.58 – 4.34 (m, 1H), 2.69 (dt,  $J = 16.5, 8.1$  Hz, 2H), 2.21 (s, 1H), 2.04 (tt,  $J = 14.0, 7.1$  Hz, 1H), 1.49 – 1.45 (m, 12H), 1.44 (s, 9H).

**$^{13}\text{C}$  NMR** (101 MHz,  $\text{CDCl}_3$ )  $\delta$  203.8, 171.2, 155.6, 141.0, 128.6, 128.5, 126.2, 82.7, 80.3, 60.4, 53.8, 37.5, 32.2, 28.4, 28.0, 16.9.

**HRMS** (ESI): calculated for  $\text{C}_{22}\text{H}_{34}\text{N}_2\text{O}_4\text{SNa}$   $[\text{M}+\text{Na}]^+$  445.2132; found: 445.2123.

**FT-IR** (neat): 3301, 2976, 1740, 1698, 1603, 1555, 1503, 1454, 1366, 1164, 701  $\text{cm}^{-1}$ .

### **tert-Butyl S-benzyl-N-((R)-2-((tert-butoxycarbonyl)amino)-4-phenylbutanethioyl)-L-cysteinate (10e)**

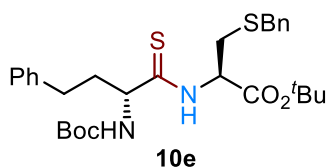

Following procedure B: **10e** was isolated as a yellow oil in 62% yield (33.7 mg; 0.062 mmol) which was purified by silica gel chromatography (PE:EA = 20:1~5:1,  $R_f$  = 0.6 (PE:EA = 5:1)).

$[\alpha]_{25\text{ D}} = 5.6$  ( $c = 0.80$ ,  $\text{CHCl}_3$ ).



## SUPPORTING INFORMATION

**<sup>1</sup>H NMR** (400 MHz, CDCl<sub>3</sub>) δ 8.46 (s, 1H), 7.71 – 7.63 (m, 1H), 7.47 (ddd, *J* = 8.4, 6.7, 3.0 Hz, 1H), 7.28 (d, *J* = 4.0 Hz, 5H), 7.25 – 7.15 (m, 4H), 5.17 (dd, *J* = 13.3, 8.3 Hz, 2H), 4.43 (s, 1H), 3.70 (d, *J* = 1.9 Hz, 2H), 3.18 (dd, *J* = 13.7, 4.9 Hz, 1H), 2.91 (dd, *J* = 13.7, 5.2 Hz, 1H), 2.70 (t, *J* = 7.9 Hz, 2H), 2.36 – 2.21 (m, 1H), 2.04 (dq, *J* = 15.3, 7.9 Hz, 1H), 1.45 (d, *J* = 7.1 Hz, 18H).

**<sup>13</sup>C NMR** (101 MHz, CDCl<sub>3</sub>) δ 204.4, 168.7, 137.7, 132.3, 132.2, 132.1, 129.1, 128.7, 128.5, 127.3, 126.3, 83.5, 80.4, 61.0, 57.4, 37.3, 36.9, 32.1, 31.9, 29.8, 28.4, 28.0.

**HRMS** (ESI): calculated for C<sub>29</sub>H<sub>40</sub>N<sub>2</sub>O<sub>4</sub>S<sub>2</sub>Na [M+Na]<sup>+</sup> 567.2322; found: 567.2326.

**FT-IR** (neat): 3392, 3327, 2976, 1739, 1699, 1602, 1553, 1496, 1454, 1391, 1367, 1165, 1120, 1048, 1028, 913, 699 cm<sup>-1</sup>.

**tert-Butyl ((R)-2-((tert-butoxycarbonyl)amino)-4-phenylbutanethioyl)-L-methioninate (10f)**

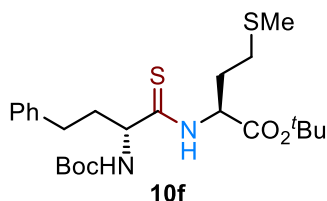

Following procedure B: **10f** was isolated as a light yellow oil in 74% yield (35.6 mg; 0.074 mmol) which was purified by silica gel chromatography (PE:EA = 20:1~5:1, *R<sub>f</sub>* = 0.5 (PE:EA = 5:1)).

[α]<sub>D</sub><sup>25</sup> = 30.6 (*c* = 1.60, CHCl<sub>3</sub>).

**<sup>1</sup>H NMR** (400 MHz, CDCl<sub>3</sub>) δ 8.61 (s, 1H), 7.32 – 7.27 (m, 2H), 7.21 – 7.16 (m, 3H), 5.23 (d, *J* = 7.7 Hz, 1H), 5.12 – 5.03 (m, 1H), 4.42 (s, 1H), 2.74 – 2.62 (m, 2H), 2.50 (ddd, *J* = 8.2, 6.6, 3.0 Hz, 2H), 2.38 – 2.23 (m, 2H), 2.20 – 2.10 (m, 1H), 2.08 (s, 3H), 2.07 – 1.99 (m, 1H), 1.48 (s, 9H), 1.44 (s, 9H).

**<sup>13</sup>C NMR** (101 MHz, CDCl<sub>3</sub>) δ 204.1, 169.9, 155.5, 140.8, 128.7, 128.5, 126.3, 83.2, 80.5, 61.0, 57.4, 37.1, 32.2, 30.4, 29.7, 28.4, 28.1, 15.6.

**HRMS** (ESI): calculated for C<sub>24</sub>H<sub>38</sub>N<sub>2</sub>O<sub>4</sub>S<sub>2</sub>Na [M+Na]<sup>+</sup> 505.2165; found: 505.2160.

## SUPPORTING INFORMATION

**FT-IR** (neat): 3295, 2977, 1724, 1698, 1553, 1497, 1453, 1367, 1158, 699  $\text{cm}^{-1}$ .

**tert-Butyl ((R)-2-((tert-butoxycarbonyl)amino)-4-phenylbutanethioyl)-L-leucinate**  
**(10g)**

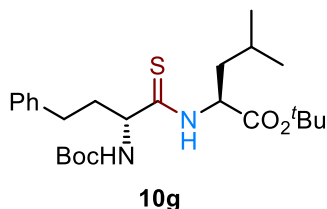

Following procedure B: **10g** was isolated as a yellow oil in 78% yield (36.2 mg; 0.078 mmol) which was purified by silica gel chromatography (PE:EA = 20:1~5:1,  $R_f$  = 0.45 (PE:EA = 5:1)).

$[\alpha]_{25}^D = 13.6$  ( $c$  = 1.00,  $\text{CHCl}_3$ ).

**$^1\text{H}$  NMR** (400 MHz,  $\text{CDCl}_3$ )  $\delta$  8.49 (s, 1H), 7.31 – 7.24 (m, 2H), 7.22 – 7.15 (m, 3H), 5.31 (s, 1H), 5.02 – 4.94 (m, 1H), 4.43 (d,  $J$  = 7.7 Hz, 1H), 2.76 – 2.58 (m, 2H), 2.25 (d,  $J$  = 14.0 Hz, 1H), 2.11 – 1.98 (m, 1H), 1.77 – 1.68 (m, 2H), 1.44 (d,  $J$  = 8.5 Hz, 18H), 0.95 (dd,  $J$  = 12.1, 6.3 Hz, 6H).

**$^{13}\text{C}$  NMR** (101 MHz,  $\text{CDCl}_3$ )  $\delta$  204.1, 170.8, 155.6, 141.0, 128.6, 128.5, 126.2, 82.5, 80.4, 60.9, 57.0, 40.4, 37.0, 32.2, 28.4, 28.1, 25.1, 22.7, 22.5.

**HRMS** (ESI): calculated for  $\text{C}_{25}\text{H}_{40}\text{N}_2\text{O}_4\text{SNa}$   $[\text{M}+\text{Na}]^+$  487.2601; found: 487.2603.

**FT-IR** (neat): 3304, 2976, 1727, 1697, 1553, 1497, 1454, 1367, 1159, 699  $\text{cm}^{-1}$ .

**tert-Butyl ((R)-2-((tert-butoxycarbonyl)amino)-4-phenylbutanethioyl)-L-alloisoleucinate**  
**(10h)**

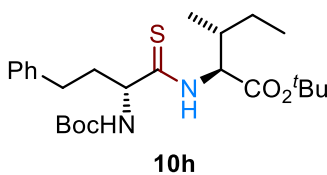

## SUPPORTING INFORMATION

Following procedure B: **10h** was isolated as a yellow oil in 72% yield (33.4 mg; 0.072 mmol) which was purified by silica gel chromatography (PE:EA = 20:1~5:1,  $R_f$  = 0.55 (PE:EA = 5:1)).

$[\alpha]_{25}^D = 7.6$  ( $c$  = 0.80,  $\text{CHCl}_3$ ).

**$^1\text{H}$  NMR** (400 MHz,  $\text{CDCl}_3$ )  $\delta$  8.49 (s, 1H), 7.31 – 7.25 (m, 2H), 7.19 (td,  $J$  = 7.2, 1.4 Hz, 3H), 5.21 (s, 1H), 5.06 – 4.98 (m, 1H), 4.40 (s, 1H), 2.77 – 2.61 (m, 2H), 2.33 (dd,  $J$  = 14.2, 6.1 Hz, 1H), 2.18 – 1.98 (m, 2H), 1.64 – 1.52 (m, 1H), 1.48 (s, 9H), 1.44 (s, 9H), 1.36 – 1.20 (m, 2H), 0.98 (t,  $J$  = 7.4 Hz, 3H), 0.90 (d,  $J$  = 6.9 Hz, 3H).

**$^{13}\text{C}$  NMR** (101 MHz,  $\text{CDCl}_3$ )  $\delta$  203.5, 169.7, 155.5, 140.9, 128.6, 128.5, 126.3, 82.8, 80.5, 61.7, 61.1, 37.2, 37.0, 32.2, 28.4, 28.2, 26.3, 15.2, 11.9.

**HRMS** (ESI): calculated for  $\text{C}_{25}\text{H}_{41}\text{N}_2\text{O}_4\text{S}$   $[\text{M}+\text{H}]^+$  465.2782; found: 465.2773.

**FT-IR** (neat): 3310, 2974, 1724, 1701, 1497, 1454, 1366, 1159, 699  $\text{cm}^{-1}$ .

### ***tert*-Butyl ((*R*)-2-((*tert*-butoxycarbonyl)amino)-4-phenylbutanethioyl)-*L*-valinate** **(10i)**

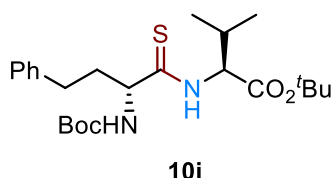

Following procedure B: **10i** was isolated as a yellow oil in 68% yield (30.6 mg; 0.068 mmol) which was purified by silica gel chromatography (PE:EA = 20:1~5:1,  $R_f$  = 0.55 (PE:EA = 5:1)).

$[\alpha]_{25}^D = 29.6$  ( $c$  = 1.30,  $\text{CHCl}_3$ ).

**$^1\text{H}$  NMR** (400 MHz,  $\text{CDCl}_3$ )  $\delta$  8.52 (s, 1H), 7.28 (td,  $J$  = 5.4, 2.5 Hz, 2H), 7.19 (td,  $J$  = 6.3, 1.8 Hz, 3H), 5.25 (d,  $J$  = 8.5 Hz, 1H), 4.96 (dd,  $J$  = 8.0, 4.1 Hz, 1H), 4.43 (s, 1H), 2.36 (ddt,  $J$  = 14.8, 12.4, 7.4 Hz, 2H), 2.14 – 1.98 (m, 1H), 1.48 (s, 9H), 1.44 (s, 9H), 1.03 (d,  $J$  = 6.9 Hz, 3H), 0.95 (d,  $J$  = 6.9 Hz, 3H).

**$^{13}\text{C}$  NMR** (101 MHz,  $\text{CDCl}_3$ )  $\delta$  204.2, 169.7, 155.6, 140.9, 128.6, 128.5, 126.3, 82.7, 80.4, 62.8, 61.2, 37.0, 32.2, 30.9, 28.4, 28.2, 18.7, 18.4.

## SUPPORTING INFORMATION

**HRMS** (ESI): calculated for  $C_{24}H_{38}N_2O_4SNa$   $[M+Na]^+$  473.2445; found: 473.2452.

**FT-IR** (neat): 3311, 2976, 1735, 1701, 1497, 1454, 1366, 1158, 702  $cm^{-1}$ .

**tert-Butyl ((R)-2-((tert-butoxycarbonyl)amino)-4-phenylbutanethioyl)-L-tyrosinate (10j)**

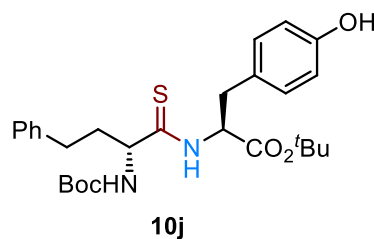

Following procedure B: **10j** was isolated as a yellow oil in 63% yield (32.4 mg; 0.063 mmol) which was purified by silica gel chromatography (PE:EA = 20:1~5:1,  $R_f$  = 0.3 (PE:EA = 5:1)).

$[\alpha]_{25}^D = 15.8$  ( $c$  = 1.00,  $CHCl_3$ ).

**$^1H$  NMR** (400 MHz,  $CDCl_3$ )  $\delta$  8.39 (s, 1H), 7.25 (d,  $J$  = 14.6 Hz, 2H), 7.20 – 7.09 (m, 3H), 6.99 – 6.94 (m, 2H), 6.68 (d,  $J$  = 8.5 Hz, 2H), 5.39 (d,  $J$  = 8.5 Hz, 1H), 5.17 (q,  $J$  = 6.7 Hz, 1H), 4.41 (s, 1H), 3.25 – 3.08 (m, 2H), 2.59 (s, 2H), 2.22 (dq,  $J$  = 15.1, 7.7 Hz, 1H), 1.96 (p,  $J$  = 8.8 Hz, 1H), 1.44 (s, 9H), 1.41 (s, 9H).

**$^{13}C$  NMR** (101 MHz,  $CDCl_3$ )  $\delta$  203.9, 170.0, 155.7, 155.4, 140.9, 130.6, 128.6, 128.5, 127.1, 126.2, 115.7, 83.2, 80.6, 60.6, 59.1, 37.5, 35.6, 32.1, 28.4, 28.1.

**HRMS** (ESI): calculated for  $C_{28}H_{38}N_2O_5SNa$   $[M+Na]^+$  537.2394; found: 537.2392.

**FT-IR** (neat): 3334, 2978, 1724, 1698, 1614, 1515, 1454, 1367, 1156, 700  $cm^{-1}$ .

**tert-Butyl (S)-3-(4-(tert-butoxy)phenyl)-2-((R)-2-((tert-butoxycarbonyl)amino)-4-phenylbutanethioamido)propanoate (10k)**

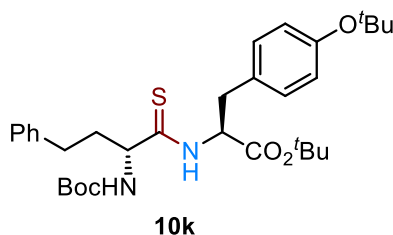

## SUPPORTING INFORMATION

Following procedure B: **10k** was isolated as a yellow oil in 75% yield (42.3 mg; 0.075 mmol) which was purified by silica gel chromatography (PE:EA = 20:1~5:1,  $R_f$  = 0.5 (PE:EA = 5:1)).

$[\alpha]_{25}^{D=}$  12.4 ( $c$  = 1.50,  $\text{CHCl}_3$ ).

$^1\text{H NMR}$  (400 MHz,  $\text{CDCl}_3$ )  $\delta$  8.33 (s, 1H), 7.30 – 7.26 (m, 2H), 7.21 – 7.14 (m, 3H), 7.08 – 7.03 (m, 2H), 6.89 – 6.85 (m, 2H), 5.25 (d,  $J$  = 7.4 Hz, 1H), 5.21 – 5.13 (m, 1H), 4.40 (s, 1H), 3.20 (t,  $J$  = 4.8 Hz, 2H), 2.68 (dt,  $J$  = 22.3, 8.0 Hz, 2H), 2.35 – 2.17 (m, 1H), 2.06 – 1.76 (m, 2H), 1.44 (s, 9H), 1.37 (s, 9H), 1.30 (s, 9H).

$^{13}\text{C NMR}$  (101 MHz,  $\text{CDCl}_3$ )  $\delta$  203.8, 169.7, 154.5, 140.9, 130.7, 130.0, 128.7, 128.6, 128.5, 126.5, 126.2, 124.3, 83.1, 80.4, 78.5, 60.6, 59.0, 37.5, 35.9, 32.1, 28.9, 28.4, 28.0.

**HRMS** (ESI): calculated for  $\text{C}_{32}\text{H}_{46}\text{N}_2\text{O}_5\text{SNa}$   $[\text{M}+\text{Na}]^+$  593.3020; found: 593.3026.

**FT-IR** (neat): 3326, 2977, 1718, 1701, 1607, 1554, 1506, 1454, 1366, 1160, 700  $\text{cm}^{-1}$ .

### Methyl ((*R*)-2-((*tert*-butoxycarbonyl)amino)-4-phenylbutanethioyl)-*L*-tryptophanate (**10l**)

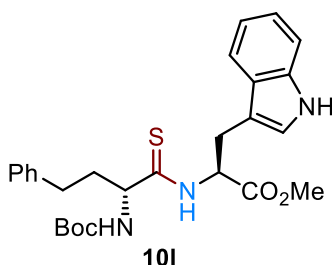

Following procedure B: **10l** was isolated as a yellow oil in 58% yield (28.7 mg; 0.058 mmol) which was purified by silica gel chromatography (PE:EA = 20:1~5:1,  $R_f$  = 0.35 (PE:EA = 5:1)).

$[\alpha]_{25}^{D=}$  39.2 ( $c$  = 1.60,  $\text{CHCl}_3$ ).

$^1\text{H NMR}$  (400 MHz,  $\text{CDCl}_3$ )  $\delta$  8.39 (s, 1H), 8.08 (s, 1H), 7.31 (d,  $J$  = 8.0 Hz, 1H), 7.27 – 7.21 (m, 3H), 7.21 – 7.14 (m, 2H), 7.10 – 7.03 (m, 3H), 6.97 (d,  $J$  = 2.5 Hz, 1H), 5.44 – 5.36 (m, 1H), 5.21 (d,  $J$  = 8.2 Hz, 1H), 4.36 (s, 1H), 3.67 (s, 3H), 3.53 (d,  $J$  = 13.2

## SUPPORTING INFORMATION

Hz, 1H), 3.41 (dd,  $J = 14.8, 5.8$  Hz, 1H), 2.66 – 2.45 (m, 2H), 2.13-2.19 (m, 1H), 1.96 (s, 1H), 1.40 (s, 9H).

$^{13}\text{C}$  NMR (101 MHz,  $\text{CDCl}_3$ )  $\delta$  204.4, 171.4, 155.6, 140.9, 136.2, 128.6, 128.5, 127.4, 126.2, 123.1, 122.5, 119.9, 118.5, 111.4, 109.4, 80.4, 60.5, 58.1, 52.7, 37.2, 31.9, 28.4, 26.4.

HRMS (ESI): calculated for  $\text{C}_{27}\text{H}_{33}\text{N}_3\text{O}_4\text{SNa}$   $[\text{M}+\text{Na}]^+$  518.2084; found: 518.2078.

FT-IR (neat): 3325, 2976, 1731, 1692, 1502, 1454, 1366, 1164, 700  $\text{cm}^{-1}$ .

### 1-(*tert*-Butyl) 4-methyl ((*R*)-2-((*tert*-butoxycarbonyl)amino)-4-phenylbutanethio-yl)-*L*-aspartate (10m)

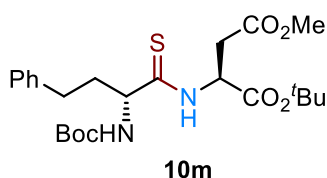

Following procedure B: **10m** was isolated as a yellow oil in 73% yield (35.1 mg; 0.073 mmol) which was purified by silica gel chromatography (PE:EA = 20:1~5:1,  $R_f = 0.5$  (PE:EA = 5:1)).

$[\alpha]_{25}^D = 8.2$  ( $c = 1.00$ ,  $\text{CHCl}_3$ ).

$^1\text{H}$  NMR (400 MHz,  $\text{CDCl}_3$ )  $\delta$  8.65 (d,  $J = 5.8$  Hz, 1H), 7.33 – 7.26 (m, 2H), 7.21 – 7.15 (m, 3H), 5.30 – 5.15 (m, 2H), 4.43 (s, 1H), 3.64 (s, 3H), 3.08 (qd,  $J = 17.0, 4.3$  Hz, 2H), 2.76 – 2.55 (m, 2H), 2.25 (ddt,  $J = 13.7, 9.9, 5.9$  Hz, 1H), 2.12 – 1.95 (m, 1H), 1.47 (s, 9H), 1.44 (s, 9H).

$^{13}\text{C}$  NMR (101 MHz,  $\text{CDCl}_3$ )  $\delta$  203.9, 171.2, 168.6, 155.2, 140.8, 128.6, 128.5, 126.3, 83.4, 80.4, 61.1, 54.1, 52.1, 37.4, 34.6, 32.0, 28.4, 28.0.

HRMS (ESI): calculated for  $\text{C}_{24}\text{H}_{36}\text{N}_2\text{O}_6\text{SNa}$   $[\text{M}+\text{Na}]^+$  503.2186; found: 503.2185.

FT-IR (neat): 3305, 2978, 1739, 1700, 1557, 1497, 1436, 1367, 1160, 701  $\text{cm}^{-1}$ .

### Diethyl ((*R*)-2-((*tert*-butoxycarbonyl)amino)-4-phenylbutanethioyl)-*L*-glutamate (10n)

## SUPPORTING INFORMATION

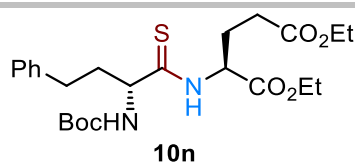

Following procedure B: **10n** was isolated as a light yellow oil in 64% yield (30.7 mg; 0.064 mmol) which was purified by silica gel chromatography (PE:EA = 20:1~5:1,  $R_f$  = 0.4 (PE:EA = 5:1)).

$[\alpha]_{25\text{ D}} = 25.6$  ( $c = 2.40$ ,  $\text{CHCl}_3$ ).

**$^1\text{H}$  NMR** (400 MHz,  $\text{CDCl}_3$ )  $\delta$  8.76 (s, 1H), 7.31 – 7.25 (m, 2H), 7.19 (td,  $J = 5.9, 1.8$  Hz, 3H), 5.28 (d,  $J = 8.0$  Hz, 1H), 5.10 (td,  $J = 7.1, 5.1$  Hz, 1H), 4.44 (d,  $J = 6.0$  Hz, 1H), 4.21 (qd,  $J = 7.1, 2.2$  Hz, 2H), 4.11 (qd,  $J = 7.1, 1.4$  Hz, 2H), 2.78 – 2.61 (m, 2H), 2.51 – 2.12 (m, 5H), 2.06 (h,  $J = 8.5$  Hz, 1H), 1.44 (s, 9H), 1.26 (dt,  $J = 20.9, 7.1$  Hz, 6H).

**$^{13}\text{C}$  NMR** (101 MHz,  $\text{CDCl}_3$ )  $\delta$  204.9, 172.9, 170.6, 155.6, 140.9, 128.6, 128.5, 126.3, 80.4, 70.1, 62.0, 61.0, 57.0, 39.8, 37.0, 32.1, 30.2, 28.4, 26.1, 14.2.

**HRMS** (ESI): calculated for  $\text{C}_{24}\text{H}_{36}\text{N}_2\text{O}_6\text{SNa}$   $[\text{M}+\text{Na}]^+$  503.2186; found: 503.2193.

**FT-IR** (neat): 3303, 2983, 1736, 1700, 1497, 1453, 1367, 1166, 701  $\text{cm}^{-1}$ .

### **tert-Butyl ((R)-2-((tert-butoxycarbonyl)amino)-4-phenylbutanethiophenyl)-L-glutamate (10o)**

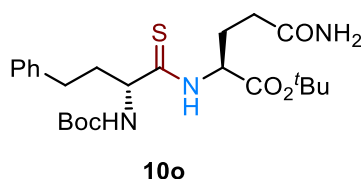

Following procedure B: **10o** was isolated as a light yellow oil in 88% yield (42.2 mg; 0.088 mmol) which was purified by silica gel chromatography (PE:EA = 10:1~1:1,  $R_f$  = 0.3 (PE:EA = 1:1)).

$[\alpha]_{25\text{ D}} = 7.6$  ( $c = 1.20$ ,  $\text{CHCl}_3$ ).

**$^1\text{H}$  NMR** (400 MHz,  $\text{CDCl}_3$ )  $\delta$  8.93 (s, 1H), 7.29 (d,  $J = 8.0$  Hz, 2H), 7.23 – 7.16 (m, 3H), 5.87 (s, 1H), 5.50 (s, 1H), 5.18 (d,  $J = 7.1$  Hz, 1H), 4.95 (q,  $J = 6.3$  Hz, 1H), 4.44

## SUPPORTING INFORMATION

(q,  $J = 7.6$  Hz, 1H), 2.68 (dpd,  $J = 20.6, 13.9, 5.7$  Hz, 2H), 2.39 – 2.14 (m, 5H), 2.04 (dq,  $J = 18.4, 7.2$  Hz, 1H), 1.47 (s, 9H), 1.44 (s, 9H).

$^{13}\text{C}$  NMR (101 MHz,  $\text{CDCl}_3$ )  $\delta$  198.5, 174.5, 169.7, 155.6, 140.8, 128.7, 128.5, 126.3, 83.1, 80.7, 57.6, 37.0, 32.2, 31.4, 29.8, 28.4, 28.1, 26.6.

HRMS (ESI): calculated for  $\text{C}_{24}\text{H}_{38}\text{N}_3\text{O}_5\text{S}$   $[\text{M}+\text{H}]^+$  480.2527; found: 480.2525.

FT-IR (neat): 3331, 2977, 1724, 1704, 1682, 1669, 1655, 1558, 1520, 1506, 1456, 1393, 1367, 1161, 1046, 913, 697  $\text{cm}^{-1}$ .

### **tert-Butyl ((R)-2-((tert-butoxycarbonyl)amino)-4-phenylbutanethioyl)-L-serinate (10p)**

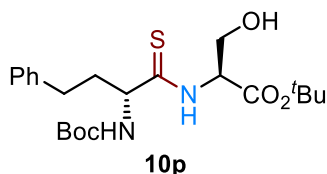

Following procedure B: **10p** was isolated as a yellow oil in 67% yield (29.3 mg; 0.067 mmol) which was purified by silica gel chromatography (PE:EA= 10:1~1:1,  $R_f$  = 0.4 (PE:EA = 1:1)).

$[\alpha]_{25}^D = 5.6$  ( $c = 1.20$ ,  $\text{CHCl}_3$ ).

$^1\text{H}$  NMR (400 MHz,  $\text{CDCl}_3$ )  $\delta$  8.77 (s, 1H), 7.30 – 7.25 (m, 2H), 7.19 (td,  $J = 6.0, 1.6$  Hz, 3H), 5.28 (s, 1H), 5.06 – 4.98 (m, 1H), 4.51 – 4.39 (m, 1H), 4.24 (s, 1H), 3.97 (d,  $J = 10.2$  Hz, 1H), 2.70 (tt,  $J = 13.7, 6.9$  Hz, 3H), 2.31 (dddd,  $J = 14.3, 9.6, 6.6, 4.9$  Hz, 1H), 2.06 (td,  $J = 14.6, 9.1$  Hz, 1H), 1.49 (s, 9H), 1.43 (s, 9H).

$^{13}\text{C}$  NMR (101 MHz,  $\text{CDCl}_3$ )  $\delta$  203.8, 168.8, 156.0, 140.7, 128.7, 128.5, 126.3, 83.4 (2C), 80.9, 61.5, 60.0, 36.9, 32.2, 28.3, 28.1.

HRMS (ESI): calculated for  $\text{C}_{22}\text{H}_{34}\text{N}_2\text{O}_5\text{SNa}$   $[\text{M}+\text{Na}]^+$  461.2081; found: 461.2085.

FT-IR (neat): 3304, 2978, 1727, 1697, 1498, 1454, 1368, 1159, 699  $\text{cm}^{-1}$ .

### **tert-Butyl ((R)-2-((tert-butoxycarbonyl)amino)-4-phenylbutanethioyl)-L-histidin-ate (10q)**



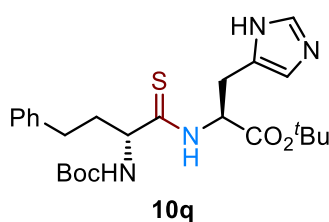

Following procedure B: **10q** was isolated as a yellow oil in 43% yield (21.0 mg; 0.043 mmol) which was purified by silica gel chromatography (PE:EA = 20:1~5:1,  $R_f$  = 0.2 (PE:EA = 5:1)).

$[\alpha]_{25}^D = 28.4$  ( $c$  = 1.00,  $\text{CHCl}_3$ ).

$^1\text{H NMR}$  (400 MHz,  $\text{CDCl}_3$ )  $\delta$  9.50 (s, 1H), 7.45 (s, 1H), 7.30 – 7.27 (m, 1H), 7.26 (d,  $J$  = 1.8 Hz, 1H), 7.21 – 7.16 (m, 3H), 6.79 (s, 1H), 5.37 (d,  $J$  = 7.7 Hz, 1H), 5.17 – 5.05 (m, 1H), 4.46 (td,  $J$  = 8.2, 4.9 Hz, 1H), 3.36 (d,  $J$  = 11.3 Hz, 1H), 3.17 (dd,  $J$  = 15.2, 5.4 Hz, 1H), 2.68 (dddd,  $J$  = 23.6, 13.7, 9.8, 5.8 Hz, 2H), 2.42 – 2.28 (m, 1H), 2.08 (s, 1H), 1.43 (s, 9H), 1.40 (s, 9H).

$^{13}\text{C NMR}$  (101 MHz,  $\text{CDCl}_3$ )  $\delta$  203.8, 175.2, 169.1, 155.9, 140.9, 135.3, 128.6, 128.5, 126.2, 118.4, 82.8, 80.6, 61.7, 58.3, 37.3, 32.1, 28.4, 28.0, 21.8.

**HRMS** (ESI): calculated for  $\text{C}_{25}\text{H}_{36}\text{N}_4\text{O}_4\text{SNa}$   $[\text{M}+\text{Na}]^+$  511.2350; found: 511.2348.

**FT-IR** (neat): 3218, 2977, 1720, 1705, 1496, 1454, 1467, 1367, 1157, 699  $\text{cm}^{-1}$ .

**tert-Butyl  $N^6$ -((benzyloxy)carbonyl)- $N^2$ -((*R*)-2-((*tert*-butoxycarbonyl)amino)-4-phenylbutanethioyl)-*L*-lysinate (**10r**)**

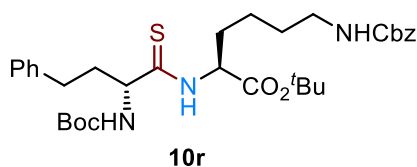

Following procedure B: **10r** was isolated as a yellow oil in 68% yield (41.7 mg; 0.068 mmol) which was purified by silica gel chromatography (PE:EA = 20:1~5:1,  $R_f$  = 0.45 (PE:EA = 5:1)).

$[\alpha]_{25}^D = 9.0$  ( $c$  = 1.50,  $\text{CHCl}_3$ ).

## SUPPORTING INFORMATION

**<sup>1</sup>H NMR** (400 MHz, CDCl<sub>3</sub>) δ 8.56 (s, 1H), 7.37 – 7.23 (m, 7H), 7.21 – 7.13 (m, 3H), 5.25 (t, *J* = 6.9 Hz, 1H), 5.08 (s, 2H), 4.94 (q, *J* = 5.9 Hz, 2H), 4.42 (s, 1H), 3.15 (p, *J* = 6.9 Hz, 2H), 2.67 (dt, *J* = 9.3, 6.0 Hz, 2H), 2.38 – 2.21 (m, 1H), 2.11 – 1.93 (m, 2H), 1.90 – 1.76 (m, 1H), 1.57 – 1.49 (m, 2H), 1.46 (s, 9H), 1.42 (s, 9H), 1.40 – 1.21 (m, 3H).

**<sup>13</sup>C NMR** (101 MHz, CDCl<sub>3</sub>) δ 203.8, 170.4, 156.6, 155.5, 140.9, 136.7, 128.6, 128.6, 128.5, 128.2, 128.2, 126.3, 82.9, 80.5, 66.7, 61.0, 57.7, 40.5, 37.0, 32.2, 30.5, 29.6, 28.4, 28.1, 22.0.

**HRMS** (ESI): calculated for C<sub>33</sub>H<sub>47</sub>N<sub>3</sub>O<sub>6</sub>SNa [M+Na]<sup>+</sup> 636.3078; found: 636.3079.

**FT-IR** (neat): 3314, 2977, 1730, 1701, 1769, 1653, 1521, 1496, 1453, 1366, 1157, 699 cm<sup>-1</sup>.

**tert-Butyl N<sup>2</sup>-((*R*)-2-((tert-butoxycarbonyl)amino)-4-phenylbutanethioyl)-N<sup>4</sup>-(tert-butyl)-L-asparaginate (10s)**

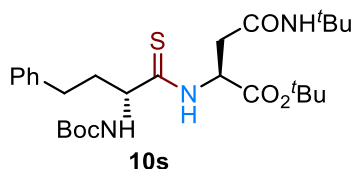

Following procedure B: **10s** was isolated as a yellow oil in 67% yield (34.9 mg; 0.067 mmol) which was purified by silica gel chromatography (PE:EA = 20:1~5:1, *R*<sub>f</sub> = 0.4 (PE:EA = 5:1)).

[α]<sub>D</sub><sup>25</sup> = 11.4 (*c* = 0.90, CHCl<sub>3</sub>).

**<sup>1</sup>H NMR** (400 MHz, CDCl<sub>3</sub>) δ 9.05 (s, 1H), 7.29 – 7.23 (m, 2H), 7.20 – 7.14 (m, 3H), 5.42 (s, 1H), 5.33 (d, *J* = 6.3 Hz, 1H), 5.23 (dt, *J* = 8.0, 4.1 Hz, 1H), 4.49 (s, 1H), 2.86 – 2.75 (m, 2H), 2.74 – 2.56 (m, 2H), 2.29 – 2.16 (m, 1H), 2.06 – 1.96 (m, 1H), 1.46 (s, 9H), 1.43 (s, 9H), 1.28 (s, 9H).

**<sup>13</sup>C NMR** (101 MHz, CDCl<sub>3</sub>) δ 203.6, 169.1, 168.9, 155.1, 141.0, 128.5, 128.5, 126.2, 82.9, 80.1, 61.2, 55.0, 51.7, 38.0, 36.9, 32.1, 28.7, 28.4, 28.0.

**HRMS** (ESI): calculated for C<sub>27</sub>H<sub>43</sub>N<sub>3</sub>O<sub>5</sub>SNa [M+Na]<sup>+</sup> 544.2816; found: 544.2826.

## SUPPORTING INFORMATION

**FT-IR** (neat): 3339, 2976, 1730, 1703, 1662, 1511, 1454, 1366, 1161, 699  $\text{cm}^{-1}$ .

**Methyl ((R)-2-((tert-butoxycarbonyl)amino)-4-phenylbutanethioyl)-L-phenylalaninate (10t)**

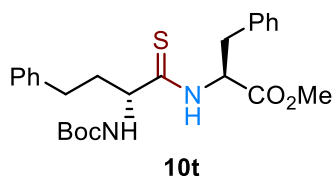

Following procedure B: **10t** was isolated as a yellow oil in 73% yield (33.3 mg; 0.073 mmol) which was purified by silica gel chromatography (PE:EA = 20:1~5:1,  $R_f$  = 0.55 (PE:EA = 5:1)).

$[\alpha]_{25\text{ D}} = 18.6$  ( $c$  = 0.90,  $\text{CHCl}_3$ ).

**$^1\text{H}$  NMR** (400 MHz,  $\text{CDCl}_3$ )  $\delta$  8.28 (s, 1H), 7.32 – 7.16 (m, 7H), 7.15 – 7.06 (m, 4H), 5.37 (q,  $J$  = 5.9 Hz, 1H), 5.17 (d,  $J$  = 6.5 Hz, 1H), 4.43 – 4.31 (m, 1H), 3.73 (s, 3H), 3.36 (dd,  $J$  = 13.8, 5.1 Hz, 1H), 3.20 (dd,  $J$  = 14.0, 5.7 Hz, 1H), 2.68 – 2.52 (m, 2H), 2.27 – 2.15 (m, 1H), 1.98 (dt,  $J$  = 14.0, 7.1 Hz, 1H), 1.43 (s, 9H).

**$^{13}\text{C}$  NMR** (101 MHz,  $\text{CDCl}_3$ )  $\delta$  204.6, 171.0, 155.6, 140.8, 135.4, 129.3, 128.8, 128.6, 128.5, 127.4, 126.2, 60.6, 58.4, 52.6, 37.3, 36.5, 32.0, 29.8, 28.4.

**HRMS** (ESI): calculated for  $\text{C}_{25}\text{H}_{33}\text{N}_2\text{O}_4\text{S}$   $[\text{M}+\text{H}]^+$  457.2156; found: 457.2186.

**FT-IR** (neat): 3295, 2976, 1740, 1701, 1603, 1496, 1454, 1437, 1366, 1169, 1047, 700  $\text{cm}^{-1}$ .

**tert-Butyl ((R)-2-((tert-butoxycarbonyl)amino)-4-phenylbutanethioyl)-L-prolinate (10u)**

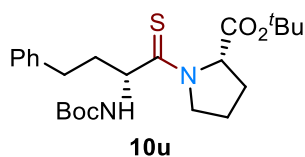

## SUPPORTING INFORMATION

Following procedure B: **10u** was isolated as a yellow oil in 82% yield (36.8 mg; 0.082 mmol) which was purified by silica gel chromatography (PE:EA = 20:1~5:1,  $R_f$  = 0.45 (PE:EA = 5:1)).

$[\alpha]_{25}^D = 14.1$  ( $c = 2.00$ ,  $\text{CHCl}_3$ ).

A mixture of two stereoisomers A and B in approximately 5.6:1 ratio.

**$^1\text{H}$  NMR** (400 MHz,  $\text{CDCl}_3$ )  $\delta$  **major rotamer**: 7.32 – 7.13 (m, 5H), 5.63 (dd,  $J = 22.2$ , 9.4 Hz, 1H), 4.83 – 4.61 (m, 1H), 3.96 – 3.65 (m, 1H), 3.48 – 3.16 (m, 1H), 2.84 – 2.53 (m, 2H), 2.36 – 1.86 (m, 6H), 1.46 (d,  $J = 3.8$  Hz, 9H), 1.43 (d,  $J = 1.9$  Hz, 9H).

**$^{13}\text{C}$  NMR** (101 MHz,  $\text{CDCl}_3$ ) **major rotamer**:  $\delta$  202.6, 169.1, 155.4, 141.3, 128.7, 128.6, 126.2, 81.9, 79.7, 66.4, 55.8, 50.6, 38.5, 32.0, 29.0, 28.5, 28.0, 24.4.

**HRMS** (ESI): calculated for  $\text{C}_{24}\text{H}_{36}\text{N}_2\text{O}_4\text{SNa}$   $[\text{M}+\text{Na}]^+$  471.2288; found: 471.2283.

**FT-IR** (neat): 3000, 2979, 1737, 1711, 1498, 1469, 1452, 1366, 1153, 704  $\text{cm}^{-1}$ .

### **tert-Butyl ((R)-2-((tert-butoxycarbonyl)amino)-3-methylbutanethioyl)-L-tyrosinate (10v)**

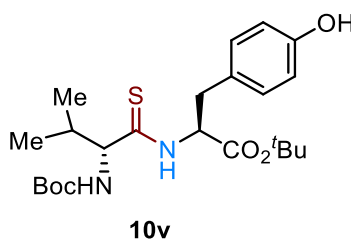

Following procedure B: **10v** was isolated as a yellow oil in 59% yield (26.7 mg; 0.059 mmol) which was purified by silica gel chromatography (PE:EA = 20:1~5:1,  $R_f$  = 0.5 (PE:EA = 5:1)).

$[\alpha]_{25}^D = 8.1$  ( $c = 1.60$ ,  $\text{CHCl}_3$ ).

**$^1\text{H}$  NMR** (400 MHz,  $\text{CDCl}_3$ )  $\delta$  8.21 (s, 1H), 7.03 – 6.98 (m, 2H), 6.75 – 6.69 (m, 2H), 5.21 (dt,  $J = 13.2$ , 7.7 Hz, 2H), 4.20 – 4.13 (m, 1H), 3.20 – 3.12 (m, 2H), 2.39 – 2.28 (m, 1H), 1.43 (s, 9H), 1.41 (s, 9H), 0.86 (t,  $J = 7.5$  Hz, 6H).

**$^{13}\text{C}$  NMR** (101 MHz,  $\text{CDCl}_3$ )  $\delta$  203.6, 169.9, 155.9, 155.2, 130.6, 127.4, 115.6, 83.1, 80.4, 66.5, 59.1, 35.8, 33.2, 28.4, 28.0, 19.8, 17.2.

## SUPPORTING INFORMATION

**HRMS** (ESI): calculated for  $C_{23}H_{36}N_2O_5SNa$   $[M+Na]^+$  475.2237; found: 475.2240.

**FT-IR** (neat): 3340, 2980, 1729, 1692, 1515, 1450, 1367, 1156, 843  $cm^{-1}$ .

**tert-Butyl ((R)-2-((tert-butoxycarbonyl)amino)-2-cyclohexylethanethioyl)-L-tyrosinate (10w)**

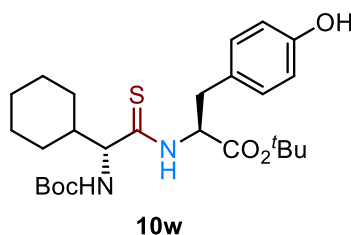

Following procedure B: **10w** was isolated as a yellow oil in 78% yield (38.4 mg; 0.078 mmol) which was purified by silica gel chromatography (PE:EA = 20:1~5:1,  $R_f$  = 0.5 (PE:EA = 5:1)).

$[\alpha]_{25}^D = 17.4$  ( $c$  = 1.00,  $CHCl_3$ ).

**$^1H$  NMR** (400 MHz,  $CDCl_3$ )  $\delta$  8.13 (s, 1H), 7.04 – 6.99 (m, 2H), 6.74 (d,  $J$  = 2.0 Hz, 1H), 6.73 (d,  $J$  = 2.0 Hz, 1H), 5.33 – 5.14 (m, 2H), 4.21 – 4.08 (m, 1H), 3.17 (d,  $J$  = 5.8 Hz, 2H), 1.76 – 1.51 (m, 5H), 1.43 (s, 9H), 1.41 (s, 9H), 1.27 – 1.05 (m, 4H), 0.88 (ddt,  $J$  = 15.0, 11.6, 4.7 Hz, 2H).

**$^{13}C$  NMR** (101 MHz,  $CDCl_3$ )  $\delta$  203.7, 169.8, 155.8, 155.1, 130.6, 127.5, 115.6, 83.1, 80.3, 65.9, 59.1, 42.7, 35.8, 30.1, 28.4, 28.0, 27.8, 26.2, 26.0, 26.0.

**HRMS** (ESI): calculated for  $C_{26}H_{40}N_2O_5SNa$   $[M+Na]^+$  515.2550; found: 515.2552.

**FT-IR** (neat): 3342, 2979, 1724, 1701, 1686, 1513, 1458, 1367, 1156, 844  $cm^{-1}$ .

**tert-Butyl ((R)-2-((tert-butoxycarbonyl)amino)-4-methylpentanethioyl)-L-tyrosinate (10y)**

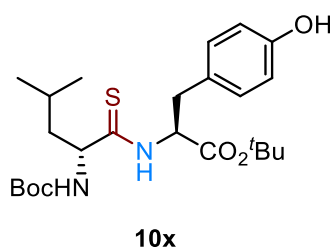

## SUPPORTING INFORMATION

Following procedure B: **10y** was isolated as a yellow oil in 84% yield (39.2 mg; 0.084 mmol) which was purified by silica gel chromatography (PE:EA = 20:1~5:1,  $R_f$  = 0.5 (PE:EA = 5:1)).

$[\alpha]_{25\text{ D}} = 11.4$  ( $c$  = 1.00,  $\text{CHCl}_3$ ).

**$^1\text{H}$  NMR** (400 MHz,  $\text{CDCl}_3$ )  $\delta$  8.30 (s, 1H), 7.00 – 6.95 (m, 2H), 6.73 – 6.68 (m, 2H), 6.13 (s, 1H), 5.21 – 5.04 (m, 2H), 4.40 (td,  $J$  = 8.8, 5.1 Hz, 1H), 3.76 (ddt,  $J$  = 5.8, 4.1, 2.2 Hz, 1H), 3.16 (td,  $J$  = 14.6, 4.7 Hz, 2H), 1.89 – 1.83 (m, 1H), 1.42 (d,  $J$  = 2.5 Hz, 18H), 0.90 (dd,  $J$  = 8.5, 6.3 Hz, 6H).

**$^{13}\text{C}$  NMR** (101 MHz,  $\text{CDCl}_3$ )  $\delta$  204.9, 170.0 (2C), 155.2, 130.6, 127.3, 115.6, 83.2, 68.1, 58.9, 45.0, 35.5, 28.4, 28.1, 25.7, 25.0, 23.0.

**HRMS** (ESI): calculated for  $\text{C}_{24}\text{H}_{37}\text{N}_2\text{O}_5\text{S}$   $[\text{M}-\text{H}]^-$  465.2429; found: 465.2480.

**FT-IR** (neat): 3373, 3322, 2976, 1727, 1690, 1603, 1551, 1495, 1478, 1454, 1392, 1367, 1153, 1078, 1030, 993, 913, 847, 700  $\text{cm}^{-1}$ .

### *tert*-Butyl ((*R*)-2-((*tert*-butoxycarbonyl)amino)-3-phenylpropanethioyl)-*L*-leucinate (**10x**)

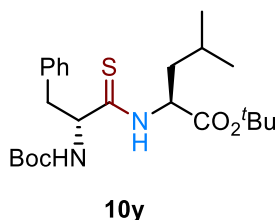

Following procedure B: **10x** was isolated as a yellow oil in 72% yield (32.4 mg; 0.072 mmol) which was purified by silica gel chromatography (PE:EA = 20:1~5:1,  $R_f$  = 0.5 (PE:EA = 5:1)).

$[\alpha]_{25\text{ D}} = 6.8$  ( $c$  = 1.20,  $\text{CHCl}_3$ ).

**$^1\text{H}$  NMR** (400 MHz,  $\text{CDCl}_3$ )  $\delta$  8.07 (s, 1H), 7.31 – 7.18 (m, 6H), 5.32 (s, 1H), 4.91 (dd,  $J$  = 7.8, 4.0 Hz, 1H), 4.60 (q,  $J$  = 6.9 Hz, 1H), 3.18 (d,  $J$  = 7.1 Hz, 2H), 1.91 – 1.78 (m, 1H), 1.73 (d,  $J$  = 3.3 Hz, 1H), 1.45 (s, 9H), 1.41 (s, 9H), 0.92 (t,  $J$  = 7.4 Hz, 3H), 0.58 (d,  $J$  = 6.9 Hz, 3H).

## SUPPORTING INFORMATION

**$^{13}\text{C}$  NMR** (101 MHz,  $\text{CDCl}_3$ )  $\delta$  202.4, 169.5, 155.0, 136.6, 129.3, 128.8, 127.1, 82.8, 80.4, 61.7, 41.8, 37.3, 28.3, 28.2, 26.3, 14.9, 11.8.

**HRMS** (ESI): calculated for  $\text{C}_{24}\text{H}_{38}\text{N}_2\text{O}_4\text{SNa}$   $[\text{M}+\text{Na}]^+$  473.2445; found: 473.2449.

**FT-IR** (neat): 3408, 3292, 2974, 1705, 1604, 1496, 1455, 1435, 1392, 1367, 1160, 1078, 1047, 1024, 844, 700  $\text{cm}^{-1}$ .

**Methyl ((*R*)-2-((tert-butoxycarbonyl)amino)-4-phenylbutanethioyl)-*L*-phenylalanyl- *L*-leucinate (11a)**

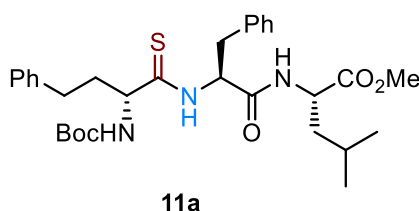

Following procedure B: **11a** was isolated as a yellow oil in 54% yield (30.7 mg; 0.054 mmol) which was purified by silica gel chromatography (PE:EA = 20:1~5:1,  $R_f$  = 0.4 (PE:EA = 5:1)).

$[\alpha]_{25}^D = 35.6$  ( $c$  = 1.40,  $\text{CHCl}_3$ ).

**$^1\text{H}$  NMR** (400 MHz,  $\text{CDCl}_3$ )  $\delta$  8.36 (s, 1H), 7.28 (t,  $J$  = 6.3 Hz, 6H), 7.20 (d,  $J$  = 7.1 Hz, 3H), 7.10 (d,  $J$  = 7.7 Hz, 2H), 6.29 (s, 1H), 5.27 (dd,  $J$  = 20.9, 6.3 Hz, 2H), 4.59 – 4.45 (m, 1H), 4.26 (q,  $J$  = 7.8 Hz, 1H), 3.69 (s, 2H), 3.42 – 3.28 (m, 1H), 3.15 (s, 1H), 2.54 (d,  $J$  = 16.5 Hz, 2H), 2.09 (s, 1H), 2.02 – 1.87 (m, 1H), 1.42 (s, 9H), 1.25 (s, 3H), 0.86 (d,  $J$  = 4.4 Hz, 6H).

**$^{13}\text{C}$  NMR** (101 MHz,  $\text{CDCl}_3$ )  $\delta$  204.2, 172.5, 169.3, 140.7, 136.0, 129.4, 128.9, 128.6, 128.4, 127.4, 126.3, 121.3, 80.4, 61.2, 59.3, 52.4, 51.2, 41.1, 37.2, 36.8, 31.9, 29.8, 28.4, 24.8, 22.8, 21.9.

**HRMS** (ESI): calculated for  $\text{C}_{31}\text{H}_{43}\text{N}_3\text{O}_5\text{SNa}$   $[\text{M}+\text{Na}]^+$  592.2816; found: 592.2820.

**FT-IR** (neat): 3304, 2956, 1743, 1727, 1685, 1510, 1497, 1454, 1437, 1337, 1165, 699  $\text{cm}^{-1}$ .

## SUPPORTING INFORMATION

### **tert-Butyl ((S)-2-((R)-1-((tert-butoxycarbonyl)glycyl)pyrrolidine-2-carboxamido)-4-phenylbutanethioyl)-L-leucinate (11b)**

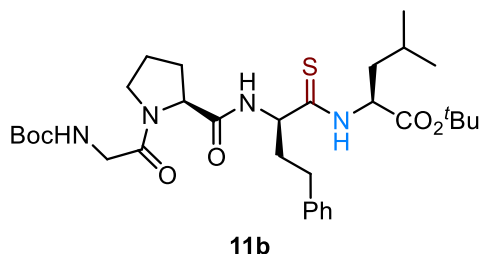

Following procedure B: **11b** was isolated as a yellow oil in 50% yield (30.9 mg; 0.078 mmol) which was purified by silica gel chromatography (DCM:EA = 20:1~5:1,  $R_f$  = 0.5 (DCM:EA = 5:1)).

$[\alpha]_{25}^D = 11.4$  ( $c = 1.20$ ,  $\text{CHCl}_3$ ).

**$^1\text{H}$  NMR** (400 MHz,  $\text{CDCl}_3$ )  $\delta$  8.39 (d,  $J = 7.7$  Hz, 1H), 7.29 (d,  $J = 8.5$  Hz, 2H), 7.20 (d,  $J = 7.7$  Hz, 3H), 5.45 (s, 1H), 4.99 (q,  $J = 6.9$  Hz, 1H), 4.70 (td,  $J = 8.4, 4.5$  Hz, 1H), 4.45 (dd,  $J = 8.0, 3.3$  Hz, 1H), 4.14 – 4.02 (m, 1H), 3.94 – 3.85 (m, 1H), 3.55 (td,  $J = 8.4, 3.7$  Hz, 1H), 3.46 – 3.37 (m, 1H), 2.70 (t,  $J = 7.8$  Hz, 2H), 2.47 (td,  $J = 13.6, 8.0$  Hz, 1H), 2.32 (tt,  $J = 7.1, 3.4$  Hz, 1H), 2.13 (dq,  $J = 14.8, 7.8$  Hz, 2H), 2.02 – 1.89 (m, 2H), 1.80 – 1.57 (m, 3H), 1.47 (s, 9H), 1.44 (s, 9H), 0.92 (dd,  $J = 10.2, 6.3$  Hz, 6H).

**$^{13}\text{C}$  NMR** (101 MHz,  $\text{CDCl}_3$ )  $\delta$  202.6, 171.1, 169.1, 155.8, 141.0, 128.6, 126.2, 82.5, 79.9, 60.4, 59.5, 57.0, 46.4, 43.2, 40.3, 36.4, 32.2, 28.4, 28.1, 27.7, 25.0, 22.8, 22.5.

**HRMS** (ESI): calculated for  $\text{C}_{32}\text{H}_{50}\text{N}_4\text{O}_6\text{SNa}$   $[\text{M}+\text{Na}]^+$  641.3343; found: 641.3366.

**FT-IR** (neat): 3347, 3289, 2976, 1739, 1718, 1653, 1512, 1456, 1367, 1157, 1135, 913, 702  $\text{cm}^{-1}$ .

### **tert-Butyl ((R)-2-((S)-2-((S)-2-(((benzyloxy)carbonyl)amino)-6-((tert-butoxycarbonyl)amino)hexanamido)propanamido)-4-phenylbutanethioyl)-L-leucinate (11c)**



## SUPPORTING INFORMATION

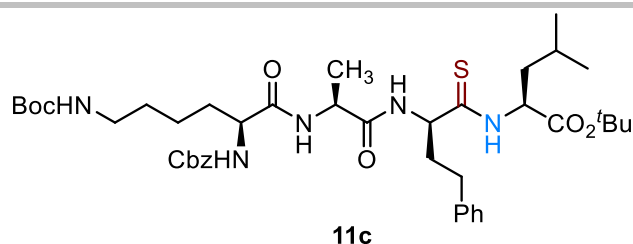

Following procedure B: **11c** was isolated as a yellow oil in 58% yield (46.3 mg; 0.058 mmol) which was purified by silica gel chromatography (DCM:EA = 20:1~5:1,  $R_f$  = 0.5 (DCM:EA = 5:1)).

$[\alpha]_{25}^D = 7.2$  ( $c = 1.00$ ,  $\text{CHCl}_3$ ).

**$^1\text{H}$  NMR** (400 MHz,  $\text{CDCl}_3$ )  $\delta$  7.32 (d,  $J = 3.0$  Hz, 5H), 7.23 (d,  $J = 6.9$  Hz, 2H), 7.16 (t,  $J = 6.9$  Hz, 3H), 5.07 (s, 2H), 4.94 (q,  $J = 7.4$  Hz, 2H), 4.56 (t,  $J = 7.0$  Hz, 1H), 4.35 (s, 1H), 3.05 (dd,  $J = 12.0, 6.2$  Hz, 2H), 2.76 – 2.50 (m, 2H), 2.28 – 1.97 (m, 2H), 1.89 – 1.57 (m, 5H), 1.44 (s, 9H), 1.42 – 1.23 (m, 16H), 0.95 (d,  $J = 6.0$  Hz, 3H), 0.92 (d,  $J = 6.0$  Hz, 3H).

**$^{13}\text{C}$  NMR** (101 MHz,  $\text{CDCl}_3$ )  $\delta$  203.8, 172.0, 171.6, 170.6, 156.6, 141.1, 136.1, 128.6, 128.6, 128.5, 128.3, 128.2, 126.1, 82.3, 79.2, 77.3, 67.3, 58.0, 57.3, 54.9, 49.2, 40.4, 39.7, 37.7, 32.8, 31.9, 29.9, 28.5, 28.1, 25.2, 22.7, 22.4, 19.3.

**HRMS** (ESI): calculated for  $\text{C}_{42}\text{H}_{64}\text{N}_5\text{O}_8\text{S}$   $[\text{M}+\text{H}]^+$  798.4470; found: 798.4498.

**FT-IR** (neat): 3282, 2976, 1733, 1699, 1684, 1637, 1519, 1454, 1392, 1366, 1155, 1135, 1050, 912, 844, 698  $\text{cm}^{-1}$ .

### **$N^6$ -((*S*)-2-((*R*)-2-((tert-butoxycarbonyl)amino)-3-phenylpropanamido)-4-phenylbutanethioyl)- $N^2$ -palmitoylglucyl-*D*-histidyl-*L*-lysine (11d)**

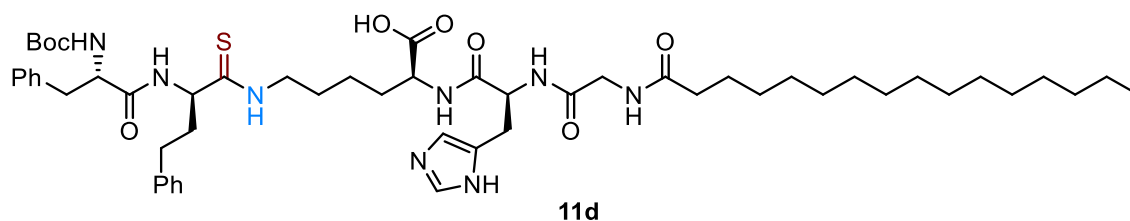

## SUPPORTING INFORMATION

Following procedure B: **11d** was isolated as a yellow oil in 73% yield (36.6 mg; 0.0365 mmol) which was purified by silica gel chromatography (DCM:MeOH = 50:1~5:1,  $R_f$  = 0.3 (DCM:MeOH = 5:1)).

$[\alpha]_{25}^D = 29.4$  ( $c = 1.00$ ,  $\text{CHCl}_3$ ).

**$^1\text{H}$  NMR** (400 MHz,  $\text{DMSO-}d_6$ )  $\delta$  8.22 (s, 1H), 7.45 – 7.32 (m, 2H), 7.25 (q,  $J = 8.1$  Hz, 7H), 7.21 – 7.02 (m, 5H), 6.64 (d,  $J = 25.8$  Hz, 1H), 6.50 (s, 1H), 6.37 (s, 1H), 4.45 (s, 2H), 4.29 (d,  $J = 8.0$  Hz, 1H), 4.25 – 4.01 (m, 2H), 3.87 (s, 1H), 3.69 (dd,  $J = 6.0, 2.5$  Hz, 3H), 3.57 (s, 2H), 3.09 (td,  $J = 7.3, 4.3$  Hz, 2H), 3.04 – 2.68 (m, 6H), 2.56 (d,  $J = 12.4$  Hz, 1H), 2.35 (dd,  $J = 30.5, 9.6$  Hz, 2H), 2.12 (t,  $J = 7.6$  Hz, 3H), 1.99 (p,  $J = 6.9$  Hz, 1H), 1.89 – 1.37 (m, 14H), 1.32 (s, 9H), 1.27 – 1.04 (m, 10H).

**$^{13}\text{C}$  NMR** (101 MHz,  $\text{DMSO-}d_6$ )  $\delta$  202.5, 175.6, 173.1, 172.1, 169.6, 169.1, 163.3, 156.1, 149.7, 141.8, 138.4, 136.9, 130.2, 129.8, 128.8, 128.6, 127.0, 126.3, 78.8, 76.5, 76.5, 66.4, 61.5, 59.7, 57.0, 55.9, 54.8, 51.0, 50.1, 45.6, 42.7, 37.7, 35.5, 32.0, 31.8, 29.6, 29.6, 29.4, 29.3, 29.1, 28.7, 28.5, 27.3, 27.1, 25.7, 25.2, 22.6, 18.2, 14.5.

**HRMS** (ESI): calculated for  $\text{C}_{54}\text{H}_{86}\text{N}_9\text{O}_8\text{S}$   $[\text{M}+\text{NH}_4]^+$  1020.6315; found: 1020.6313.

**FT-IR** (neat): 3277, 2977, 1709, 1674, 1668, 1586, 1555, 1496, 1454, 1417, 1369, 1153, 1087, 1045, 699  $\text{cm}^{-1}$ .

### Methyl ((R)-2-((R)-2-((tert-butoxycarbonyl)amino)-3-phenylpropanamido)-4-phenylbutanethioyl)-L-phenylalanyl-L-alanyl-L-tyrosylvalinate (11e)

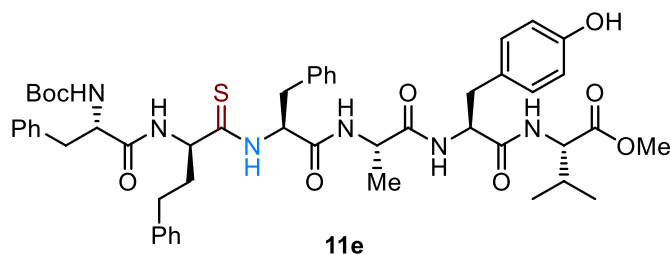

Following procedure B: **11e** was isolated as a yellow oil in 51% yield (47.7 mg; 0.051 mmol) which was purified by silica gel chromatography (DCM:MeOH = 50:1~10:1,  $R_f$  = 0.5 (DCM:MeOH = 10:1)).

$[\alpha]_{25}^D = 15.6$  ( $c = 1.40$ ,  $\text{CHCl}_3$ ).

## SUPPORTING INFORMATION

**<sup>1</sup>H NMR** (400 MHz, MeOD-*d*<sub>4</sub>) δ 7.34 – 7.04 (m, 15H), 7.01 (d, *J* = 8.1 Hz, 2H), 6.93 (d, *J* = 7.1 Hz, 2H), 6.67 (dd, *J* = 8.6, 4.9 Hz, 2H), 5.38 (dd, *J* = 10.9, 4.2 Hz, 1H), 4.65 – 4.48 (m, 1H), 4.47 – 4.08 (m, 4H), 3.71 – 3.57 (m, 3H), 3.39 (dd, *J* = 14.4, 4.1 Hz, 1H), 3.15 – 2.93 (m, 3H), 2.92 – 2.74 (m, 2H), 2.22 – 1.97 (m, 3H), 1.90 – 1.59 (m, 2H), 1.39 (d, *J* = 6.4 Hz, 2H), 1.36 (s, 9H), 1.31 – 1.19 (m, 1H), 0.92 (dt, *J* = 6.9, 5.4 Hz, 6H).

**<sup>13</sup>C NMR** (101 MHz, MeOD-*d*<sub>4</sub>) δ 206.0, 173.0, 172.5, 171.9, 171.7, 170.8, 155.9, 141.1, 137.3, 136.9, 130.1, 130.0, 129.0, 128.8, 128.2, 128.2, 128.1, 128.0, 127.3, 126.6, 126.4, 125.6, 114.9, 79.5, 60.0, 59.3, 57.9, 56.3, 54.9, 51.2, 49.5, 37.8, 36.7, 36.3, 31.1, 30.7, 27.4, 18.1, 17.4, 16.5.

**HRMS** (ESI): calculated for C<sub>51</sub>H<sub>65</sub>N<sub>6</sub>O<sub>9</sub>S [M+H]<sup>+</sup> 937.4528; found: 937.4526.

**FT-IR** (neat): 3281, 3064, 3028, 2969, 2931, 1728, 1633, 1516, 1496, 1451, 1436, 1367, 1168, 916, 699 cm<sup>-1</sup>.

### **Di-*tert*-butyl ((propane-1,3-diylbis(azanediyl))bis(3-thioxopropane-3,1-diyl)) dicarbamate (13)**

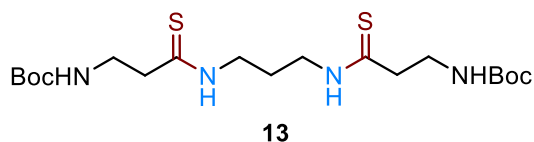

Following procedure A: the bis-thioamidated product **13** was isolated as a yellow solid in 94% yield (1.265 g; 2.82 mmol) which was purified by silica gel chromatography (DCM: MeOH = 100:1~20:1, *R*<sub>f</sub> = 0.5 (DCM: MeOH = 20:1)).

**<sup>1</sup>H NMR** (400 MHz, CDCl<sub>3</sub>) δ 9.02 (s, 1H), 5.36 (s, 1H), 3.75 (d, *J* = 5.7 Hz, 2H), 3.54 (q, *J* = 6.2 Hz, 2H), 2.87 (s, 2H), 1.98 (p, *J* = 6.1 Hz, 1H), 1.43 (s, 9H).

**<sup>13</sup>C NMR** (101 MHz, CDCl<sub>3</sub>) δ 202.6, 156.4, 79.8, 46.2, 42.6, 39.4, 28.5, 26.5.

**HRMS** (ESI): calculated for C<sub>19</sub>H<sub>37</sub>N<sub>4</sub>O<sub>4</sub>S<sub>2</sub> [M+H]<sup>+</sup> 449.2251; found: 449.2253.

**FT-IR** (neat): 3267, 2979, 1688, 1521, 1458, 1410, 1365, 1170, 1094, 1046, 859, 706 cm<sup>-1</sup>.

## SUPPORTING INFORMATION

### **Di-tert-butyl (3,7,13,17-tetrathioxo-4,8,12,16-tetraazanonadecane-1,19-diyl)dicarbamate (14)**

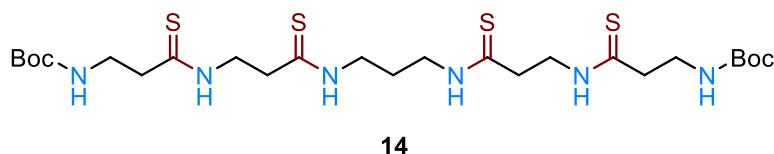

Following procedure A after *bis-N*-boc deprotection of **13** with 4M HCl in 1,4-dioxane solution: the tetrakis-thioamide **14** was isolated as a yellow solid in 91% yield (113.2 mg; 0.182 mmol) which was purified by silica gel chromatography (DCM: MeOH= 100:1~20:1,  $R_f$ = 0.45 (DCM: MeOH = 20:1)).

**$^1\text{H}$  NMR** (400 MHz,  $\text{CDCl}_3$ )  $\delta$  9.24 (s, 1H), 9.00 (s, 1H), 5.39 (t,  $J$  = 6.0 Hz, 1H), 4.16 – 4.02 (m, 2H), 3.75 (s, 2H), 3.51 (s, 2H), 3.02 (s, 2H), 2.85 (s, 2H), 2.03 (s, 1H), 1.43 (s, 9H).

**$^{13}\text{C}$  NMR** (101 MHz,  $\text{CDCl}_3$ )  $\delta$  202.3, 156.5, 79.9, 46.5, 44.7, 43.5, 42.9, 39.8, 28.5, 26.3.

**HRMS** (ESI): calculated for  $\text{C}_{25}\text{H}_{46}\text{N}_6\text{O}_4\text{S}_4\text{Na}$   $[\text{M}+\text{Na}]^+$  645.2356; found: 645.2355.

**FT-IR** (neat): 3265, 2977, 1685, 1520, 1506, 1457, 1364, 1165, 1087, 1043, 867  $\text{cm}^{-1}$ .

### ***N,N'*-(3,7,13,17-tetrathioxo-4,8,12,16-tetraazanonadecane-1,19-diyl)bis(4-methoxybenzothioamide) (16)**

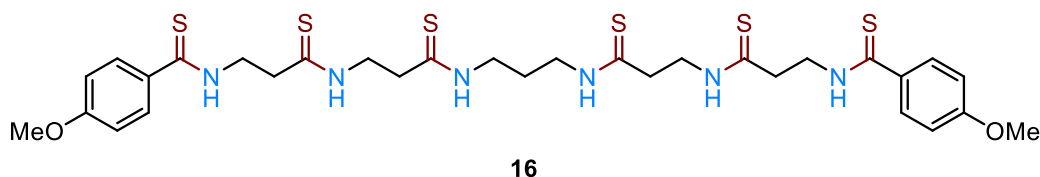

Following **procedure A** after *bis-N*-Boc deprotection of **14** with 4M HCl in 1,4-dioxane solution: the hexakis-thioamide **16** was isolated as a yellow oil in 55% yield (79.4 mg; 0.11 mmol) which was purified by silica gel chromatography (DCM: MeOH= 100:1~20:1,  $R_f$  = 0.5(DCM: MeOH = 20:1)).

**$^1\text{H}$  NMR** (400 MHz,  $\text{CDCl}_3$ )  $\delta$  9.02 (s, 1H), 8.74 (s, 1H), 8.43 (s, 1H), 7.84 (d,  $J$  = 8.8 Hz, 2H), 6.89 (d,  $J$  = 8.8 Hz, 2H), 4.16 – 4.09 (m, 2H), 4.07 – 3.99 (m, 2H), 3.84 (s,

## SUPPORTING INFORMATION

3H), 3.57 (d,  $J = 5.4$  Hz, 2H), 3.14 – 3.03 (m, 2H), 2.99 – 2.89 (m, 2H), 1.81 (dd,  $J = 16.1, 9.9$  Hz, 2H).

**$^{13}\text{C}$  NMR** (101 MHz,  $\text{CDCl}_3$ )  $\delta$  202.1, 202.0, 196.8, 162.6, 133.2, 129.0, 113.9, 55.7, 45.1, 44.4, 43.3, 42.7, 26.5.

**HRMS** (ESI): calculated for  $\text{C}_{31}\text{H}_{43}\text{N}_6\text{O}_2\text{S}_6$   $[\text{M}+\text{H}]^+$  723.1766; found: 723.1768.

**FT-IR** (neat): 3205, 2935, 1604, 1527, 1502, 1439, 1403, 1326, 1169, 1087, 917, 713  $\text{cm}^{-1}$ .

### ***N,N'*-(3,7,13,17-tetrathio-4,8,12,16-tetraazanonadecane-1,19-diyl)bis(4-hydroxybenzothioamide)** (**Closthioamide**)

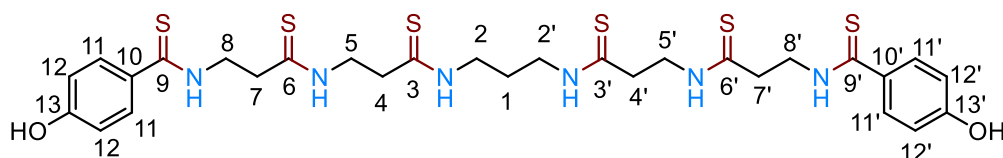

**Closthioamide**

Following reported  $\text{BBr}_3$  demethylation of **16** with in DCM at  $-78$   $^{\circ}\text{C}$  to  $0$   $^{\circ}\text{C}$ ,<sup>[20]</sup> **Closthioamide** was isolated as a yellow oil in 62% yield (21.7 mg; 0.031 mmol) which was purified by silica gel chromatography (DCM: MeOH = 100:1~20:1,  $R_f = 0.5$  (DCM: MeOH = 20:1)).

**$^1\text{H}$  NMR** (400 MHz,  $\text{CD}_3\text{OD}$ )  $\delta$  9.73 (d,  $J = 30.2$  Hz, 1H), 7.72 (d,  $J = 8.7$  Hz, 2H), 6.76 (d,  $J = 8.7$  Hz, 2H), 4.11 (t,  $J = 6.8$  Hz, 2H), 4.01 (t,  $J = 6.7$  Hz, 2H), 3.62 (t,  $J = 6.9$  Hz, 2H), 3.03 (t,  $J = 6.8$  Hz, 2H), 2.93 (t,  $J = 6.7$  Hz, 2H), 1.95 (p,  $J = 6.9$  Hz, 1H).

**$^{13}\text{C}$  NMR** (101 MHz,  $\text{CD}_3\text{OD}$ )  $\delta$  203.3, 202.9, 199.1, 161.8, 134.0, 130.3, 115.7, 46.5, 45.8, 44.1, 44.1, 43.8, 27.1.

**HRMS** (ESI): calculated for  $\text{C}_{29}\text{H}_{39}\text{N}_6\text{O}_2\text{S}_6$   $[\text{M}+\text{H}]^+$  695.1453; found: 695.1448.

**FT-IR** (neat): 3208, 2936, 1527, 1502, 1438, 1402, 1325, 1169, 1086, 916, 714  $\text{cm}^{-1}$ .

|          | <b>Isolated Closthioamide</b> <sup>[21]</sup> |                     | <b>Synthesized Closthioamide</b>   |                     |
|----------|-----------------------------------------------|---------------------|------------------------------------|---------------------|
| Position | $\delta_{\text{H}}$ ( $J$ [Hz], m)            | $\delta_{\text{C}}$ | $\delta_{\text{H}}$ ( $J$ [Hz], m) | $\delta_{\text{C}}$ |

## SUPPORTING INFORMATION

|               |               |       |               |       |
|---------------|---------------|-------|---------------|-------|
| <b>1</b>      | 1.94 (6.9, p) | 27.1  | 1.95 (6.9, p) | 27.1  |
| <b>2,2'</b>   | 3.62 (6.9, t) | 44.1  | 3.62 (6.9, t) | 44.1  |
| <b>3,3'</b>   | -             | 202.9 | -             | 202.9 |
| <b>4,4'</b>   | 2.93 (6.8, t) | 43.8  | 2.93 (6.7, t) | 43.8  |
| <b>5,5'</b>   | 4.01 (6.8, t) | 45.8  | 4.01 (6.7, t) | 45.8  |
| <b>6,6'</b>   | -             | 203.3 | -             | 203.3 |
| <b>7,7'</b>   | 3.02 (6.8, t) | 44.1  | 3.03 (6.8, t) | 44.1  |
| <b>8,8'</b>   | 4.11 (6.8, t) | 46.5  | 4.11 (6.8, t) | 46.5  |
| <b>9,9'</b>   | -             | 199.1 | -             | 199.1 |
| <b>10,10'</b> | -             | 133.9 | -             | 134.0 |
| <b>11,11'</b> | 7.71 (8.9, d) | 130.3 | 7.72 (8.7, d) | 130.3 |
| <b>12,12'</b> | 6.75 (8.9, d) | 115.7 | 6.76 (8.7, d) | 115.7 |
| <b>13,13'</b> | -             | 161.8 | -             | 161.8 |

## 4. Mechanistic experiments

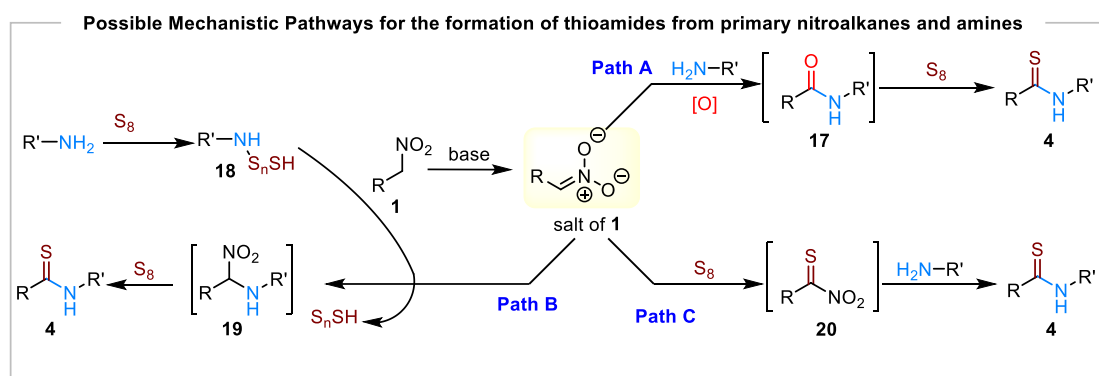

Figure S2 Three possible mechanistic pathways

## 4.1 Control reactions to interrogate path A.

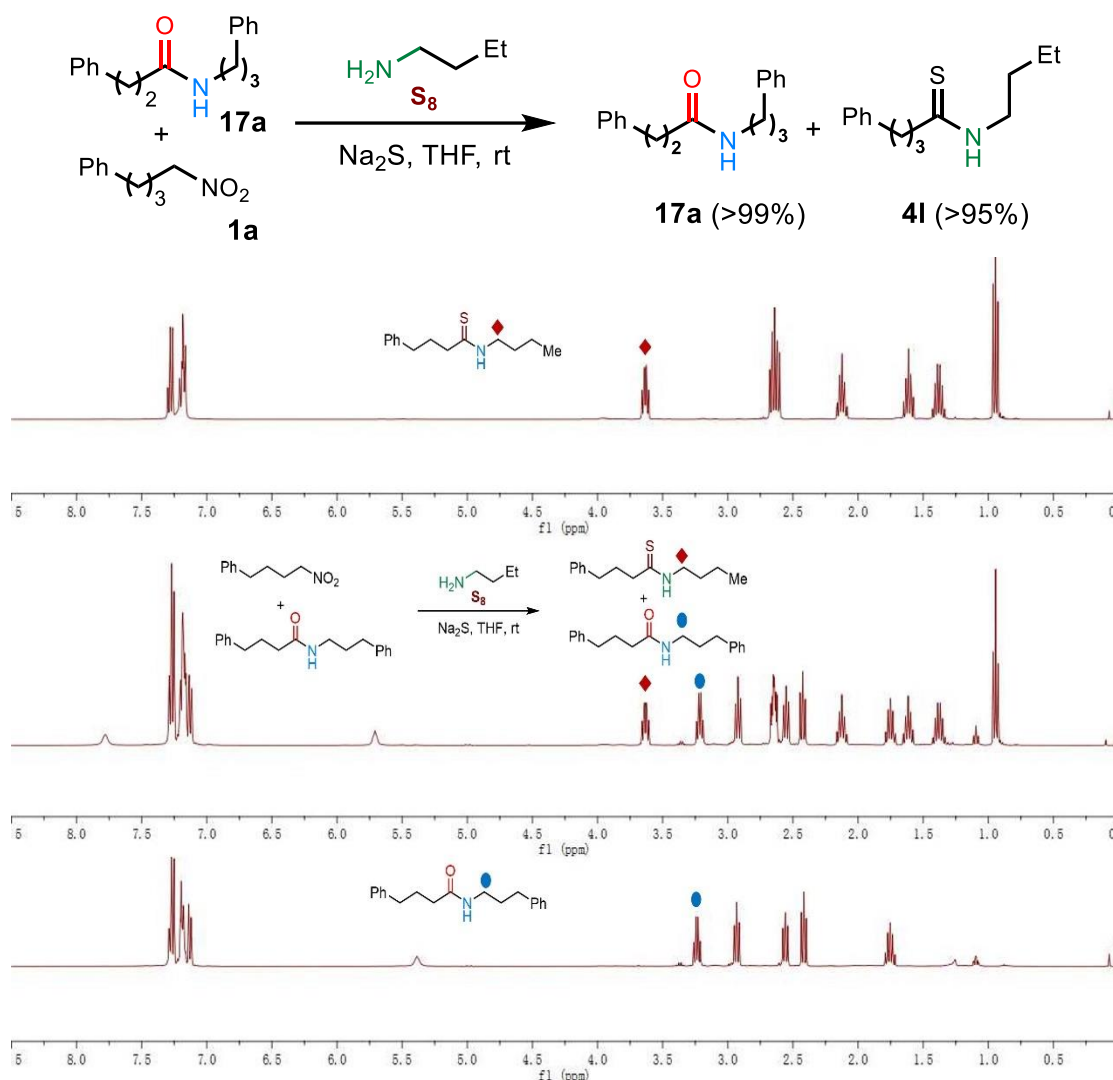

Figure S3 Comparison of the possibility of oxamide to thioamide.

## SUPPORTING INFORMATION

We synthesize oxamide **17a** via reported procedure<sup>[22]</sup>, then treated with our standard condition, however, all the oxamide was completely recovered and no thioamide was observed at all (Eq. 1 in main).

### **N-butyl-4-phenylbutanethioamide (4l)**

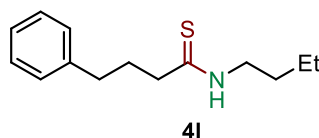

Following procedure A: **4l** was isolated as a yellow oil in 98% yield (46.1 mg; 0.196 mmol) which was purified by silica gel chromatography (PE:EA = 20:1~5:1,  $R_f$  = 0.5 (PE:EA = 5:1)).

**<sup>1</sup>H NMR** (400 MHz, CDCl<sub>3</sub>)  $\delta$  7.29 (d,  $J$  = 6.9 Hz, 2H), 7.22 – 7.15 (m, 3H), 3.71 – 3.57 (m, 2H), 2.64 (dt,  $J$  = 15.1, 7.7 Hz, 4H), 2.19 – 2.05 (m, 2H), 1.68 – 1.56 (m, 2H), 1.38 (h,  $J$  = 7.3 Hz, 2H), 0.95 (t,  $J$  = 7.4 Hz, 3H).

**<sup>13</sup>C NMR** (101 MHz, CDCl<sub>3</sub>)  $\delta$  205.0, 141.4, 128.6, 128.5, 126.1, 46.4, 46.0, 34.9, 30.8, 30.2, 20.3, 13.9.

**HRMS** (ESI): calculated for C<sub>14</sub>H<sub>22</sub>NS [M+H]<sup>+</sup> 236.1473; found: 236.1476.

**FT-IR** (neat): 3353, 2931, 2856, 1530, 1495, 1453, 1406, 1340, 1123, 1085, 1030, 909, 699 cm<sup>-1</sup>.

**Conclusion:** Based on all control reaction in **Section 4.1**, thioamide formation via oxamide in *Figure S2 (Path A)* was ruled out.

## 4.2 Control reactions to interrogate path B.

### 4.2.1 Synthesis 1-(phenylthio)piperidine (**18a**)

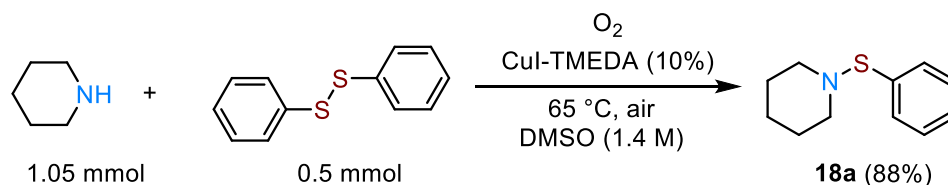

Sulfenamide **18a** was synthesized via reported procedure.<sup>[23]</sup>



## SUPPORTING INFORMATION

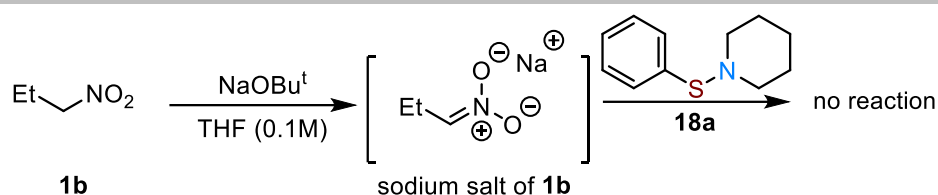

### 4.2.2 Synthesis of Diethyl 1-(nitro(phenyl)methyl)hydrazine-1,2-dicarboxylate (**19a**)

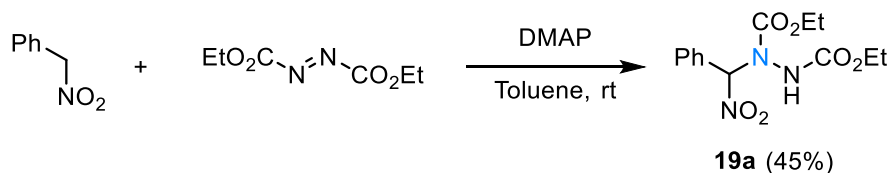

**19a** was prepared from (nitromethyl)benzene in one step according to a reported procedure,<sup>[24]</sup> which was isolated as a colorless oil in 45% yield (140.0 mg; 0.45 mmol) after purification by silica gel chromatography (PE:EA = 20:1~5:1,  $R_f$  = 0.4 (PE:EA = 10:1)).

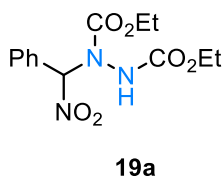

**$^1\text{H}$  NMR** (400 MHz,  $\text{CDCl}_3$ )  $\delta$  7.90 (s, 1H), 7.70 (s, 1H), 7.57 – 7.42 (m, 4H), 4.24 (q,  $J$  = 7.1 Hz, 4H), 4.01 (d,  $J$  = 7.1 Hz, 1H), 1.34 – 1.25 (m, 6H).

**$^{13}\text{C}$  NMR** (101 MHz,  $\text{CDCl}_3$ )  $\delta$  155.9, 153.9, 130.7, 129.5, 128.3(2C), 63.2, 62.5, 14.6, 14.5, 13.9.

**HRMS** (ESI): calculated for  $\text{C}_{13}\text{H}_{21}\text{N}_4\text{O}_6$   $[\text{M}+\text{NH}_4]^+$  318.1272; found: 318.1273.

**FT-IR** (neat): 3371, 2986, 1732, 1503, 1375, 1323, 1218, 1096, 1056, 1031, 702  $\text{cm}^{-1}$ .

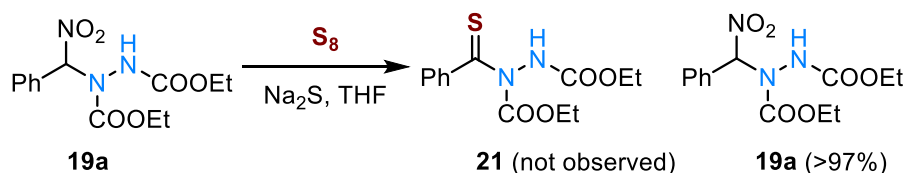

**19a** was treated with  $\text{S}_8$  in our standard condition, we try to see it is any possible to generate thioamide, but only starting materials was generated.

## SUPPORTING INFORMATION

**Conclusion:** Based on all control reaction in **Section 4.2**, thioamide formation via  $\alpha$ -amino nitroalkane in *Figure S2 (Path b)* was ruled out.

### 4.3 Control reactions to trap proposed thioacyl intermediate **20** (Pathc).

**4.3.1** NMR and HRMS studies of **nitroalkane 22** was mixed with  $\text{Na}_2\text{S}$  and  $\text{S}_8$  in  $\text{d}^6$ -DMSO

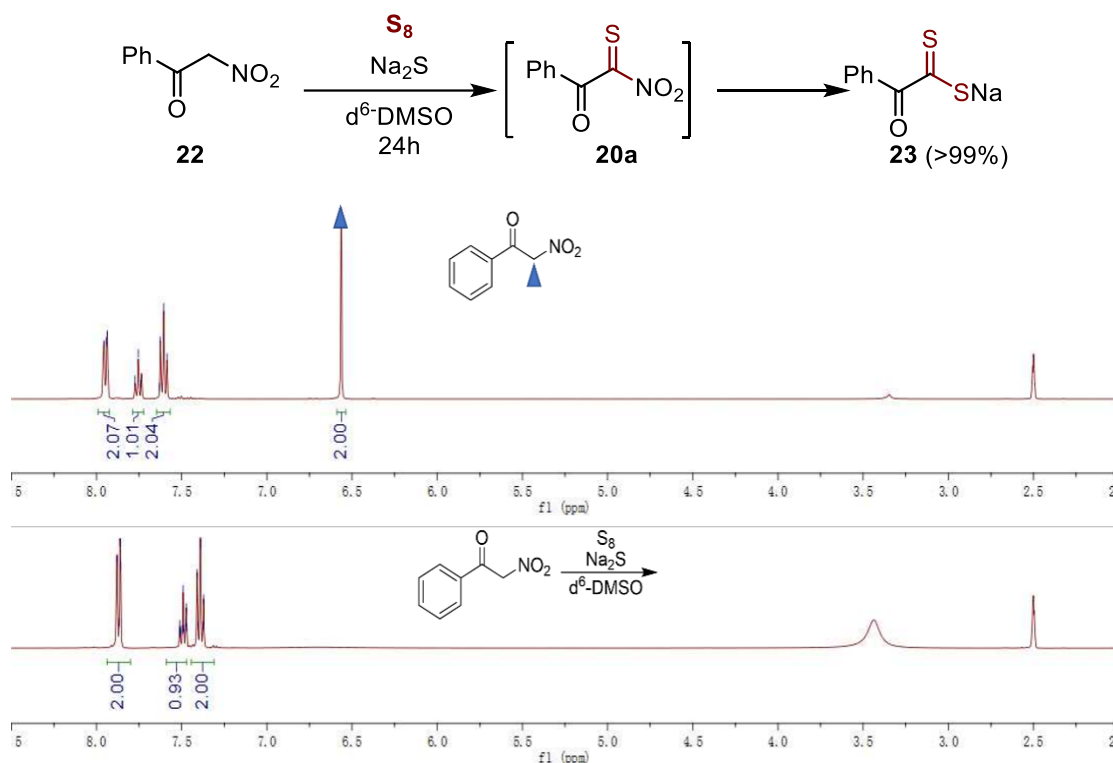

**Figure. S4** In situ NMR studies of nitroalkane reacts with  $\text{S}_8$  and  $\text{Na}_2\text{S}$

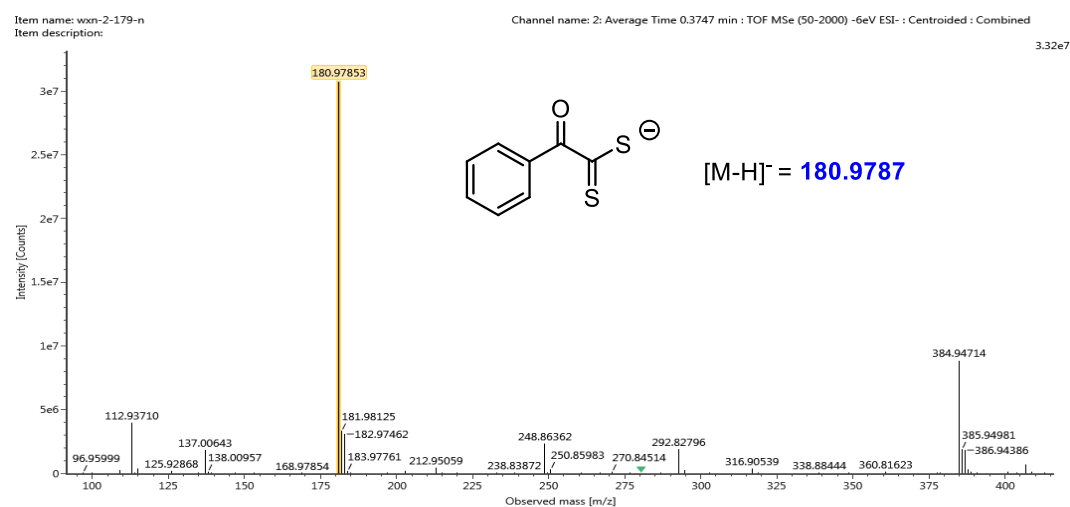

**Figure S4** In-situ HRMS study by negative ion mode

Character of **Sodium 2-oxo-2-phenylethanedithioate (23)**

## SUPPORTING INFORMATION

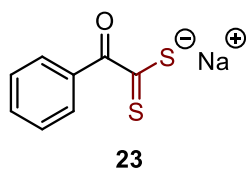

The yield determined by  $^1\text{H}$  NMR, >99%.

$^1\text{H}$  NMR (400 MHz, DMSO- $d_6$ )  $\delta$  7.94 – 7.80 (m, 2H), 7.59 – 7.47 (m, 1H), 7.44 – 7.31 (m, 2H).

$^{13}\text{C}$  NMR (101 MHz, DMSO- $d_6$ )  $\delta$  254.6, 191.5, 134.8, 132.5, 130.2, 128.5.

HRMS (ESI): calculated for  $\text{C}_8\text{H}_4\text{OS}_2\text{Na}$   $[\text{M}-\text{H}]^-$  180.9785; found: 180.9787.

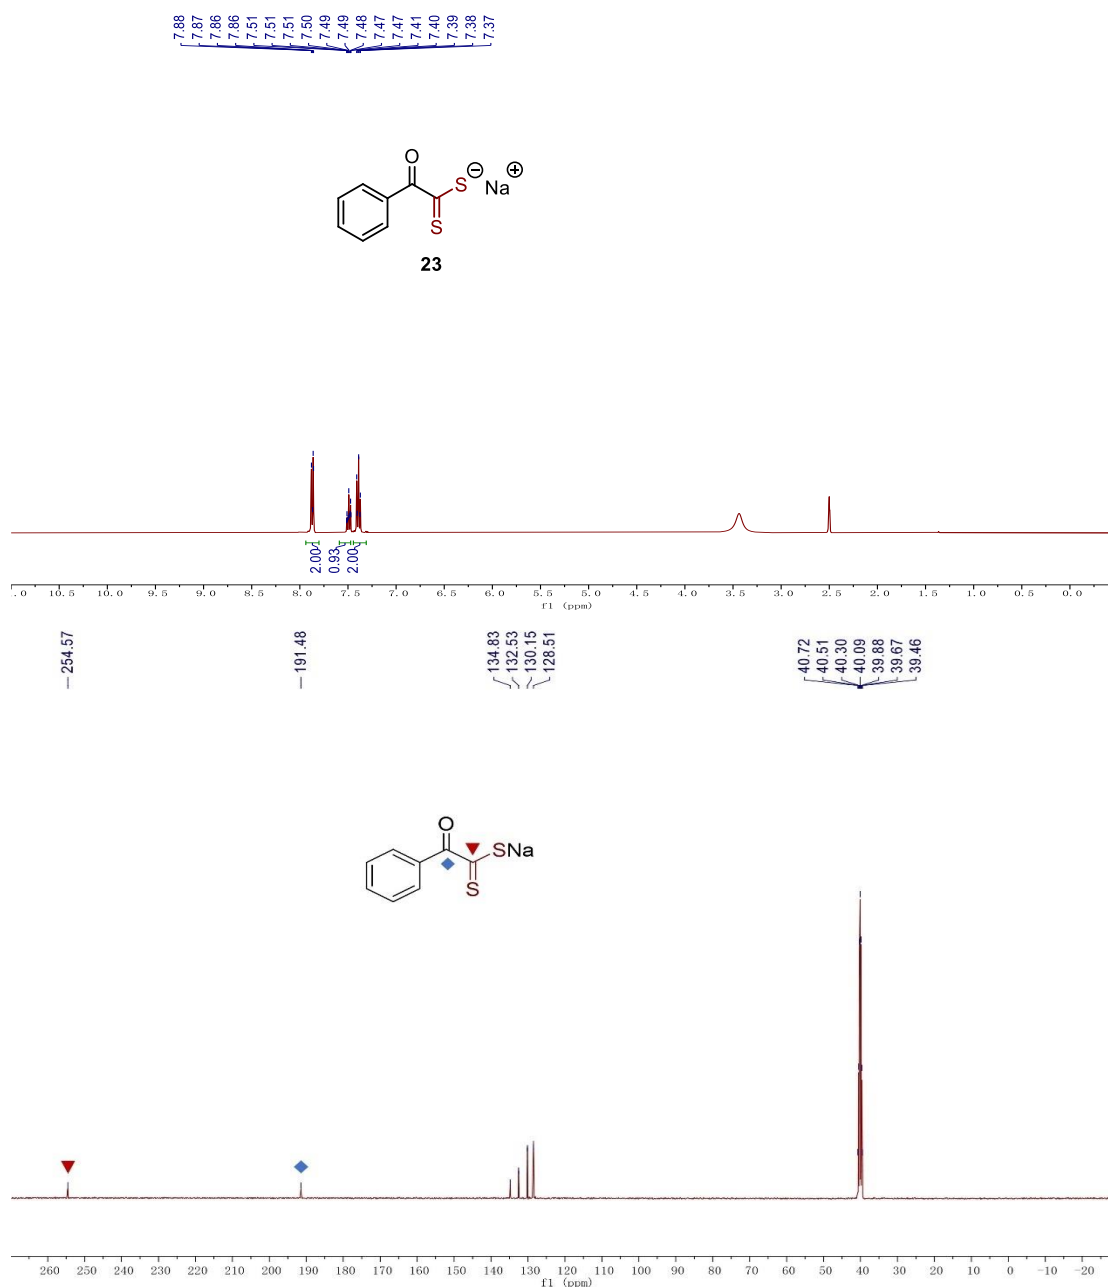

## SUPPORTING INFORMATION

### 4.3.2 Intramolecular trapping thioacyl nitrate with alcohol nucleophiles

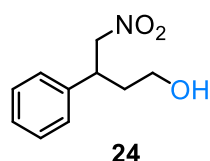

The **4-Nitro-3-phenylbutan-1-ol (24)** was prepared in 83% yield (5 mmol) from 3-Phenylpropanal in two steps according to a reported procedure.<sup>[25]</sup>

#### a. Intramolecular experiment to trap acyl nitrate with alcohol:

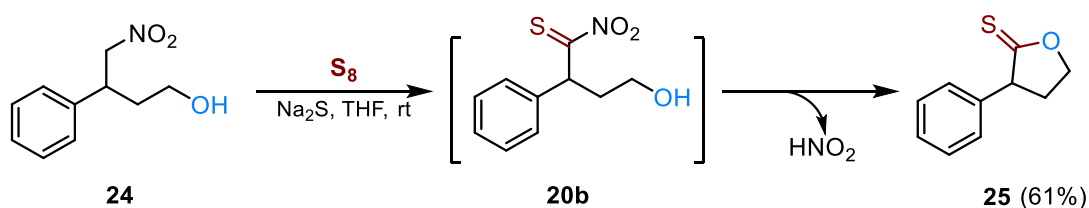

#### b. Intermolecular and intramolecular competing experiment to trap acyl nitrate with alcohol:

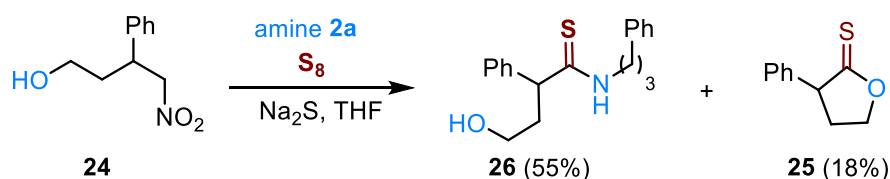

*Figure. S5 Control reaction*

### 3-Phenyldihydrofuran-2(3H)-thione (25)

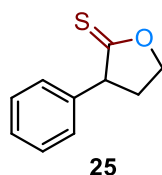

Following procedure A: **25** was isolated as a yellow oil in 61% yield (21.7 mg; 0.122 mmol) which was purified by silica gel chromatography (PE:EA = 20:1~5:1,  $R_f$  = 0.5 (PE:EA = 7:1)).

**<sup>1</sup>H NMR** (400 MHz, CDCl<sub>3</sub>)  $\delta$  7.42 – 7.26 (m, 5H), 4.82 (ddd,  $J$  = 9.2, 8.2, 4.1 Hz, 1H), 4.68 (td,  $J$  = 9.1, 6.9 Hz, 1H), 4.14 (t,  $J$  = 9.0 Hz, 1H), 2.78 (dddd,  $J$  = 12.7, 8.5, 6.8, 4.0 Hz, 1H), 2.45 (dq,  $J$  = 12.8, 8.8 Hz, 1H).

**<sup>13</sup>C NMR** (101 MHz, CDCl<sub>3</sub>)  $\delta$  223.8, 139.3, 129.0, 128.4, 127.8, 75.0, 60.2, 33.5.

**HRMS** (ESI): calculated for C<sub>10</sub>H<sub>10</sub>OSNa [M+Na]<sup>+</sup> 201.0345; found: 201.0341.

## SUPPORTING INFORMATION

**FT-IR** (neat): 2963, 1494, 1473, 1454, 1370, 1149, 699  $\text{cm}^{-1}$ .

### **4-Hydroxy-2-phenyl-N-(3-phenylpropyl)butanethioamide (26)**

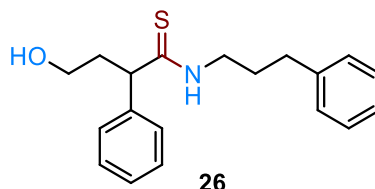

Following procedure A: **26** was isolated as a yellow oil in 55% yield (17.2 mg; 0.055 mmol) which was purified by silica gel chromatography (PE:EA = 20:1~2:1,  $R_f$  = 0.5 (PE:EA = 1:1)).

**$^1\text{H}$  NMR** (400 MHz,  $\text{CDCl}_3$ )  $\delta$  7.38 – 7.27 (m, 6H), 7.25 – 7.16 (m, 3H), 7.07 (d,  $J$  = 7.1 Hz, 2H), 4.07 (t,  $J$  = 7.6 Hz, 1H), 3.70 (ddd,  $J$  = 12.1, 7.1, 5.2 Hz, 1H), 3.66 – 3.57 (m, 3H), 2.58 – 2.51 (m, 3H), 2.15 (dtd,  $J$  = 14.0, 7.0, 5.1 Hz, 1H), 1.99 – 1.84 (m, 3H).

**$^{13}\text{C}$  NMR** (101 MHz,  $\text{CDCl}_3$ )  $\delta$  206.0, 141.0, 139.8, 129.2, 128.7, 128.4, 128.1, 127.9, 126.3, 60.5, 57.0, 45.7, 37.8, 33.3, 29.4.

**HRMS** (ESI): calculated for  $\text{C}_{19}\text{H}_{24}\text{NOS}$   $[\text{M}+\text{H}]^+$  314.1573; found: 314.1573.

**FT-IR** (neat): 3343, 3240, 2930, 2880, 1550, 1533, 1495, 1453, 1378, 1132, 1051, 1029, 913, 699  $\text{cm}^{-1}$ .

### **c. Ion chromatography experiment to detect the formation of $\text{NO}_2^-$**

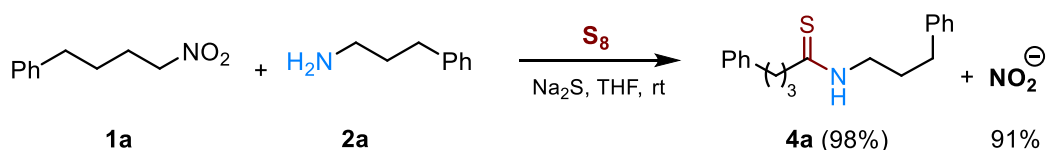

The nitro compound **1a** (0.2 mmol) and  $\text{Na}_2\text{S}$  (2 equiv.) were added to a 10 mL reaction tube, followed by THF (2 mL). After stirring for 10 minutes,  $\text{S}_8$  (2.0 equiv.) was added. Next, the reaction was stirred at rt for another 10 minutes and the amine **2a** (2.0 equiv.) was added. The reaction was monitored by TLC until the nitroalkane was consumed. The mixture was then concentrated under reduced pressure and distilled water (5 mL) was added to the crude residue. Ultrasonication at 45  $^\circ\text{C}$  for one hour and centrifugation for 10 minutes then gave a clear liquid. This set of operations was repeated four times

## SUPPORTING INFORMATION

to give four water samples, which were combined, filtered and analyzed by ion chromatography in triplicate. In this way, the amount of  $\text{NO}_2^-$  via ion chromatographic analysis was performed 3 times to give an average concentration.

### Theoretical concentration:

$$\text{NO}_2^- = 0.0133 \text{ mmol/mL} = 13.3 \text{ mmol/L}$$

### Analysis results:

$$\text{NO}_2^- = (9.473 \times 20 \times 2.94 \div 46) \text{ mmol/L} = 12.1 \text{ mmol/L}$$

|               |          |
|---------------|----------|
| Average value | 9.473    |
| SD            | 0.216ppm |
| RSD           | 2.277%   |

### Test conditions:

|                   |                                                                     |
|-------------------|---------------------------------------------------------------------|
| Test column       | MetrosepA Supp 5 (250 mmH×4.0 mm IC)                                |
| Guard column type | Metrosep A Supp 5 Guard/ 4.0                                        |
| Sample volume     | 200ul                                                               |
| Eluent            | 3.2 mmol/L $\text{Na}_2\text{CO}_3$ - 1.0 mmol/L $\text{NaHCO}_3$   |
| Temperature       | 40 °C                                                               |
| Flow              | 0.700 mL/min                                                        |
| Suppressor        | MSM-HC (Metrohm, regeneration fluid: 0.5% $\text{H}_2\text{SO}_4$ ) |
| Suppressor        | MCS (Metrohm)                                                       |
| Detector          | Conductivity detector (Metrohm)                                     |
| Software          | MagIC Net™                                                          |

## SUPPORTING INFORMATION

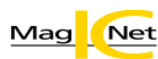

2022-06-02 18:08:33

### Sample data

Ident ..... -1-3 20  
 Sample type .....  
 Determination start ..... 2022-05-02 20:17:51 UTC+8  
 Method ..... 20min  
 Operator ..... HPIC

### Anions

..... 1 (940 Professional IC Vario 1)  
 ..... 16.9 min  
 ..... Metrosep A Supp 5 - 250/4.0  
 ..... 0.700 mL/min  
 ..... 12.09 MPa  
 ..... 40.0 °C

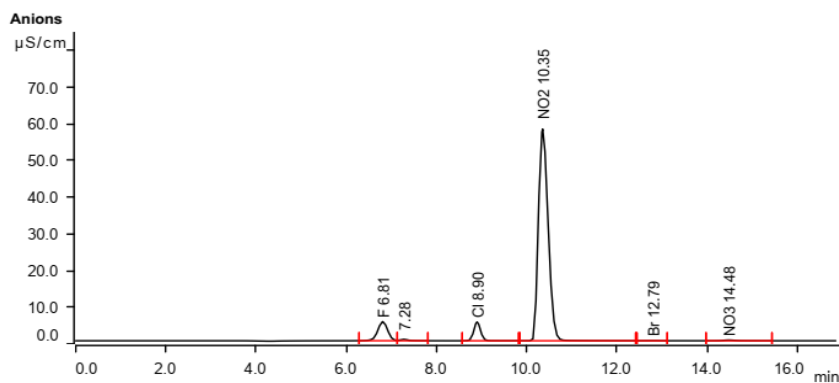

| 峰序列号 | 保留时间<br>min | 面积<br>(μS/cm)× min | 高度<br>μS/cm | 浓度<br>ppm | 组分名称 | RSD Y   |
|------|-------------|--------------------|-------------|-----------|------|---------|
| 1    | 6.805       | 1.3234             | 5.214       | -0.431    | F    | 81.154  |
| 3    | 8.897       | 0.8909             | 5.142       | 0.893     | Cl   | 87.975  |
| 4    | 10.350      | 14.3636            | 57.740      | 9.099     | NO2  | 122.703 |
| 5    | 12.792      | 0.0072             | 0.028       | 0.158     | Br   | 3.036   |
| 6    | 14.475      | 0.0556             | 0.192       | 0.648     | NO3  | 80.932  |

**Figure S6 Ion chromatographic analysis**

**Conclusion:** Based on all control reaction in [Section 4.3](#), thioamide formation via thioacyl nitrate as a key intermediate in [Figure S2 \(Path B\)](#).

## SUPPORTING INFORMATION

### 4.4 Control reaction to determine how thioacyl nitrate can form.

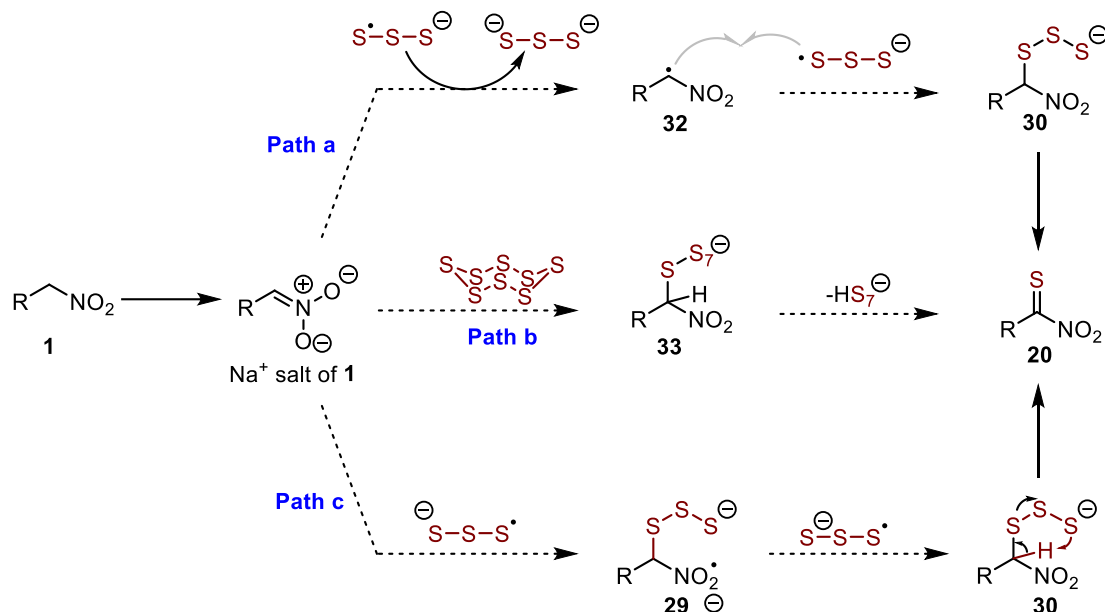

**Figure S7** Three possible mechanistic pathways to thioamide bond formation

Based on relevant literature and results herein, there are three possible mechanistic pathways to form thioamides from nitroalkanes. These are proposed in **Figure S7**. Below, we present evidence to distinguish the reasonable mechanistic pathway.

#### 4.4.1 Control reactions to rule out Path a and Path b

We designed a nitroalkanes bearing a *cis*-cyclopropane; if a radical intermediate like **32** is formed, we would observe the *trans*-thioamide **trans-28** via radical ring opening and closing. Indeed, we only observed and isolated thioamide **cis-28**.

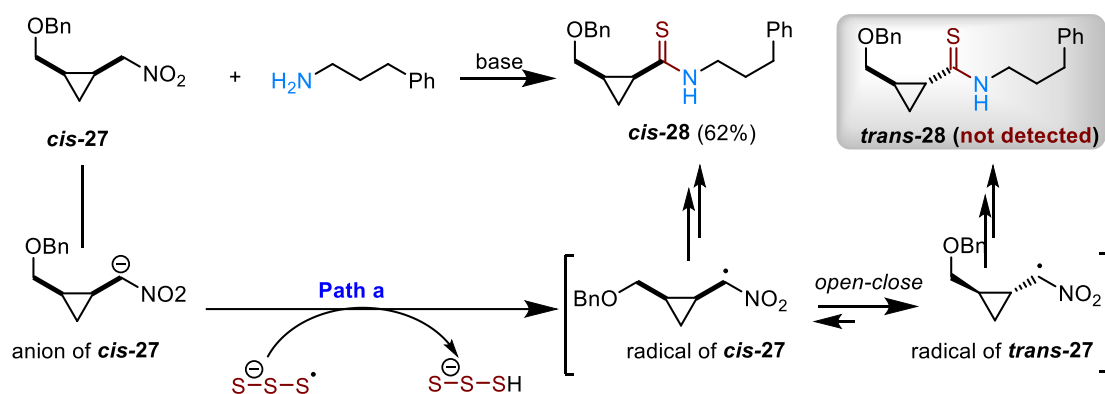

**Figure S8** Radical clock reaction

**Conclusion:** Based on this reaction, **Path a** in Figure. 27 was ruled out.



## SUPPORTING INFORMATION

### 4.4.2 Control reaction to distinguish Path b and Path c

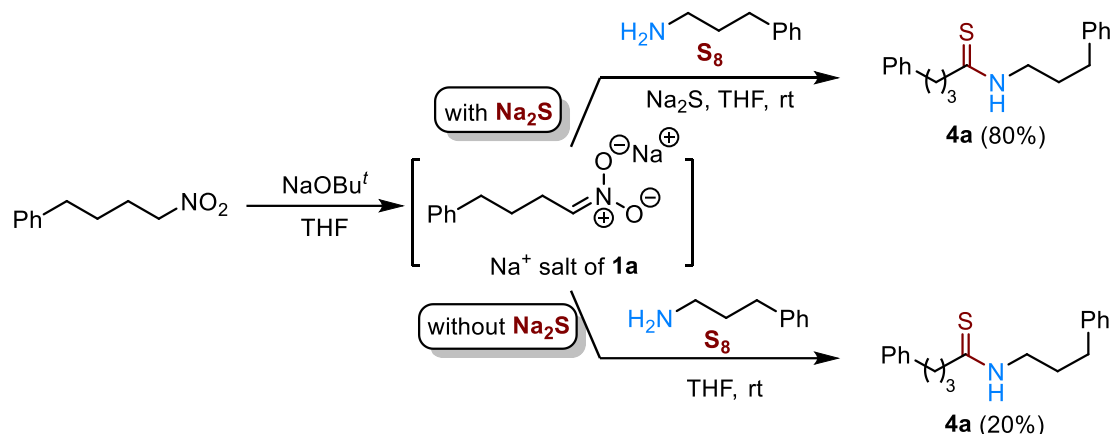

Figure S9 Na<sup>+</sup> salt of **1a** reacts with S<sub>8</sub> and S<sub>3</sub> radical anion

**Conclusion:** Based on above reaction and ref. 36, 37 of paper, **Path b** was ruled out.

### (((1*R*,2*S*)-2-(Nitromethyl)cyclopropyl)methoxy)methyl)benzene (*cis*-27)

The nitro compound was prepared in 43% yield (2 mmol) through two steps according to a reported procedure.<sup>[26]</sup>

**<sup>1</sup>H NMR** (101 MHz, CDCl<sub>3</sub>) δ 7.38 – 7.26 (m, 5H), 4.57 – 4.41 (m, 3H), 4.26 (dd, *J* = 13.8, 8.2 Hz, 1H), 3.74 (dd, *J* = 10.5, 5.4 Hz, 1H), 3.29 (dd, *J* = 10.5, 8.3 Hz, 1H), 1.62 (pd, *J* = 8.3, 5.6 Hz, 1H), 1.46 (qt, *J* = 8.5, 5.7 Hz, 1H), 0.99 (td, *J* = 8.4, 5.4 Hz, 1H), 0.50 (q, *J* = 5.6 Hz, 1H).

**<sup>13</sup>C NMR** (101 MHz, CDCl<sub>3</sub>) δ 138.0, 128.6(2C), 127.9, 76.1, 73.1, 69.2, 16.2, 13.3, 8.9.

### (1*S*,2*R*)-2-((Benzyloxy)methyl)-*N*-(3-phenylpropyl)cyclopropane-1-carbothioamide (28)

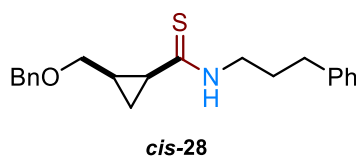

Following procedure B: In crude <sup>1</sup>H NMR, we only observed one isomer, which was isolated as a yellow oil in 62% yield (42.1 mg; 0.124 mmol) by silica gel

## SUPPORTING INFORMATION

chromatography (PE:EA = 20:1~5:1,  $R_f$  = 0.5 (PE:EA = 7:1)), and further conformed by 2D NMR as *cis*-isomer **28**.

**$^1\text{H}$  NMR** (400 MHz,  $\text{CDCl}_3$ )  $\delta$  7.86 (s, 1H), 7.37 – 7.26 (m, 7H), 7.24 – 7.17 (m, 1H), 7.16 – 7.11 (m, 2H), 4.49 – 4.40 (m, 2H), 3.84 (dd,  $J$  = 10.3, 5.0 Hz, 1H), 3.74 – 3.56 (m, 2H), 3.54 – 3.47 (m, 1H), 2.64 (t,  $J$  = 7.6 Hz, 2H), 2.09 (td,  $J$  = 8.5, 6.0 Hz, 1H), 1.90 (tt,  $J$  = 14.7, 7.1 Hz, 2H), 1.55 (qdd,  $J$  = 8.8, 6.6, 5.0 Hz, 1H), 1.23 (dd,  $J$  = 11.8, 5.9 Hz, 2H), 1.15 (td,  $J$  = 8.5, 5.2 Hz, 1H).

**$^{13}\text{C}$  NMR** (101 MHz,  $\text{CDCl}_3$ )  $\delta$  201.2, 141.2, 138.0, 128.6, 128.6, 128.4, 127.9, 126.2, 73.2, 69.2, 46.0, 33.4, 30.0, 29.5, 21.1, 12.1.

**HRMS** (ESI): calculated for  $\text{C}_{21}\text{H}_{26}\text{NOS}$   $[\text{M}+\text{H}]^+$  340.1730; found: 340.1731.

**FT-IR** (neat): 3265, 2928, 2855, 1602, 1541, 1496, 1452, 1404, 1329, 1163, 1108, 1071, 912, 699  $\text{cm}^{-1}$ .

2D NMR spectra was used to confirm the structure of **28** was *cis* isomer.

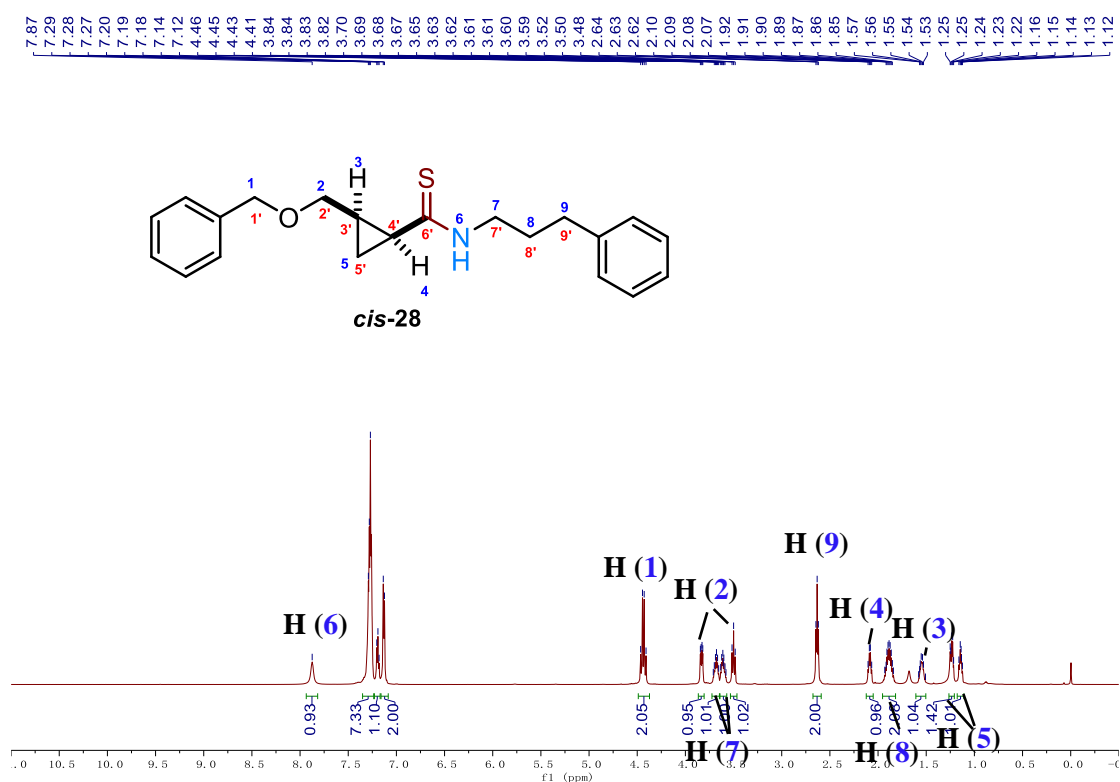

**$^1\text{H}$  NMR** (400 MHz, Chloroform-*d*) (**28**):

# SUPPORTING INFORMATION

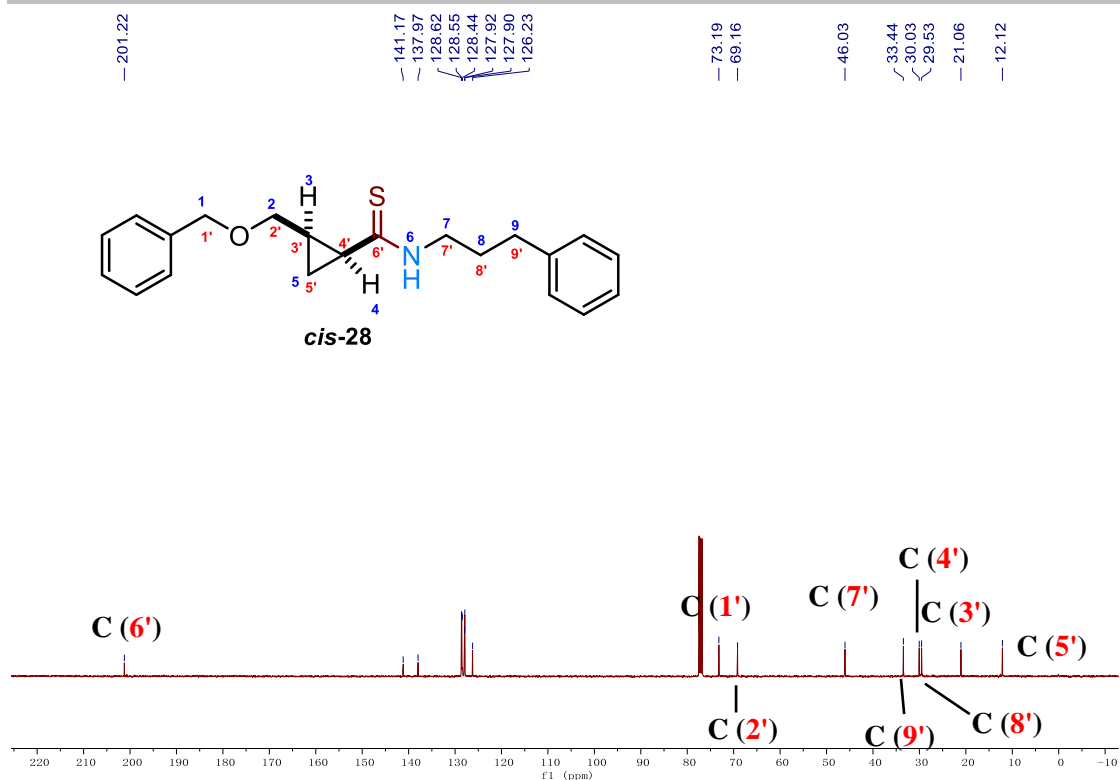

<sup>13</sup>C NMR (101 MHz, Chloroform-*d*) (28):

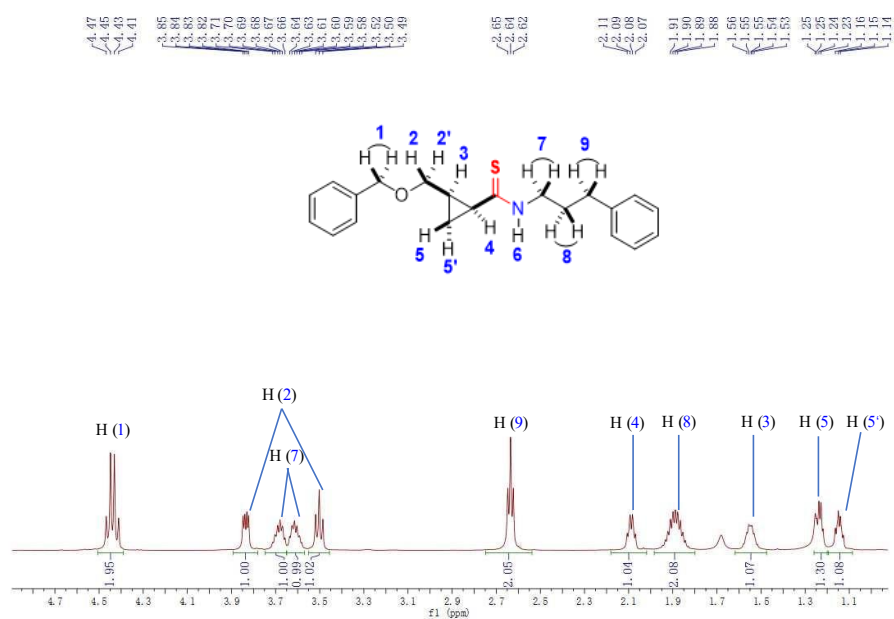

## SUPPORTING INFORMATION

### 2D Noesy spectrum of **28**:

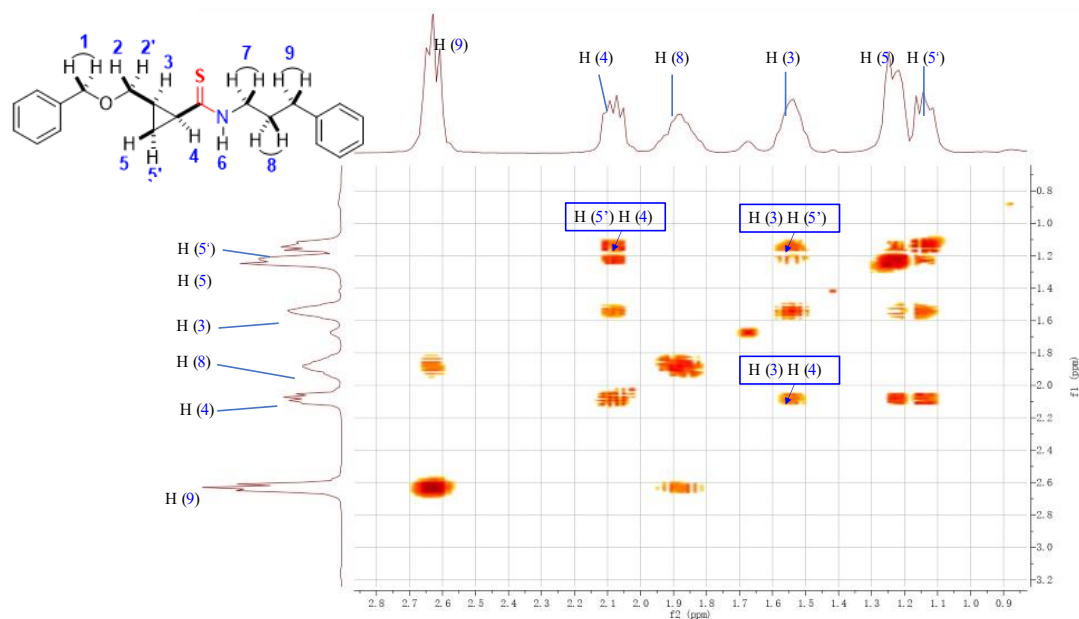

### 2D COSY spectrum of **28**:

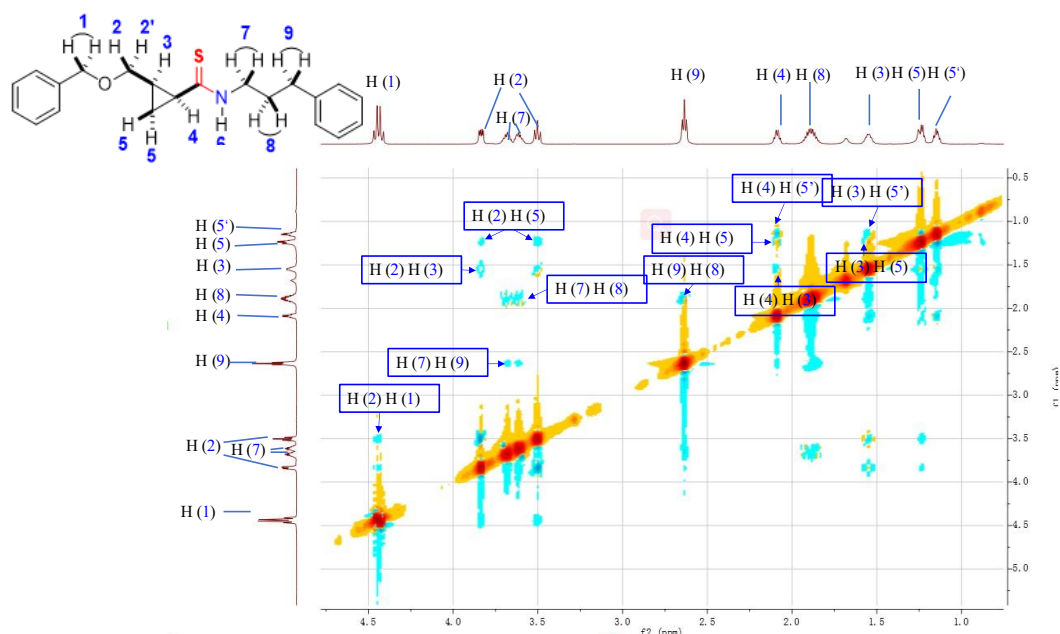

## SUPPORTING INFORMATION

2D HSQC spectrum of **28**:

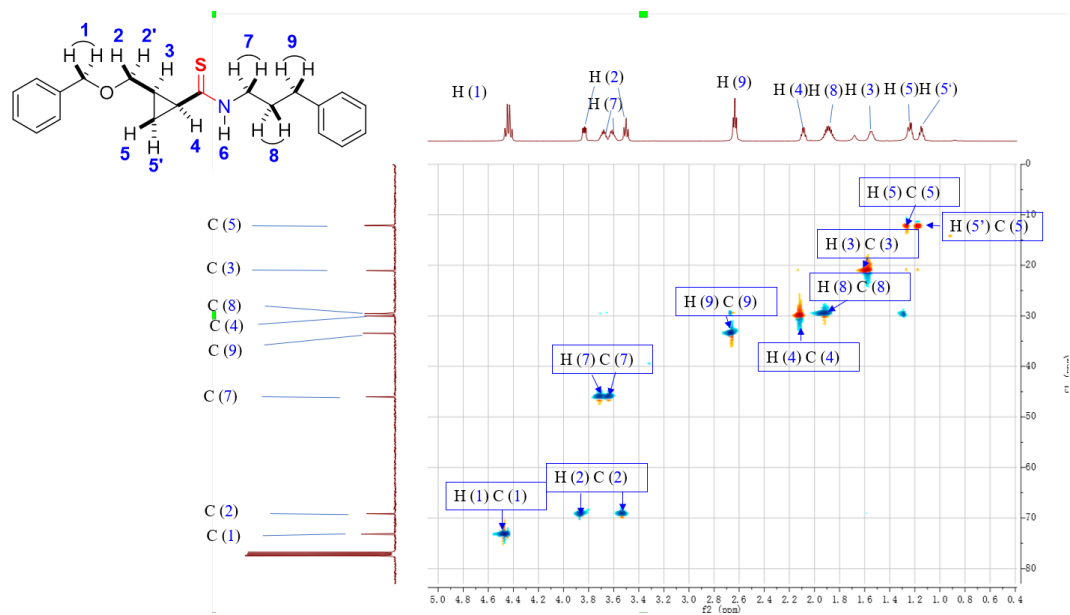

2D HMBC spectrum of **28**:

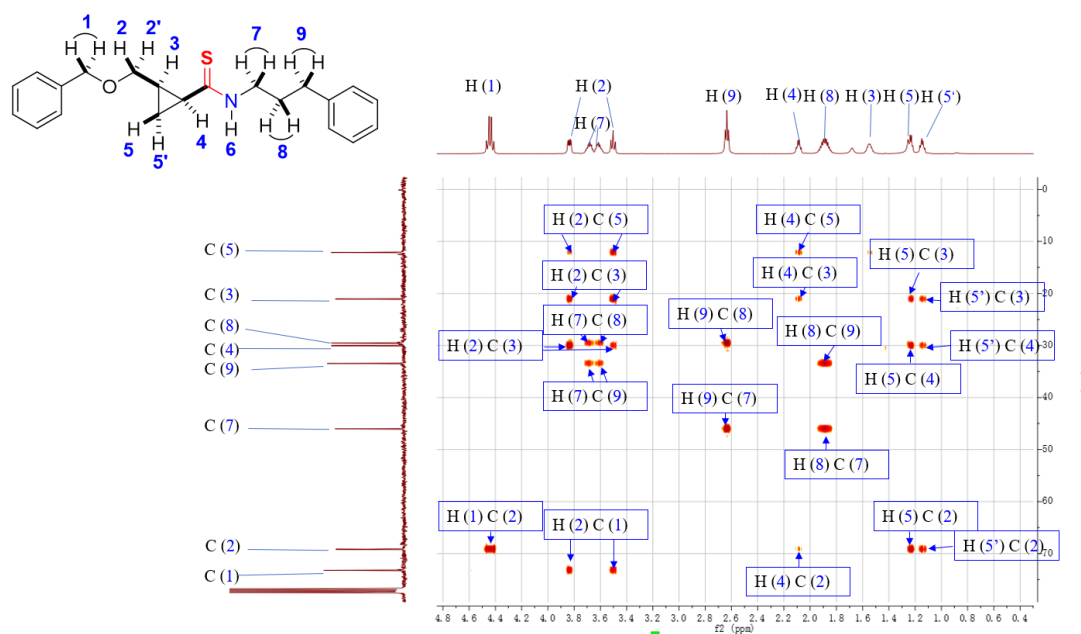

## 5. References

- [1] W.-C. Gao, J. Liu, X. Jiang. *Org. Chem. Front.* **2021**, 8, 1275–1279.
- [2] P. Ramaraju, D. Gergeres, E. Turos, S. Dickey, D. V. Lim, J. Thomas. *Bioorg. Med. Chem. Lett.* **2012**, 22, 3623–3631.
- [3] J. Li, M. J. Lear, Y. Kawamoto, S. Umemiya, A. R. Wong, E. Kwon, I. Sato, Y. Hayashi. *Angew. Chem. Int. Ed.* **2015**, 54, 12986–12990.
- [4] Y.-H. Chen, X.-L. Sun, H.-S. Guan, Y.-K. Liu. *J. Org. Chem.* **2017**, 82, 4774–4783.
- [5] P. G. K. Clark, L. C. C. Vieira, C. Tallant, O. Fedorov, D. C. Singleton, C. M. Rogers, O. P. Monteiro, J. M. Bennett, R. Baronio, S. Müller, D. L. Daniels, J. Méndez, S. Knapp, P. E. Brennan, D. J. Dixon. *Angew. Chem. Int. Ed.* **2015**, 54, 6217–6221.
- [6] A. P. Kozikowski, C. S. Li, *J. Org. Chem.* **1985**, 50, 778–785.
- [7] P. Marcé, J. Lynch, A. J. Blacker, J. M. J. Williams, *Chem. Commun.* **2016**, 52, 1013–1016.
- [8] W. Fitch Richard, D. Sturgeon Gordon, R. Patel Shaun, F. Spande Thomas, H. Martin Garraffo, W. Daly John, and H. B. Richard. *J. Nat. Prod.* **2009**, 72, 243–247.
- [9] T. Hostmann, J. J. Molloy, K. Bussmann, R. Gilmour. *Org. Lett.* **2019**, 21, 10164–10168.
- [10] E. Massolo, M. Benaglia, M. Orlandi, S. Rossi, G. Celentano. *Chem. Eur. J.* **2015**, 21, 3589–3595.
- [11] F. Fini, V. Sgarzani, D. Pettersen, R. P. Herrera, L. Bernardi, A. Ricci, *Angew. Chem. Int. Ed.* **2005**, 44, 7975–7978.
- [12] A. Ferraro, L. Bernardi, M. Fochi, *Adv. Synth. Catal.* **2016**, 358, 1561–1565.
- [13] A. J. Simpson, H. W. Lam, *Org. Lett.* **2013**, 15, 2586–2589.
- [14] C. Zeng, G. Shen, F. Yang, J. Chen, X. Zhang, C. Gu, Y. Zhou, B. Fan. *Org. Lett.* **2018**, 20, 6859–6862.
- [15] H. S. Toogood, A. Fryszkowska, M. Hulley, M. Sakuma, D. Mansell, G. M. Stephens, J. M. Gardiner, N. S. Scrutton. *Chem. Bio. Chem.* **2011**, 12, 738–749.
- [16] B. Wang, Y. Liu, C. Sun, Z. Wei, J. Cao, D. Liang, Y. Lin, H. Duan, *Org. Lett.* **2014**, 16, 6432–6435.
- [17] M. Holmquist, G. Blay, J. R. Pedro, *Chem. Commun.* **2014**, 50, 9309–9312.
- [18] J. A. Burkhard, B. H. Tchitchanov, E. M. Carreira. *Angew. Chem. Int. Ed.* **2011**, 50, 5379–5382.
- [19] R. R. Walvoord, M. C. Kozlowski. *J. Org. Chem.* **2013**, 78, 8859–8864.
- [20] M.Y. Cao, B. J. Ma, Q. X. Gu, B. Fu, H. H. Lu. *J. Am. Chem. Soc.* **2022**, 144, 5750–5755.
- [21] T. Lincke, S. Behnken, K. Ishida, M. Roth, C. Hertweck. *Angew. Chem. Int. Ed.* **2010**, 49, 2011–2013.
- [22] C. Wang, Y.-F. Zhang, S. Guo, Q. Zhao, Y. Zeng, Z. Xie, X. Xie, B. Lu, Y. Hu, *J. Med. Chem.* **2021**, 64, 941–957.
- [23] N. Taniguchi, *Synlett* **2007**, 2007, 1917–1920.
- [24] M. S. Crocker, H. Foy, K. Tokumaru, T. Dudding, M. Pink, J. N. Johnston, *Chem* **2019**, 5, 1248–1264.

## SUPPORTING INFORMATION

---

- [25] C. Palomo, A. Landa, A. Mielgo, M. Oiarbide, Á. Puente, S. Vera. *Angew. Chem. Int. Ed.* **2007**, *46*, 8431–8435.
- [26] S. Umemiya, K. Nishino, I. Sato, Y. Hayashi. *Chem. Eur. J.* **2014**, *20*, 15753–15759.

## SUPPORTING INFORMATION

### 6. NMR spectra

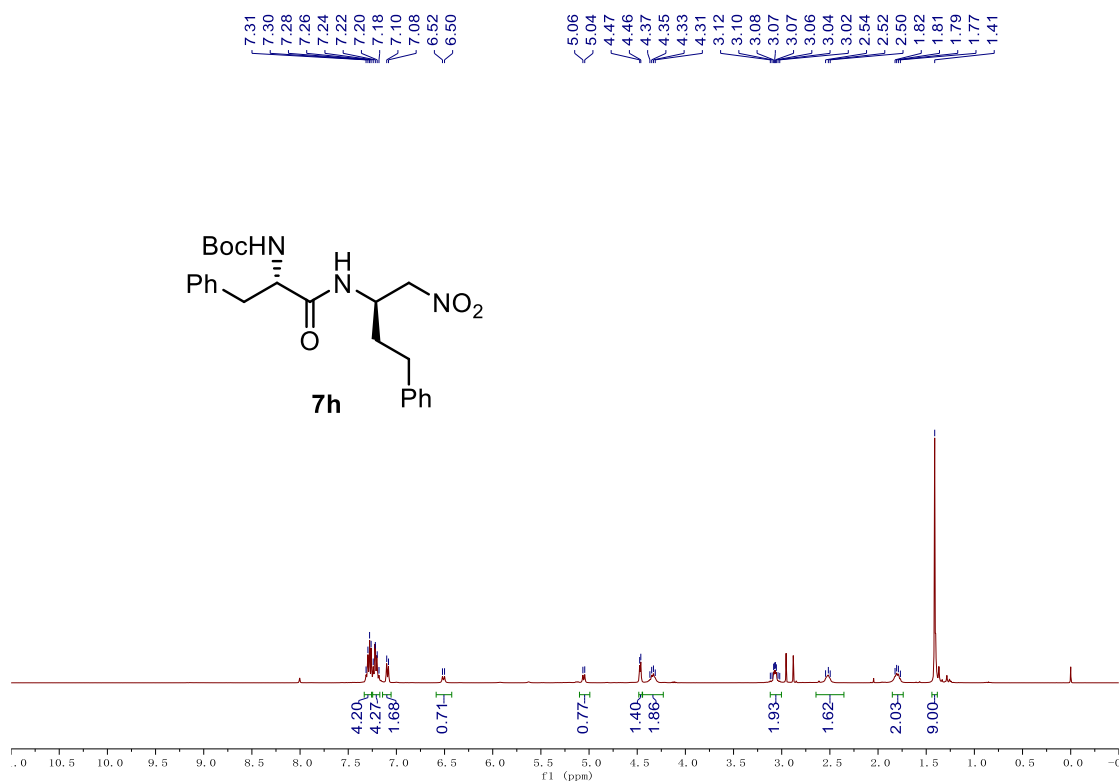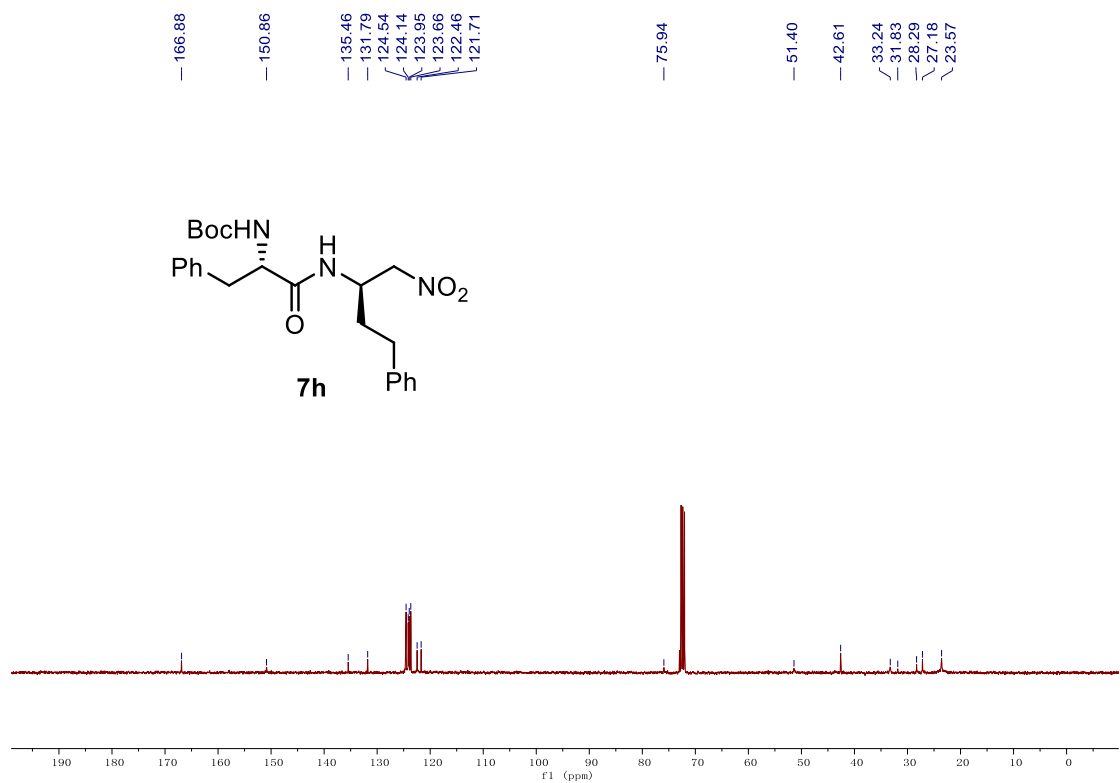



# SUPPORTING INFORMATION

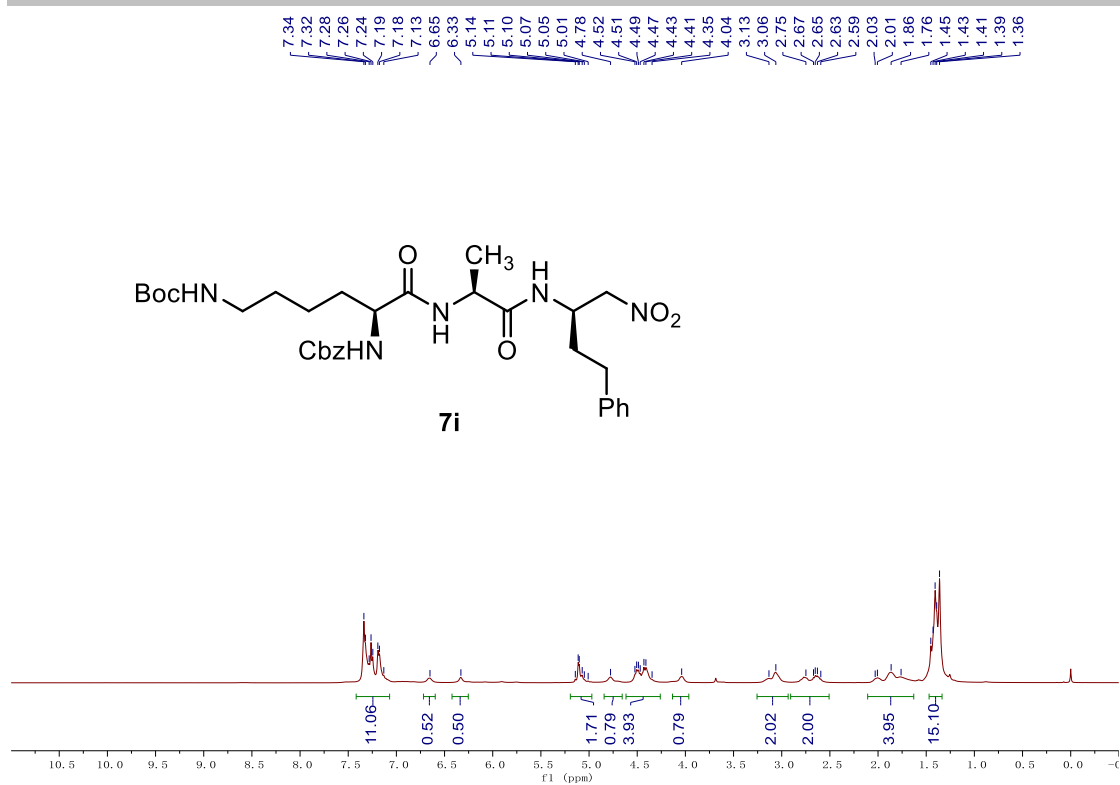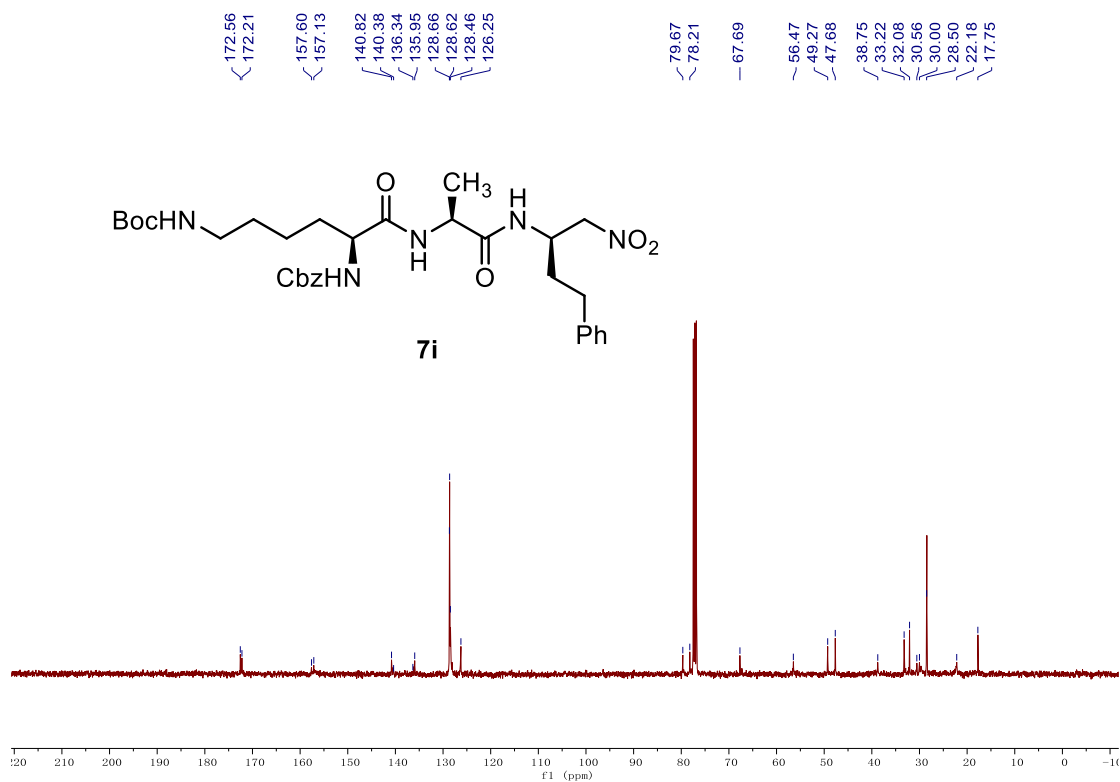

# SUPPORTING INFORMATION

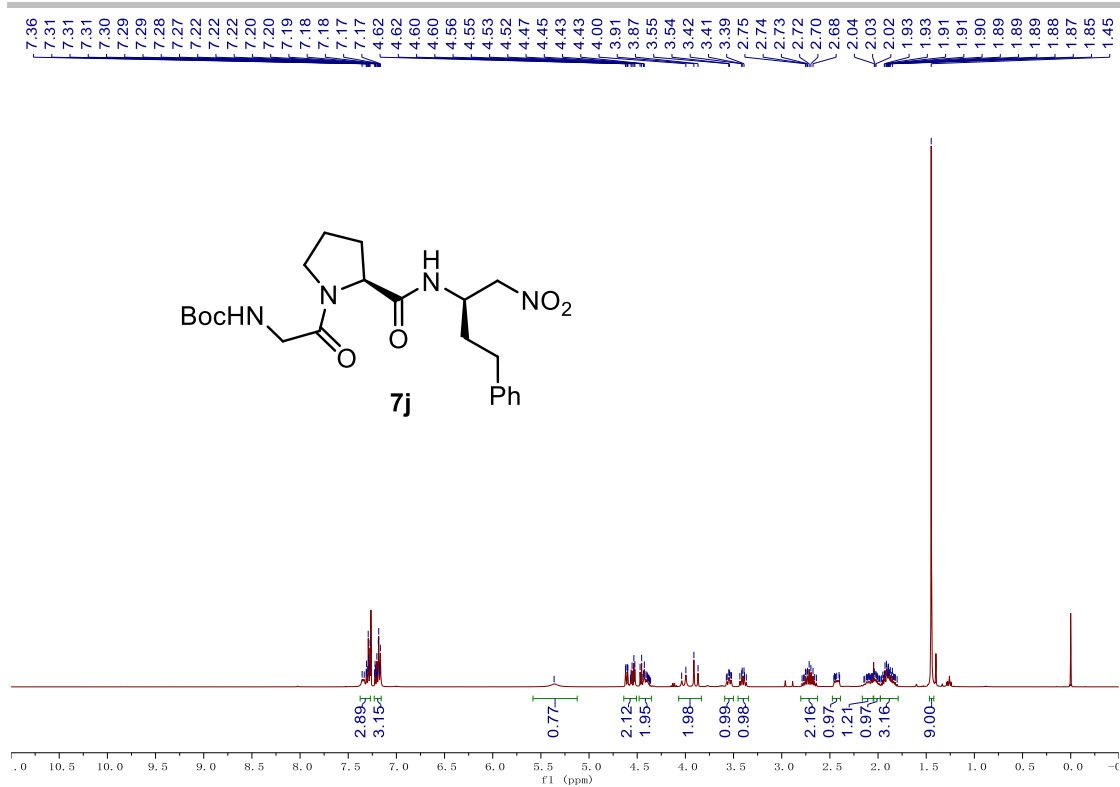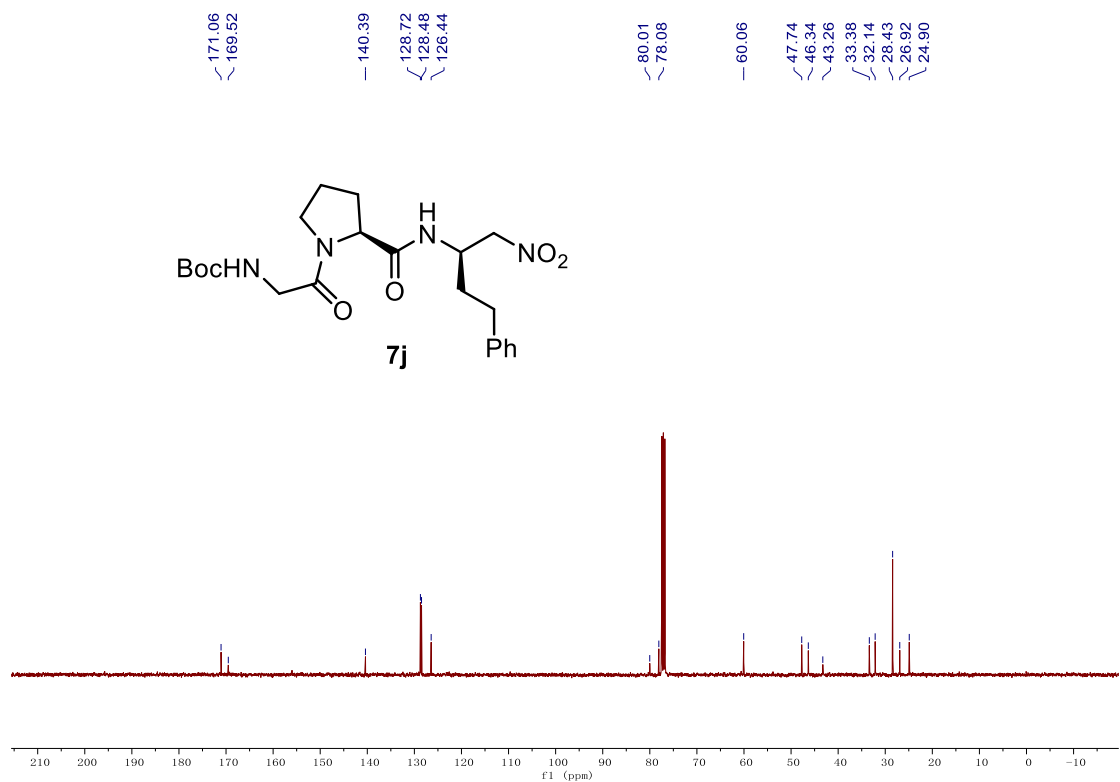

# SUPPORTING INFORMATION

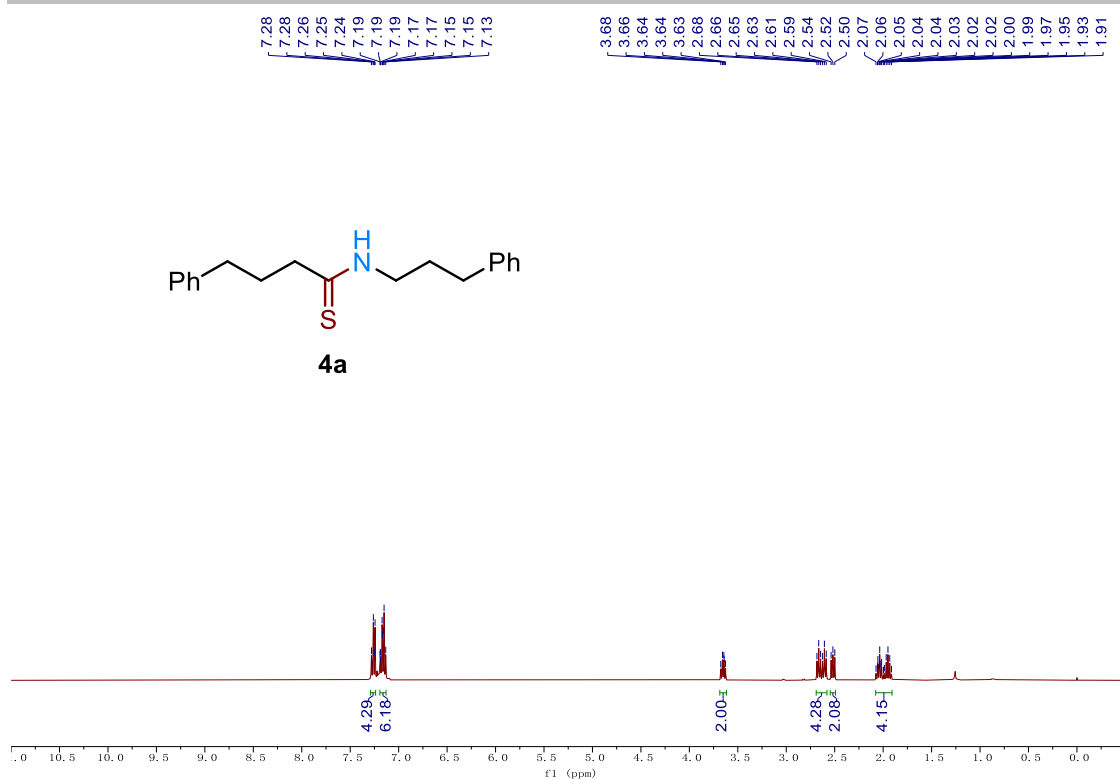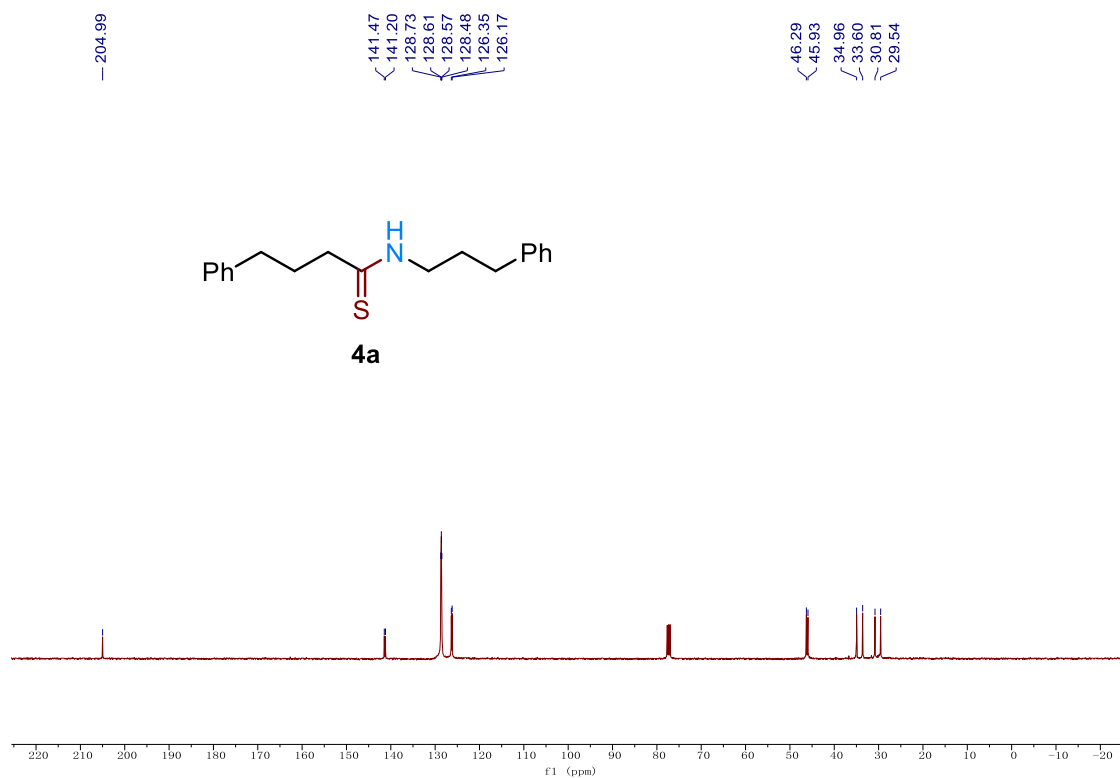

## SUPPORTING INFORMATION

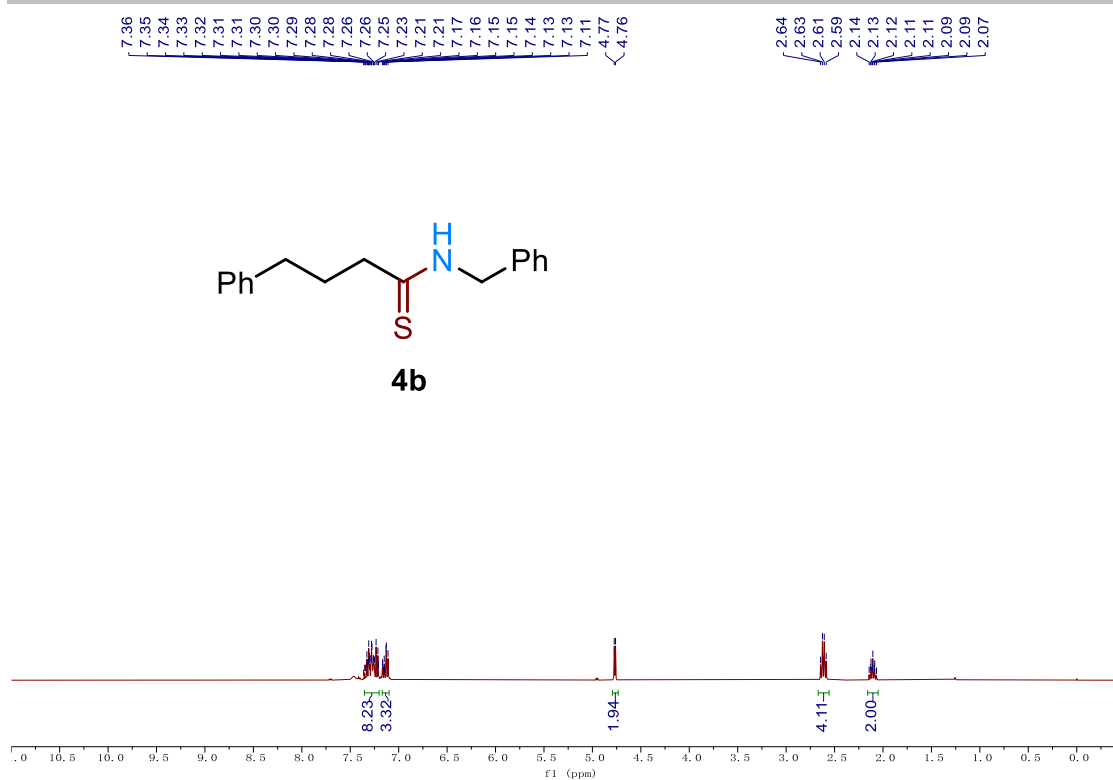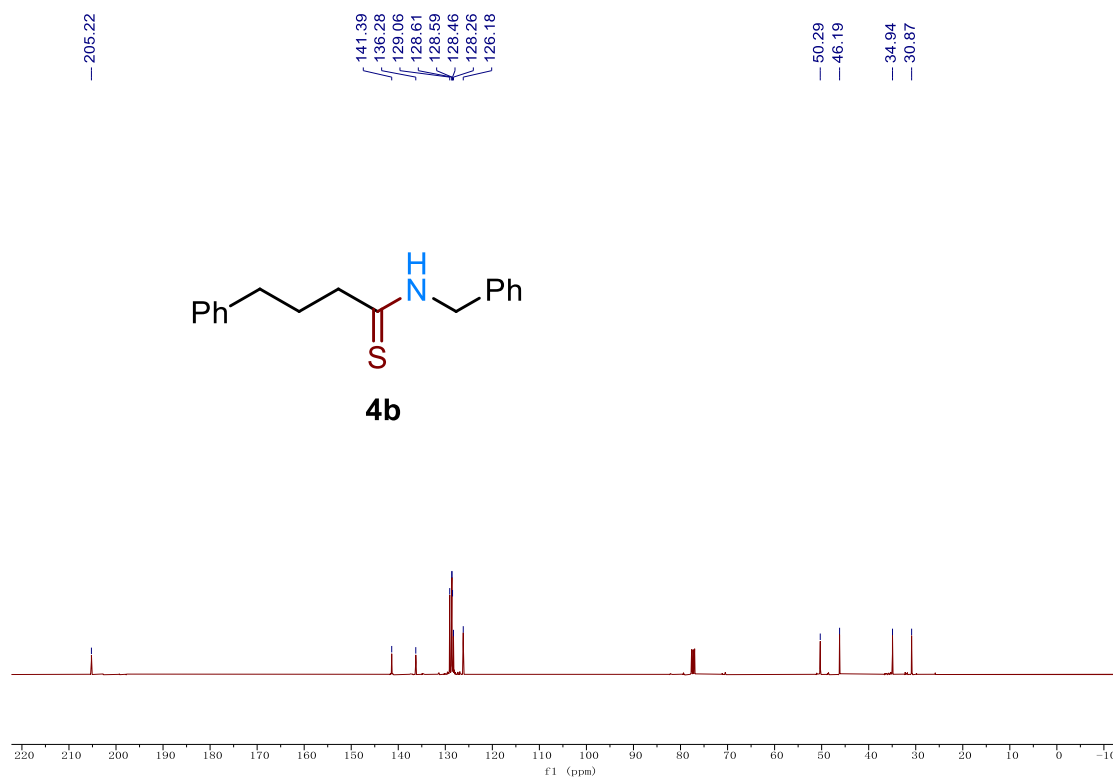

# SUPPORTING INFORMATION

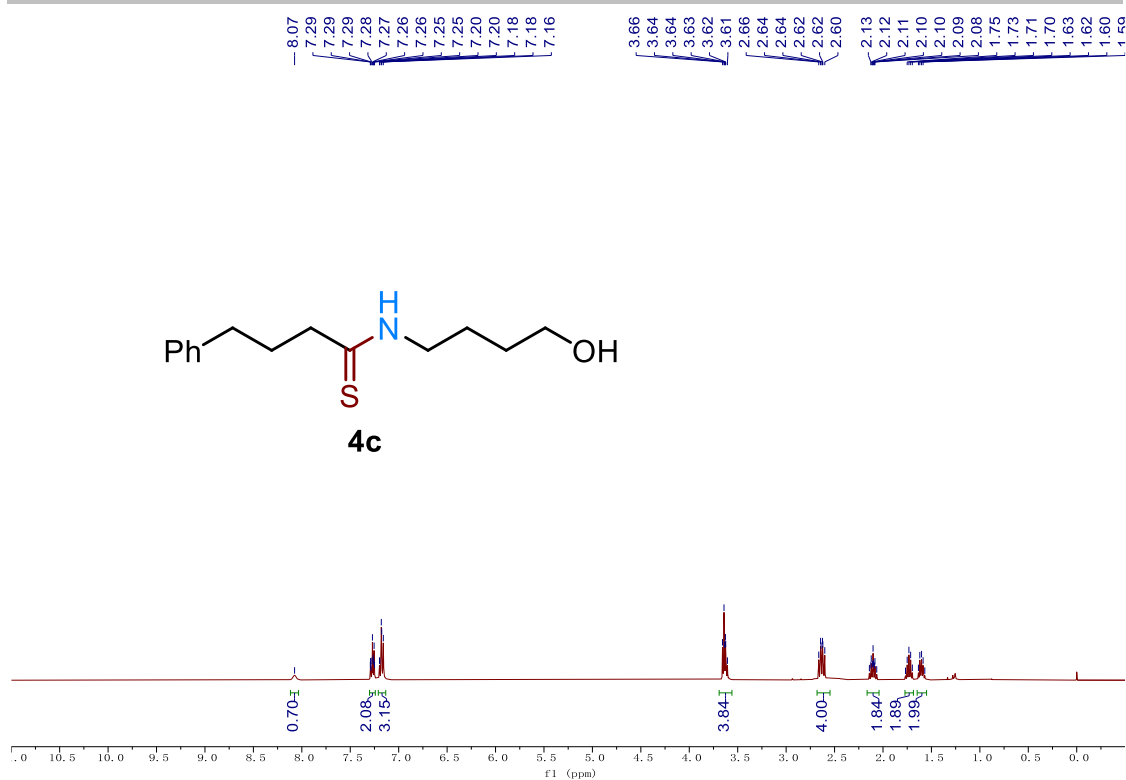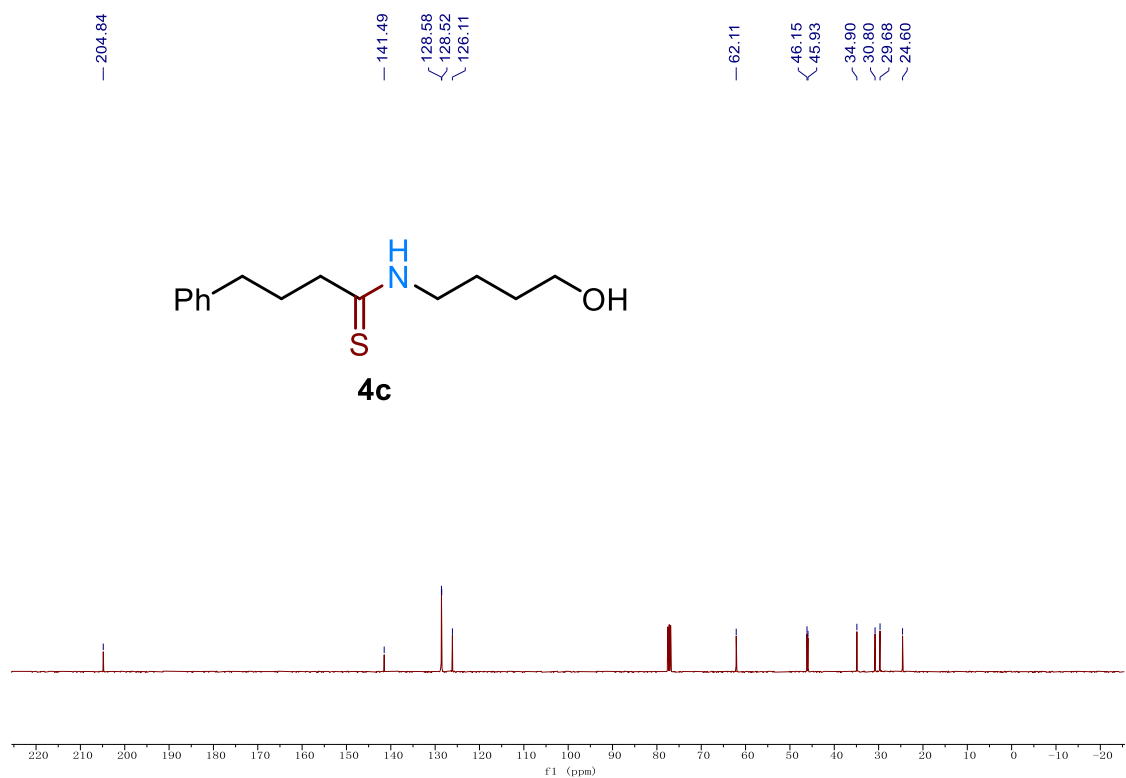

| Age Group | Number of People |
|-----------|------------------|
| 0-14      | 7.29             |
| 15-24     | 7.28             |
| 25-34     | 7.27             |
| 35-44     | 7.25             |
| 45-54     | 7.20             |
| 55-64     | 7.18             |
| 65+       | 7.17             |

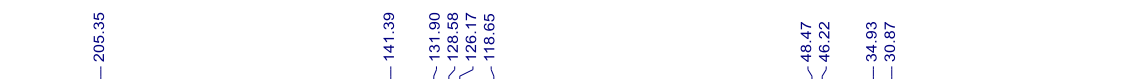

# SUPPORTING INFORMATION

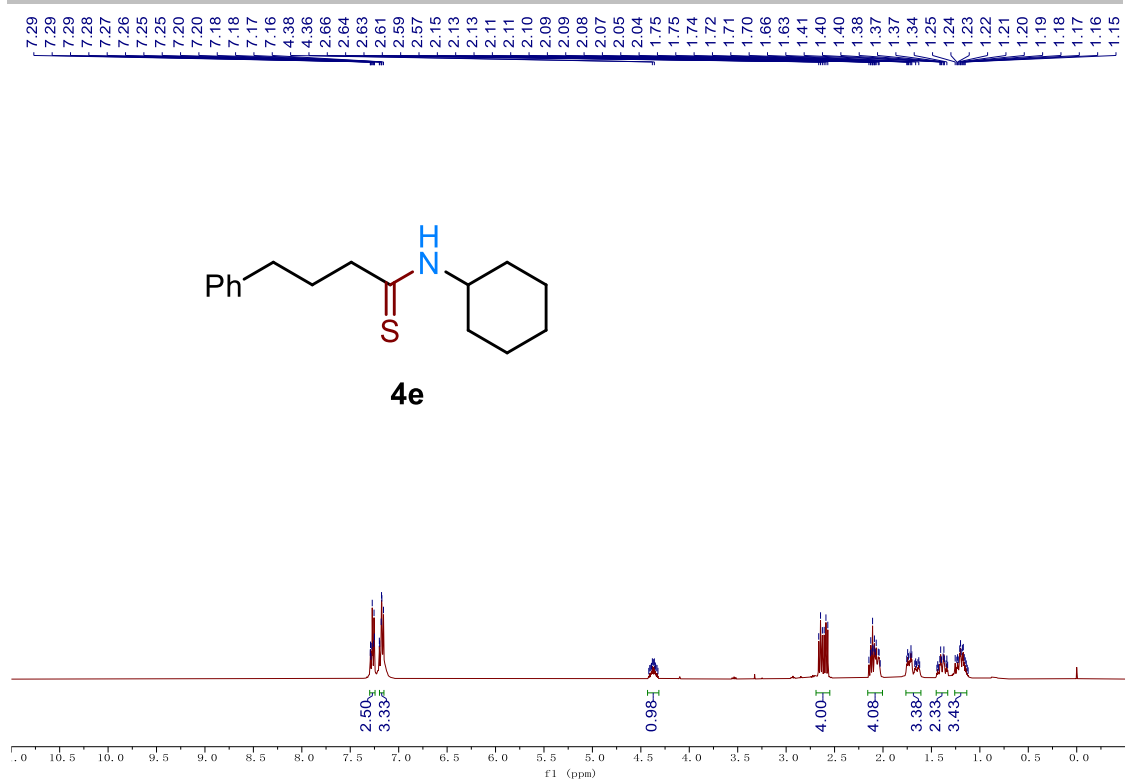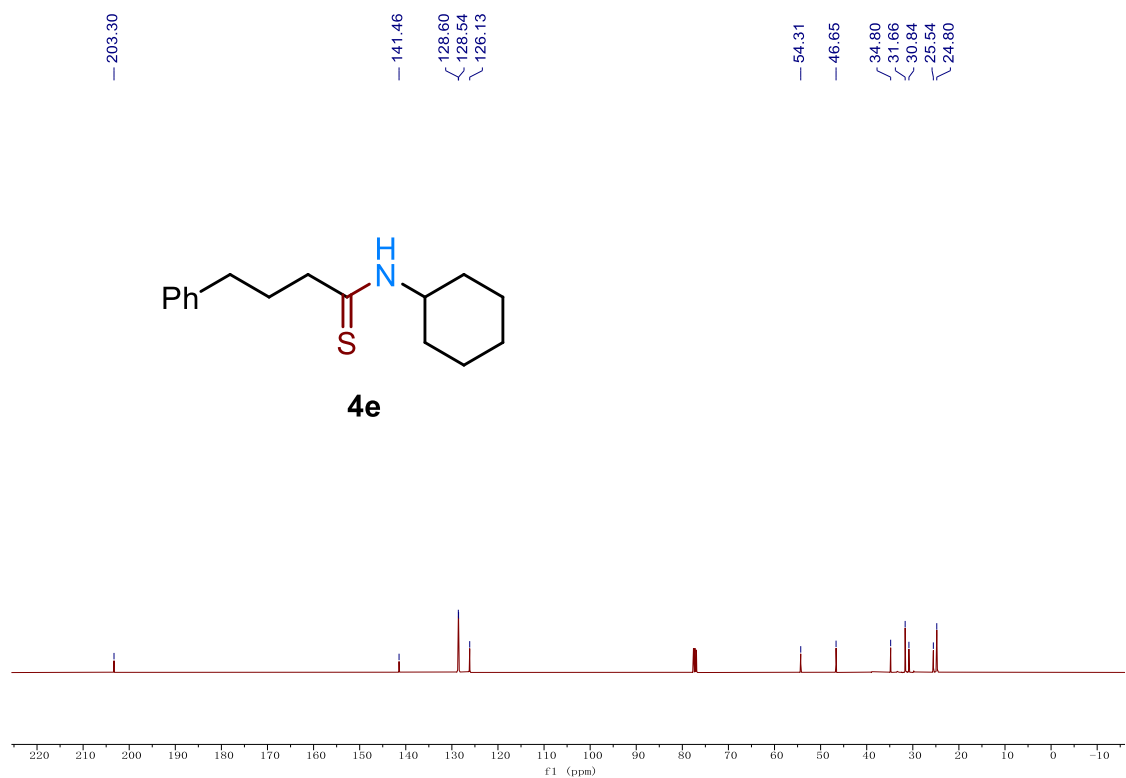

# SUPPORTING INFORMATION

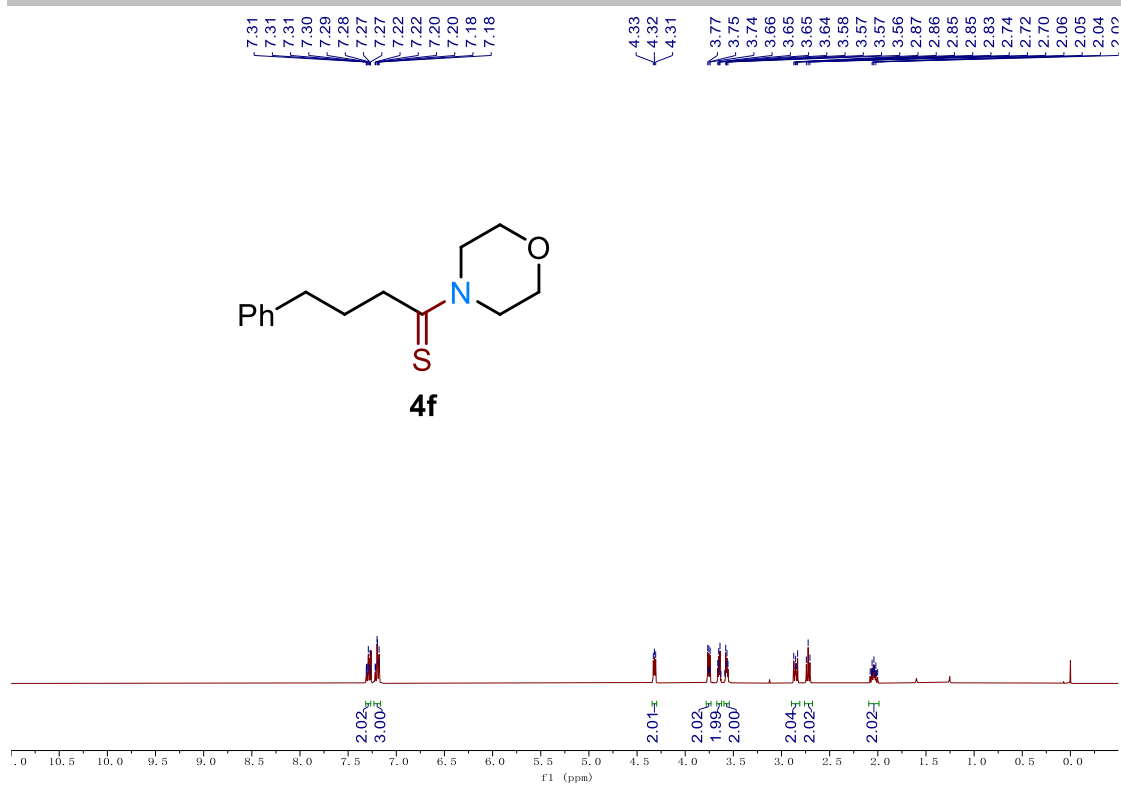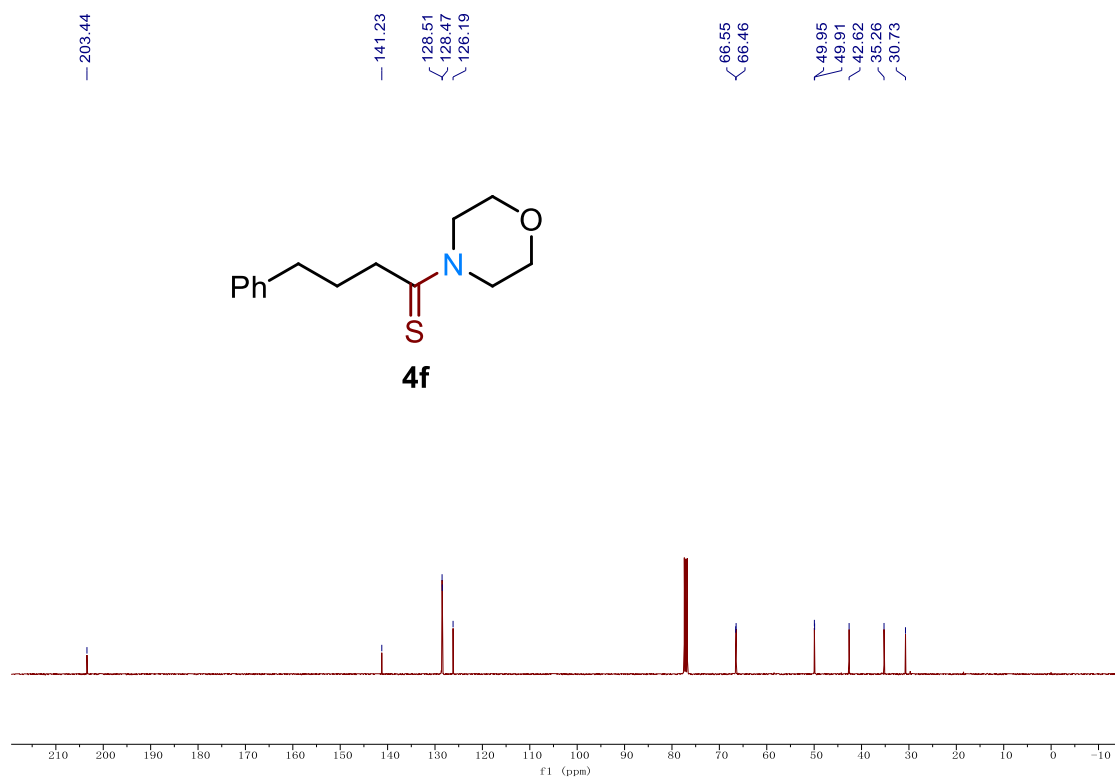



# SUPPORTING INFORMATION

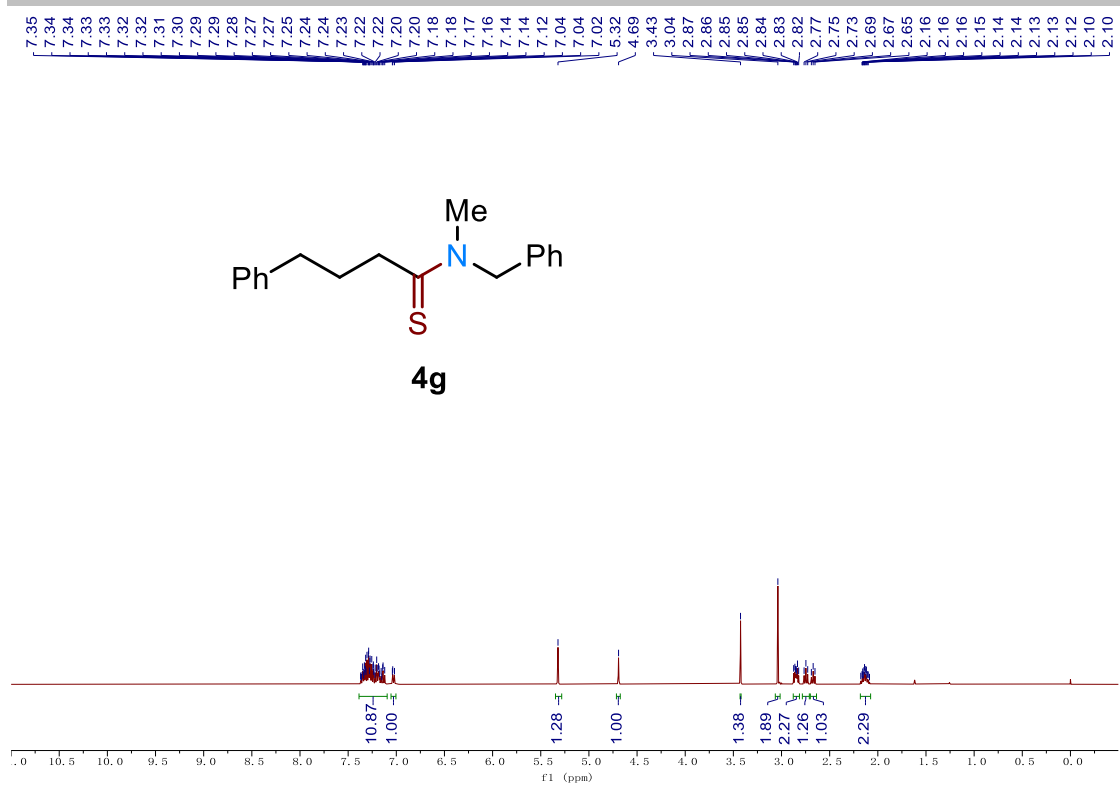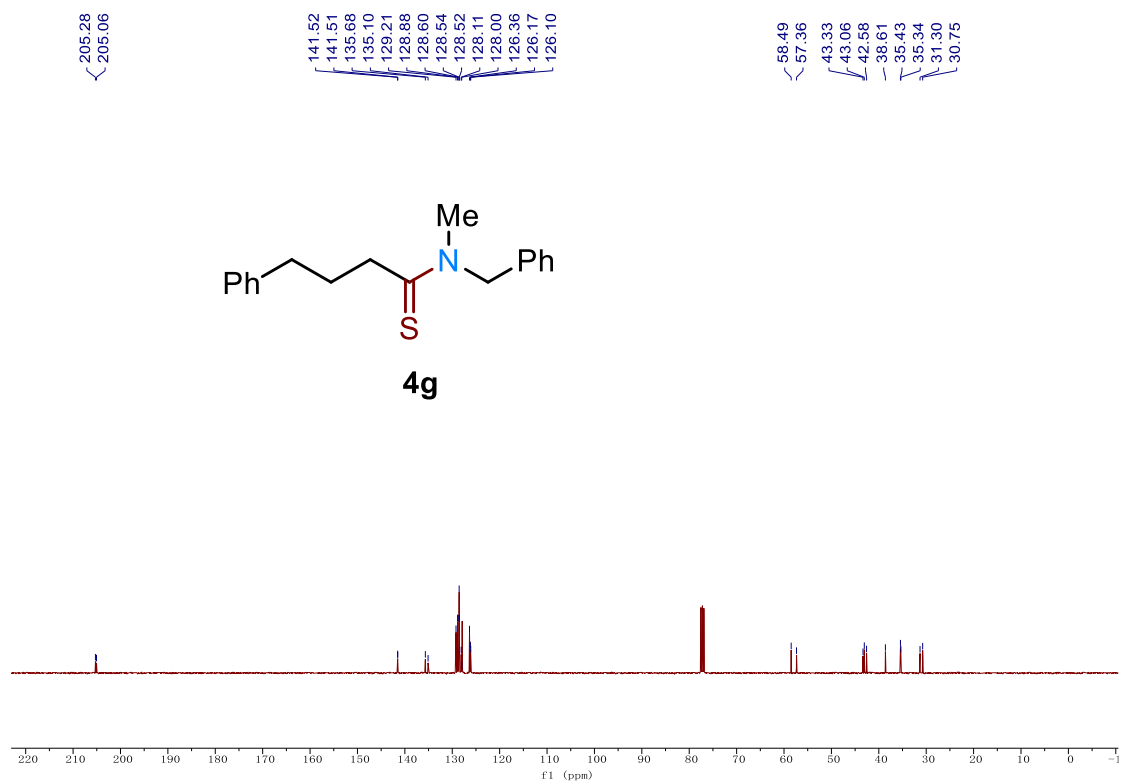

# SUPPORTING INFORMATION

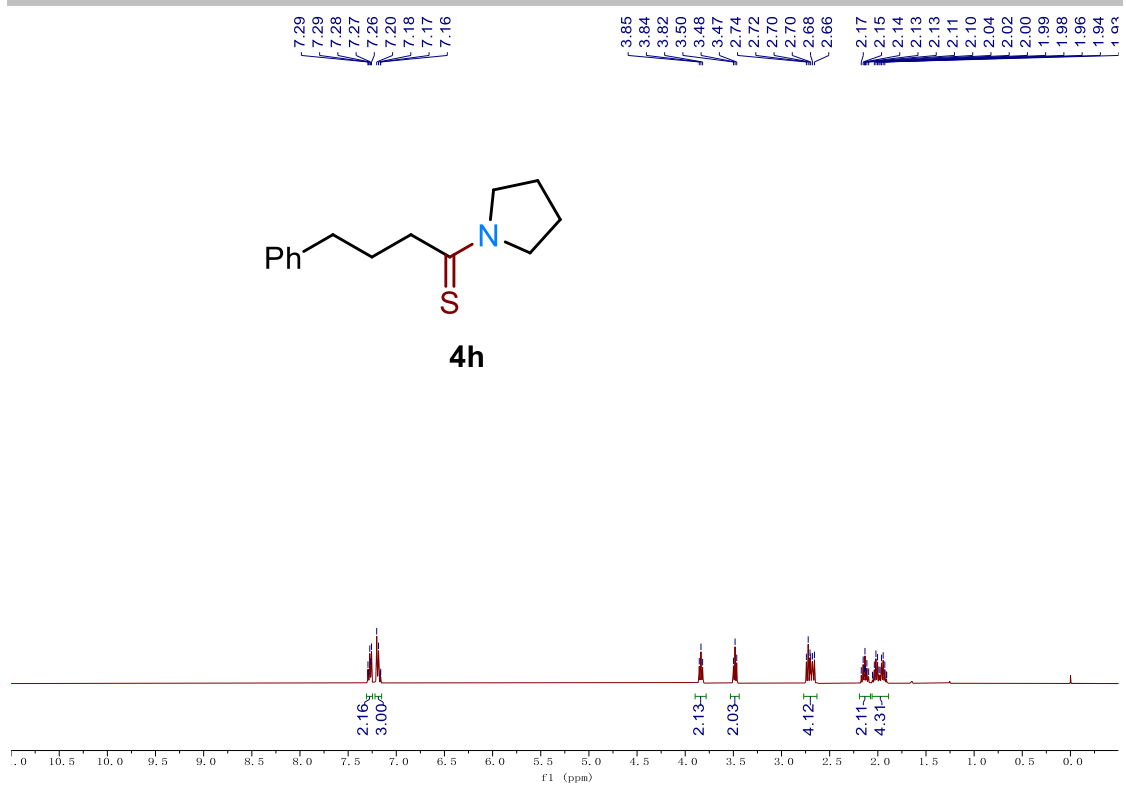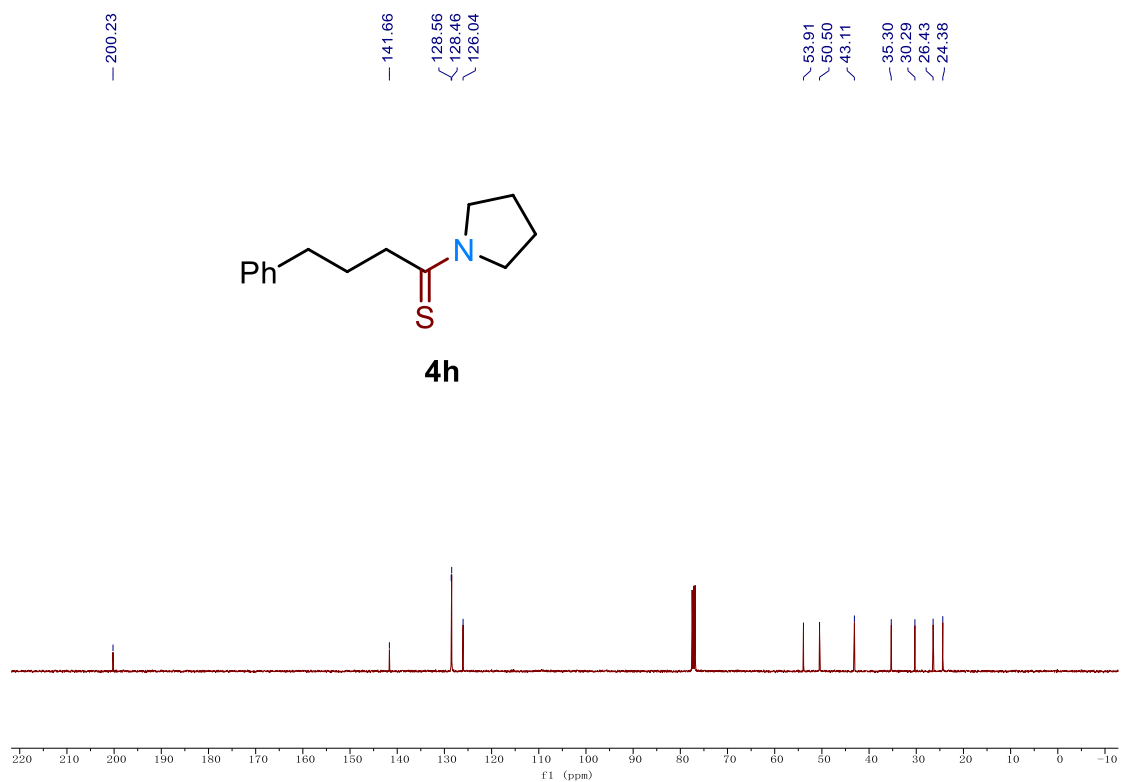

# SUPPORTING INFORMATION

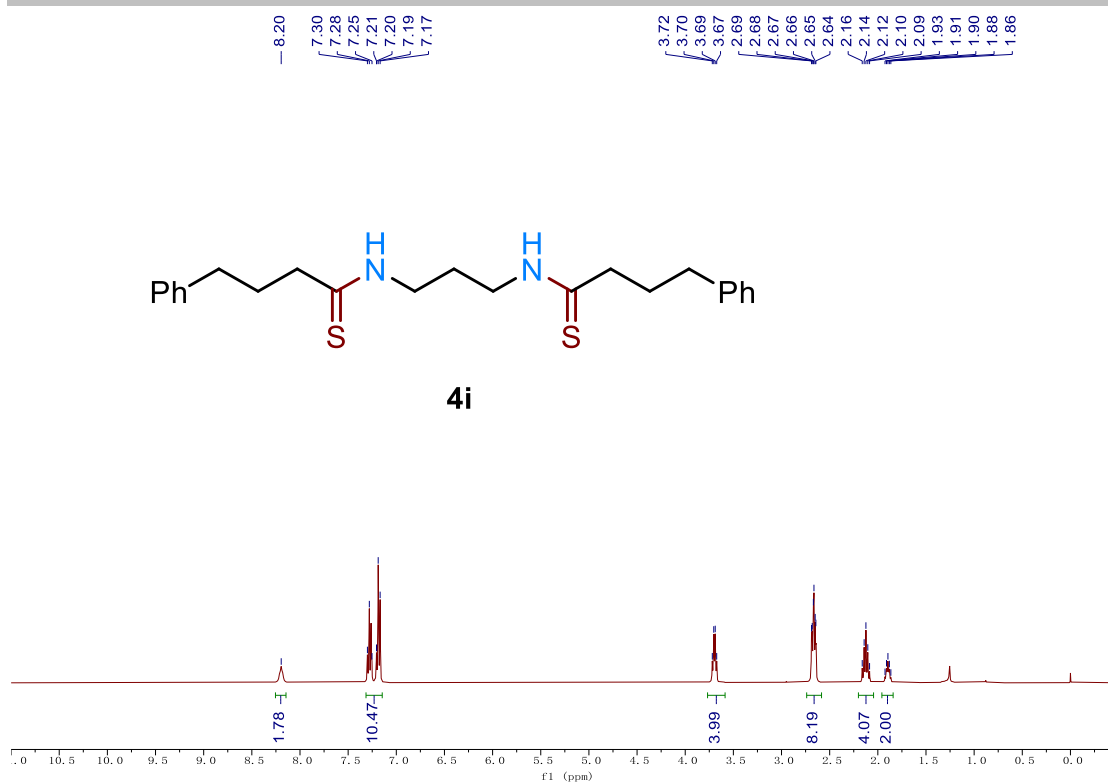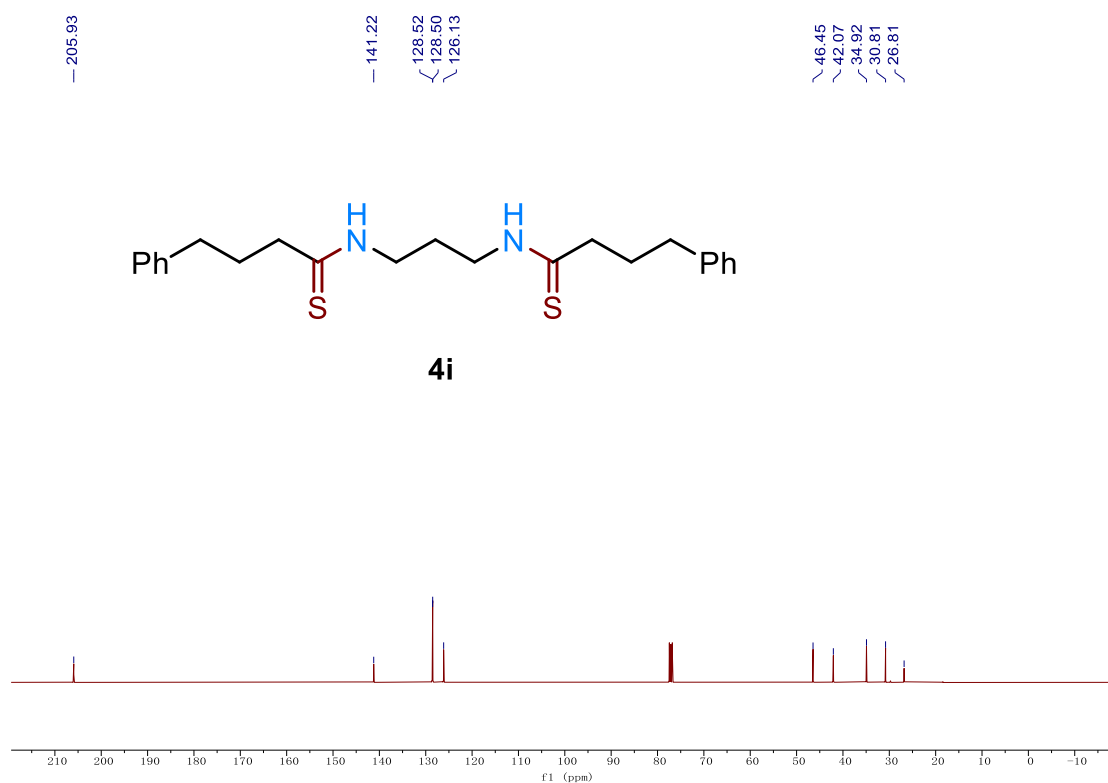

# SUPPORTING INFORMATION

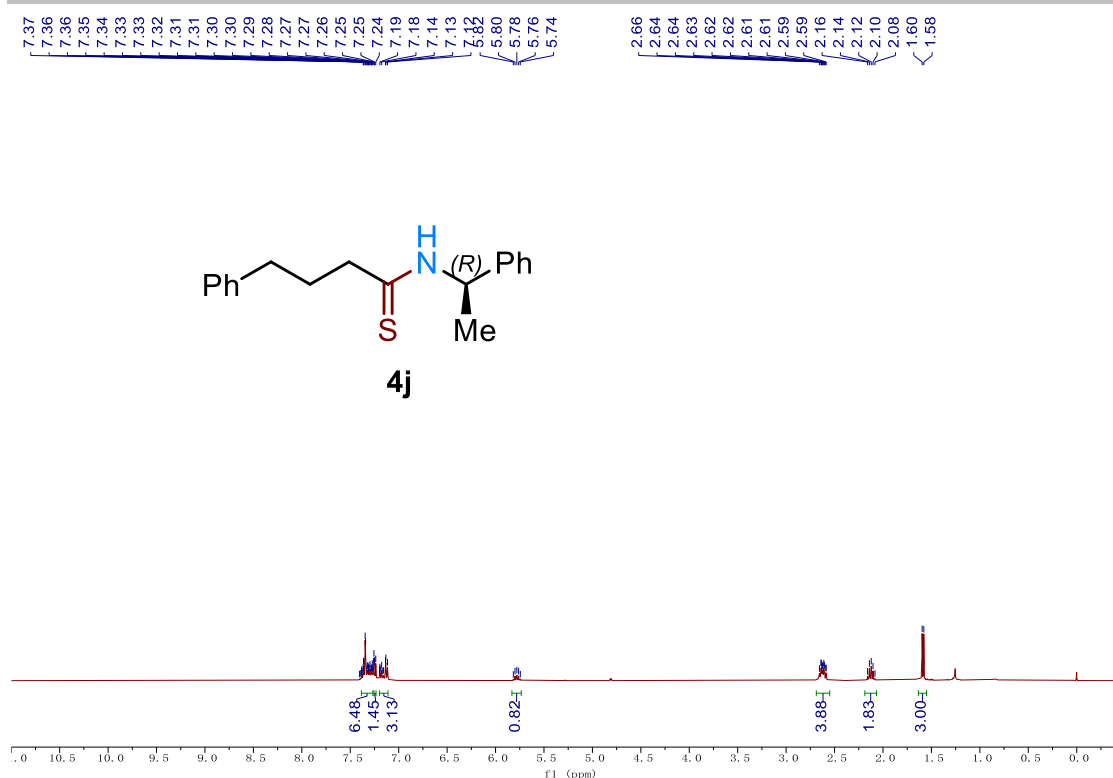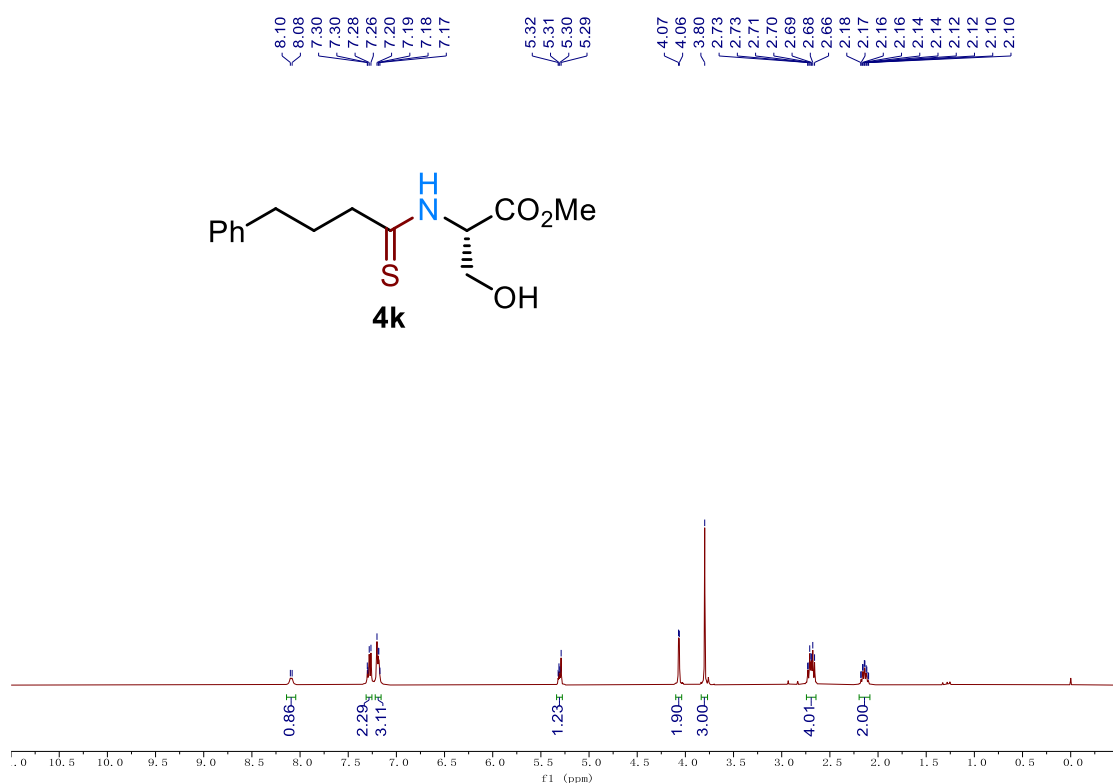

# SUPPORTING INFORMATION

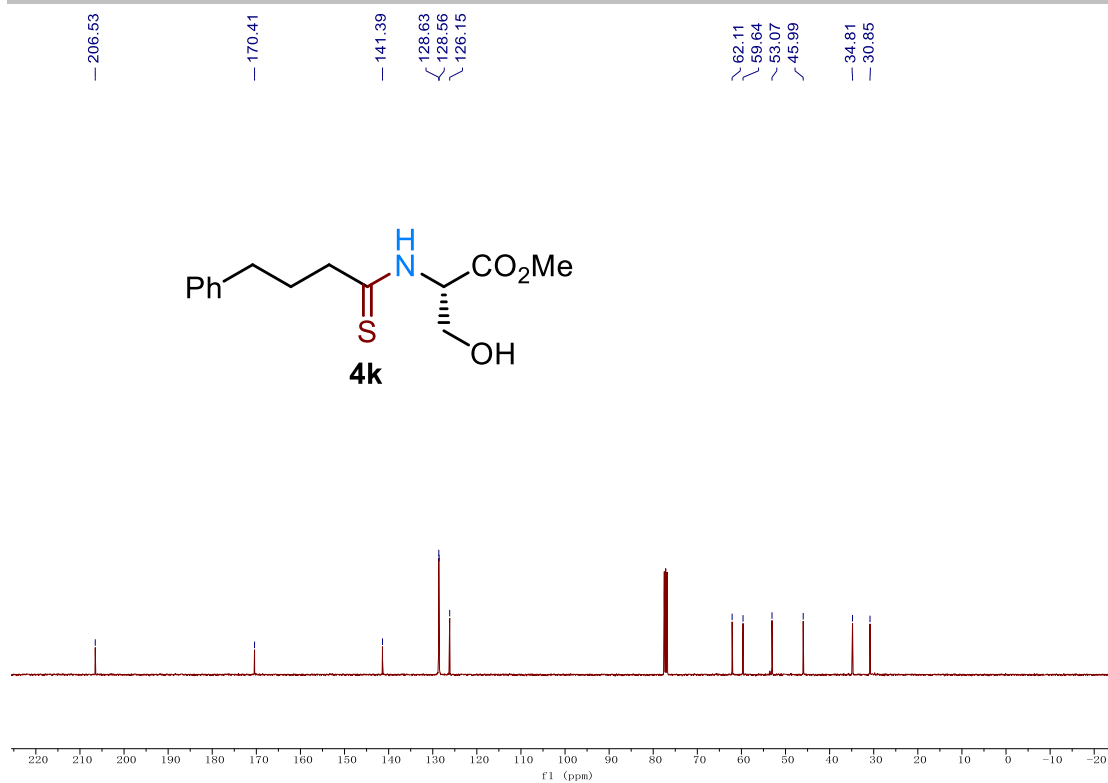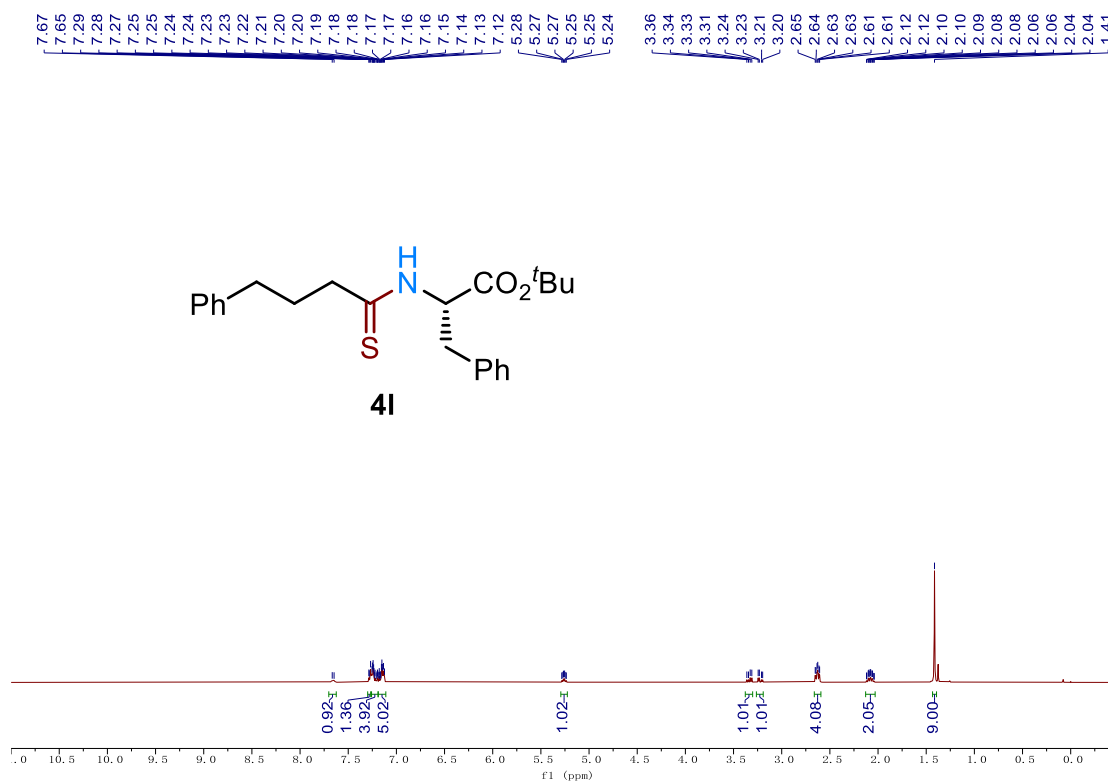

# SUPPORTING INFORMATION

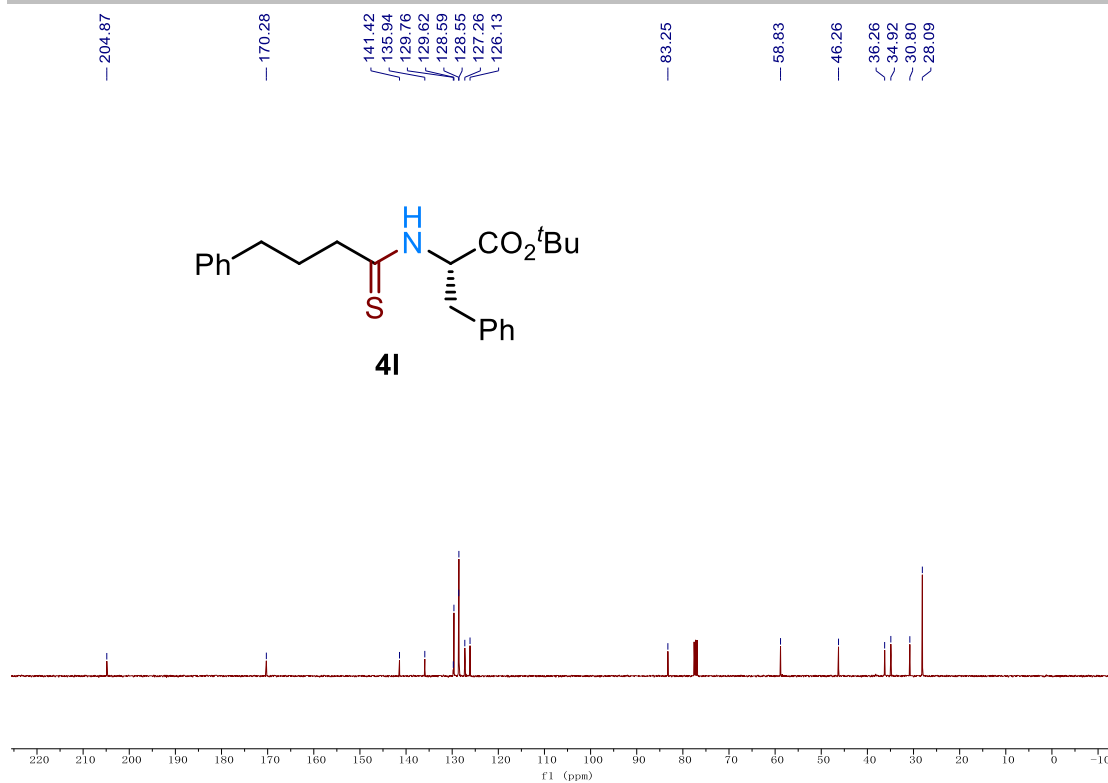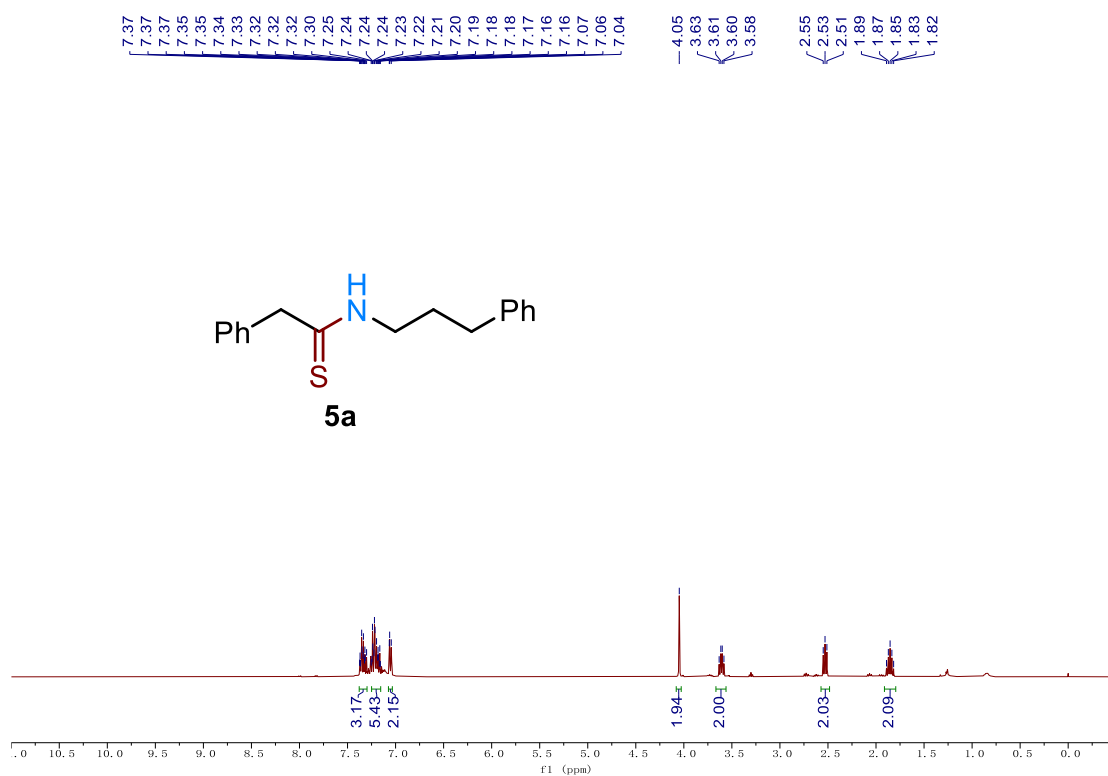

# SUPPORTING INFORMATION

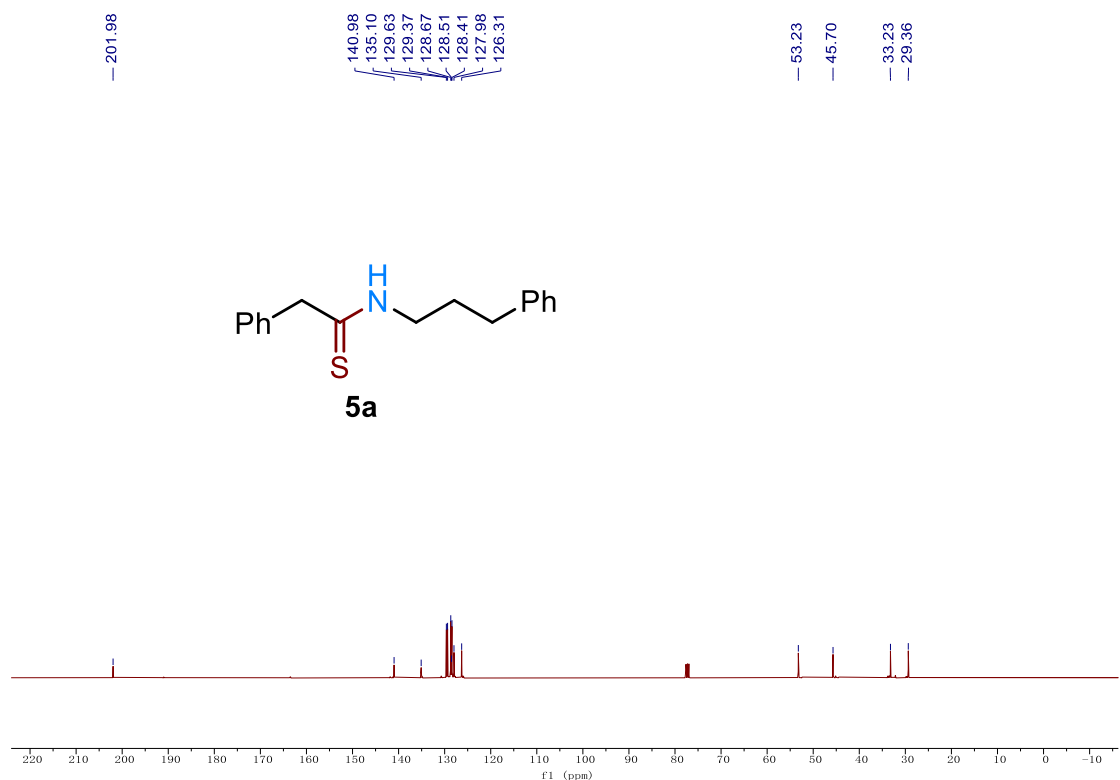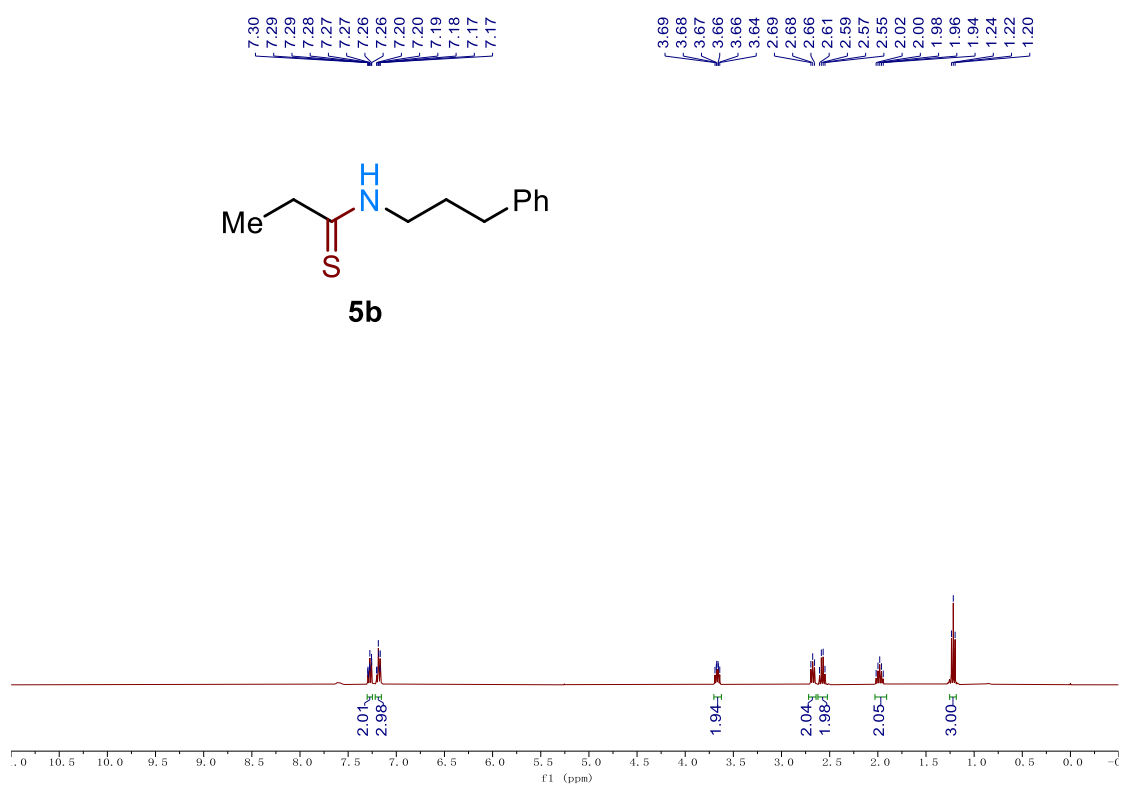

# SUPPORTING INFORMATION

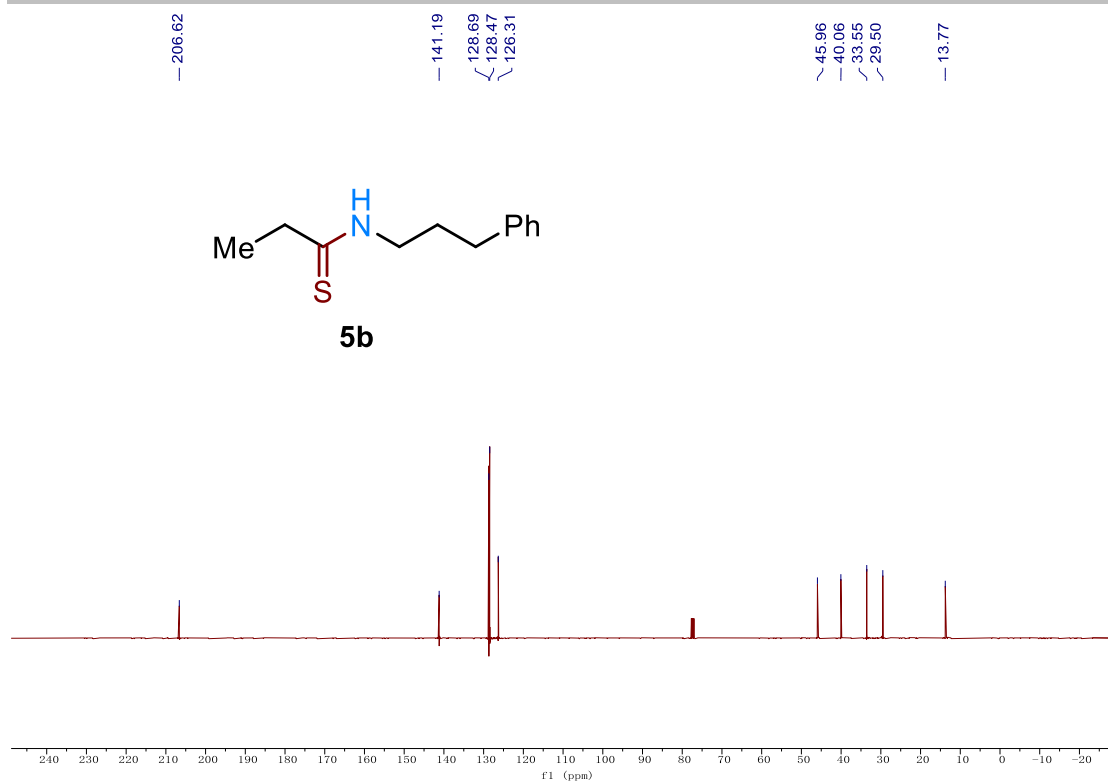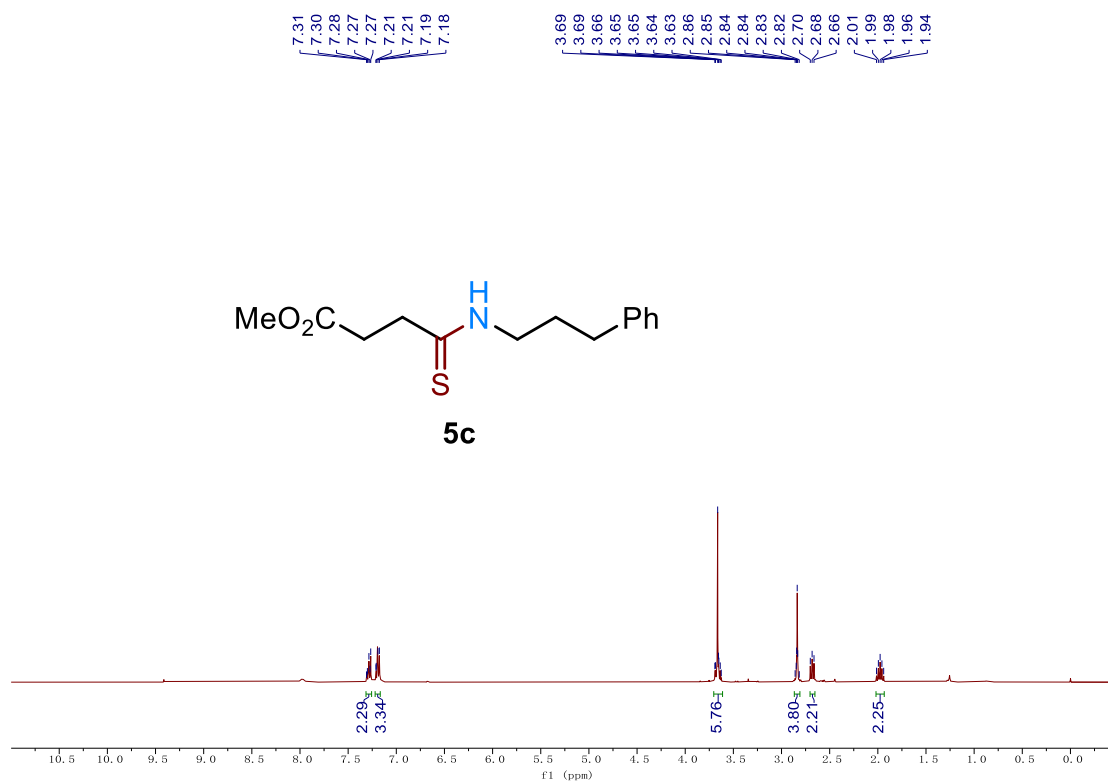



# SUPPORTING INFORMATION

— 203.14

— 174.02

— 141.18

128.63

128.45

126.24

52.07

45.88

40.76

33.36

32.85

29.50

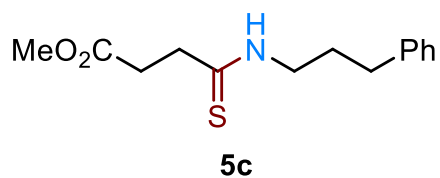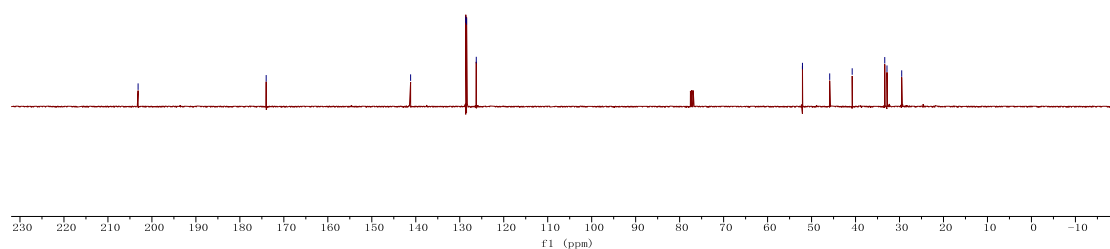

7.29, 7.29, 7.28, 7.28, 7.26, 7.25, 7.20, 7.20, 7.18, 7.16, 5.14, 5.13, 5.11, 3.99, 3.97, 3.97, 3.96, 3.95, 3.93, 3.91, 3.88, 3.86, 3.87, 3.87, 3.85, 3.69, 3.67, 3.67, 3.66, 3.65, 3.64, 3.04, 3.03, 2.70, 2.68, 2.66, 2.01, 2.00, 1.98, 1.96, 1.94

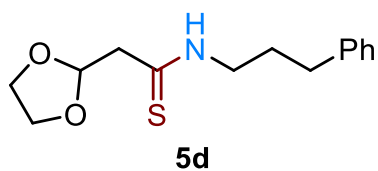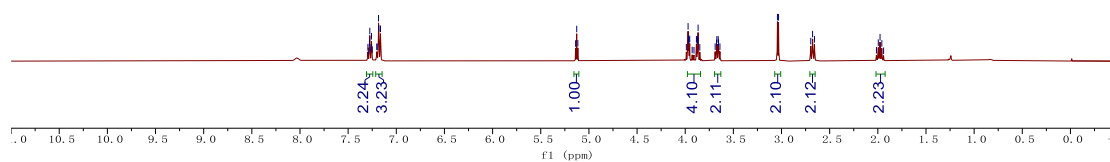

# SUPPORTING INFORMATION

— 198.13

— 141.13

128.64  
128.46  
126.25

— 102.25

— 65.11

— 50.90  
— 45.86

— 33.34  
— 29.54

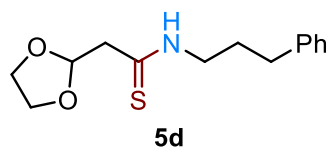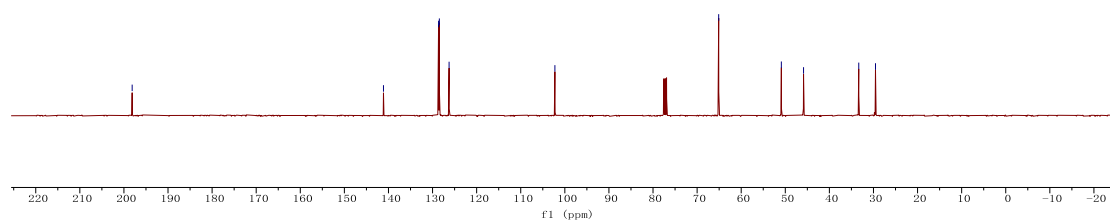

7.81  
7.32  
7.32  
7.31  
7.30  
7.30  
7.28  
7.28  
7.23  
7.23  
7.22  
7.21  
7.20  
7.19  
7.18  
7.17  
7.15  
7.15  
3.93  
3.91  
3.90  
3.72  
3.70  
3.69  
3.68  
3.67  
2.76  
2.75  
2.73  
2.73  
2.71  
2.69  
2.04  
2.03  
2.01  
1.99  
1.97

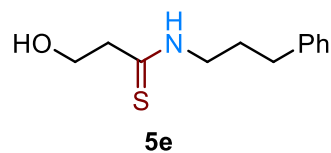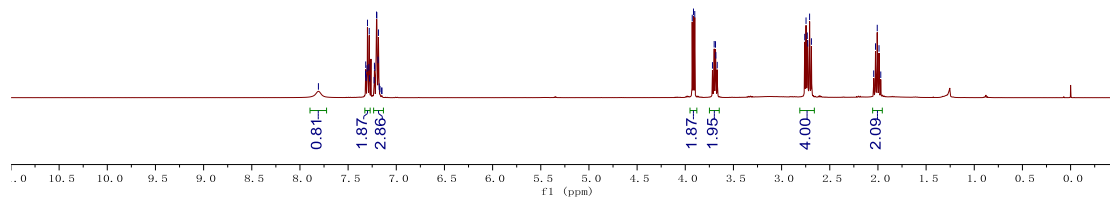

# SUPPORTING INFORMATION

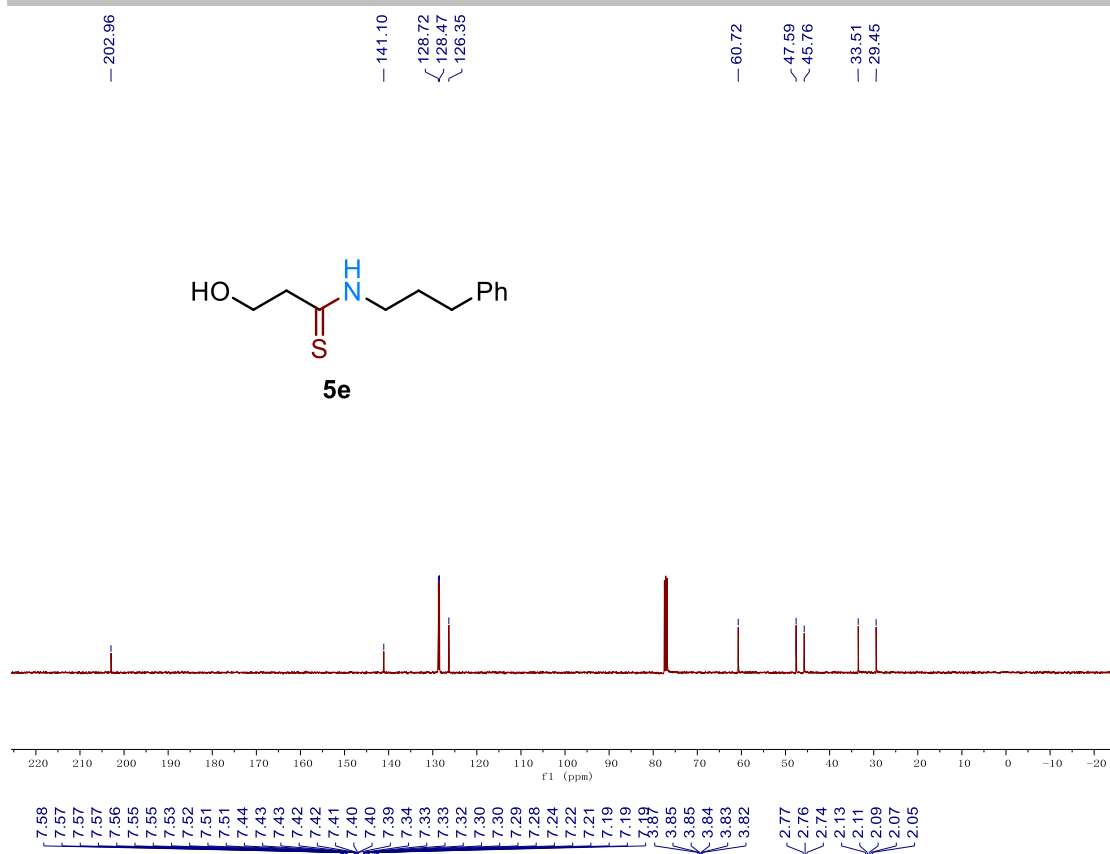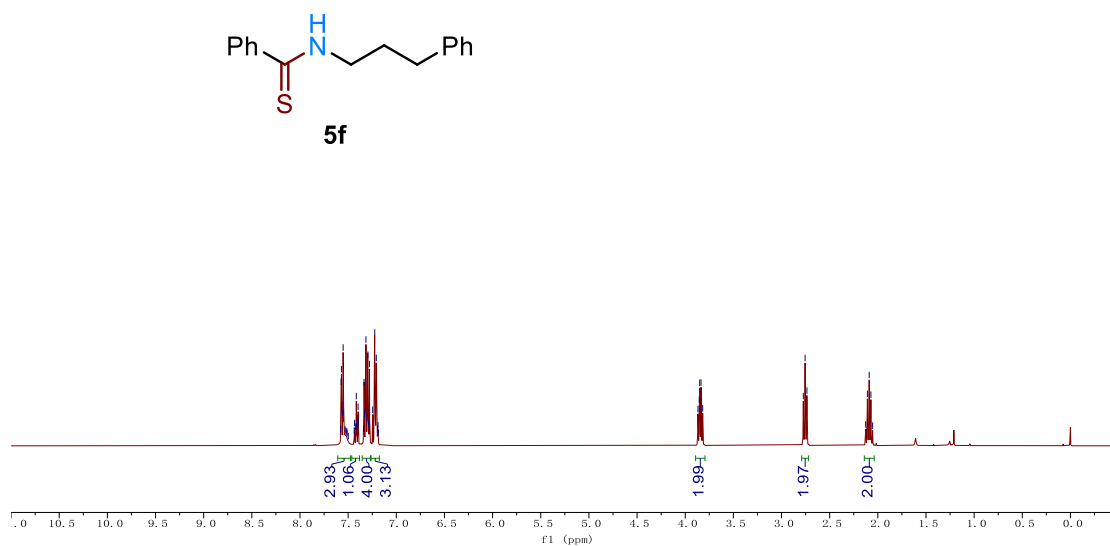

# SUPPORTING INFORMATION

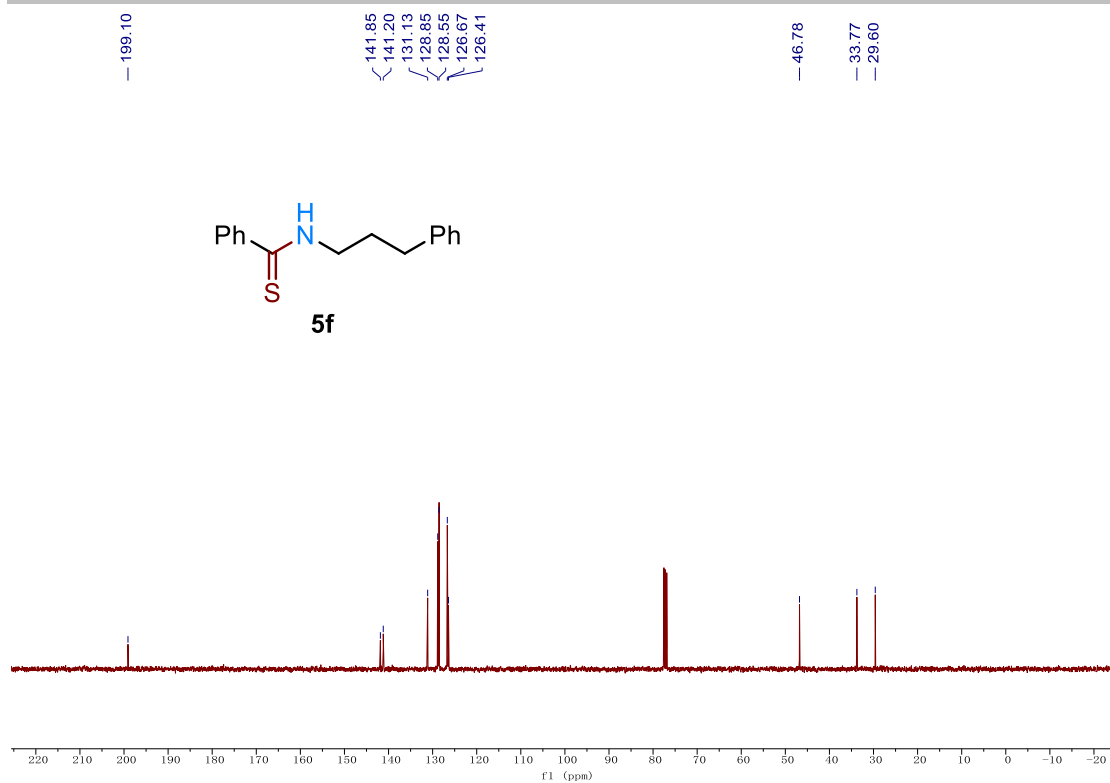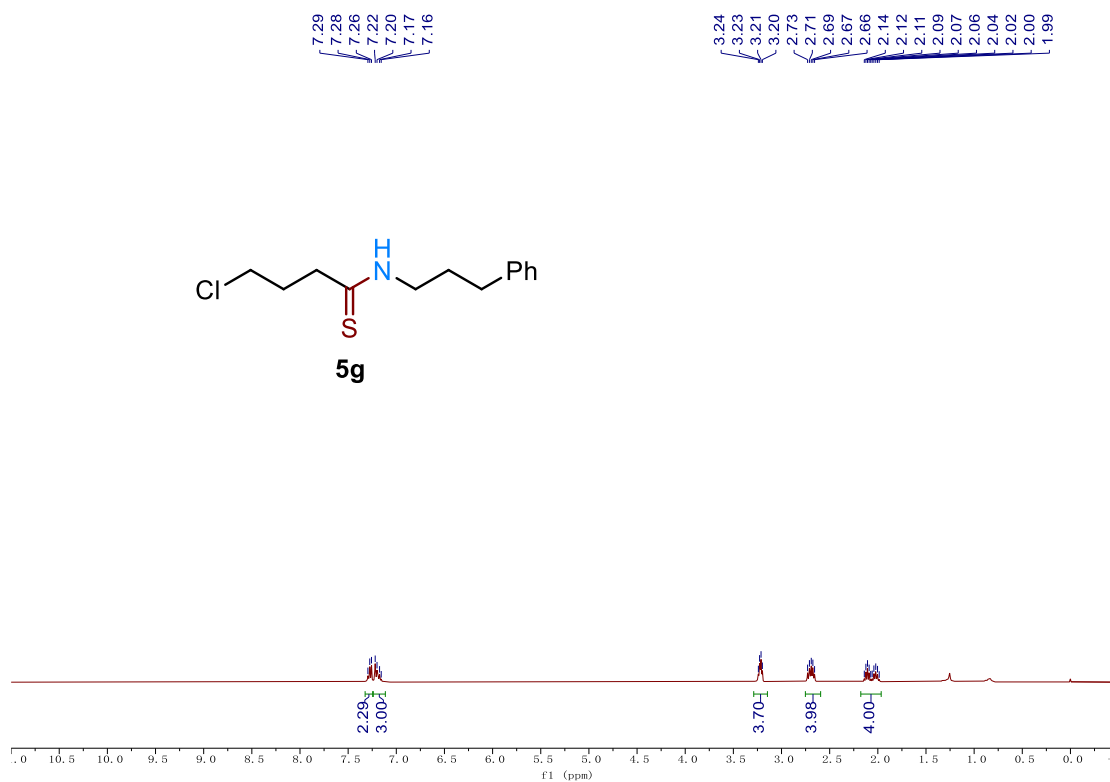

# SUPPORTING INFORMATION

— 173.18 — 142.18 128.50 128.29 125.70 — 57.19 38.80 33.79 33.77 31.93 26.97

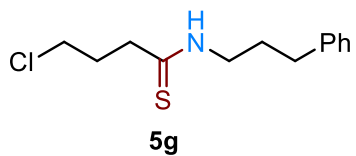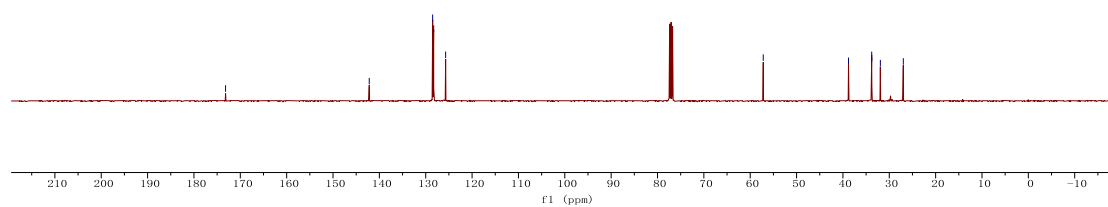

7.29 7.29 7.29 7.28 7.27 7.25 7.22 7.20 7.20 7.19 7.18 7.17 7.15 5.81 — 3.31 2.67 2.65 2.63 1.92 1.90 1.88 1.86 1.85

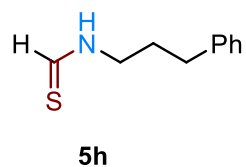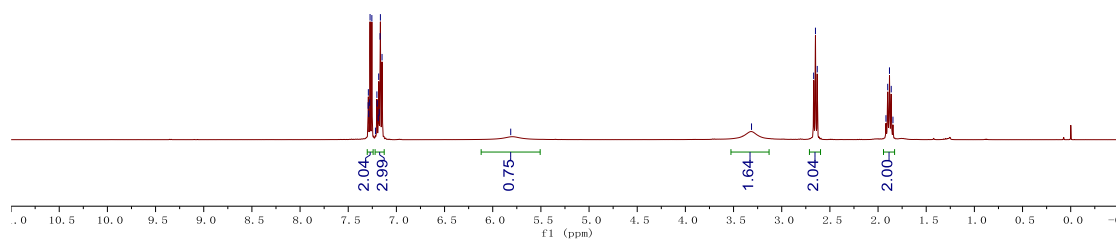

# SUPPORTING INFORMATION

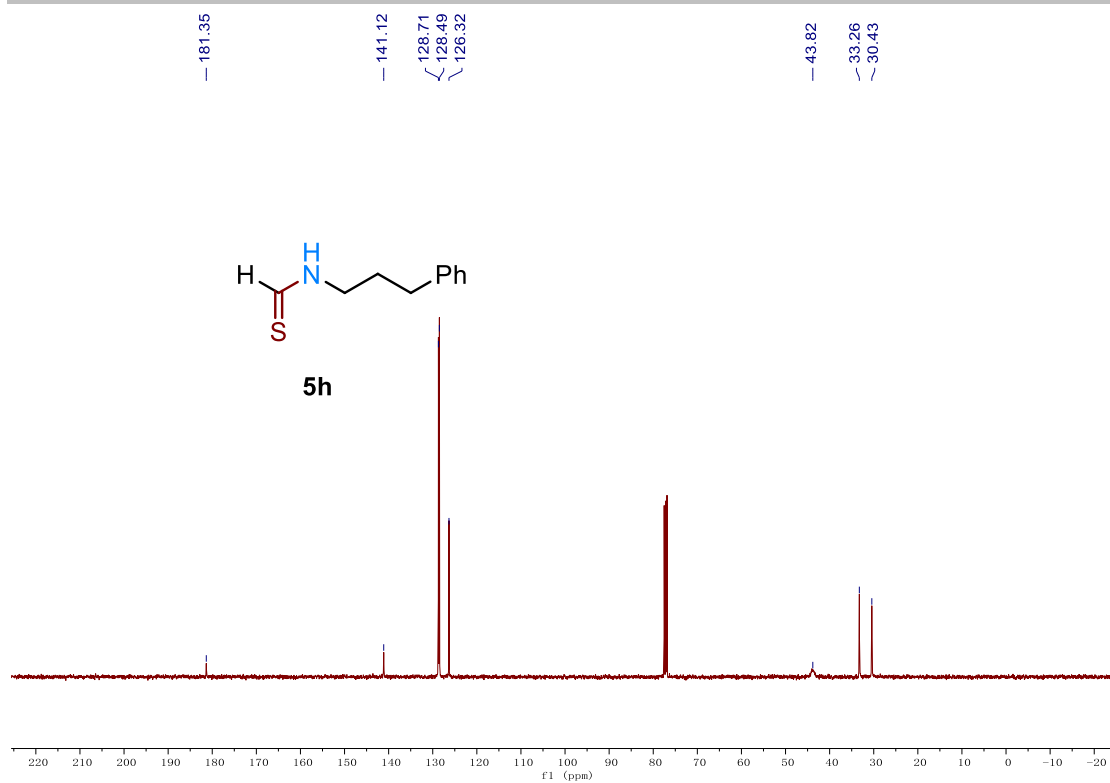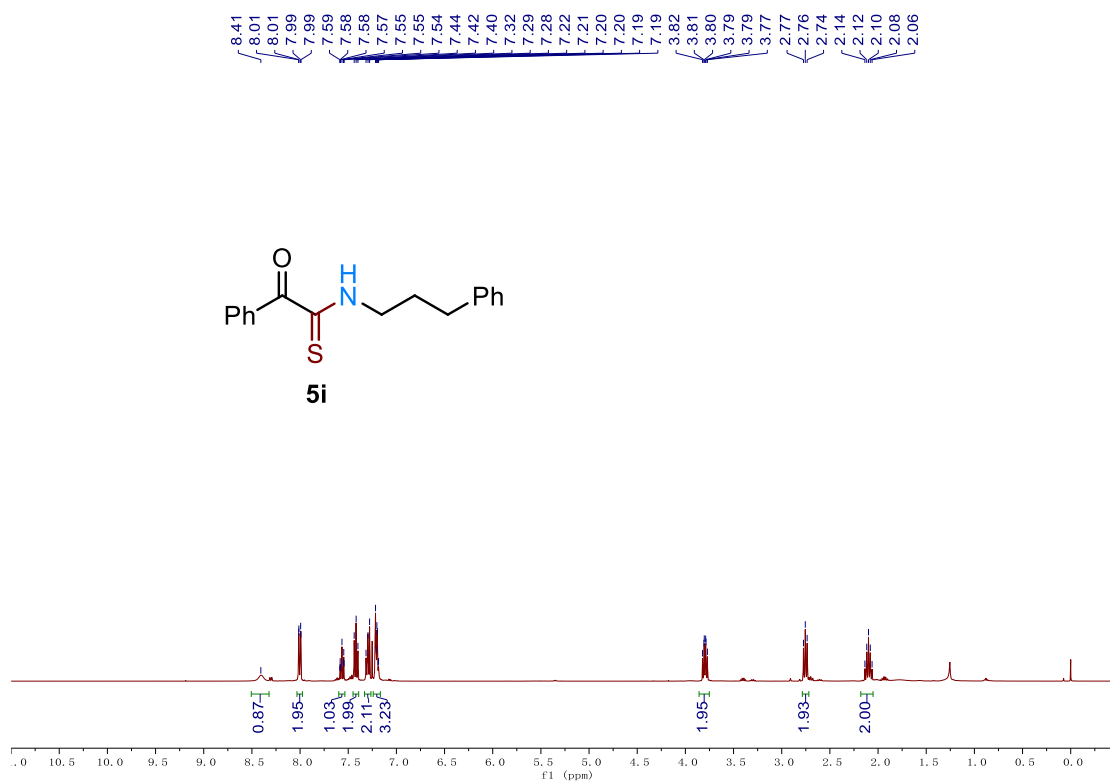

# SUPPORTING INFORMATION

— 193.81  
— 188.01

140.78  
133.99  
133.79  
130.82  
128.74  
128.49  
128.29  
126.42

— 44.88

— 33.35  
— 29.34

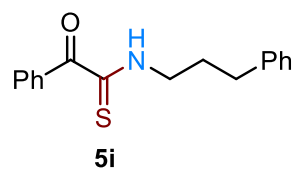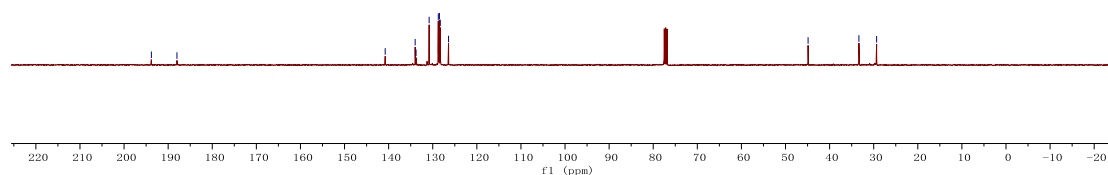

7.39  
7.39  
7.38  
7.38  
7.37  
7.37  
7.36  
7.36  
7.35  
7.35  
7.35  
7.33  
7.32  
7.32  
7.30  
7.30  
7.29  
7.29  
7.28  
7.28  
7.27  
7.27  
7.26  
7.26  
7.26  
7.25  
7.24  
7.24  
7.21  
7.21  
7.20  
7.20  
7.19  
7.19  
7.18  
7.17  
7.07  
7.06  
7.06  
7.05  
6.91  
4.06  
4.04  
4.02  
4.00  
3.64  
3.62  
3.62  
3.61  
3.60  
3.59  
2.54  
2.52  
2.51  
1.90  
1.88  
1.86  
1.84  
1.82  
1.68  
1.66

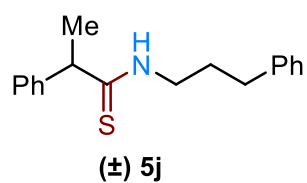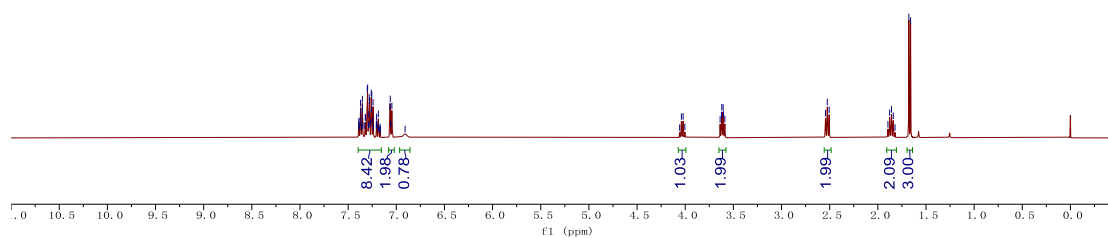

# SUPPORTING INFORMATION

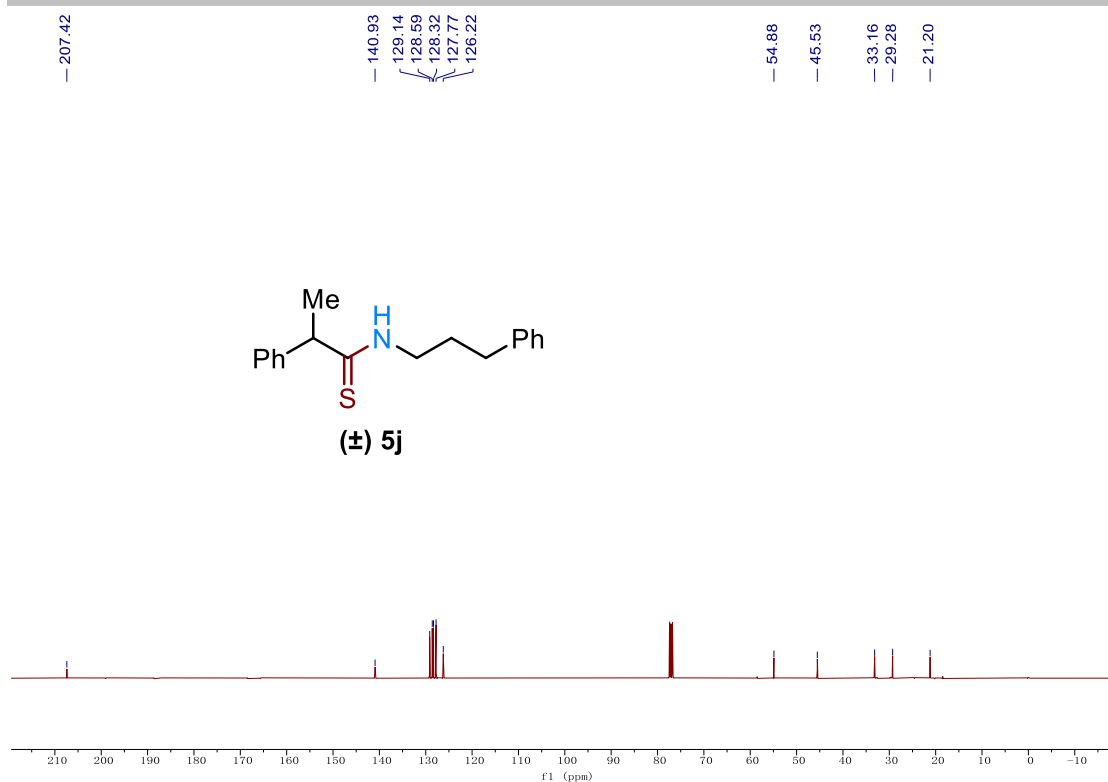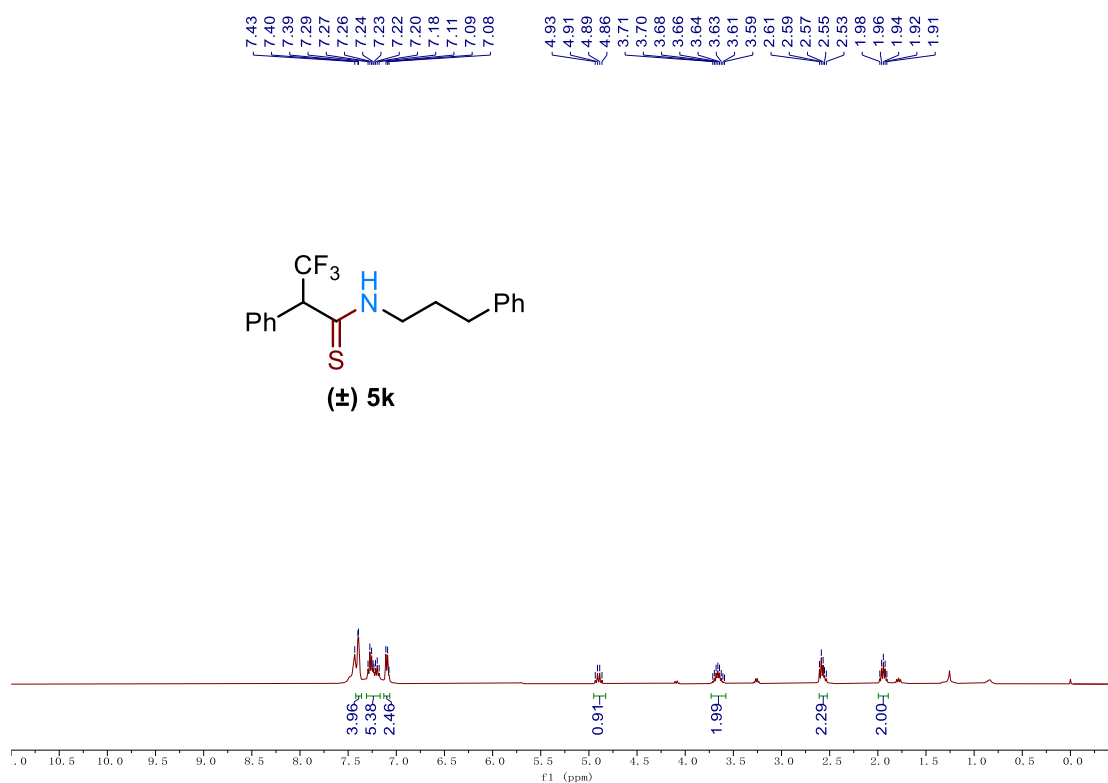



## SUPPORTING INFORMATION

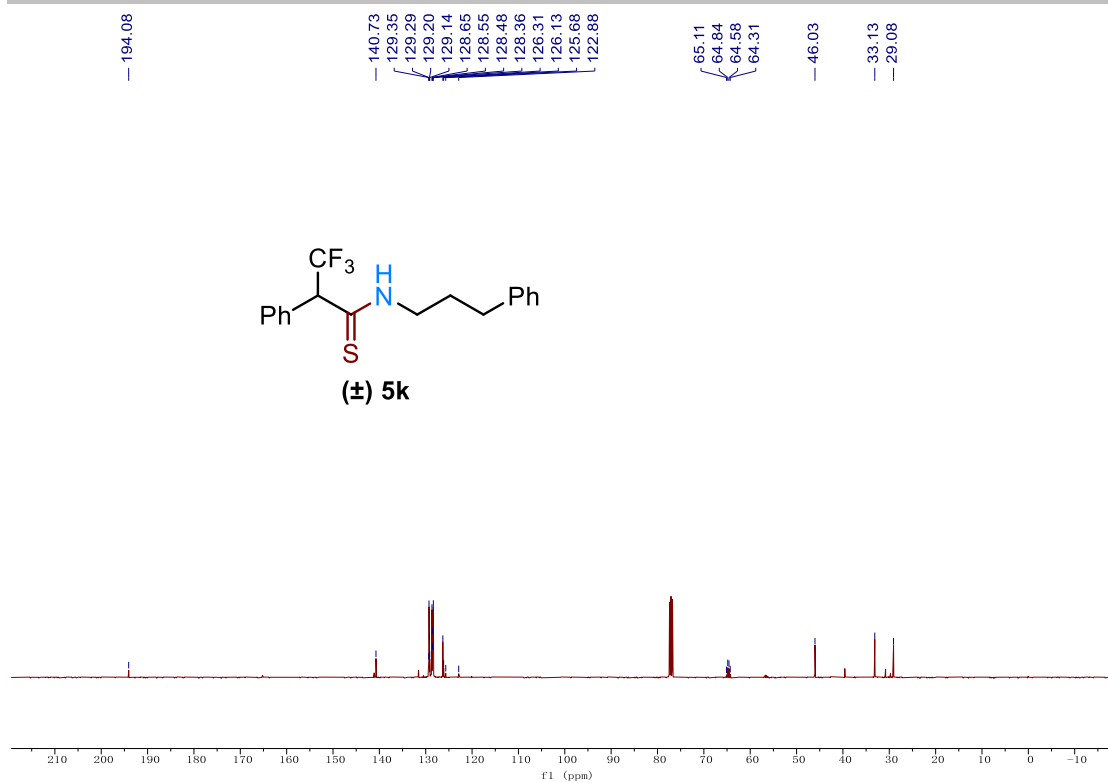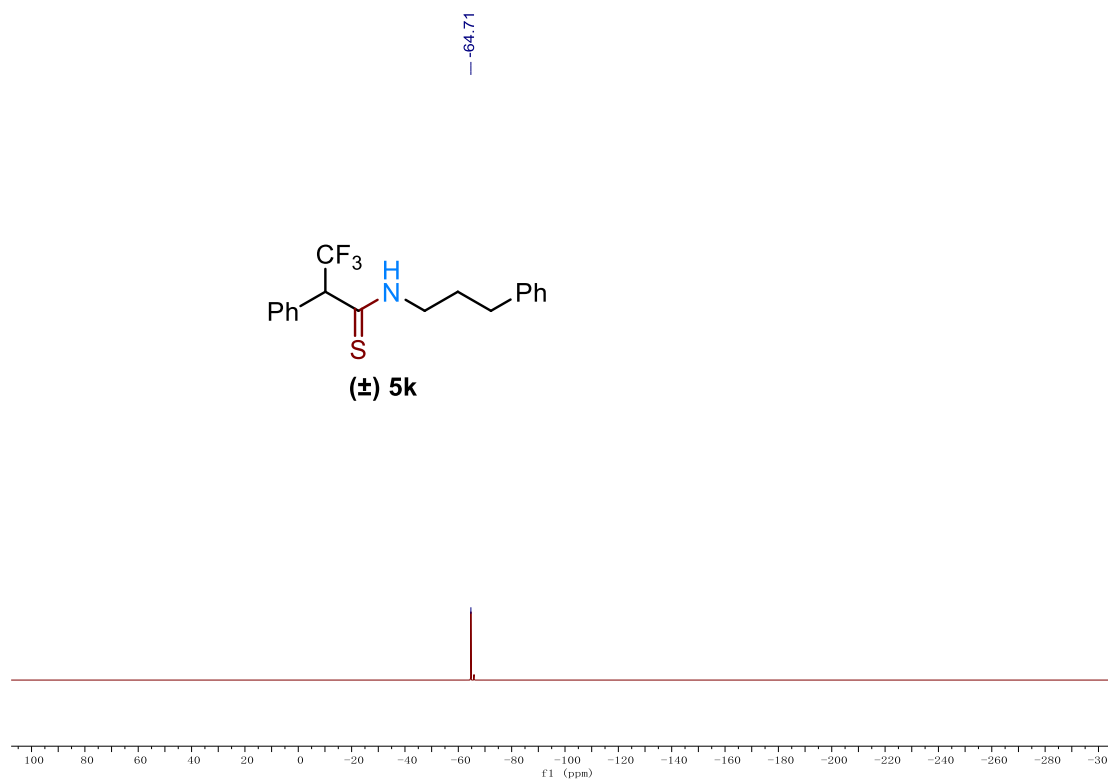

# SUPPORTING INFORMATION

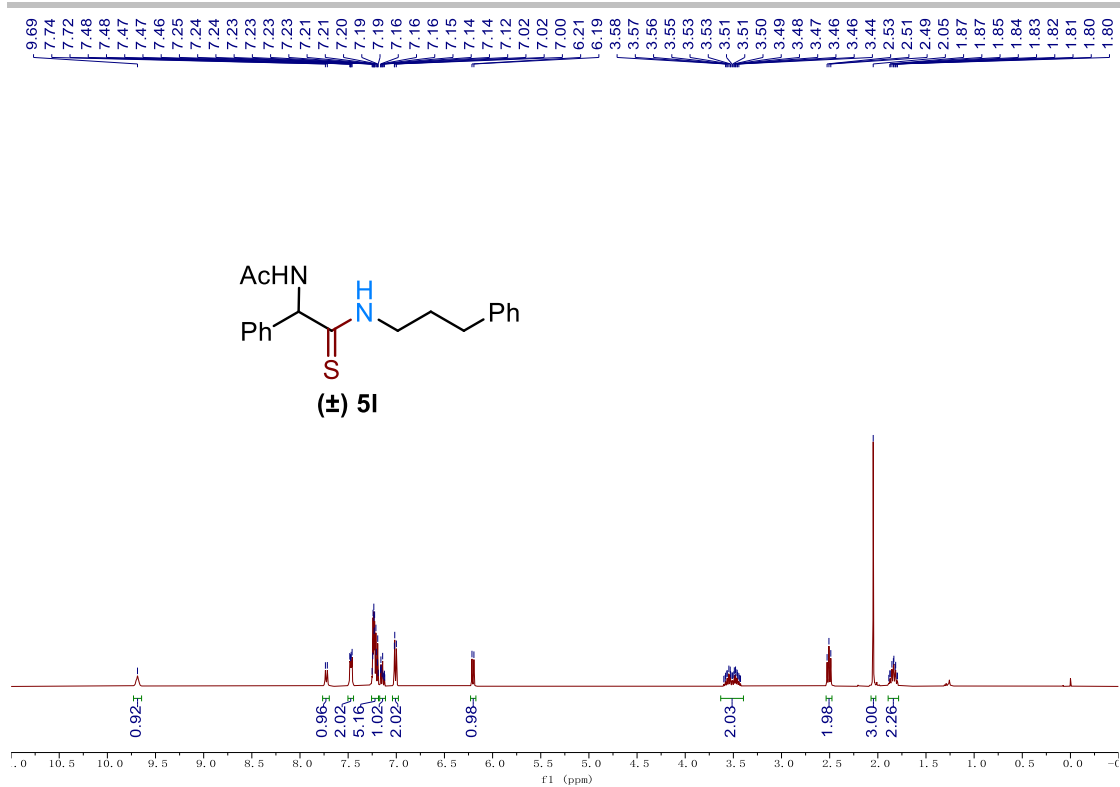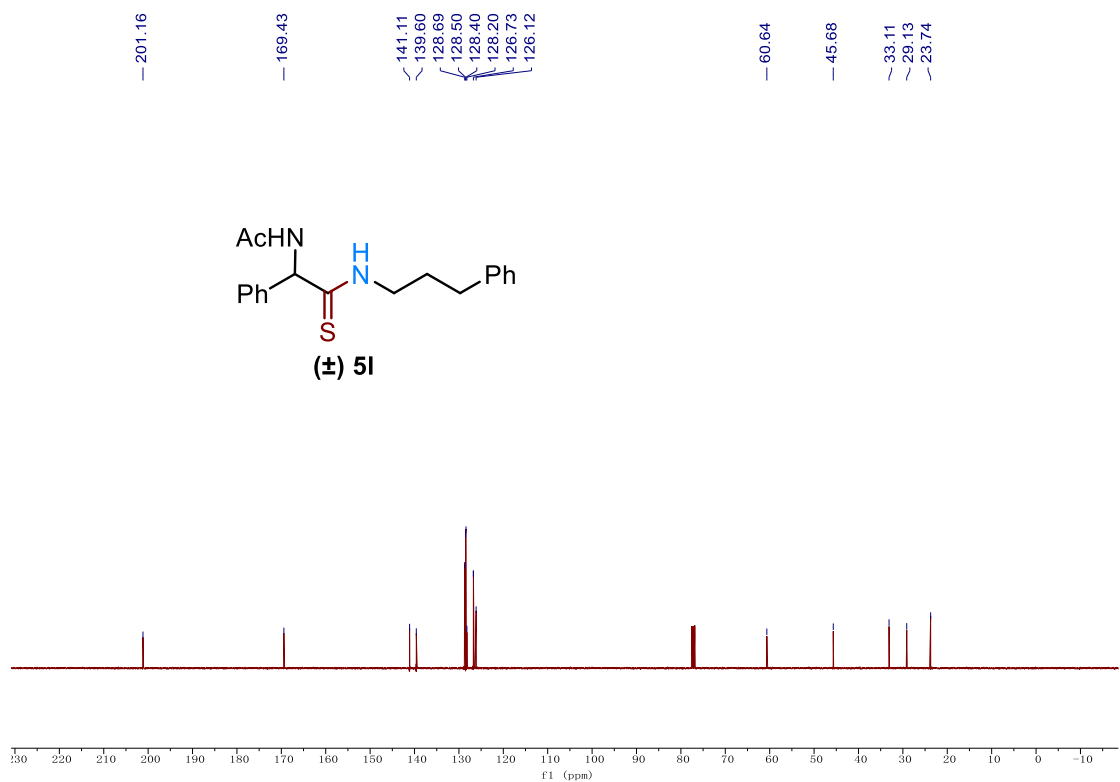

# SUPPORTING INFORMATION

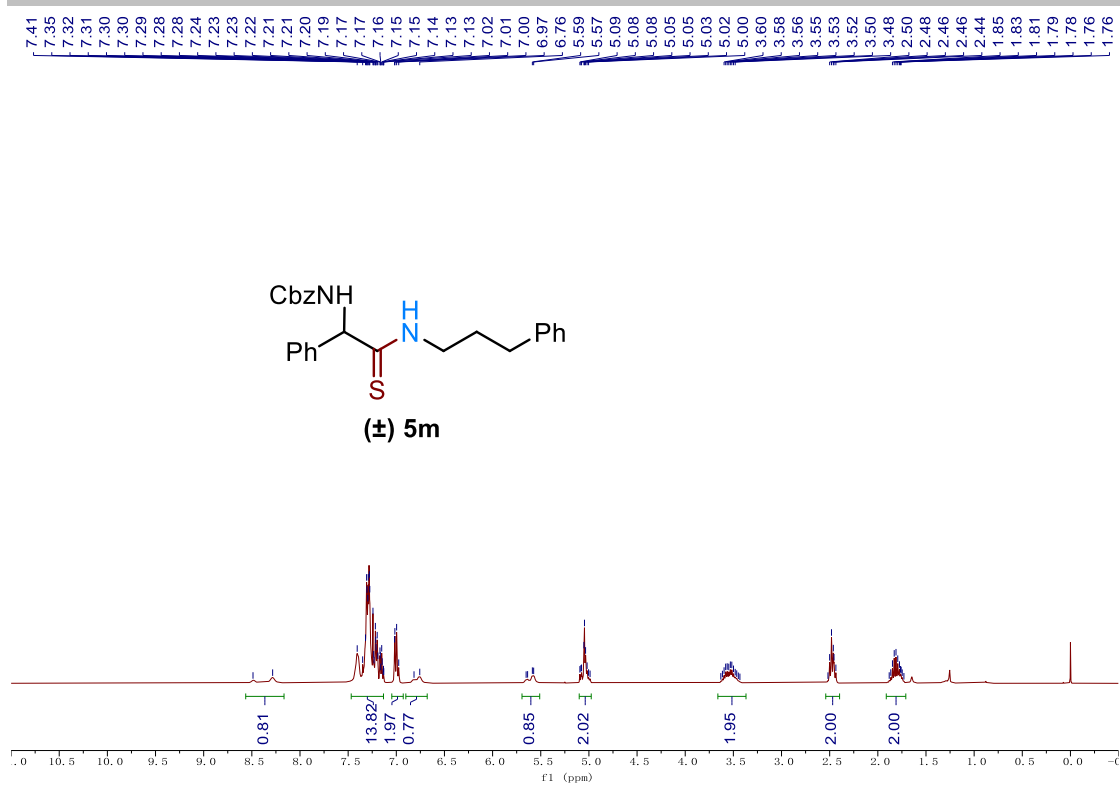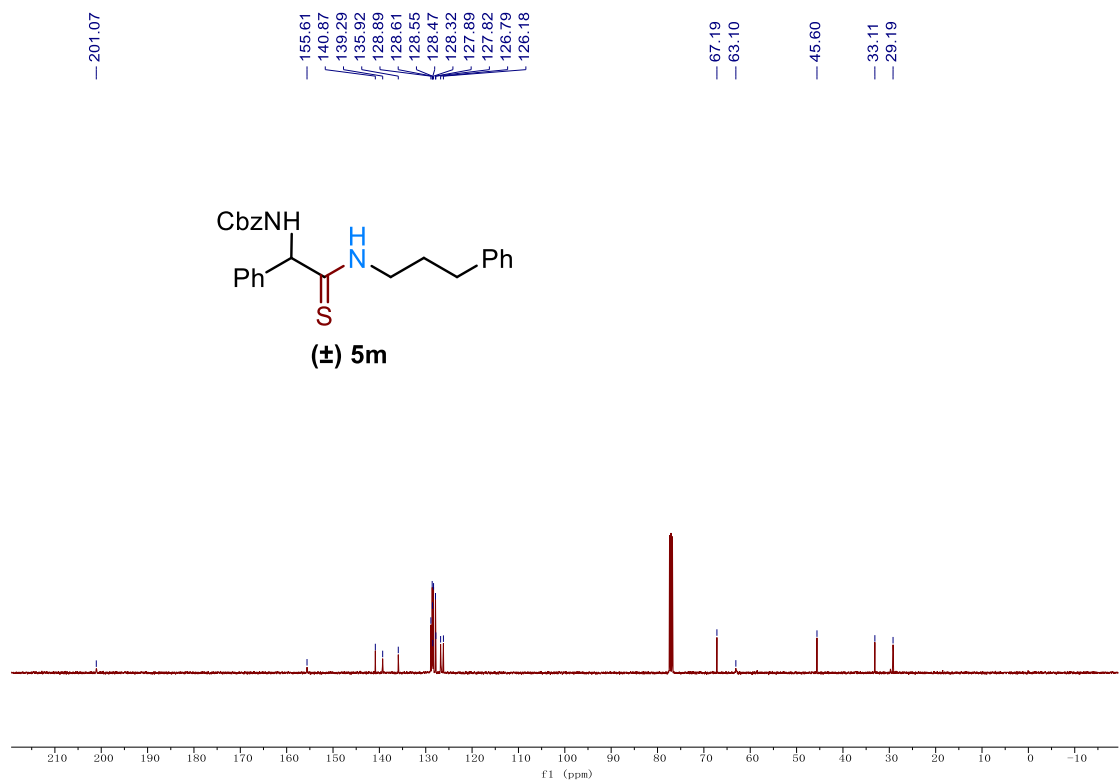

# SUPPORTING INFORMATION

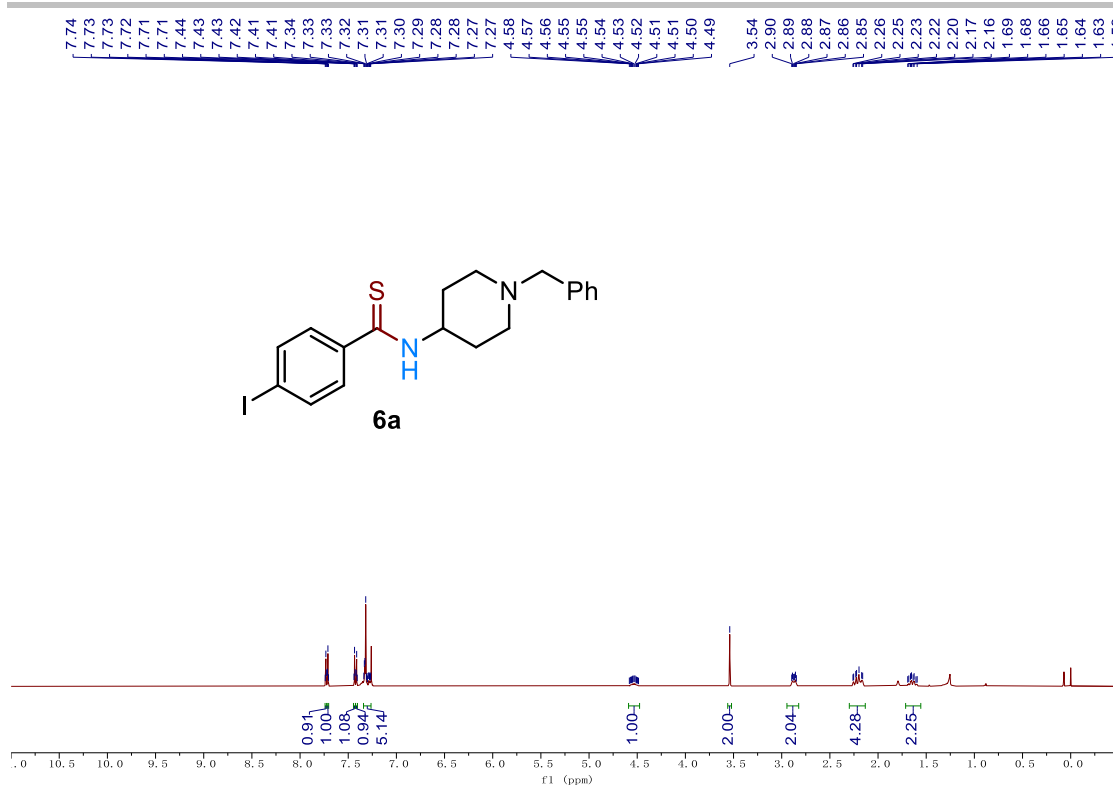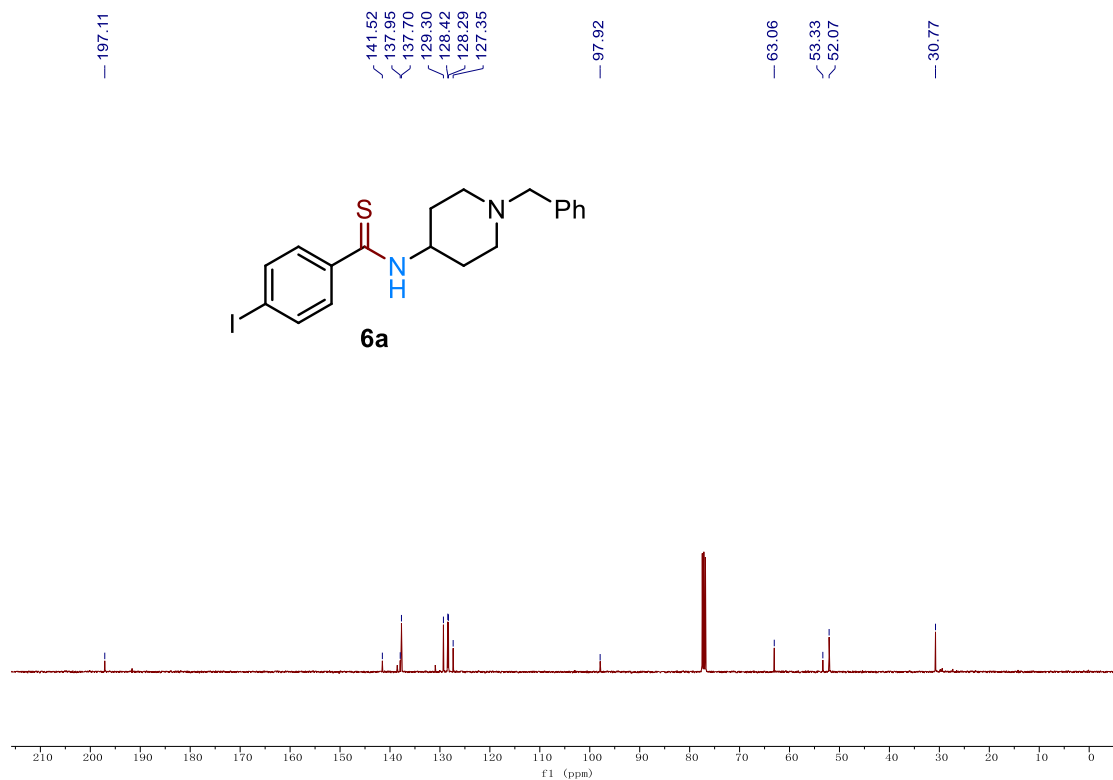

# SUPPORTING INFORMATION

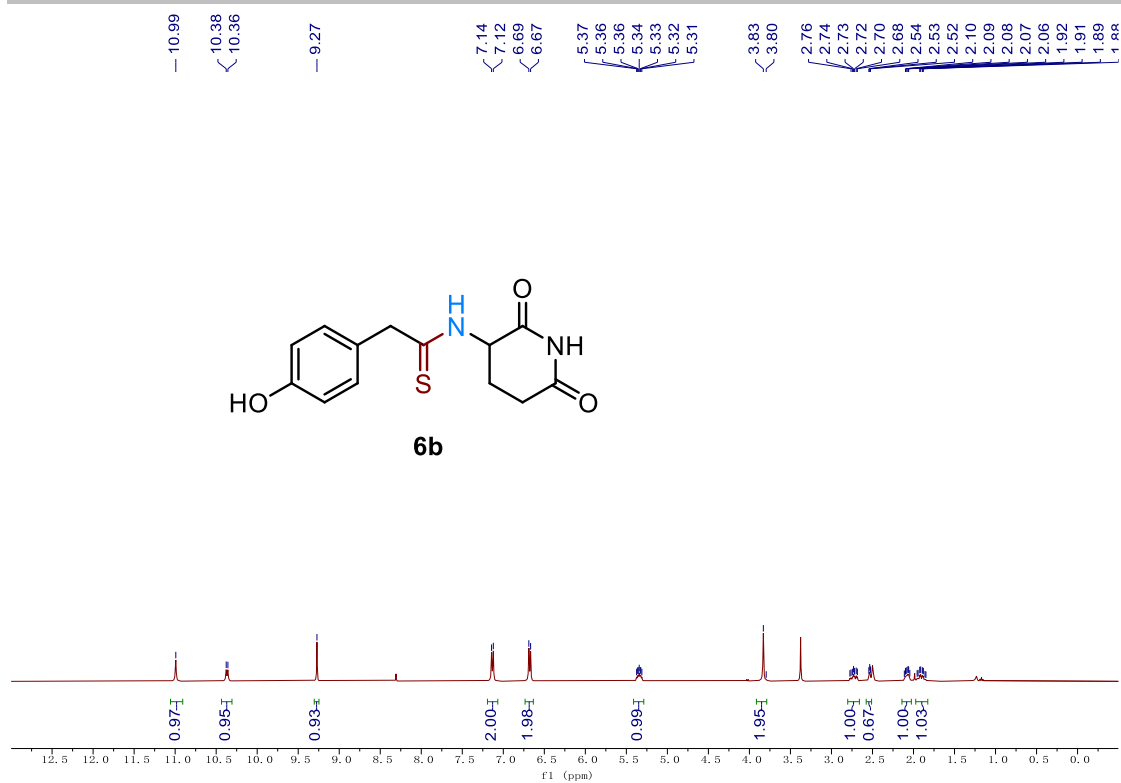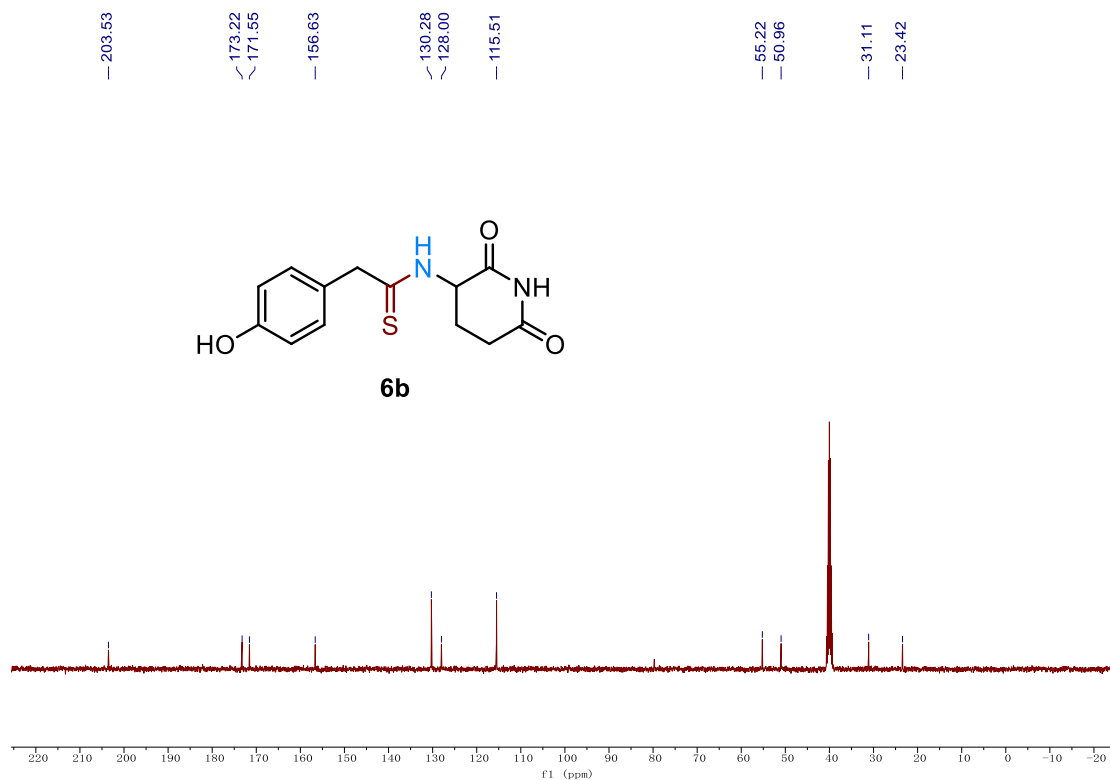

# SUPPORTING INFORMATION

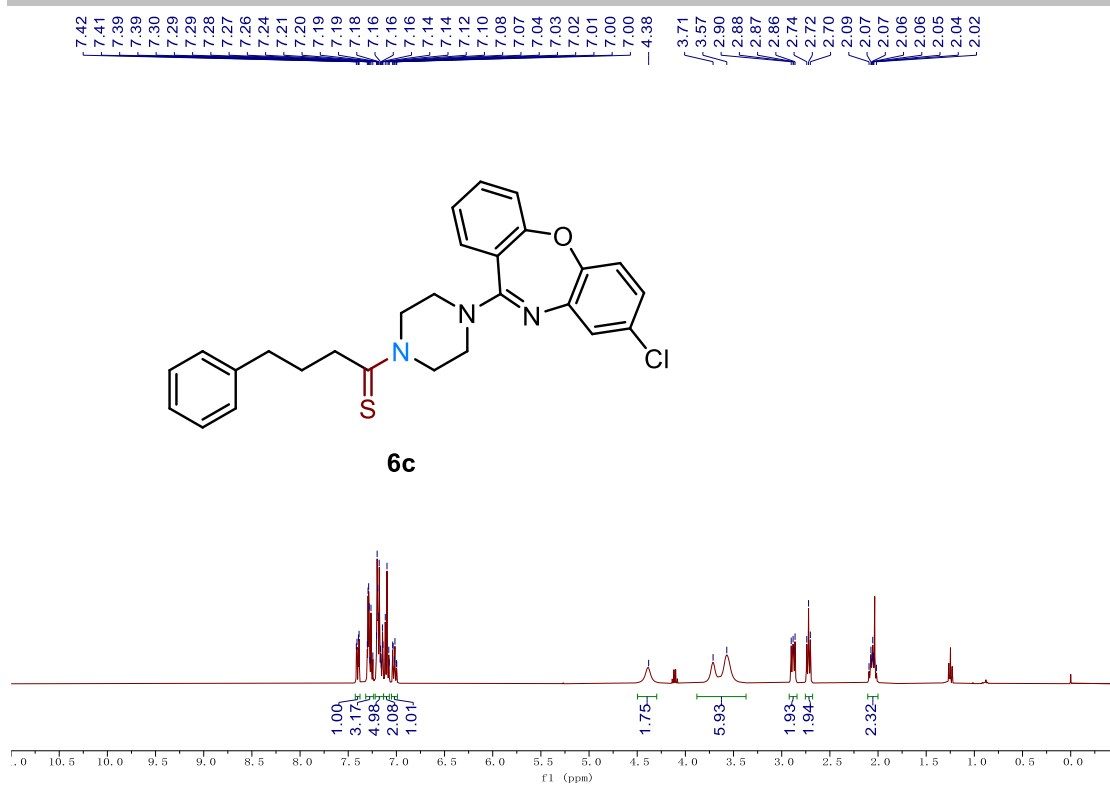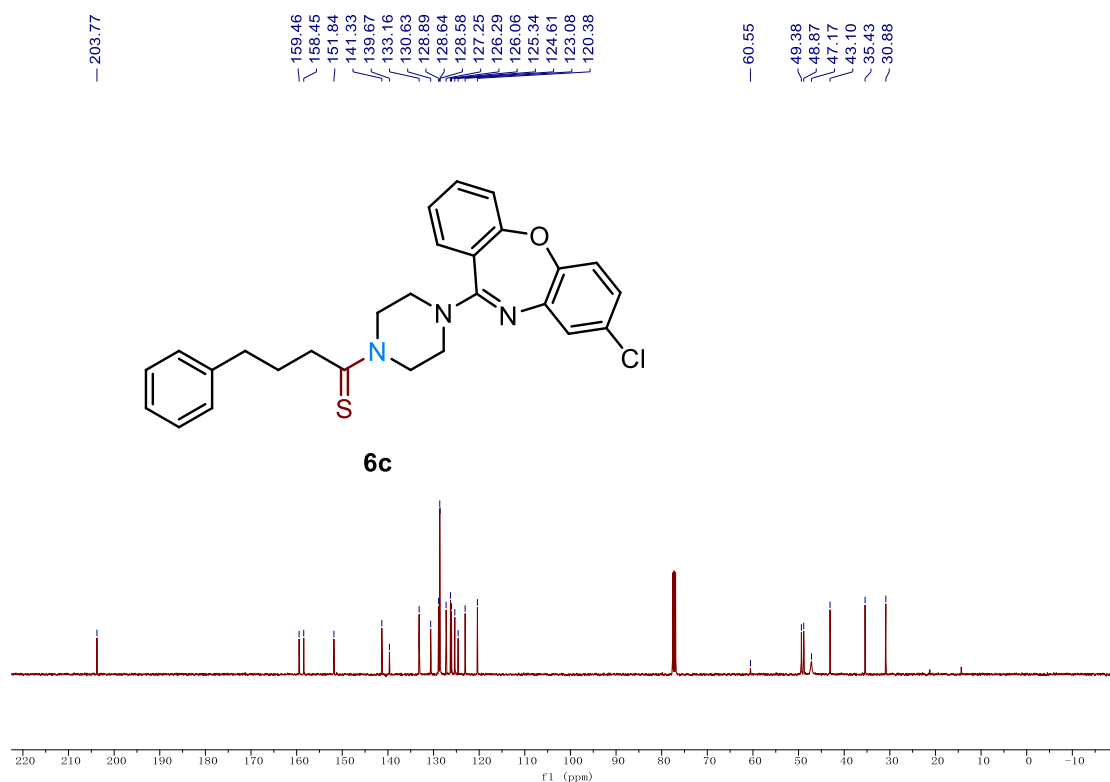

# SUPPORTING INFORMATION

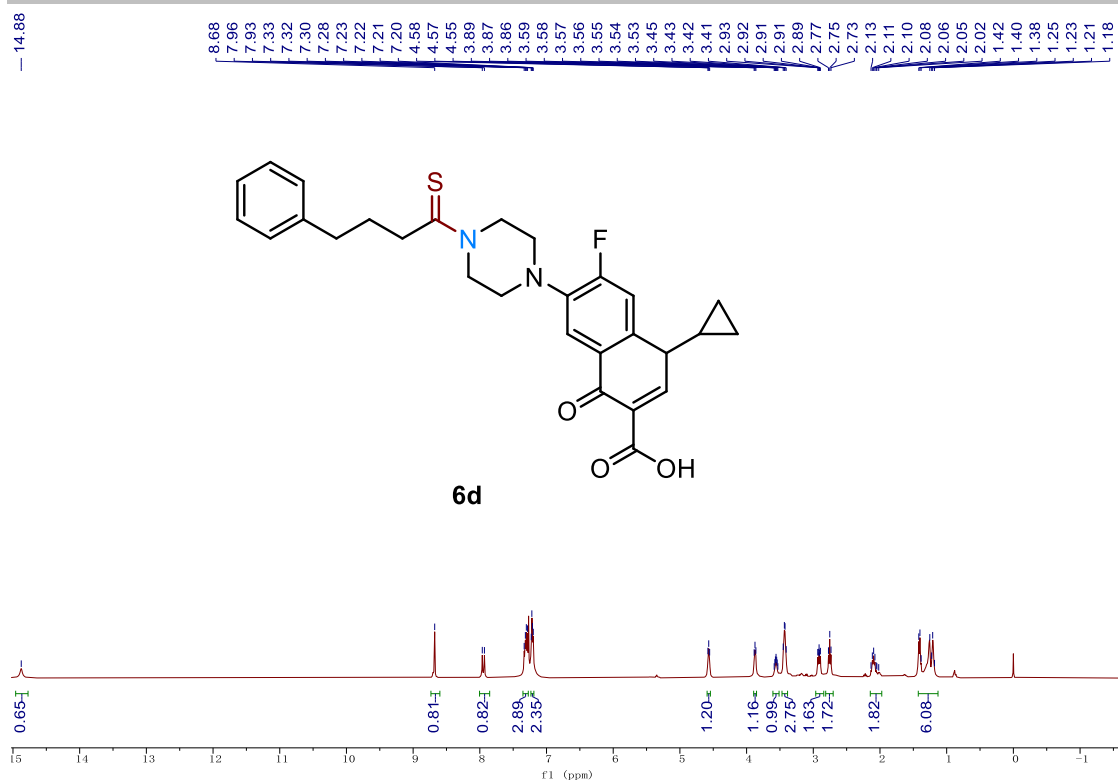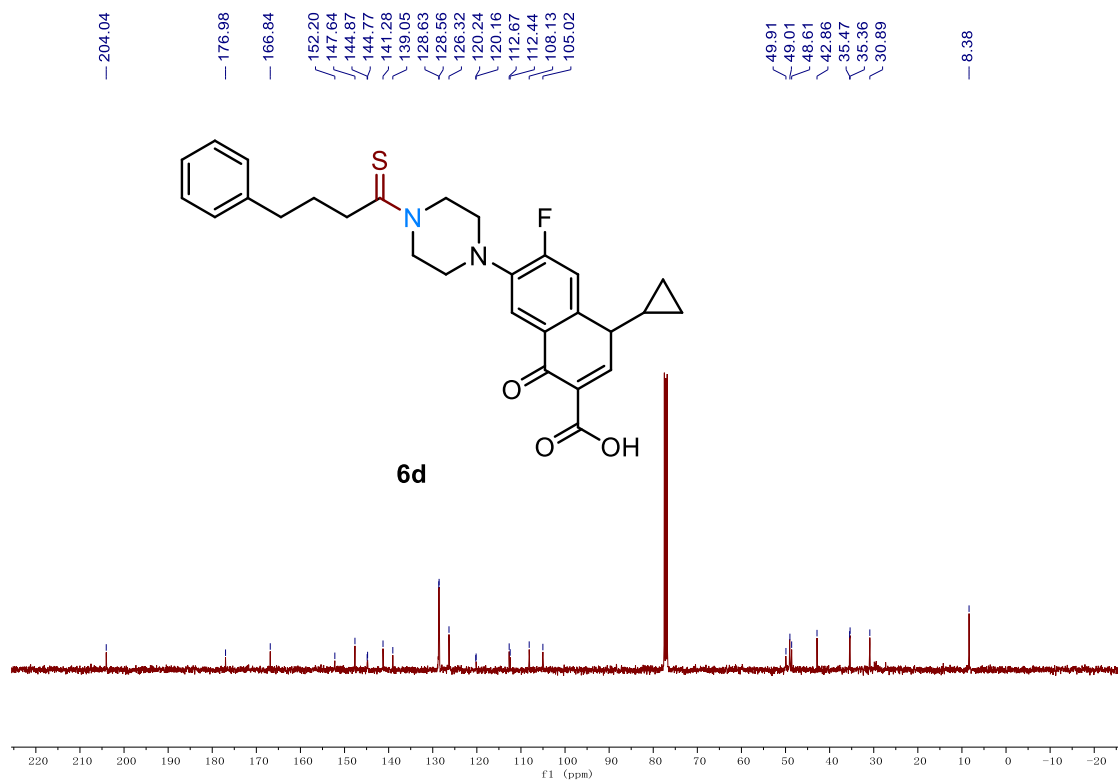

## SUPPORTING INFORMATION

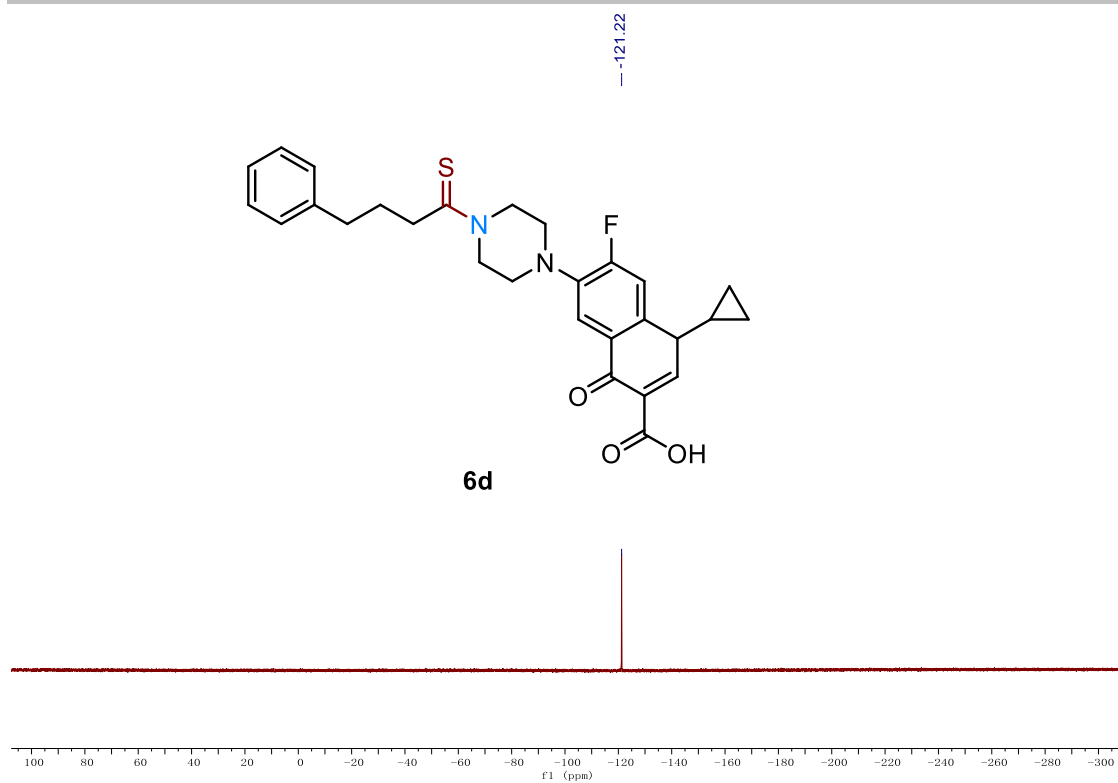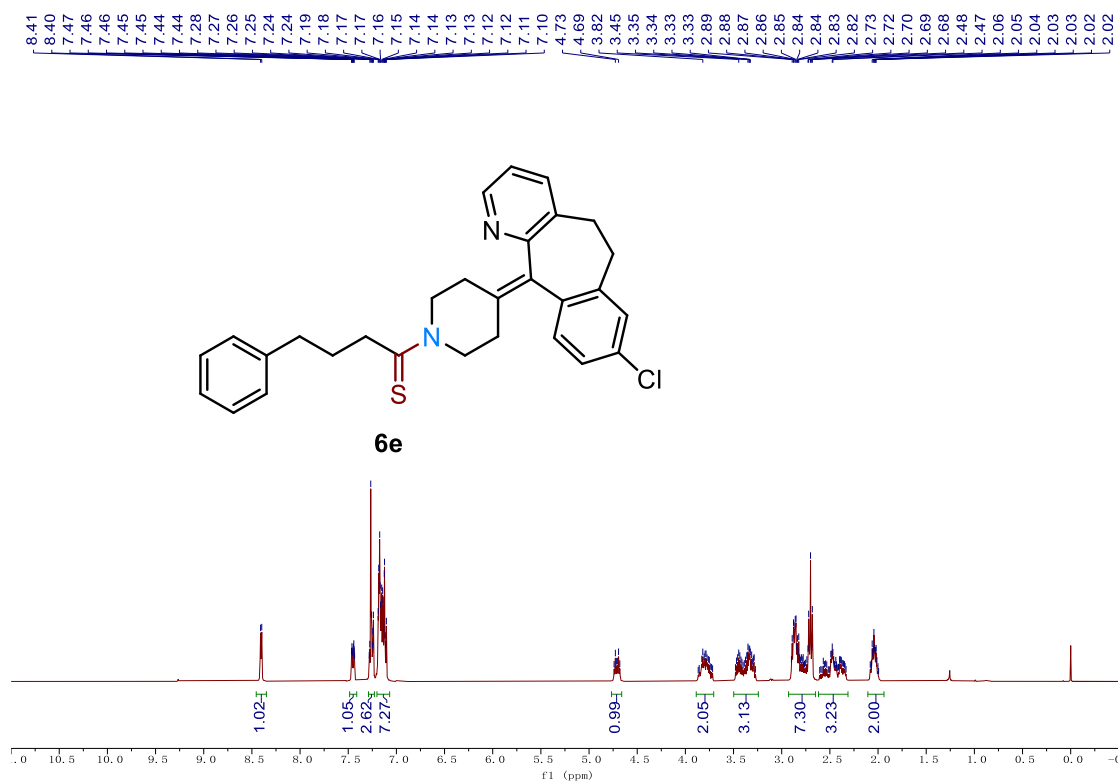



# SUPPORTING INFORMATION

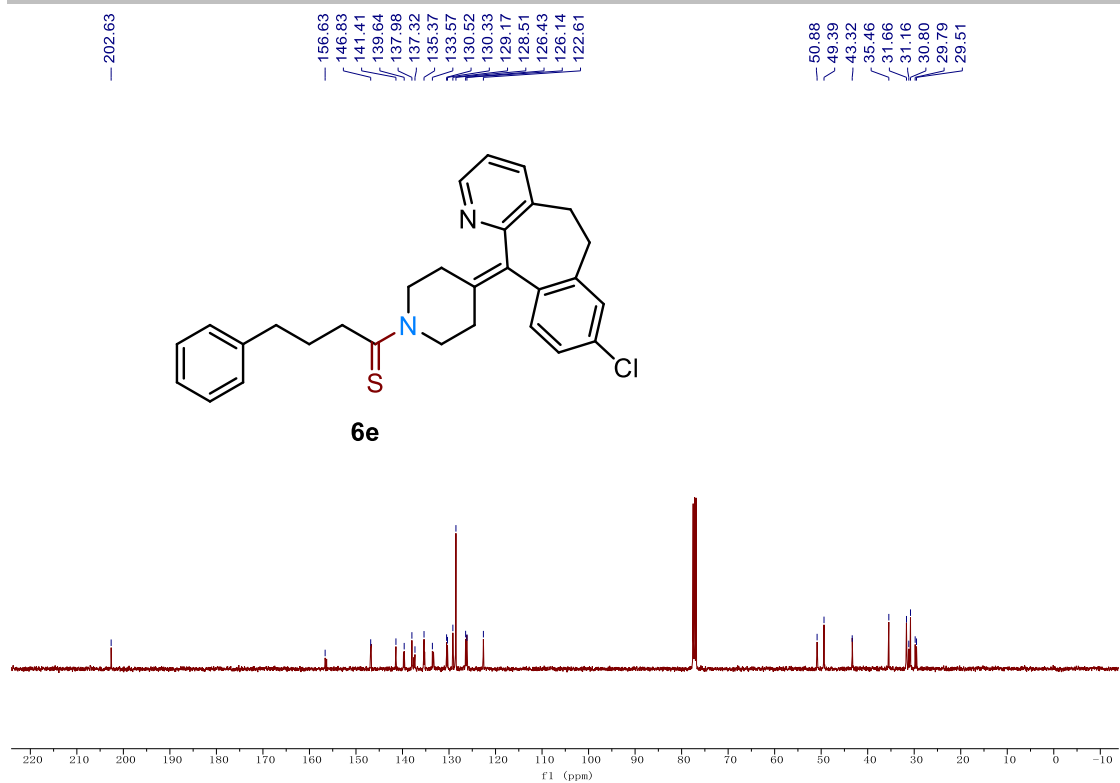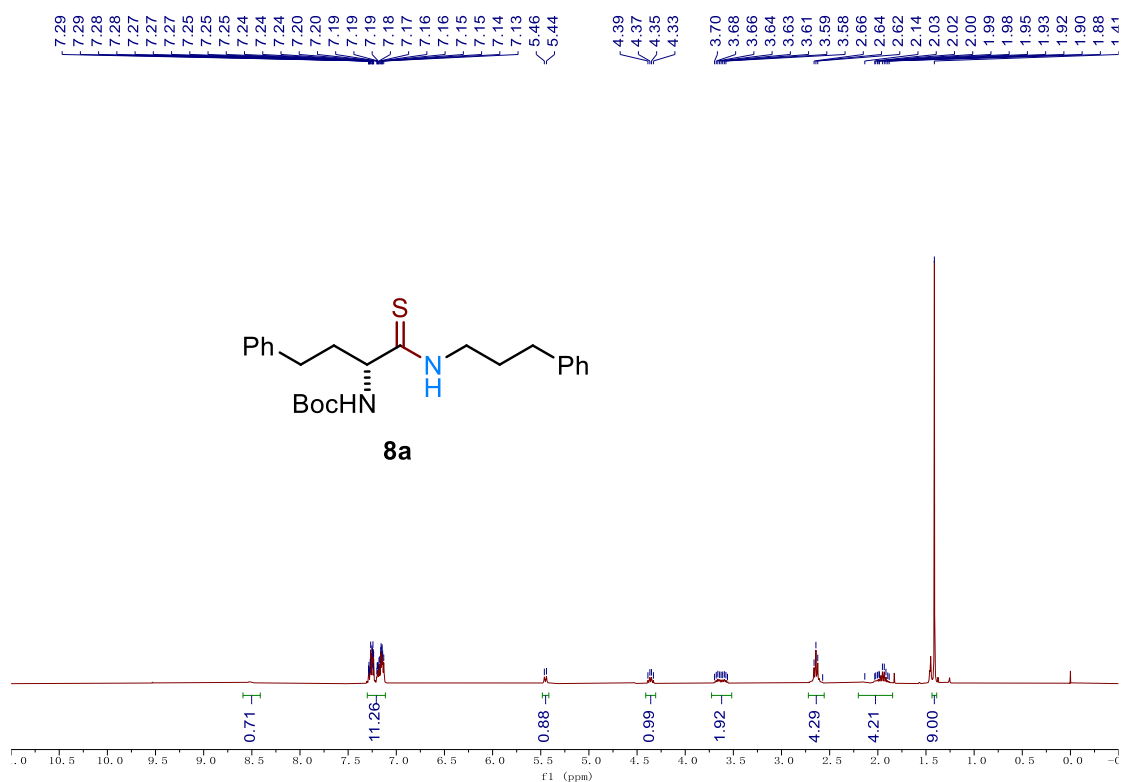

# SUPPORTING INFORMATION

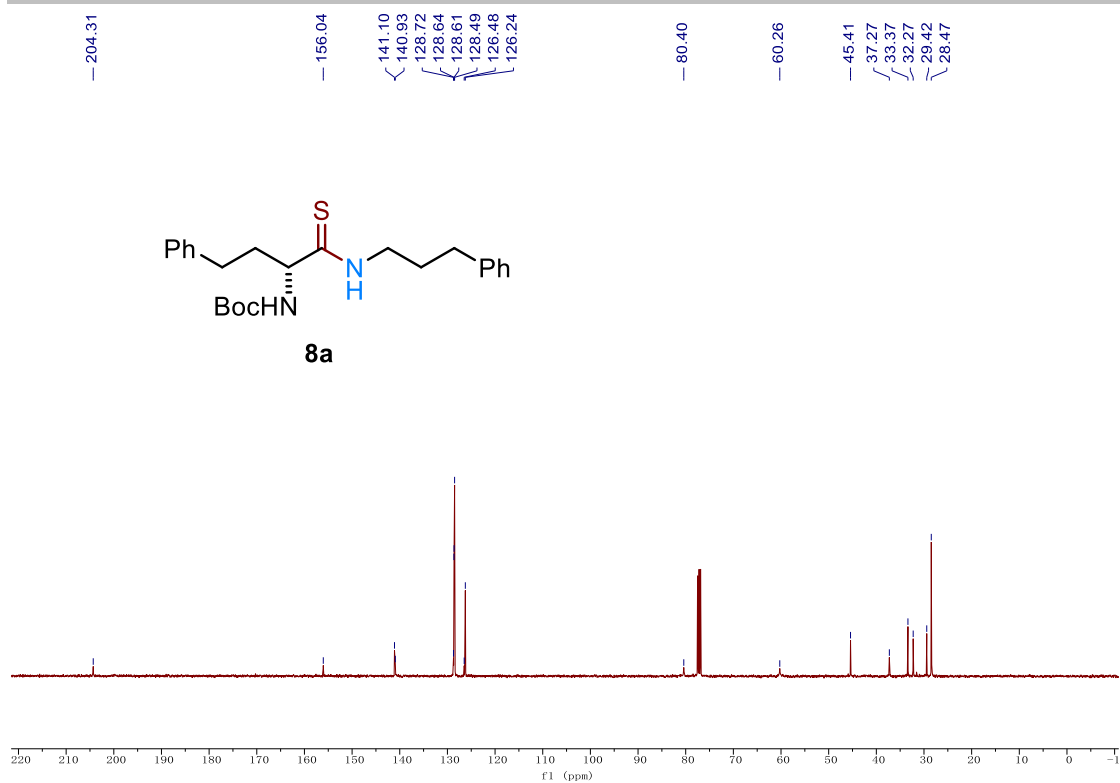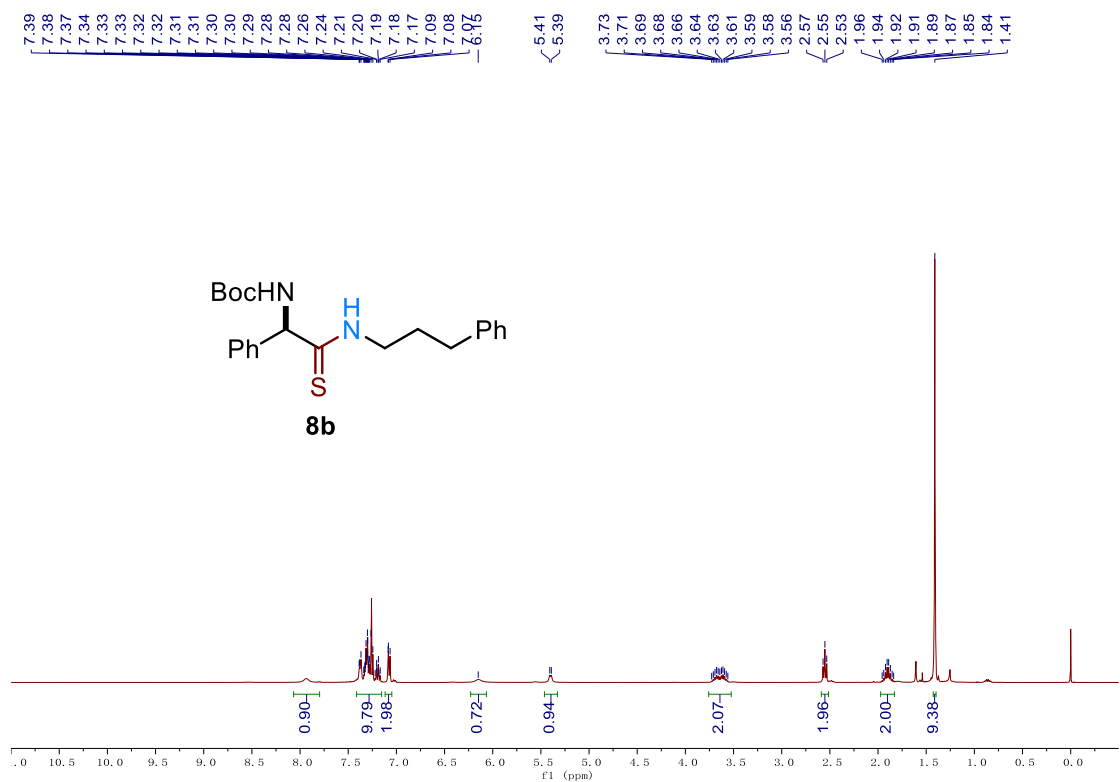

# SUPPORTING INFORMATION

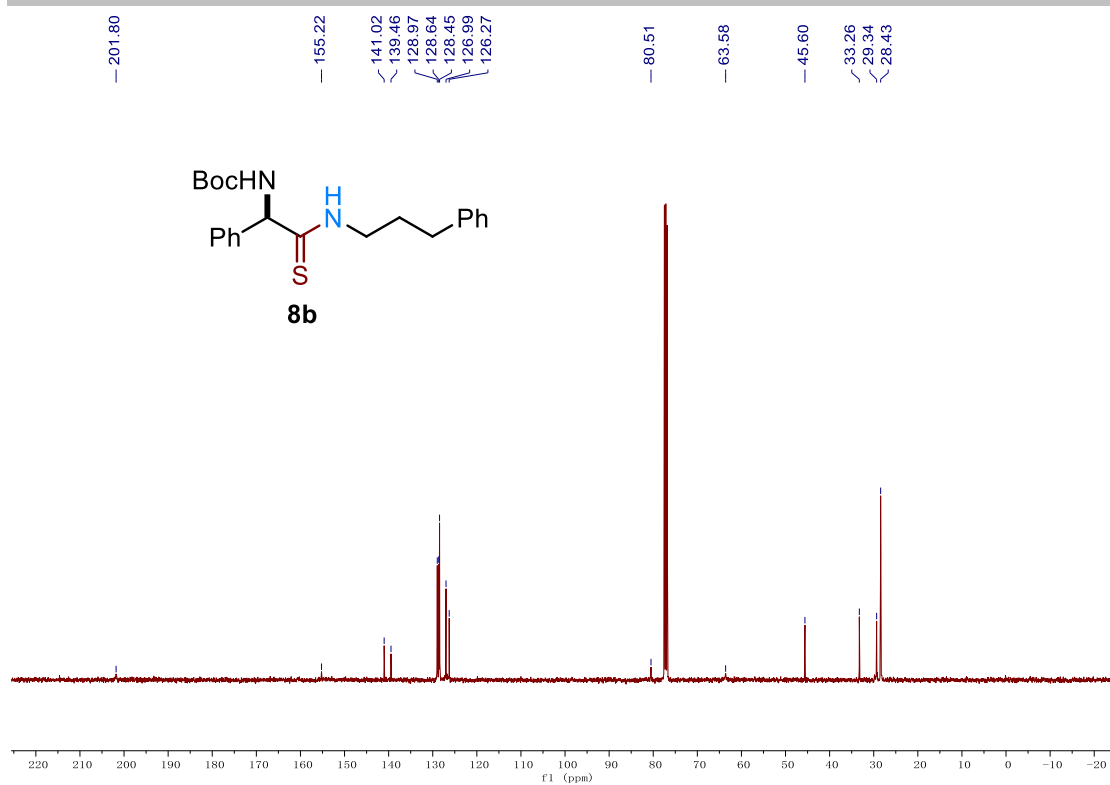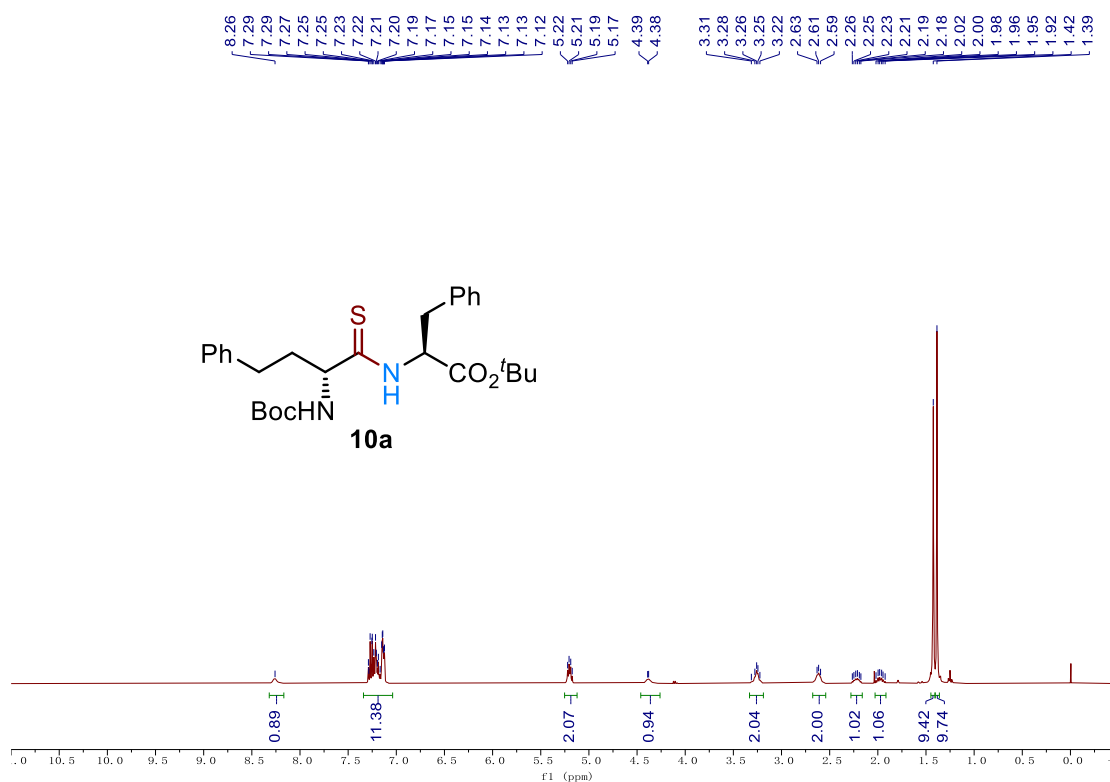

# SUPPORTING INFORMATION

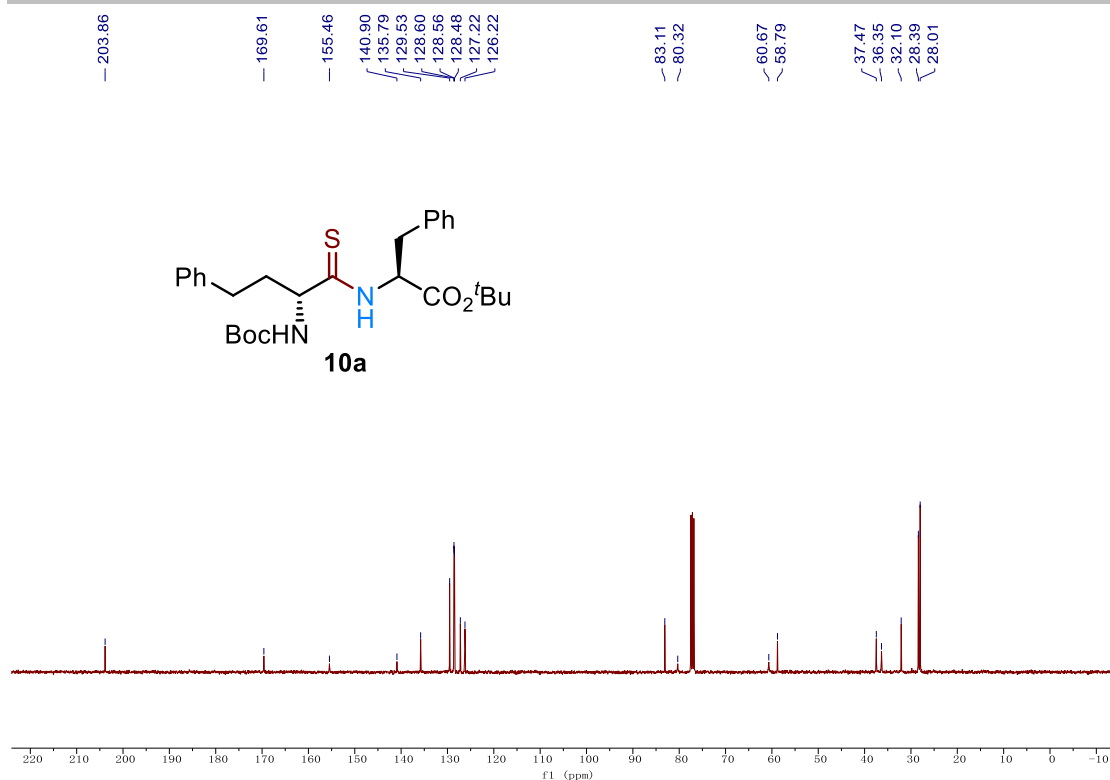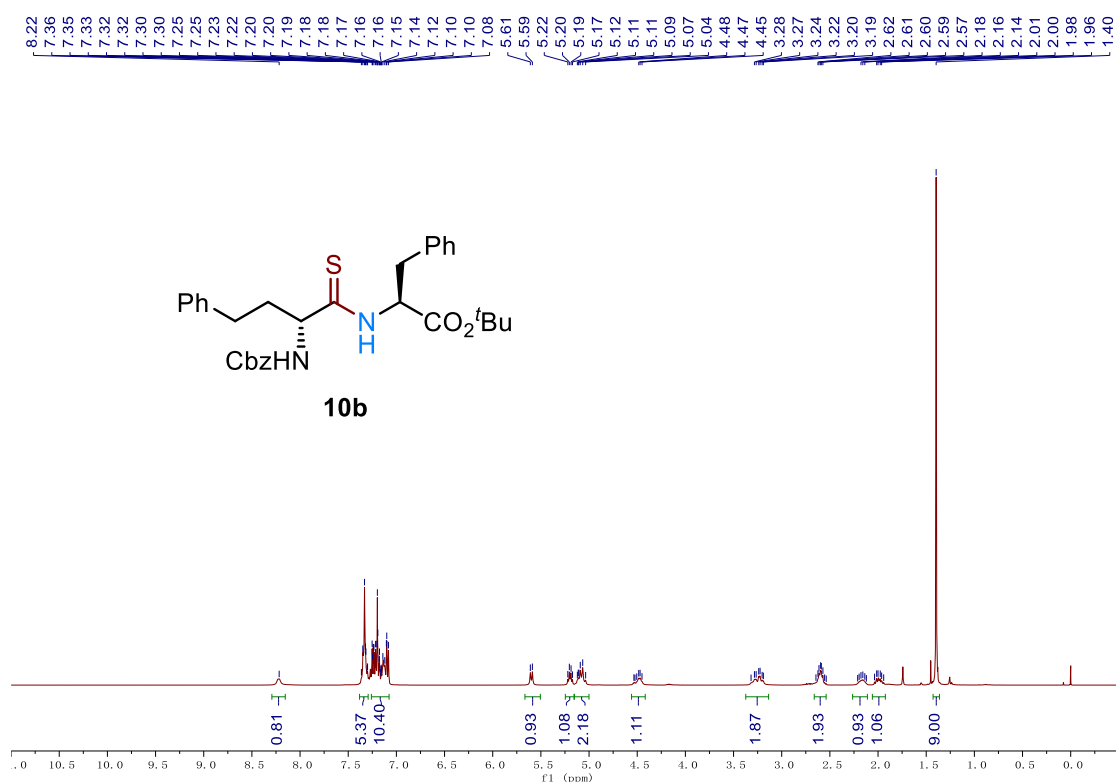

# SUPPORTING INFORMATION

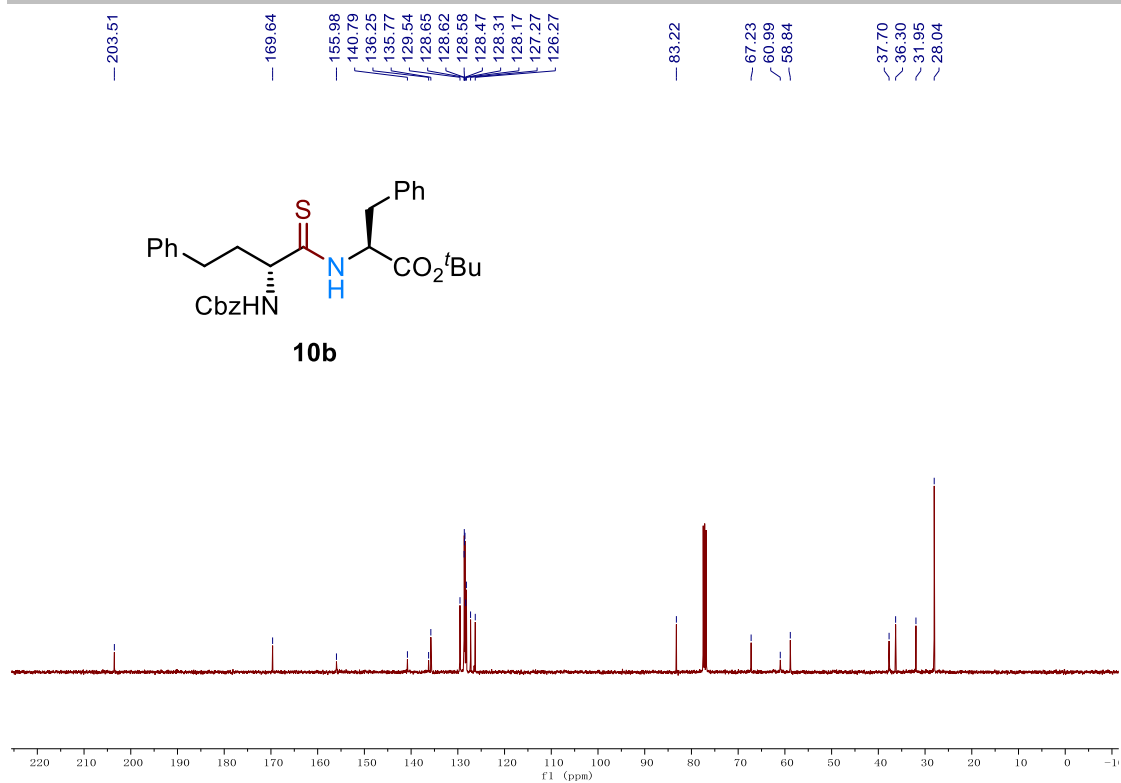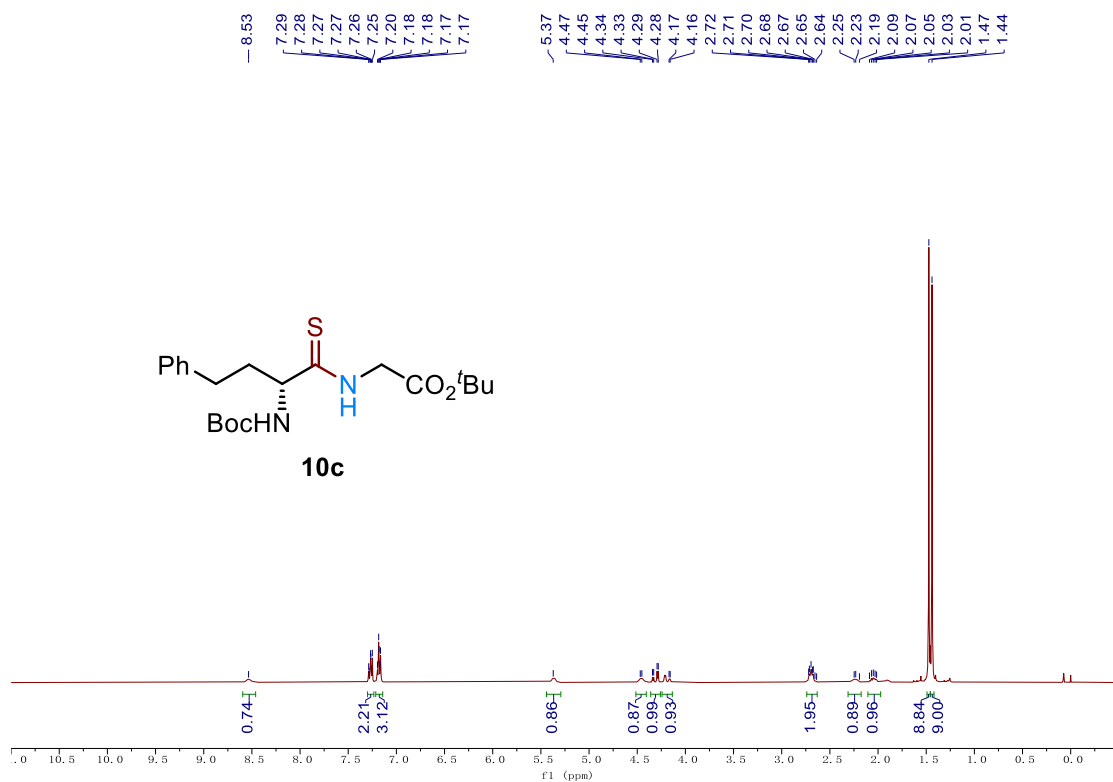

# SUPPORTING INFORMATION

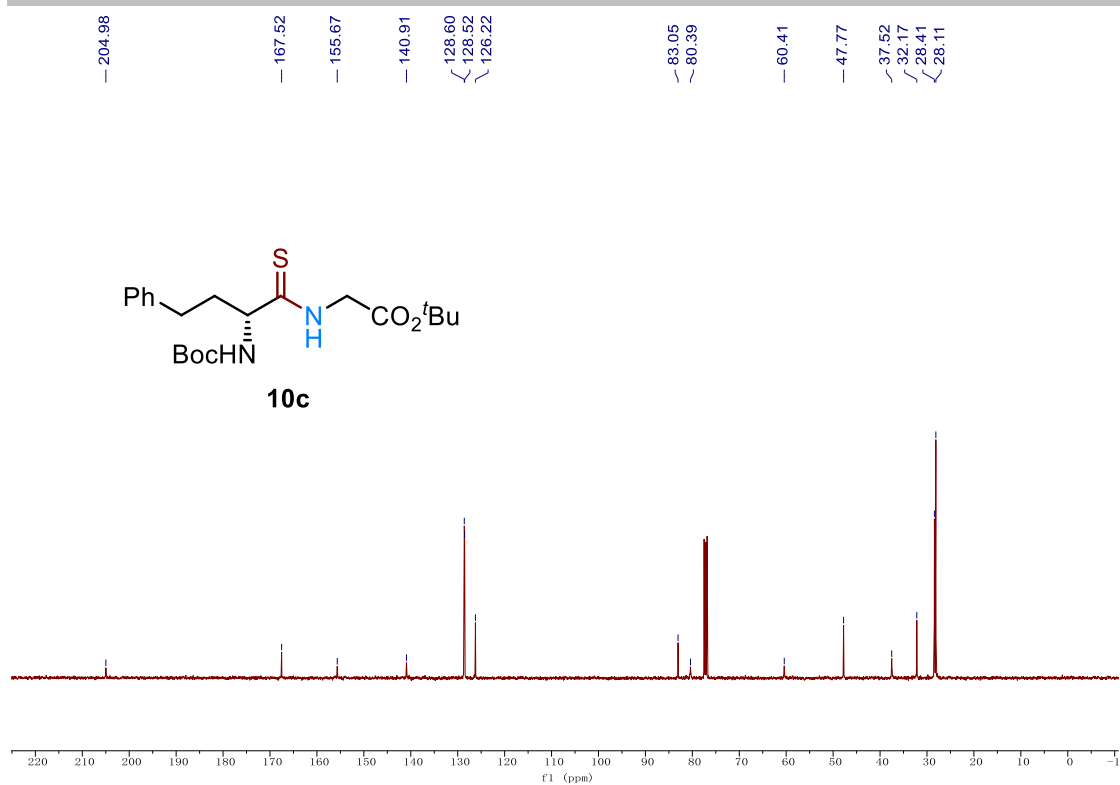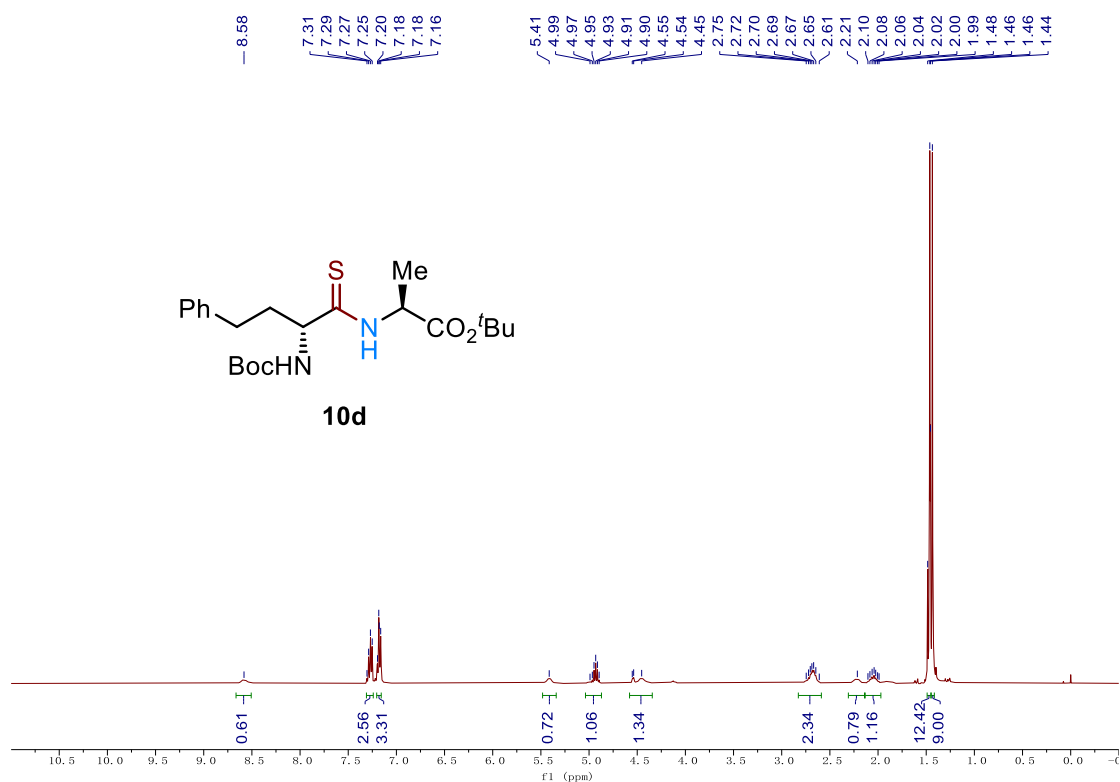

# SUPPORTING INFORMATION

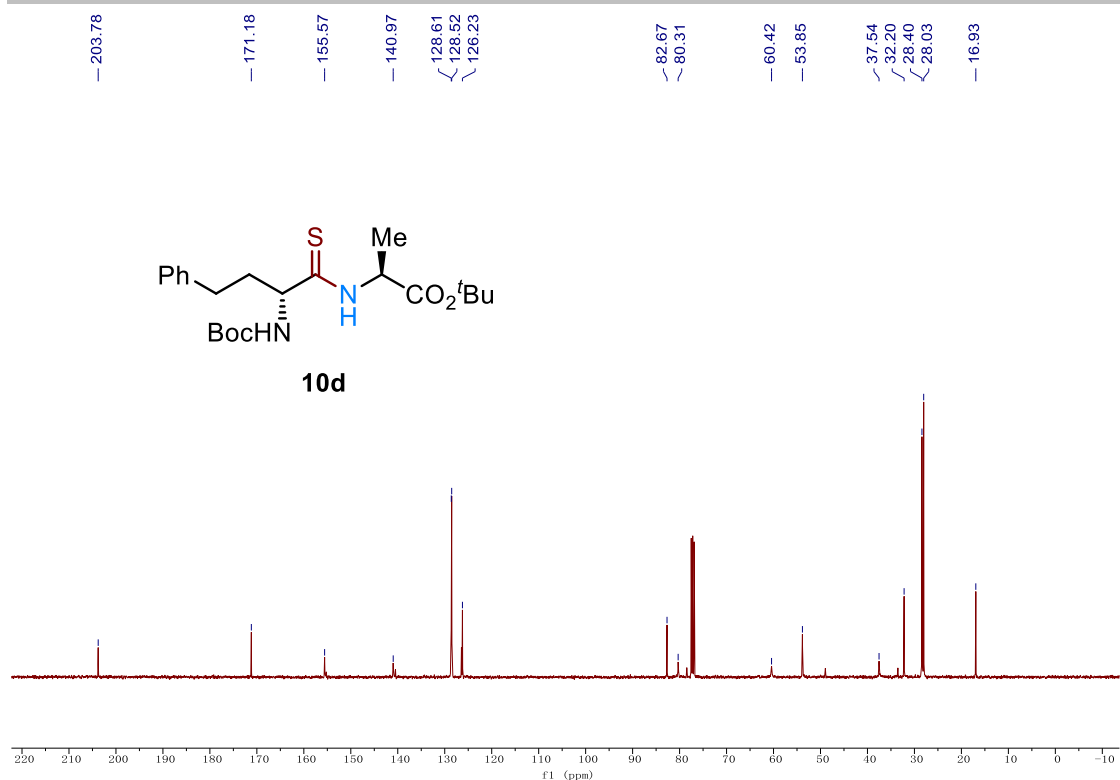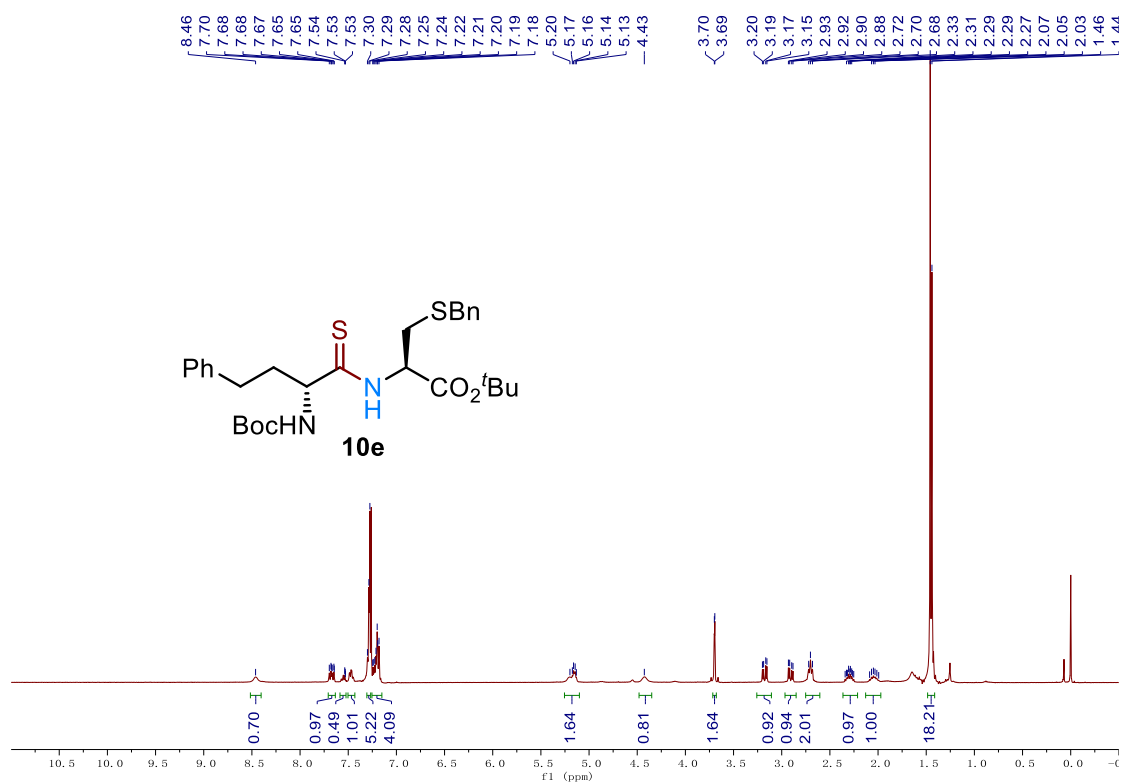

# SUPPORTING INFORMATION

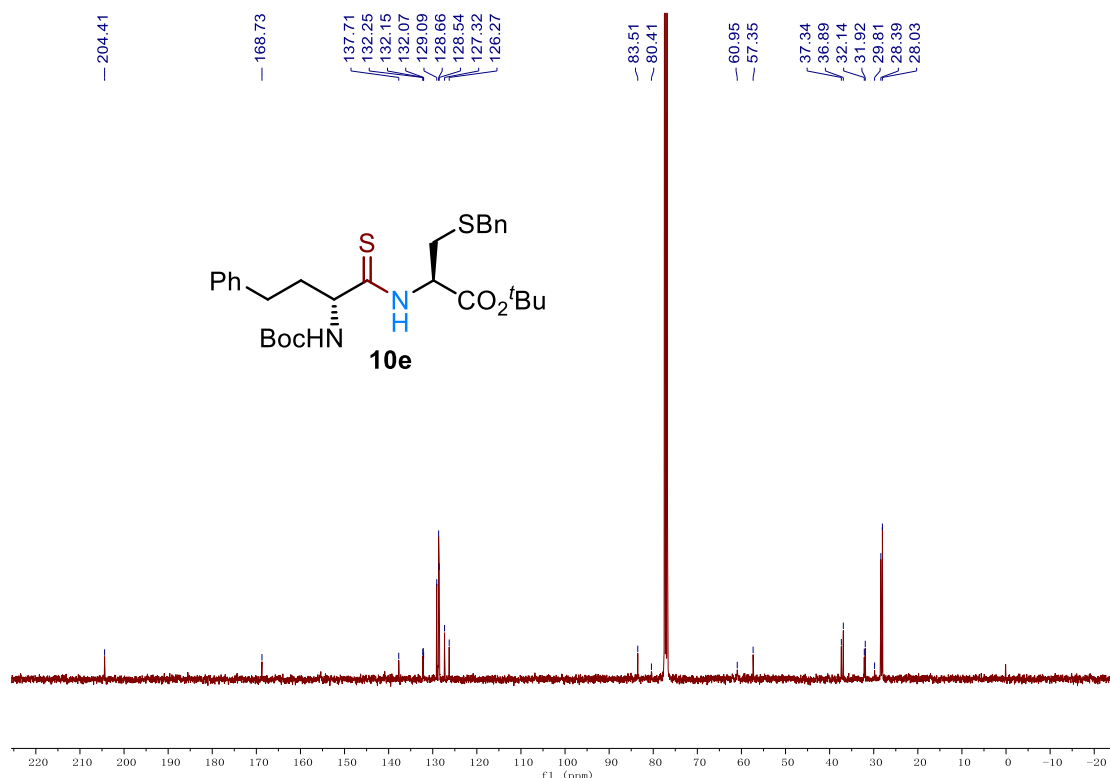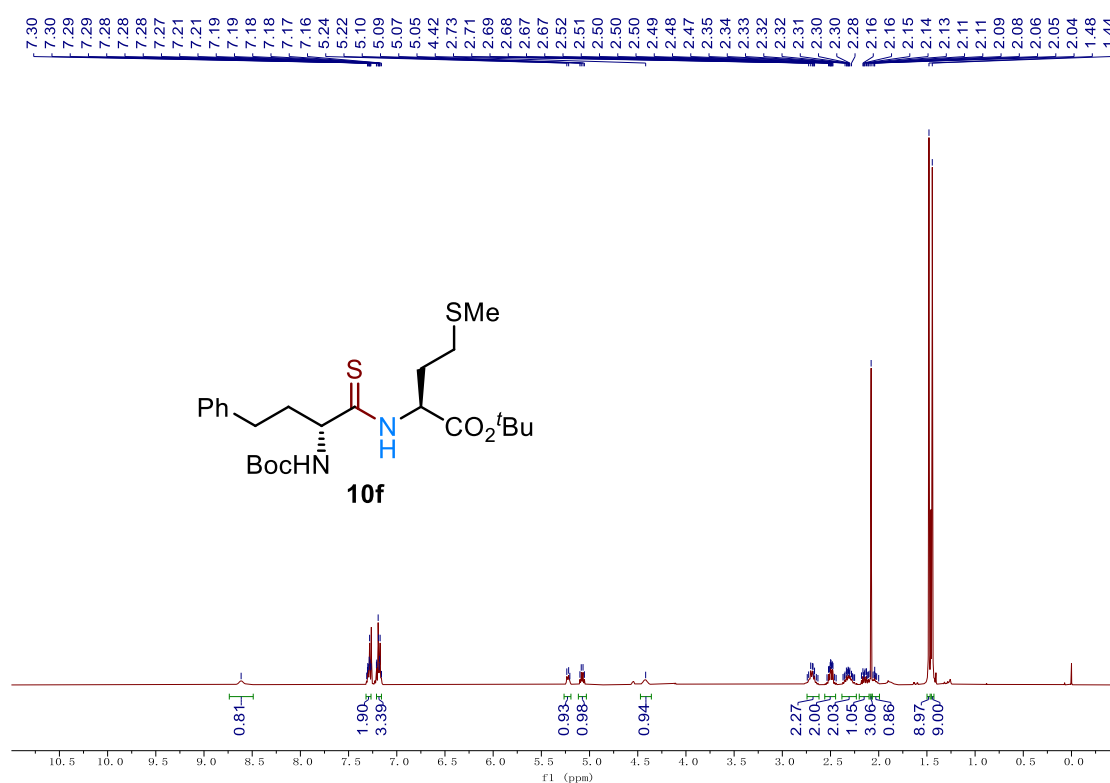



# SUPPORTING INFORMATION

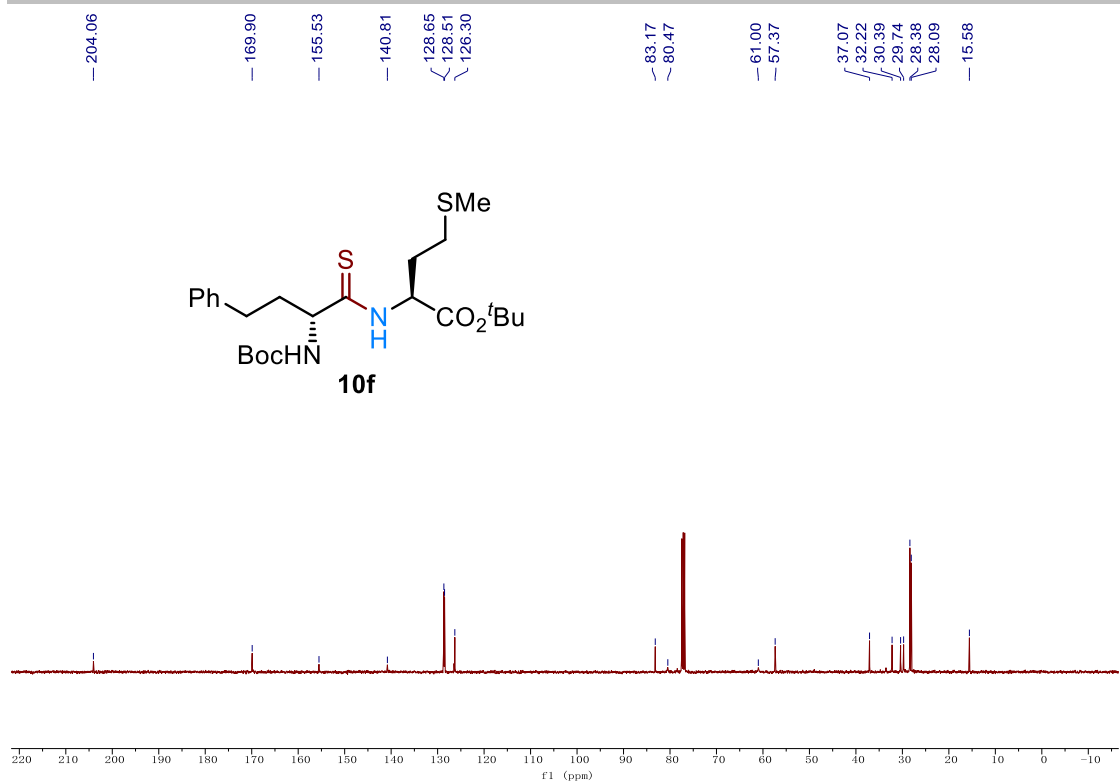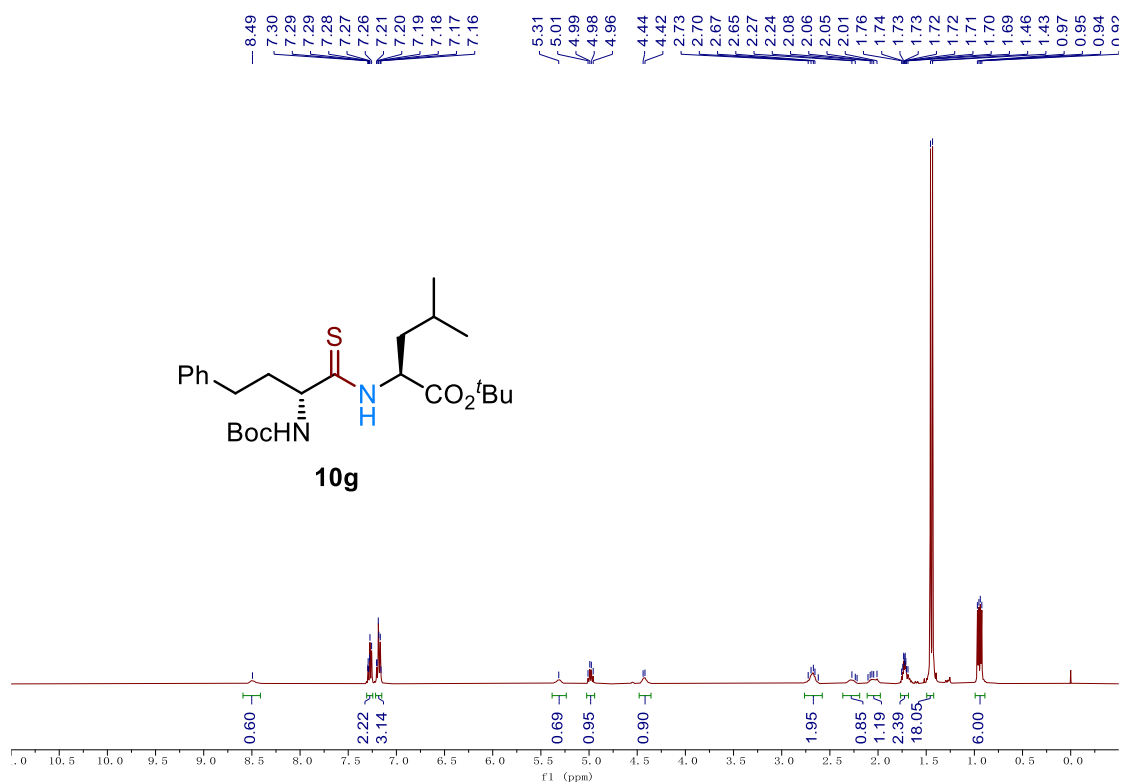

# SUPPORTING INFORMATION

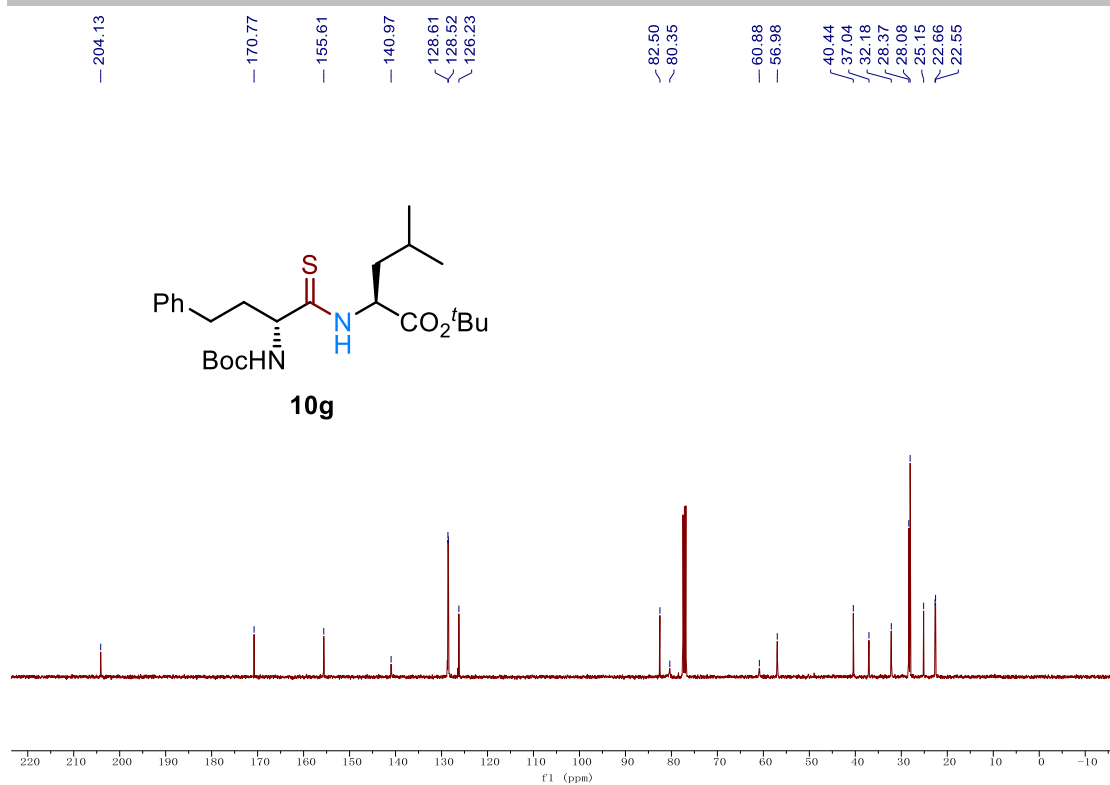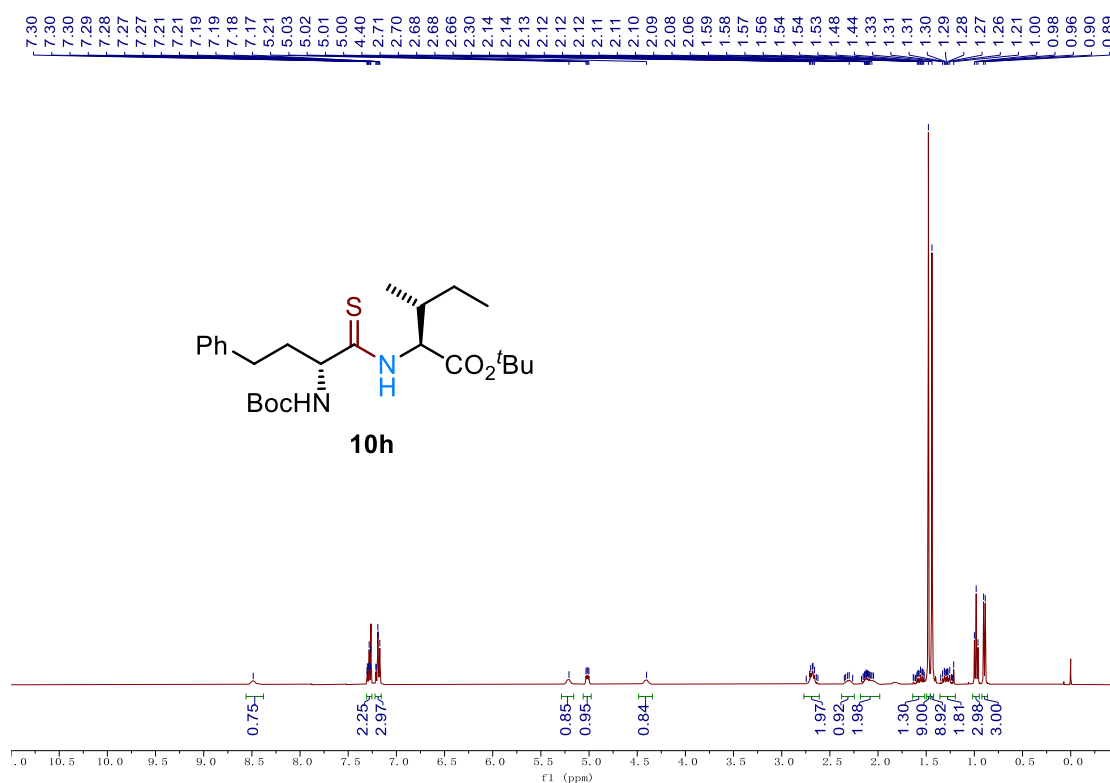

# SUPPORTING INFORMATION

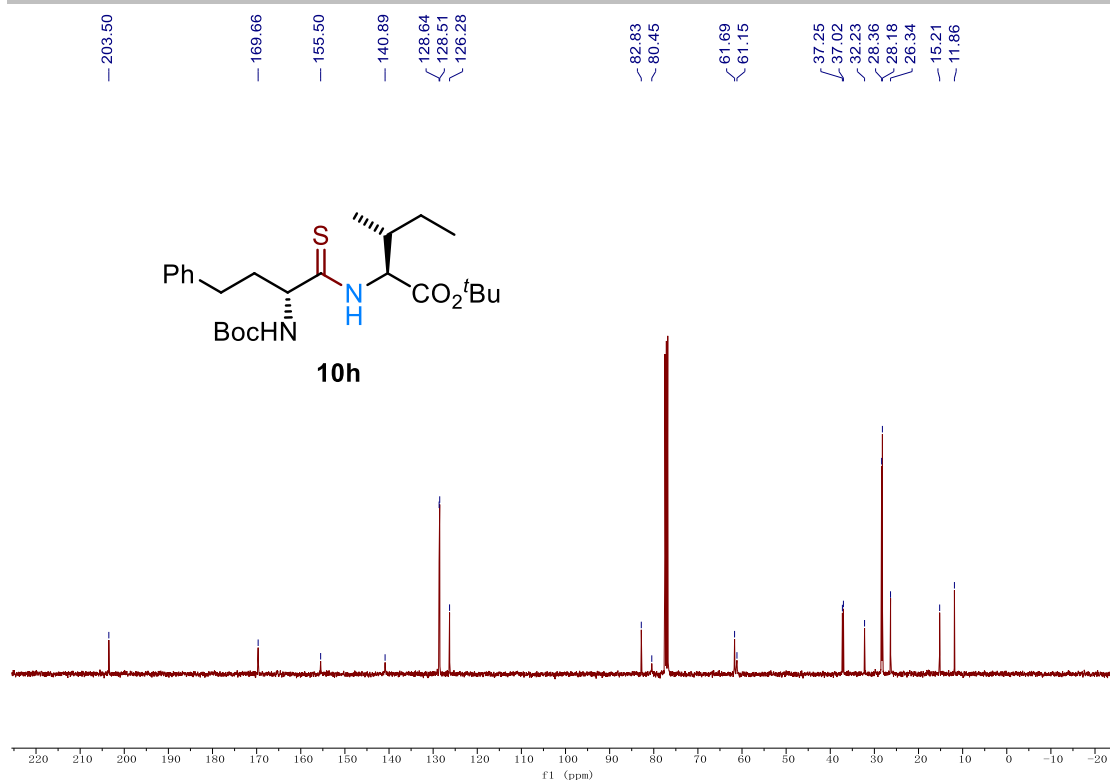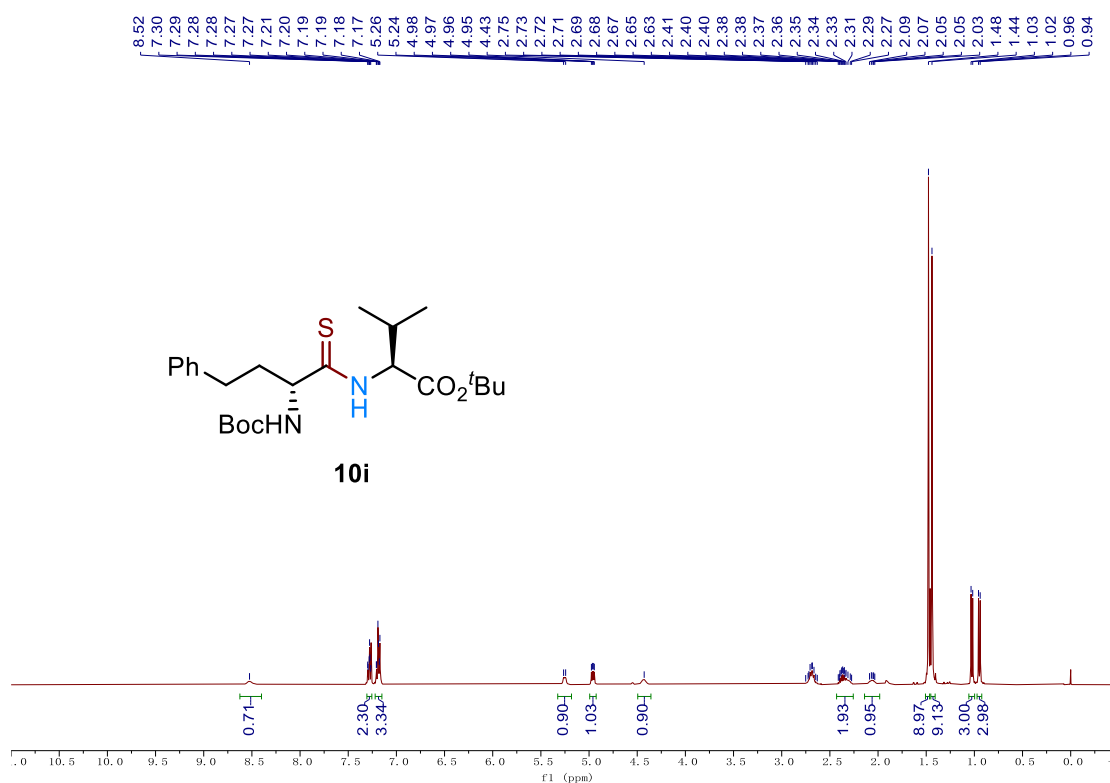

# SUPPORTING INFORMATION

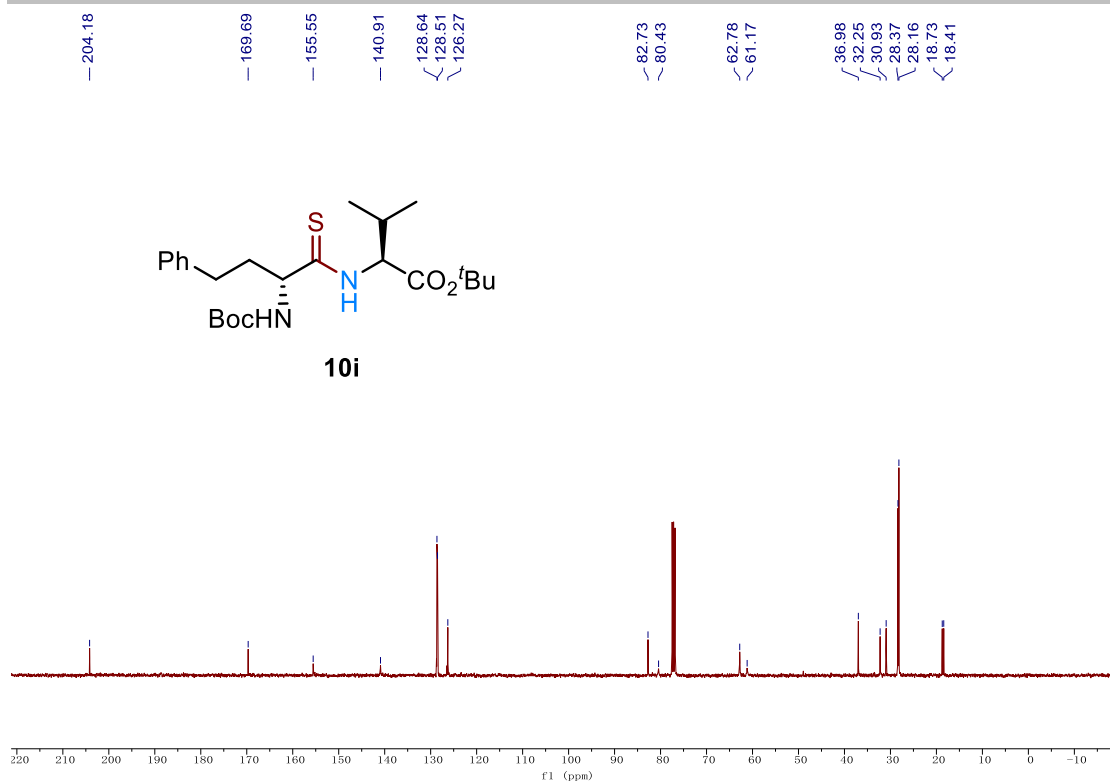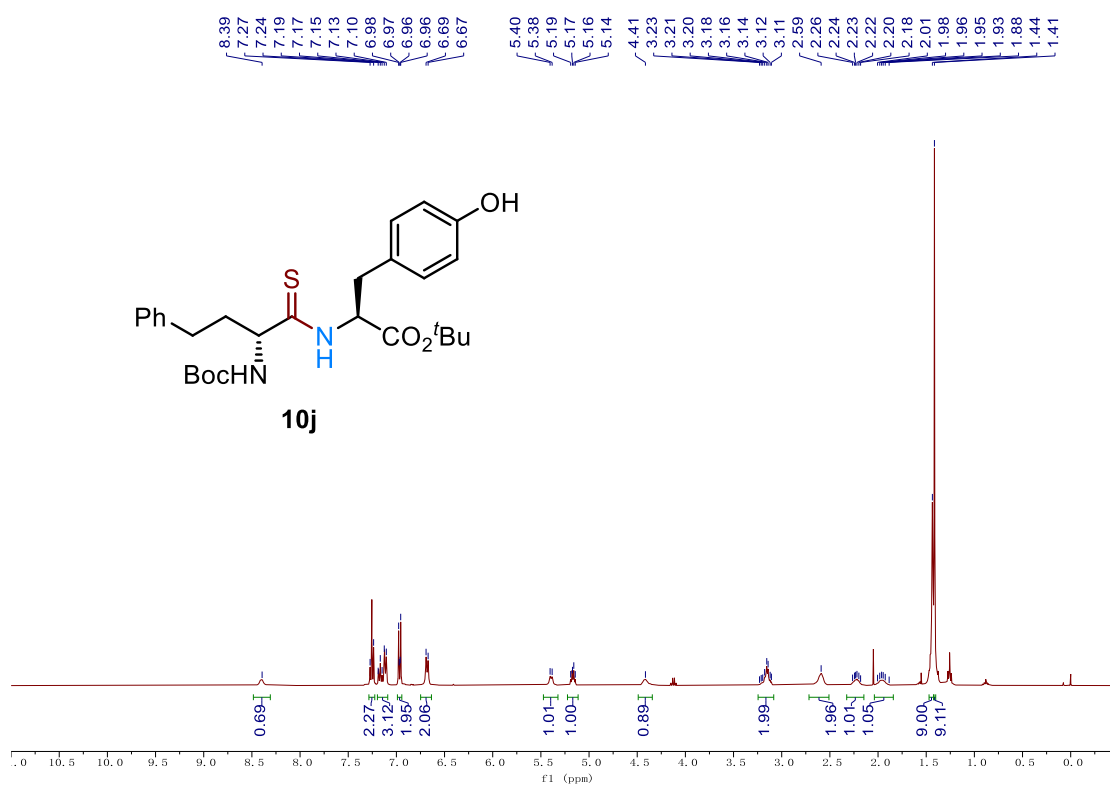

# SUPPORTING INFORMATION

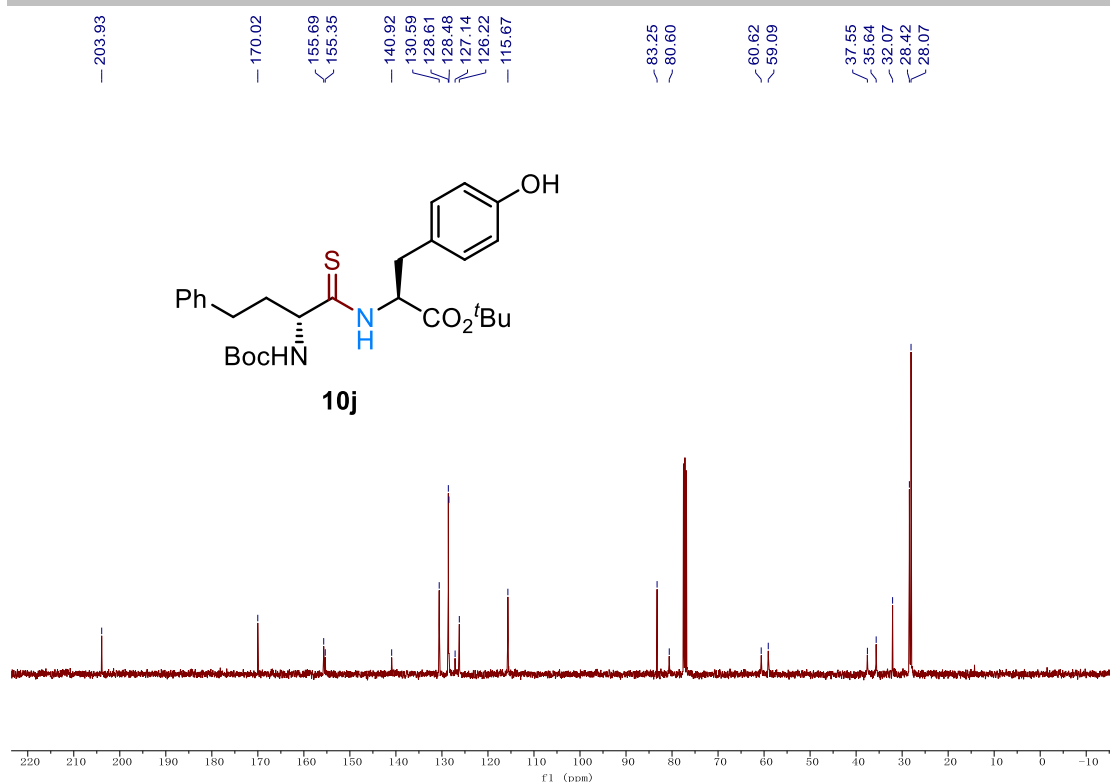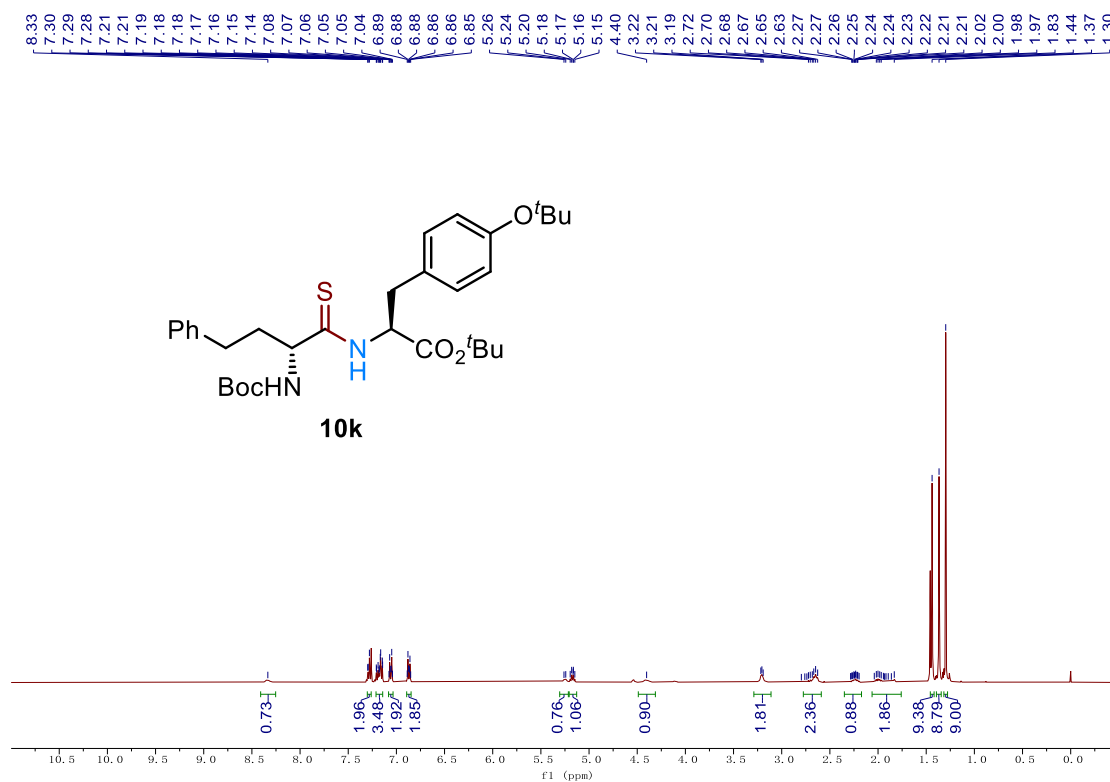

# SUPPORTING INFORMATION

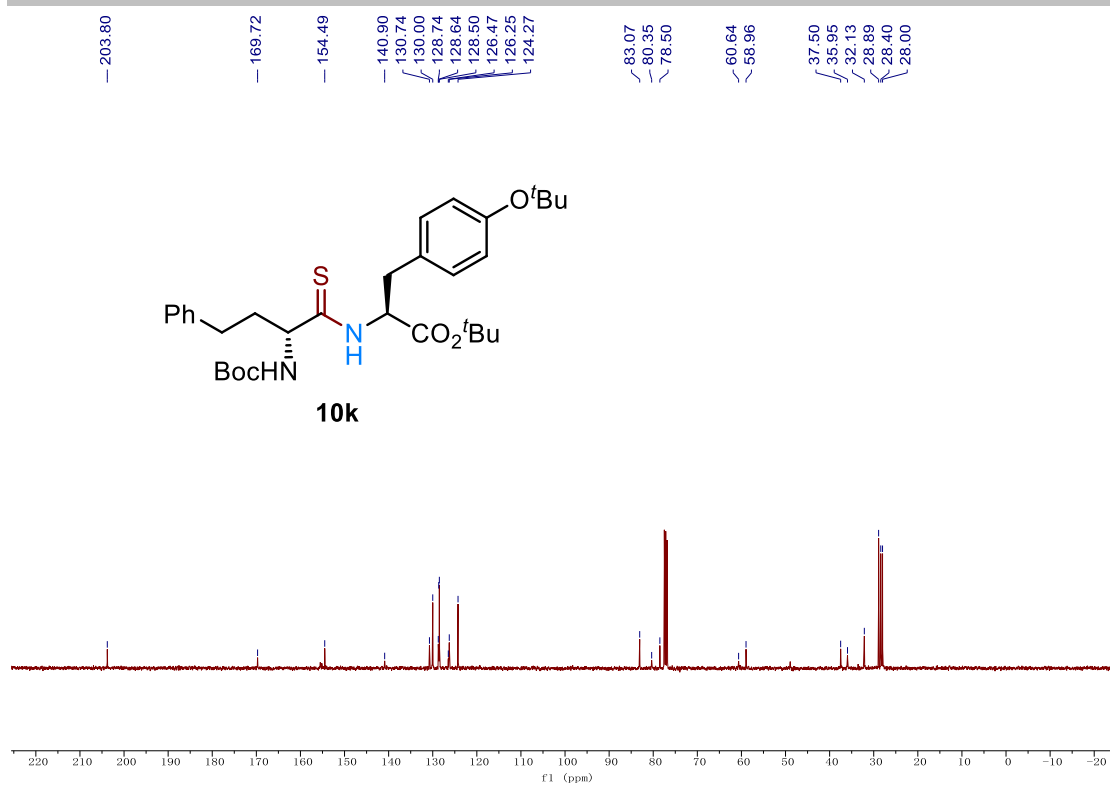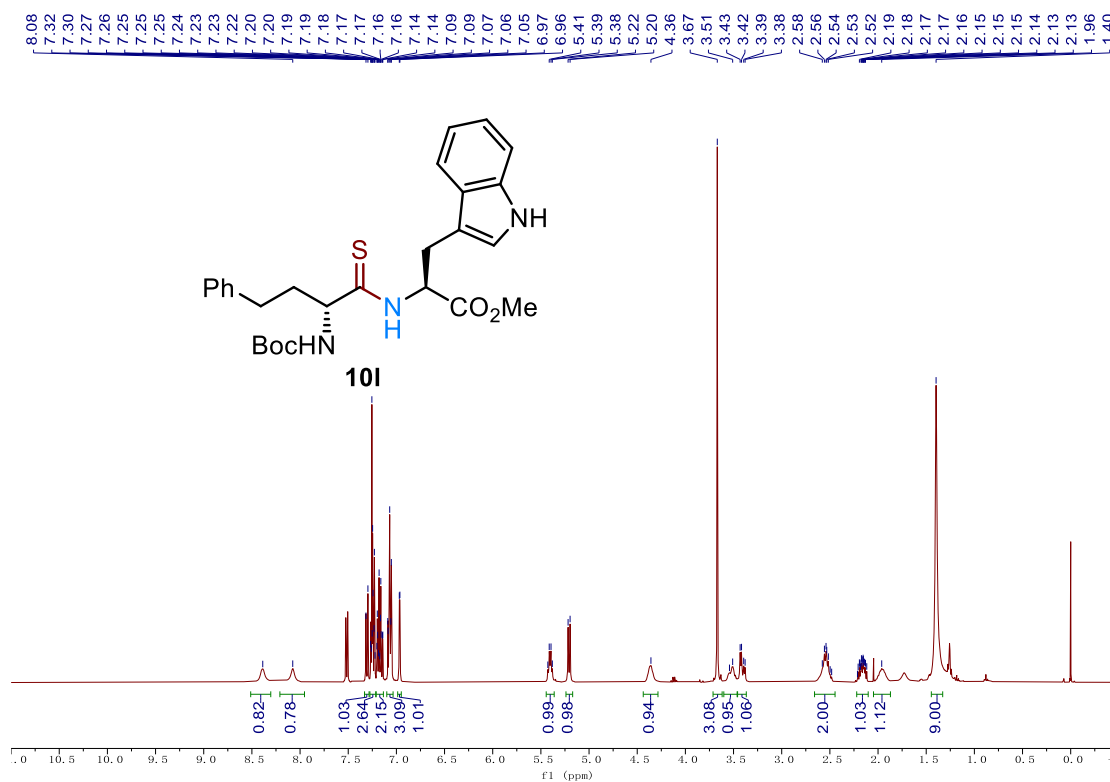

# SUPPORTING INFORMATION

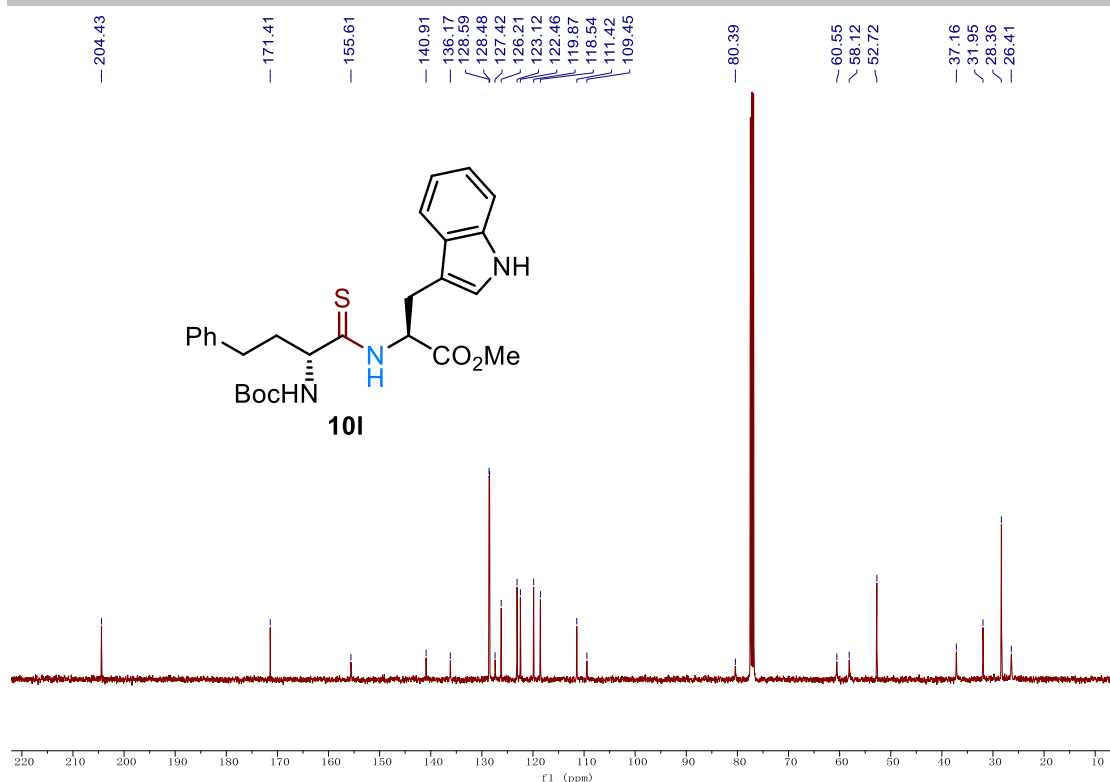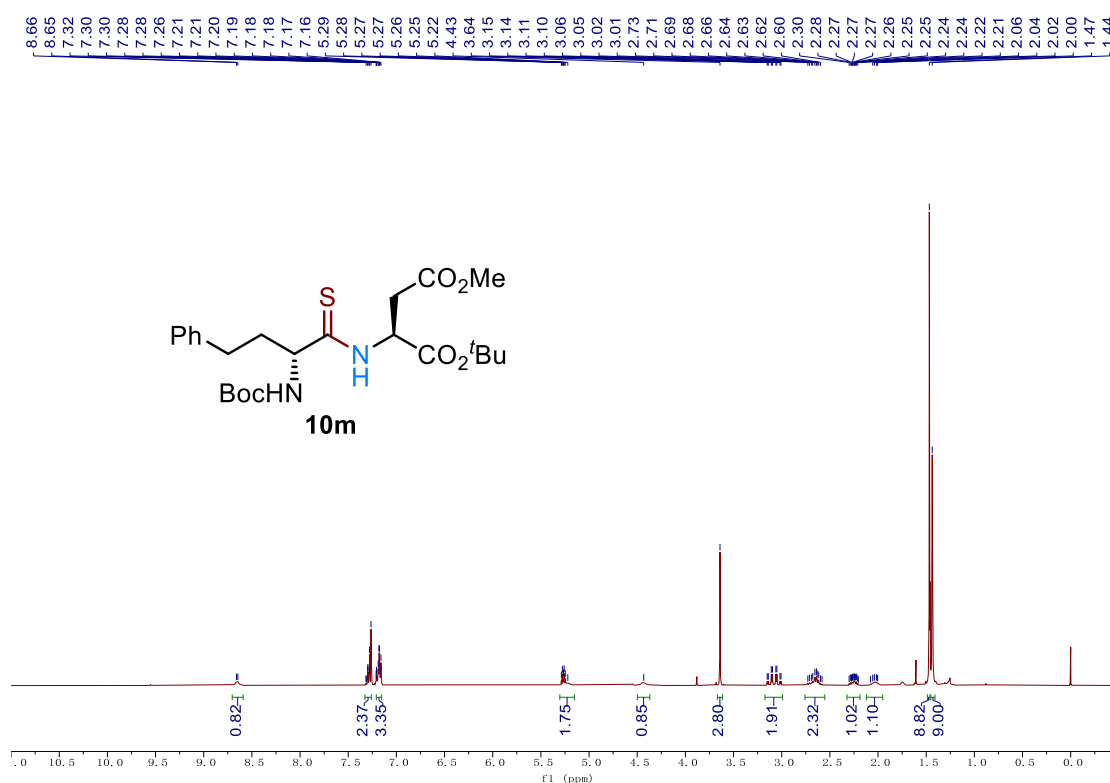

# SUPPORTING INFORMATION

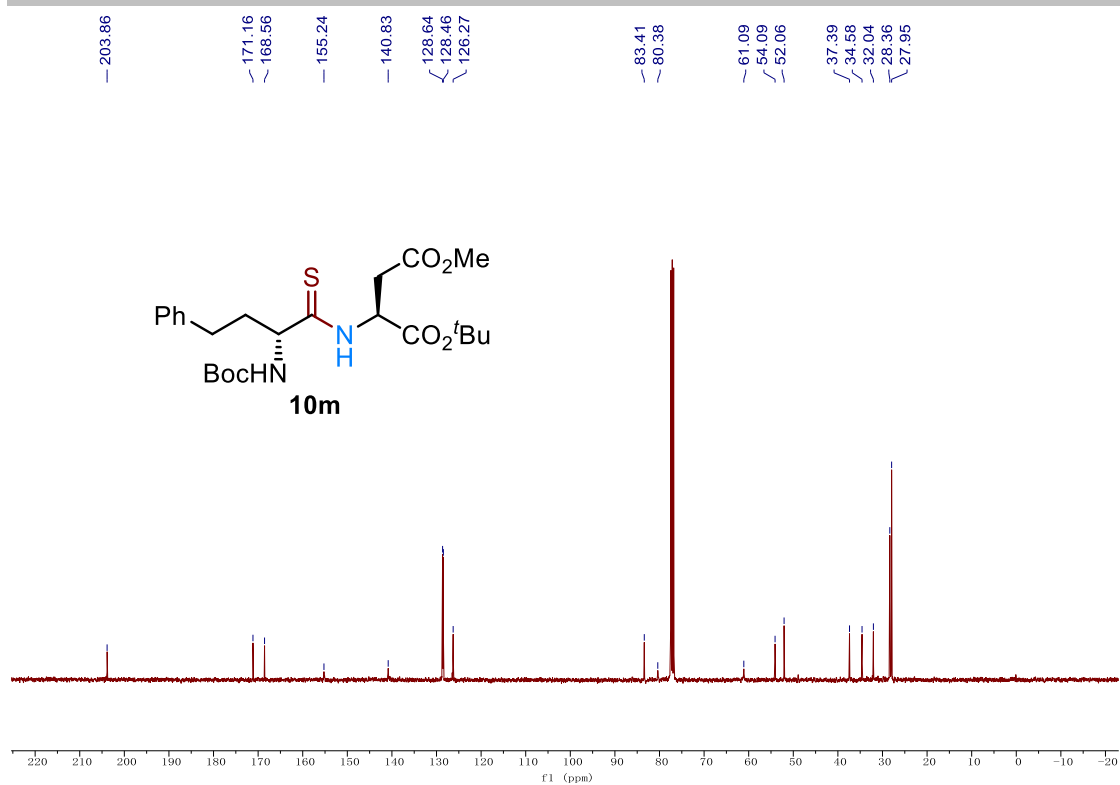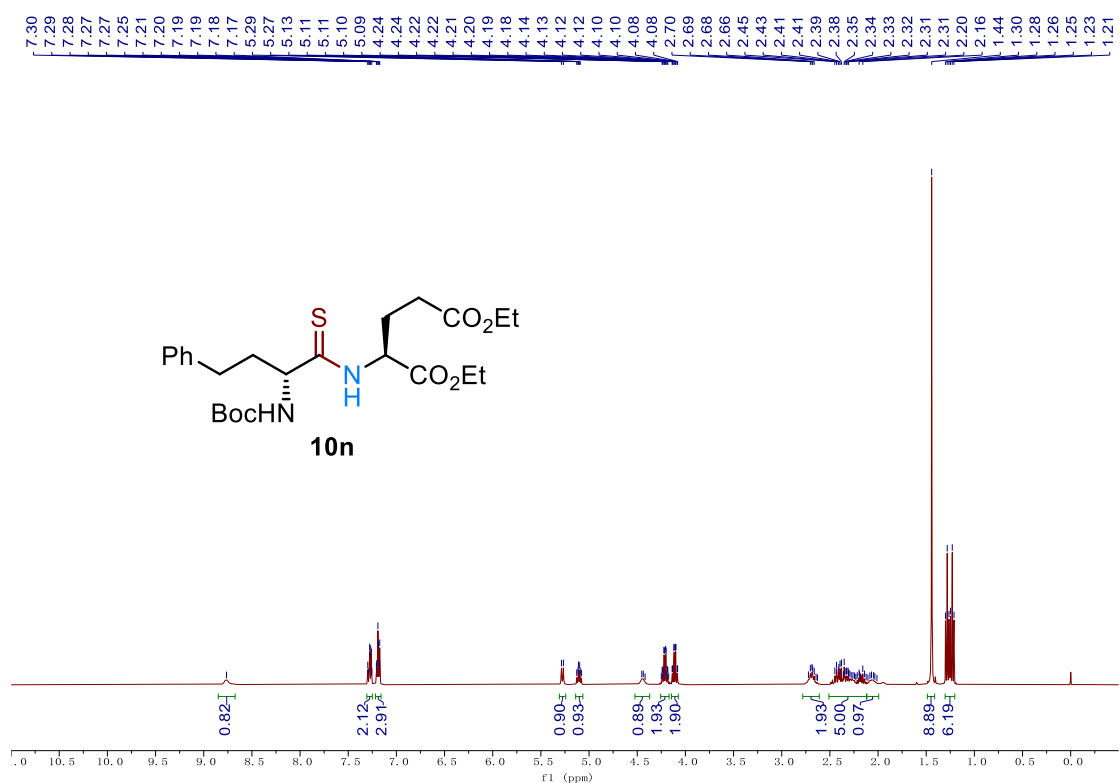



# SUPPORTING INFORMATION

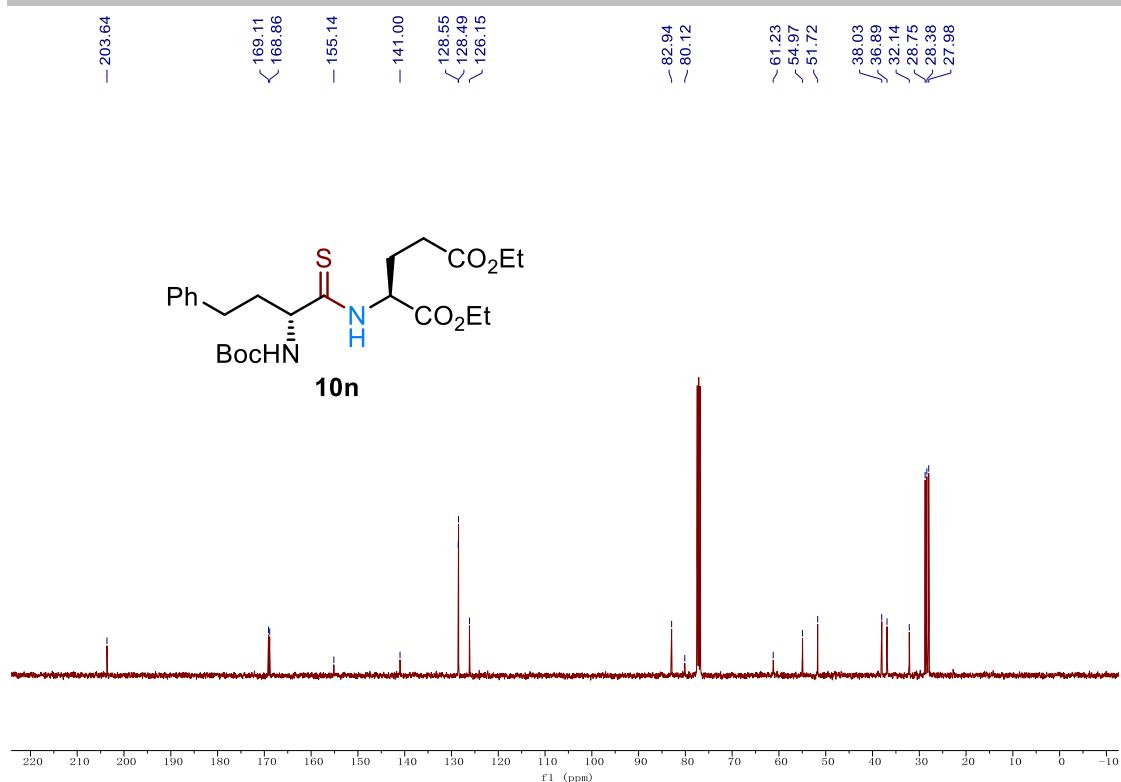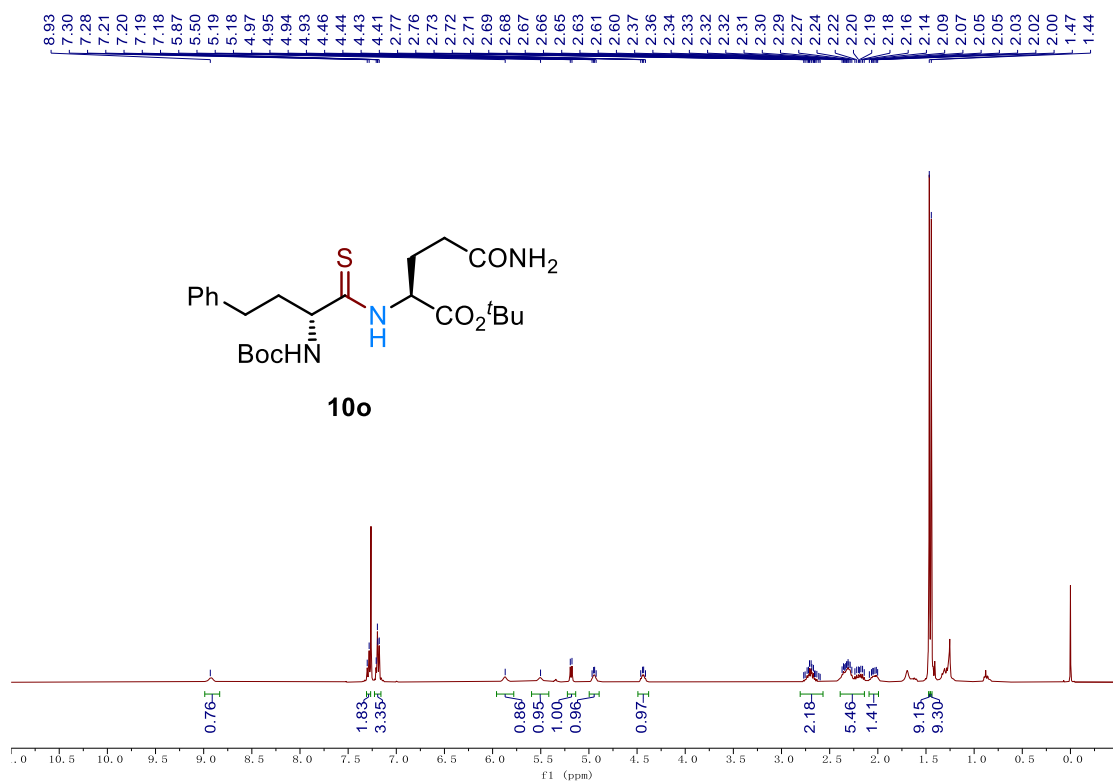

# SUPPORTING INFORMATION

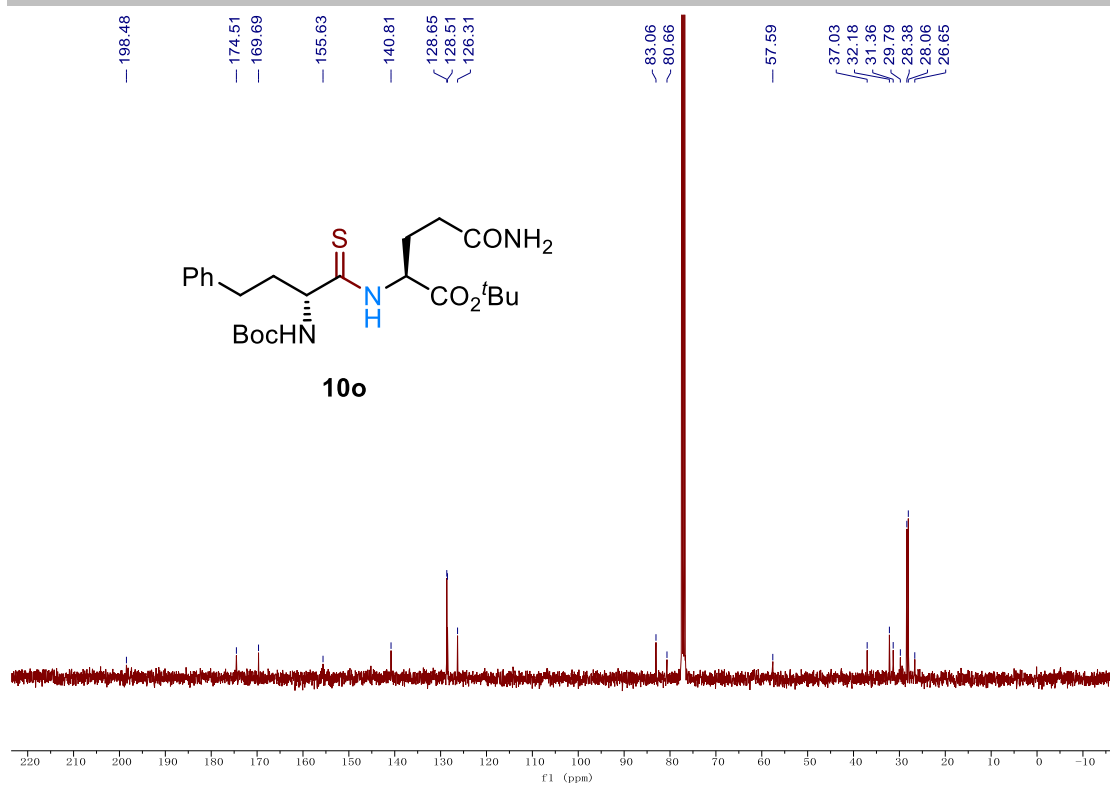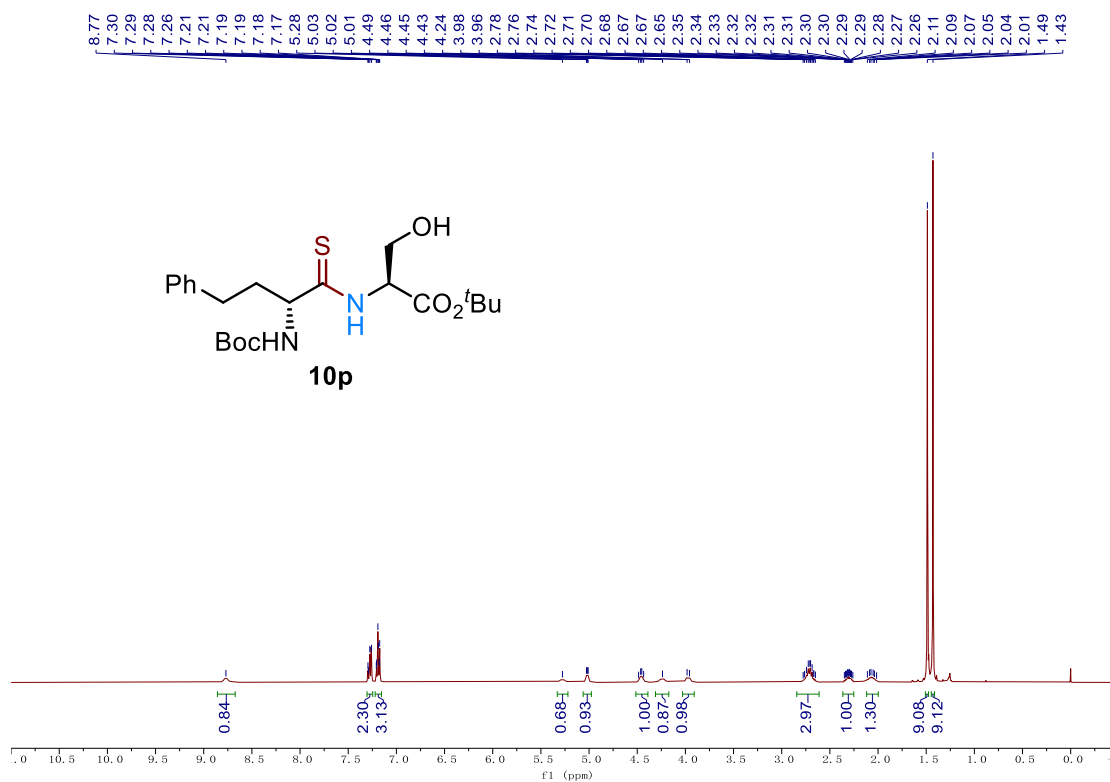

# SUPPORTING INFORMATION

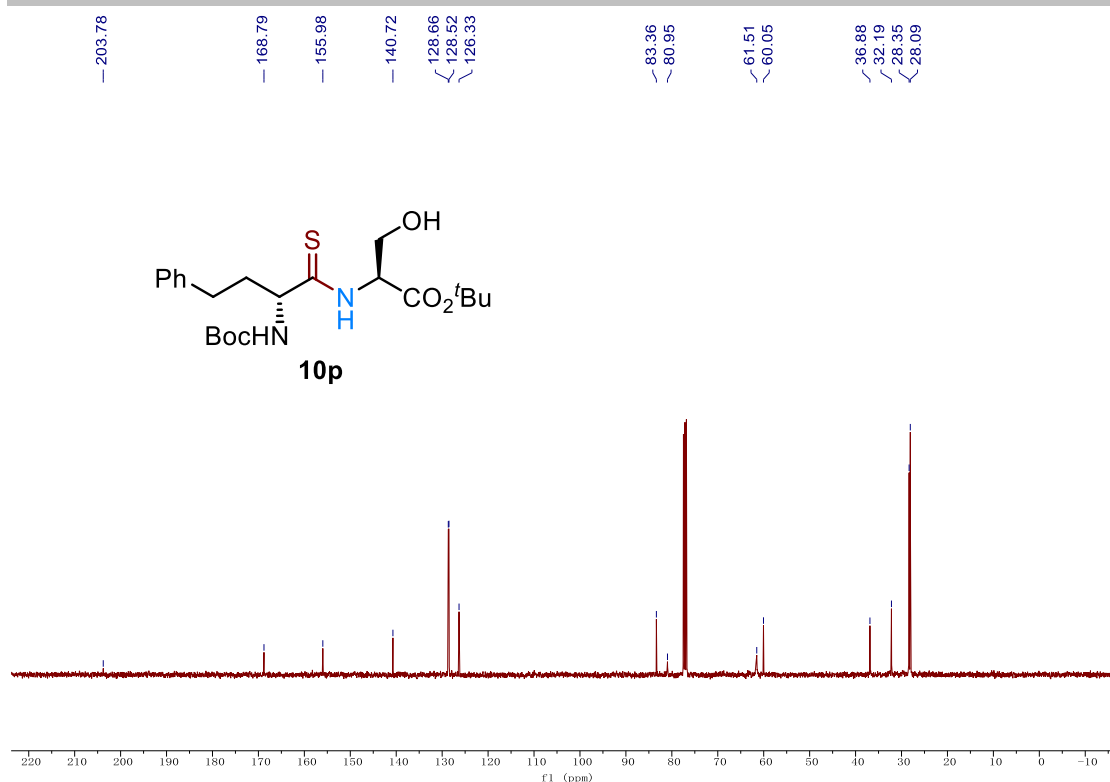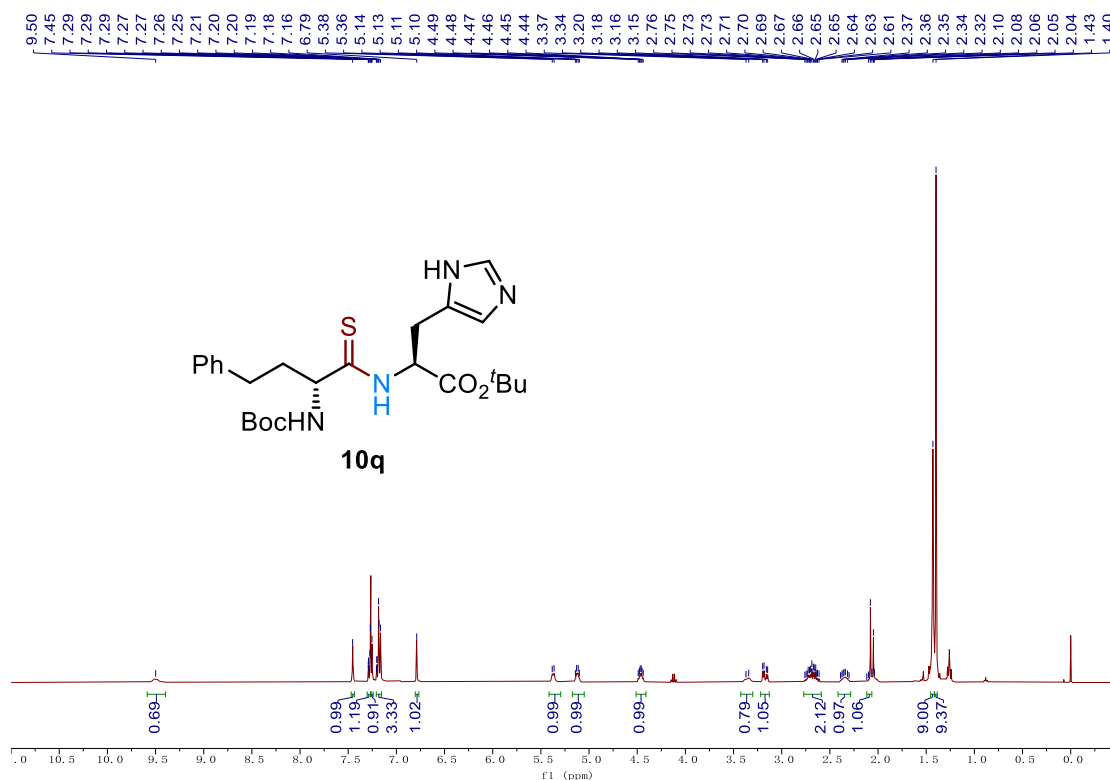

# SUPPORTING INFORMATION

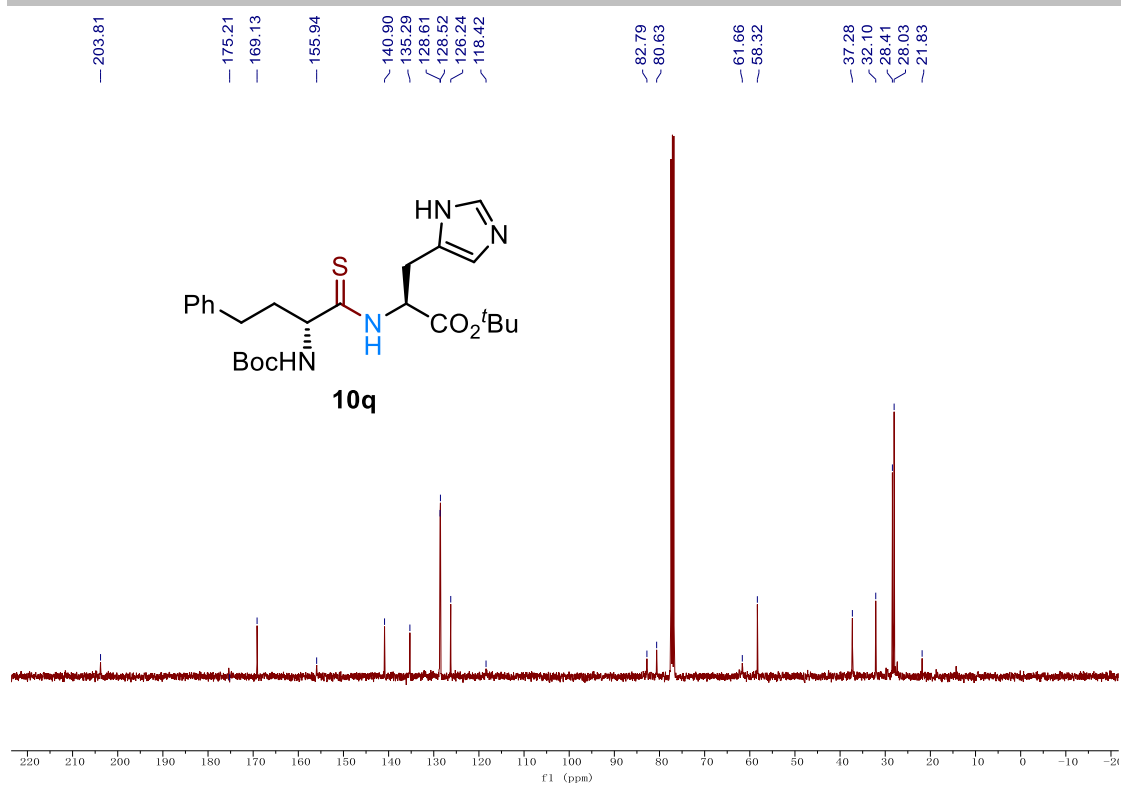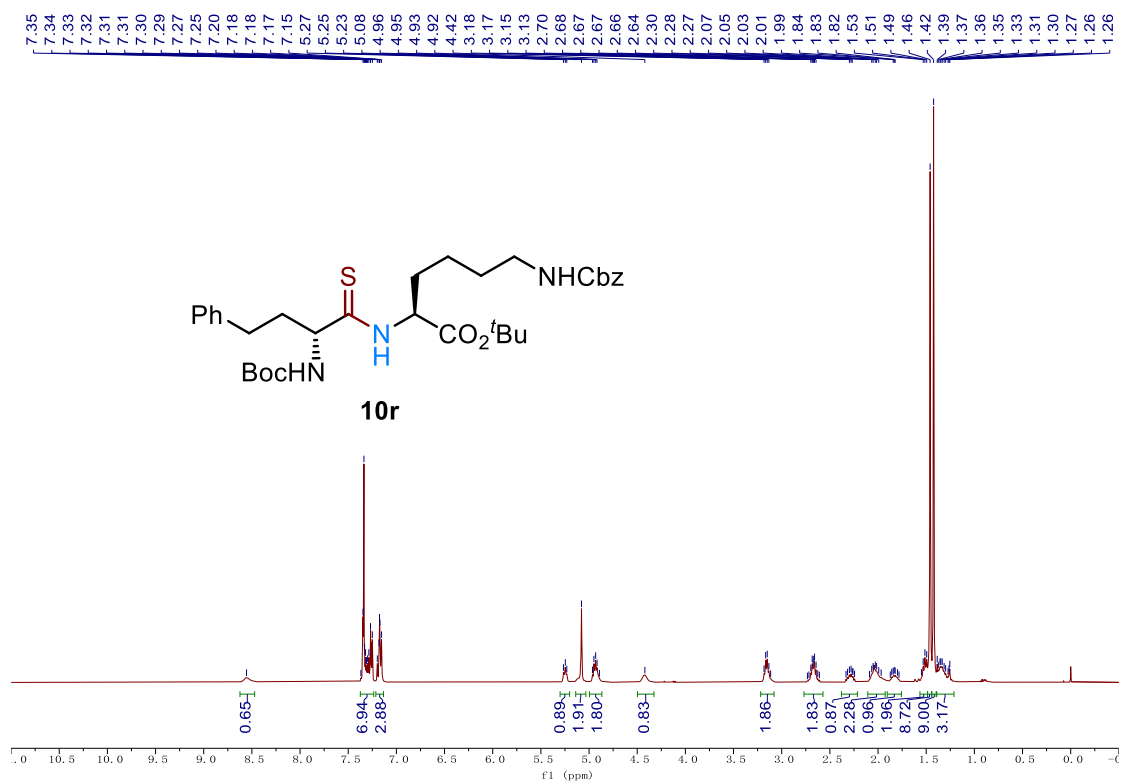

# SUPPORTING INFORMATION

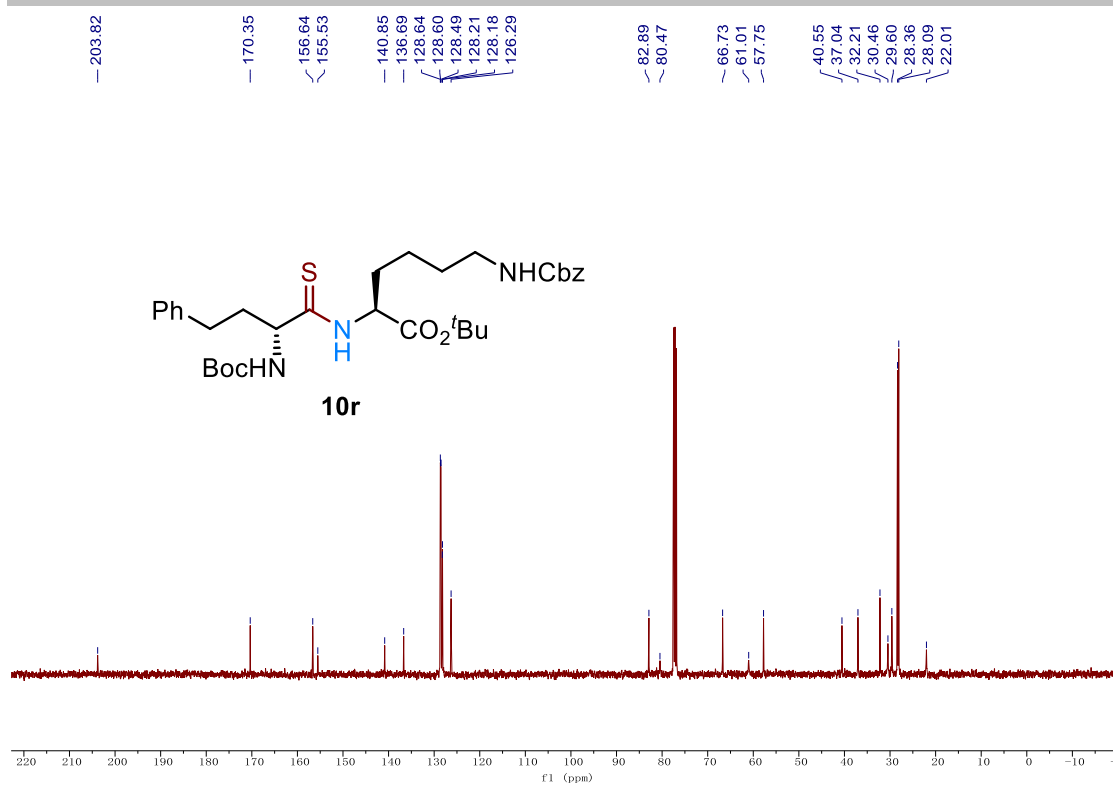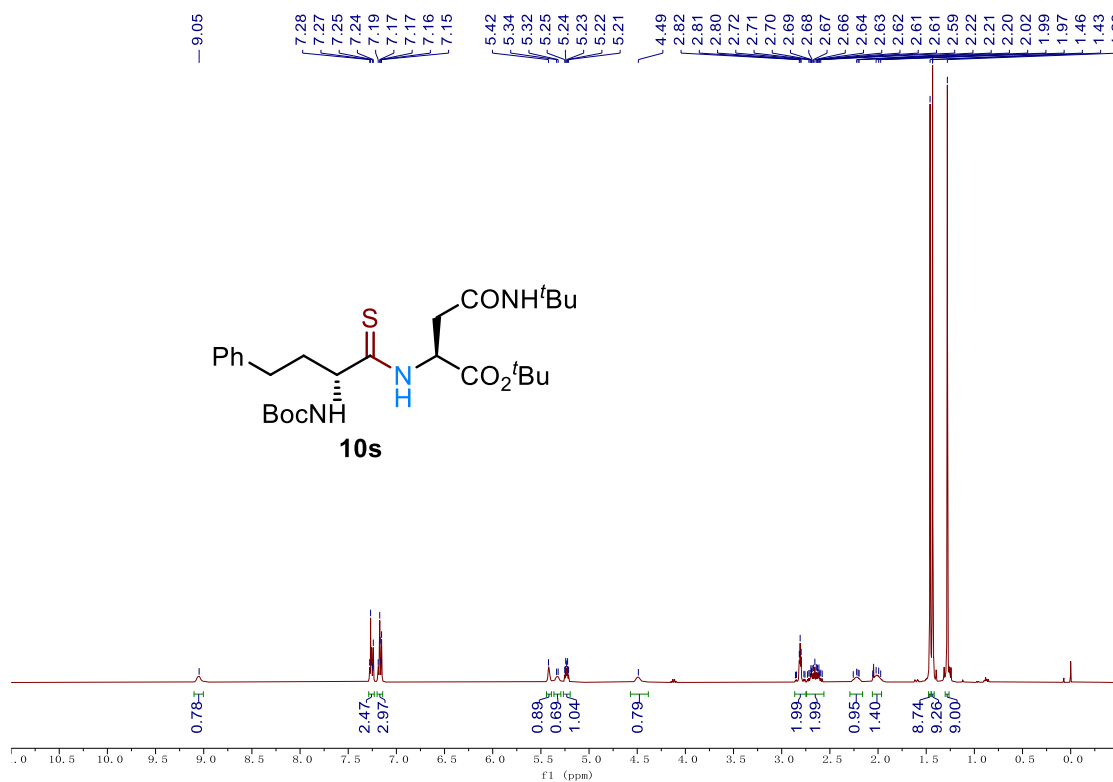

[illegible]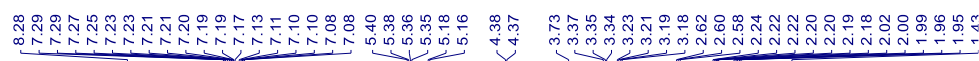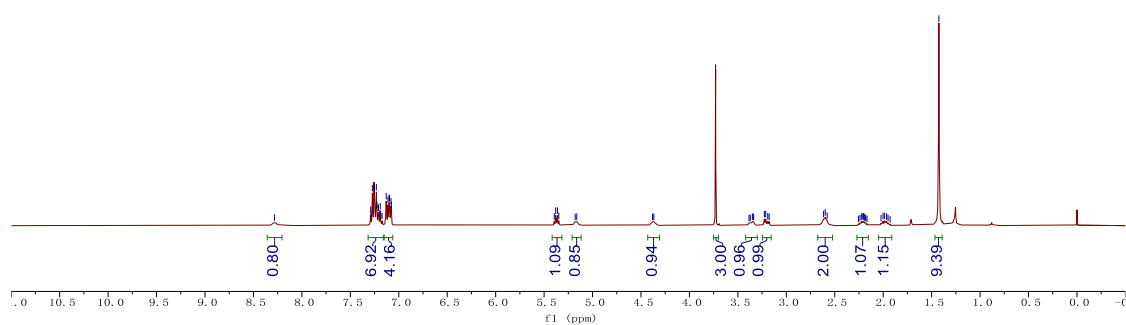

# SUPPORTING INFORMATION

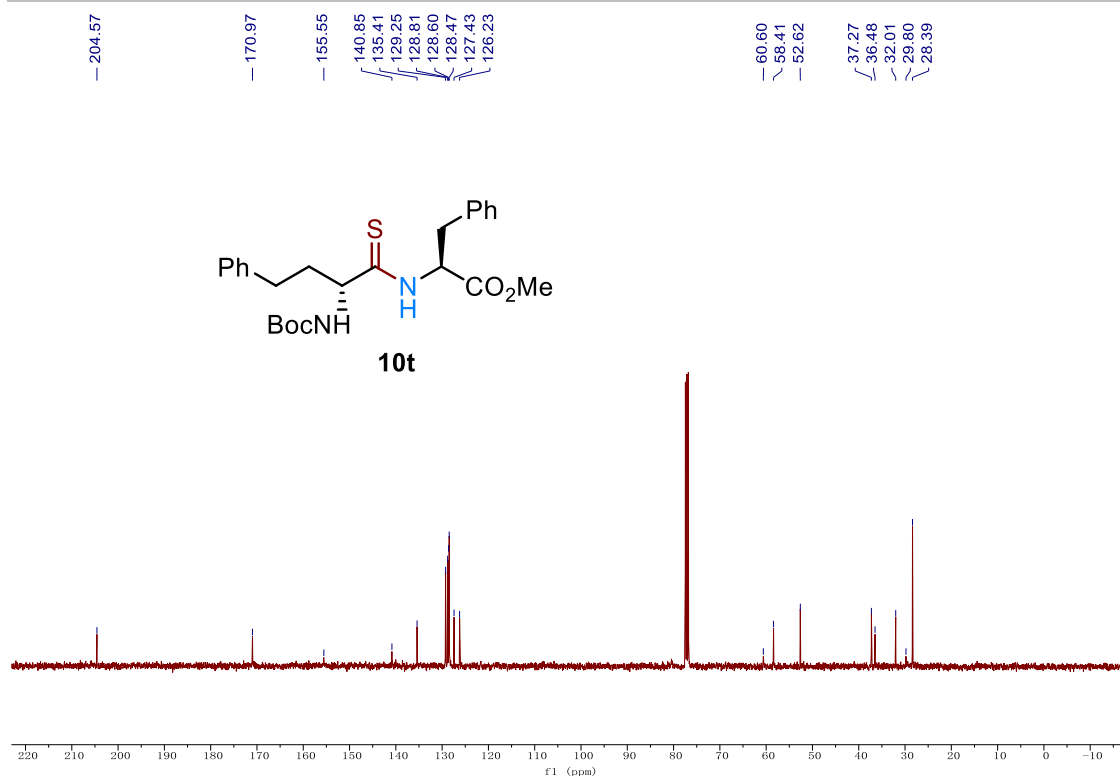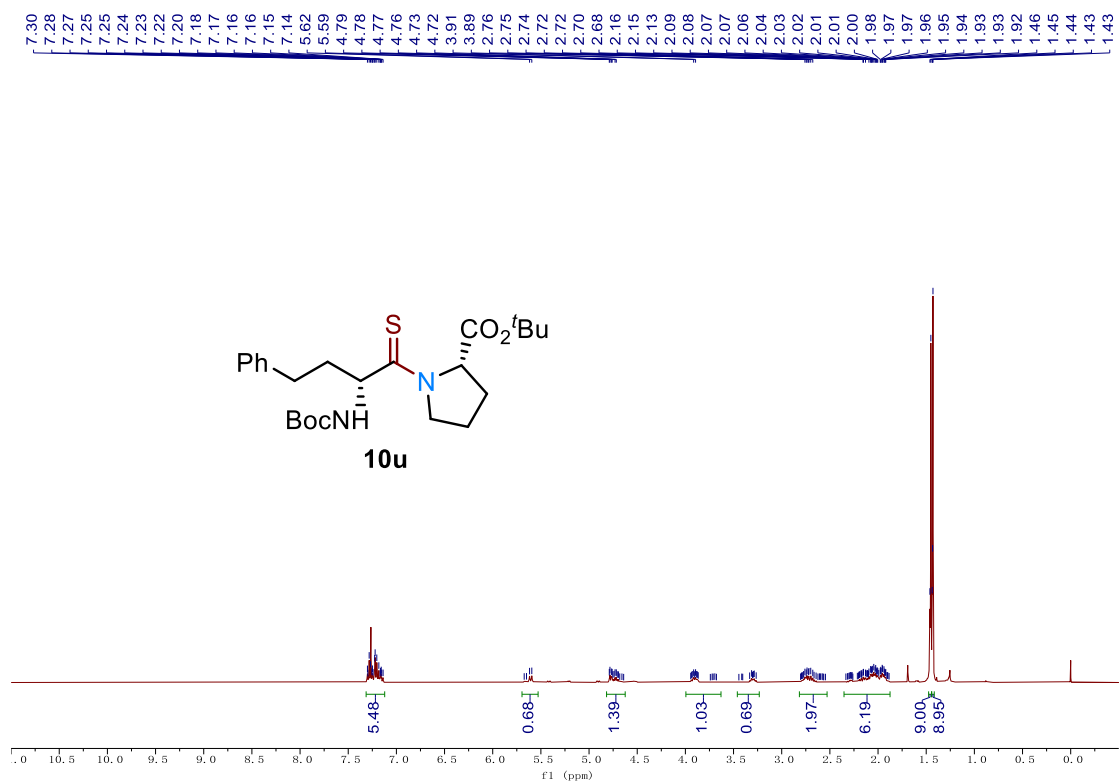

## SUPPORTING INFORMATION

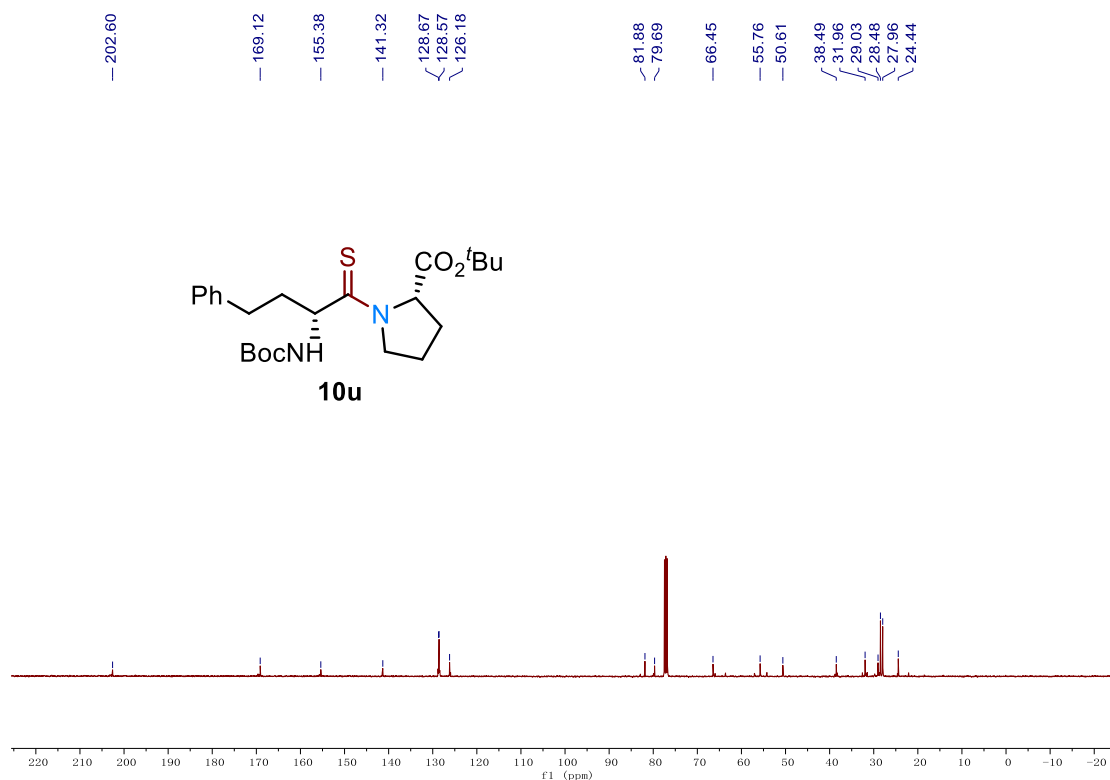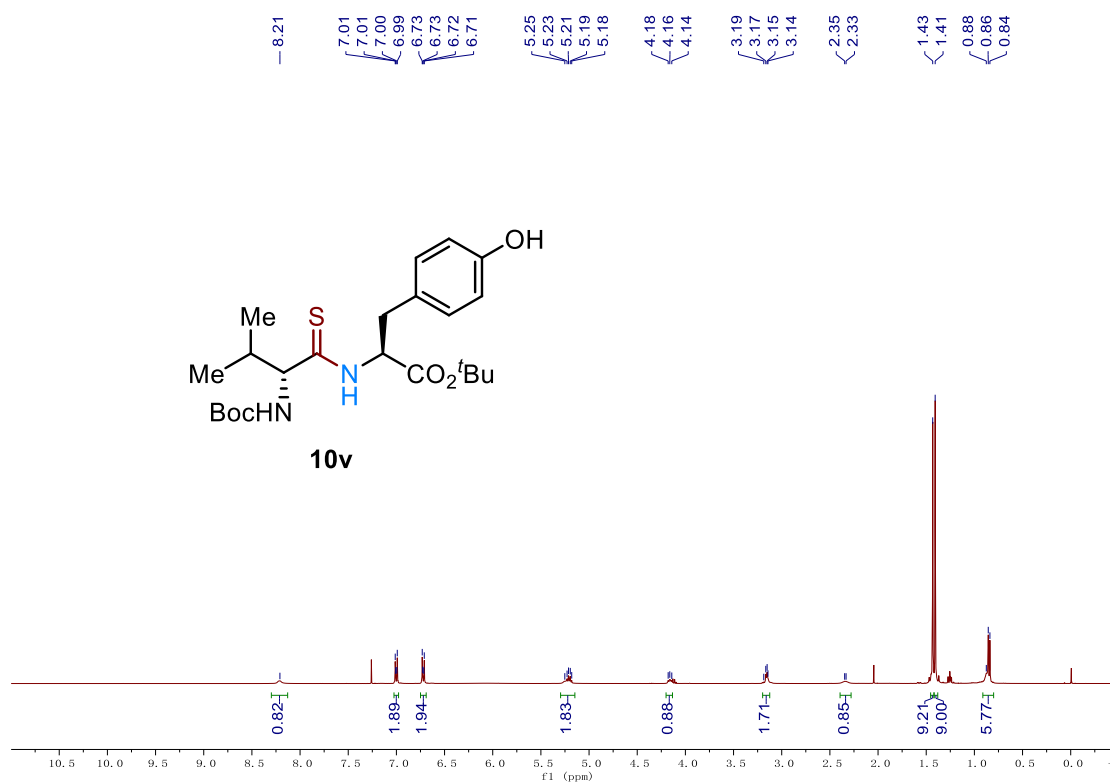



# SUPPORTING INFORMATION

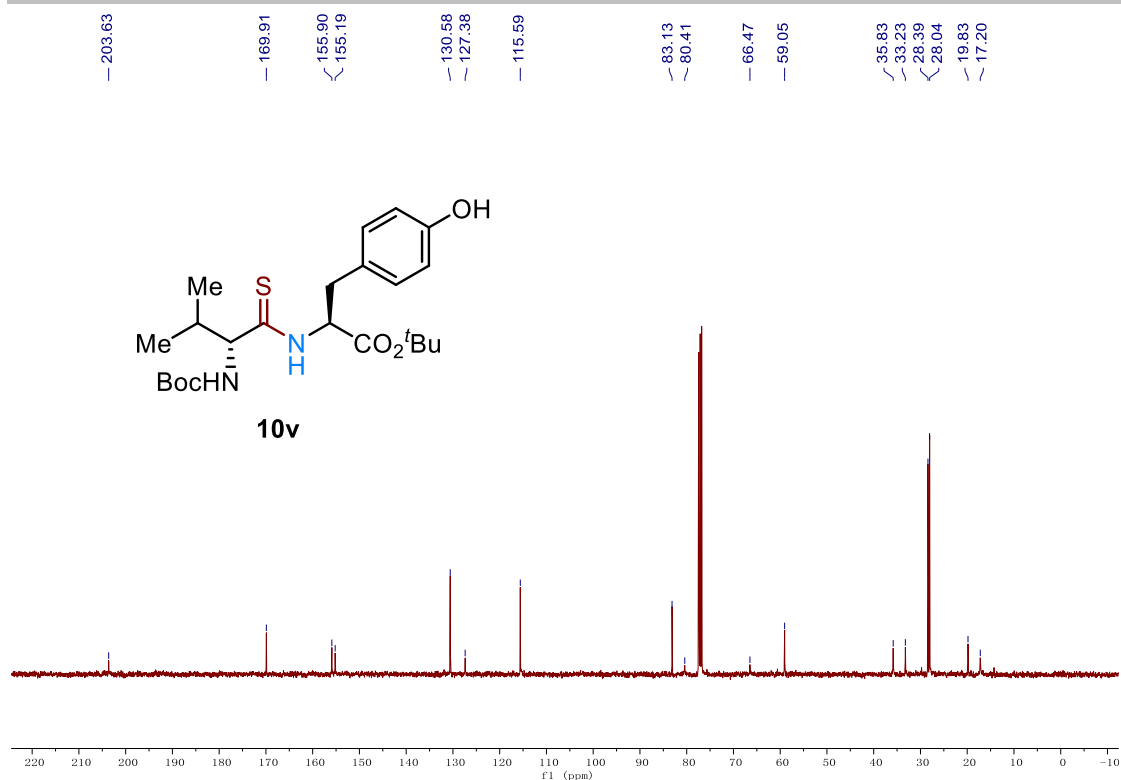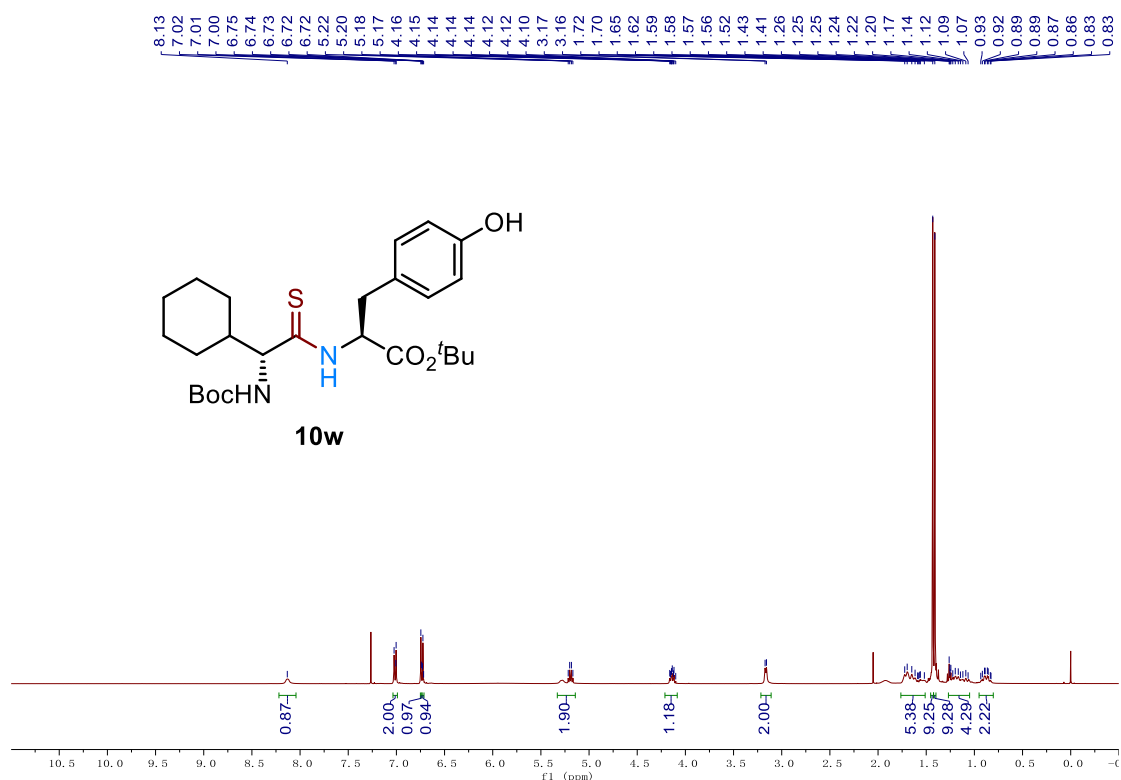

# SUPPORTING INFORMATION

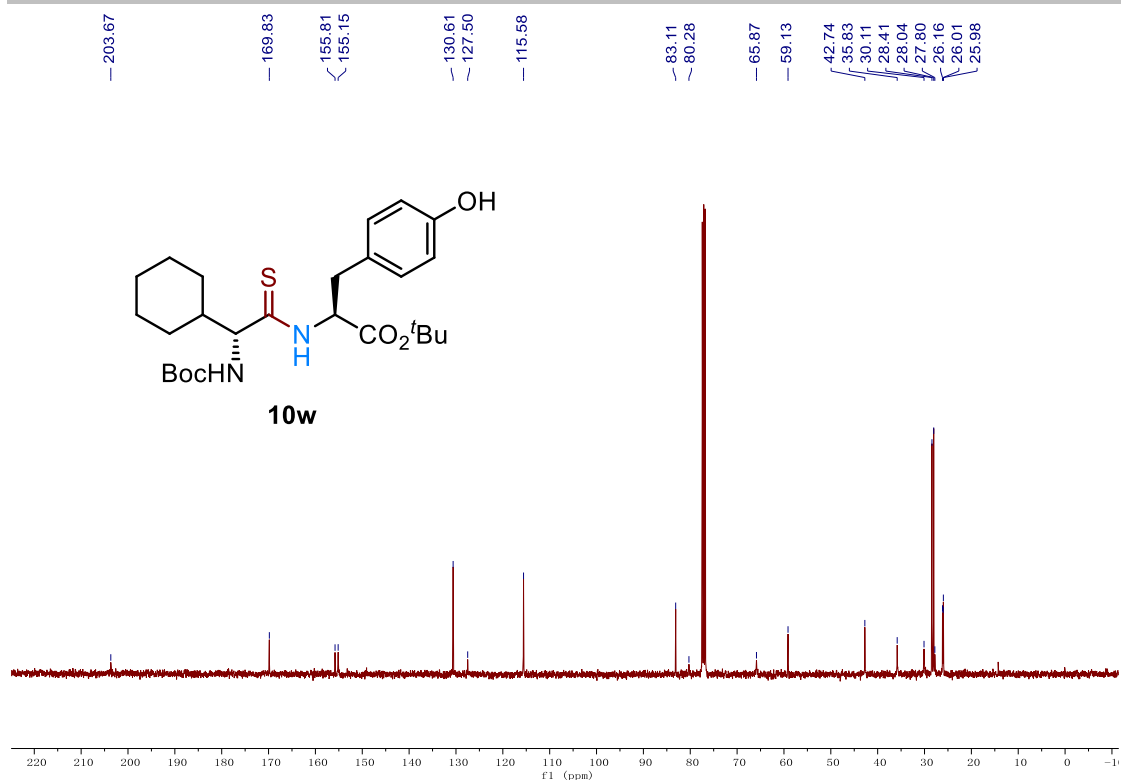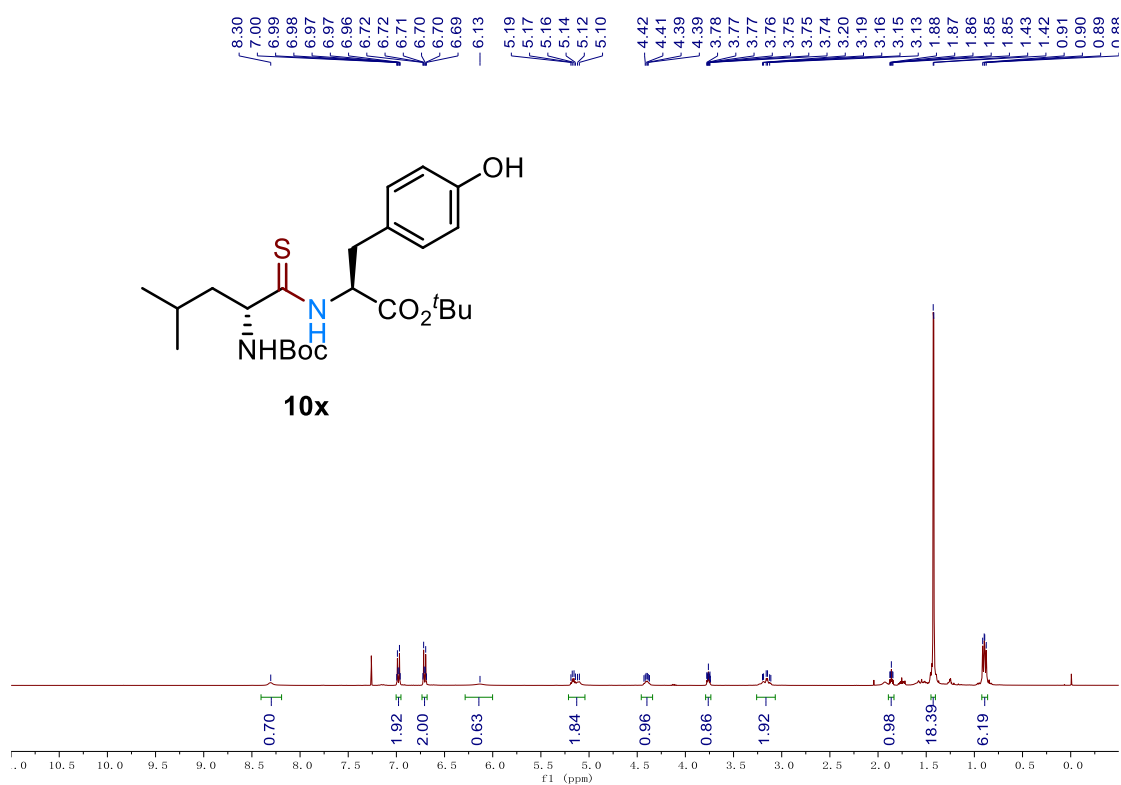

# SUPPORTING INFORMATION

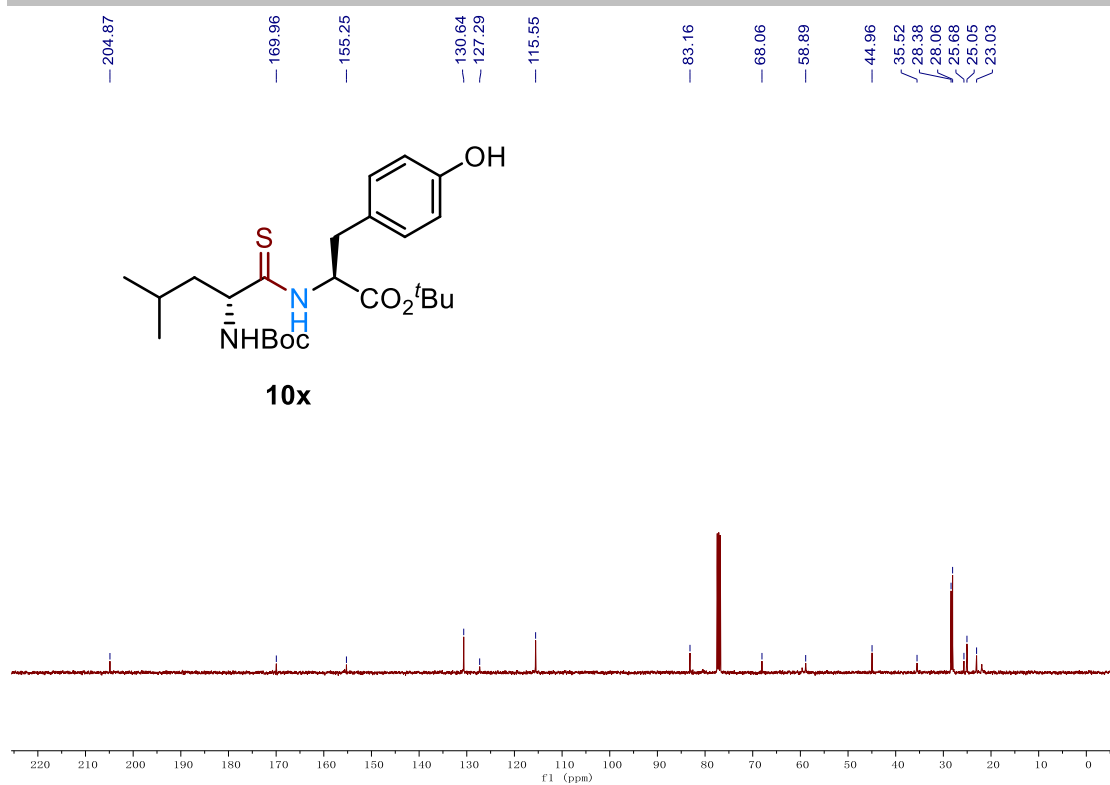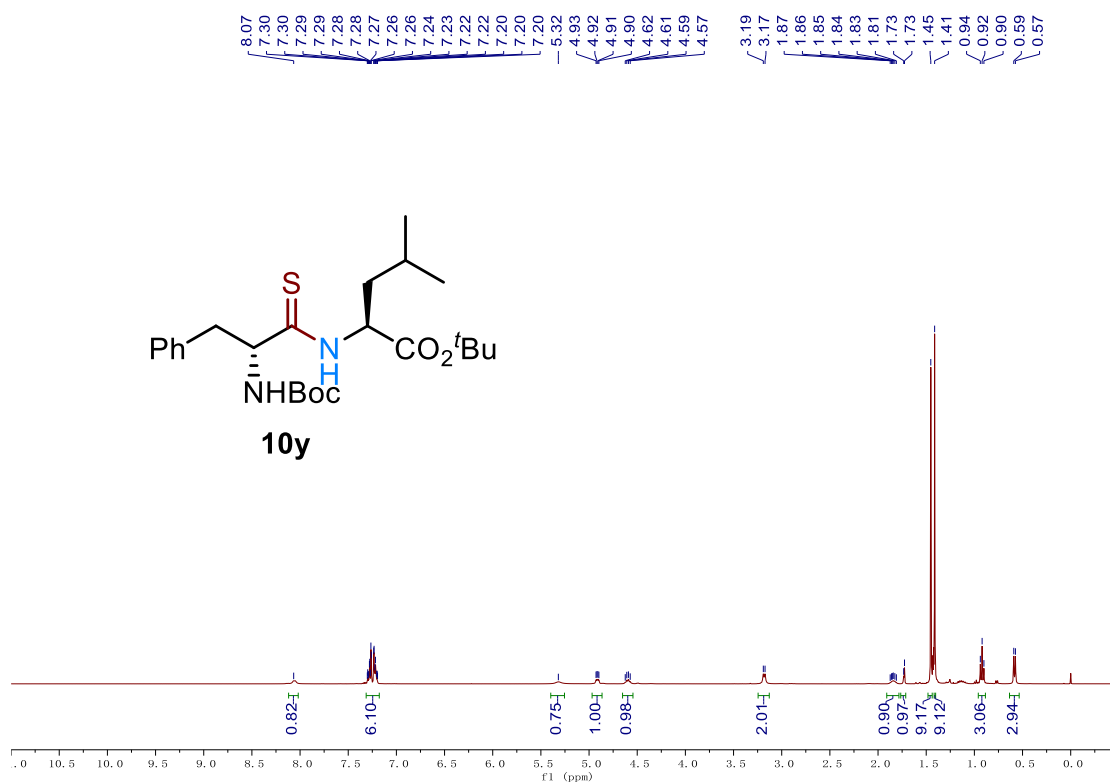

[illegible]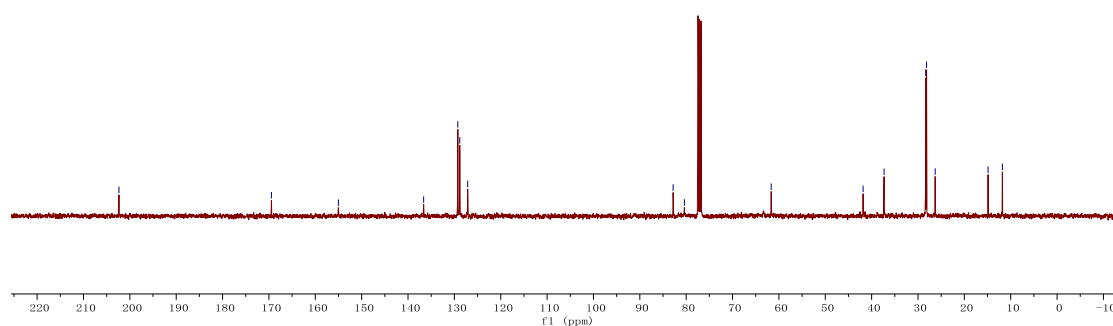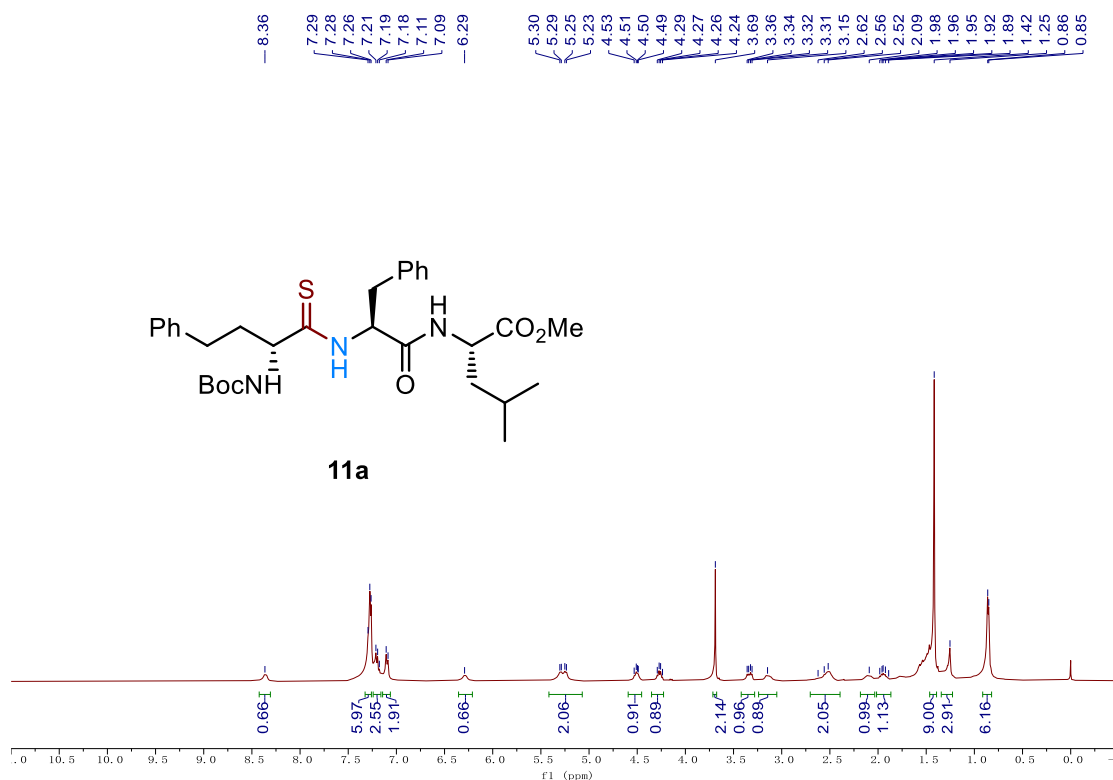

# SUPPORTING INFORMATION

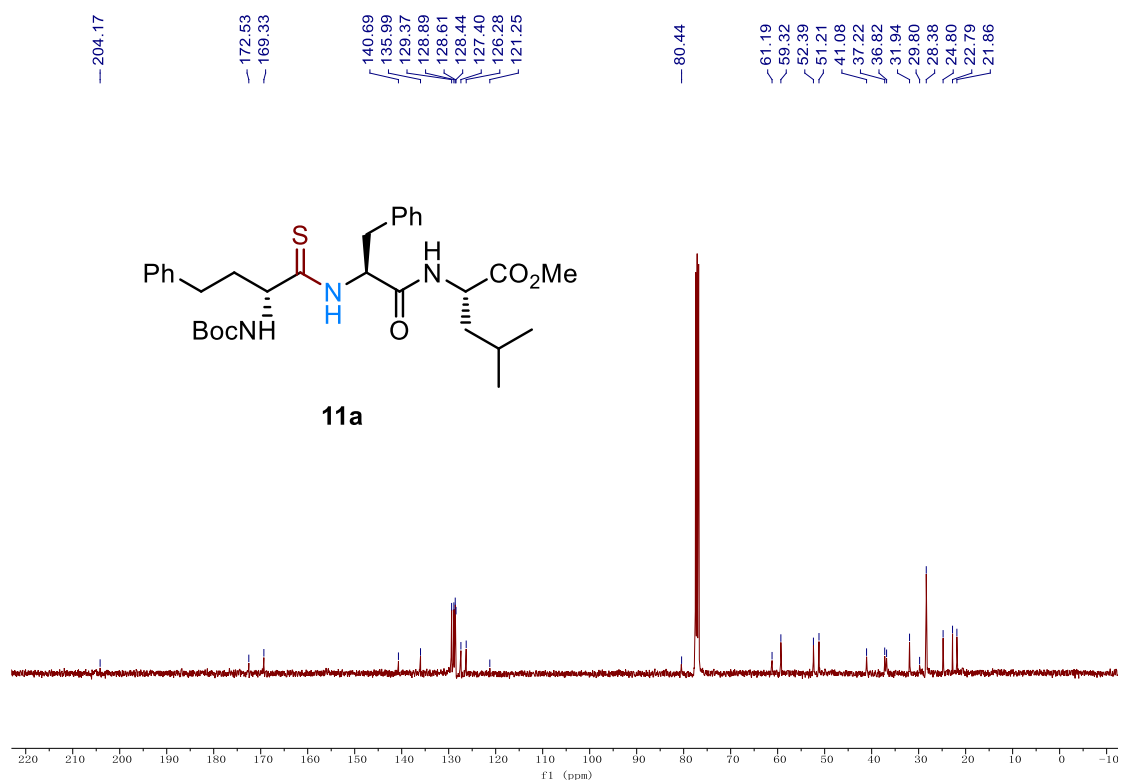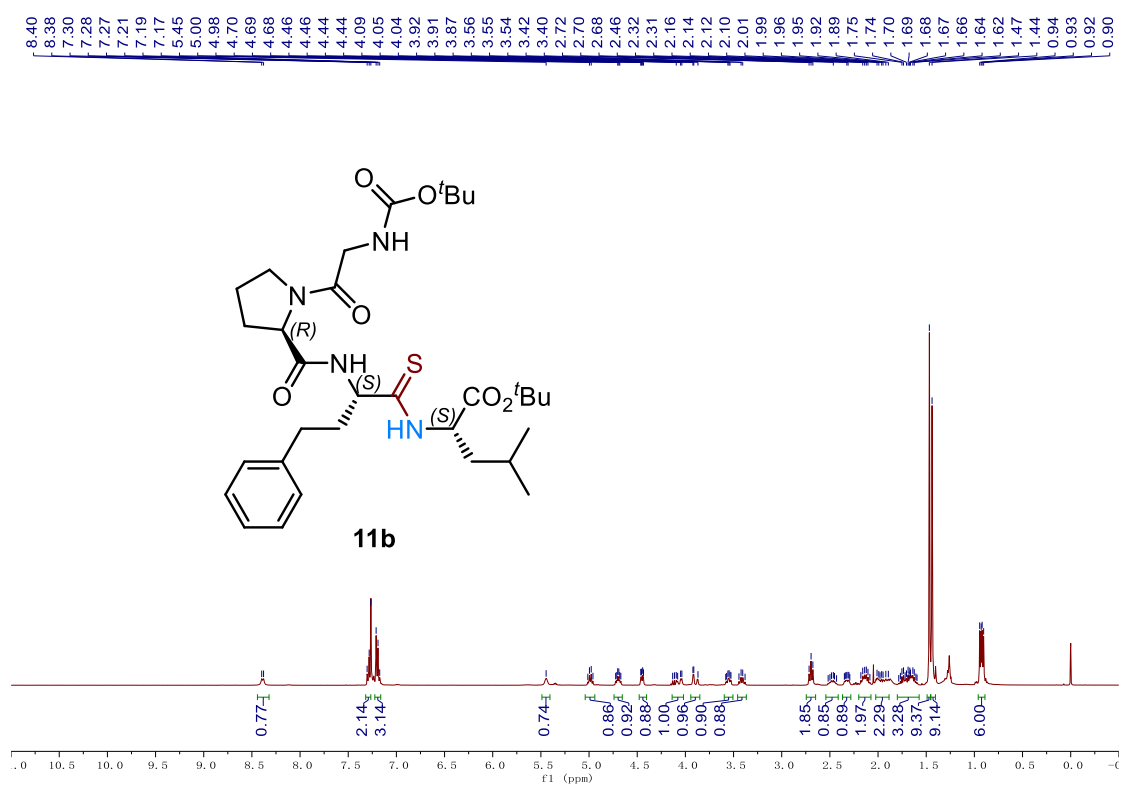

# SUPPORTING INFORMATION

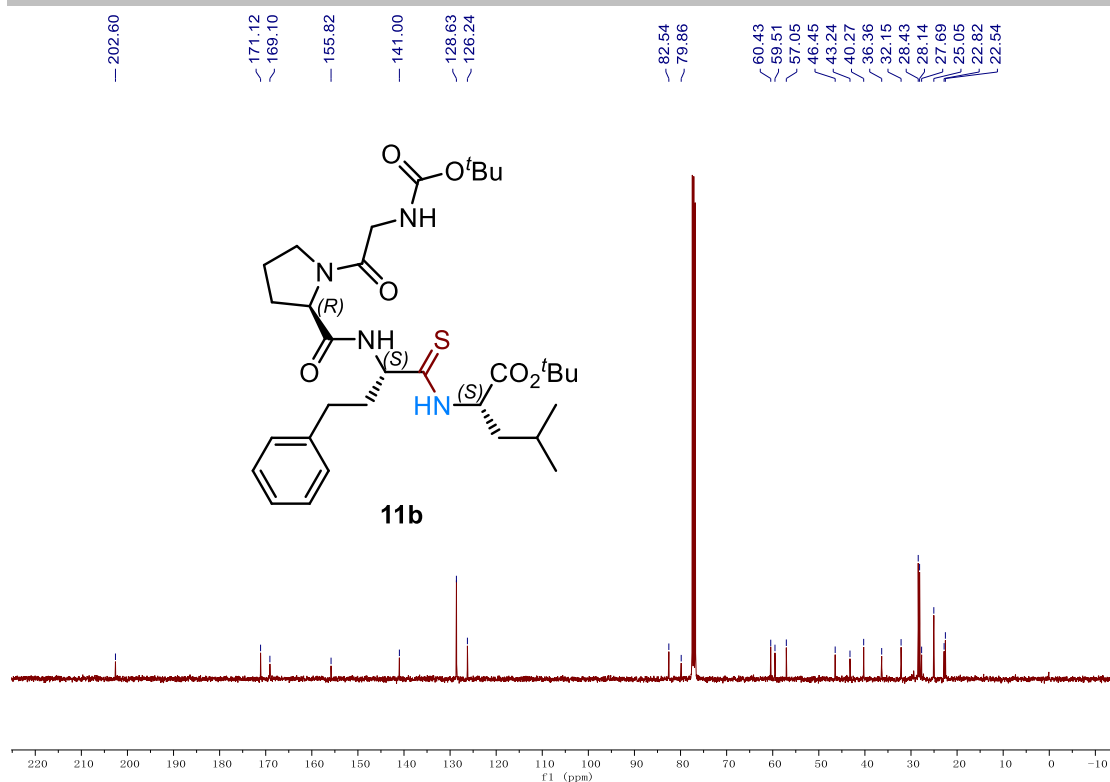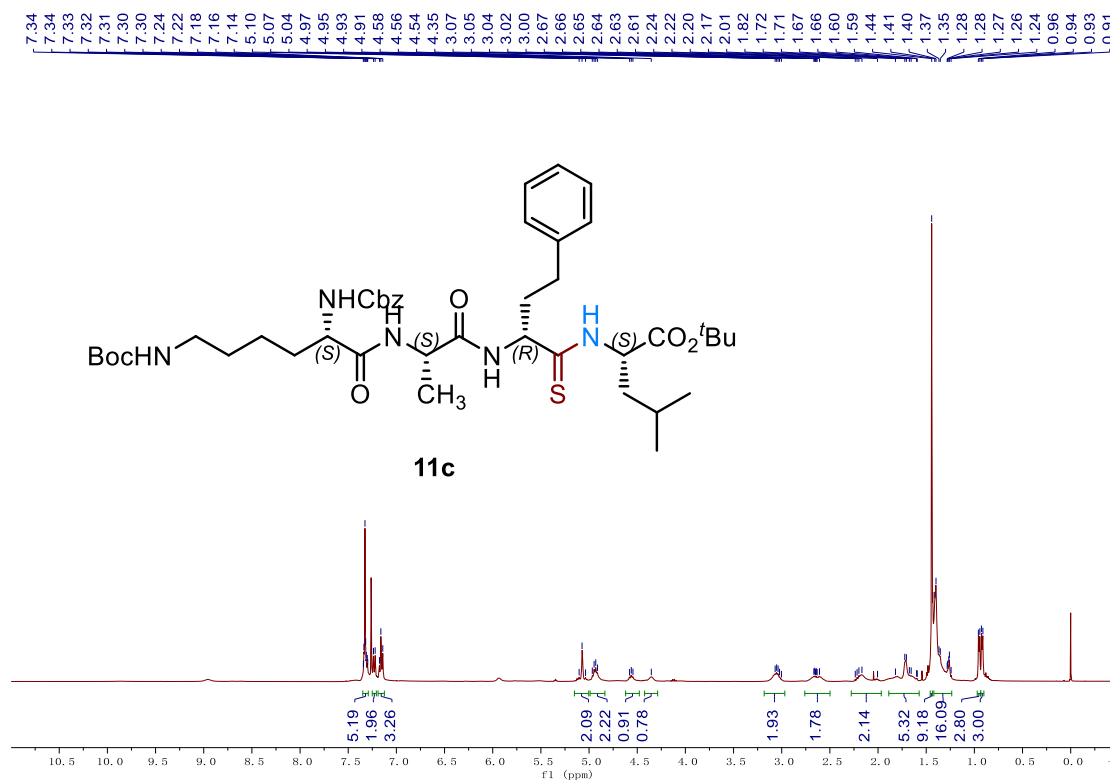

# SUPPORTING INFORMATION

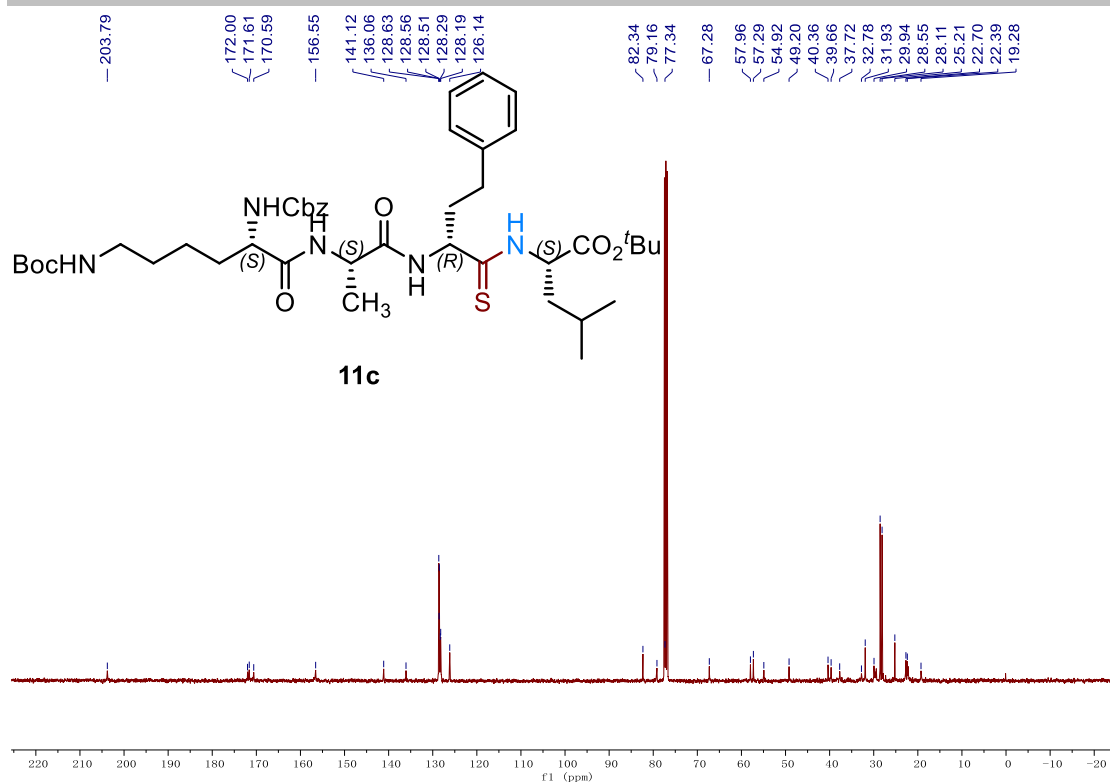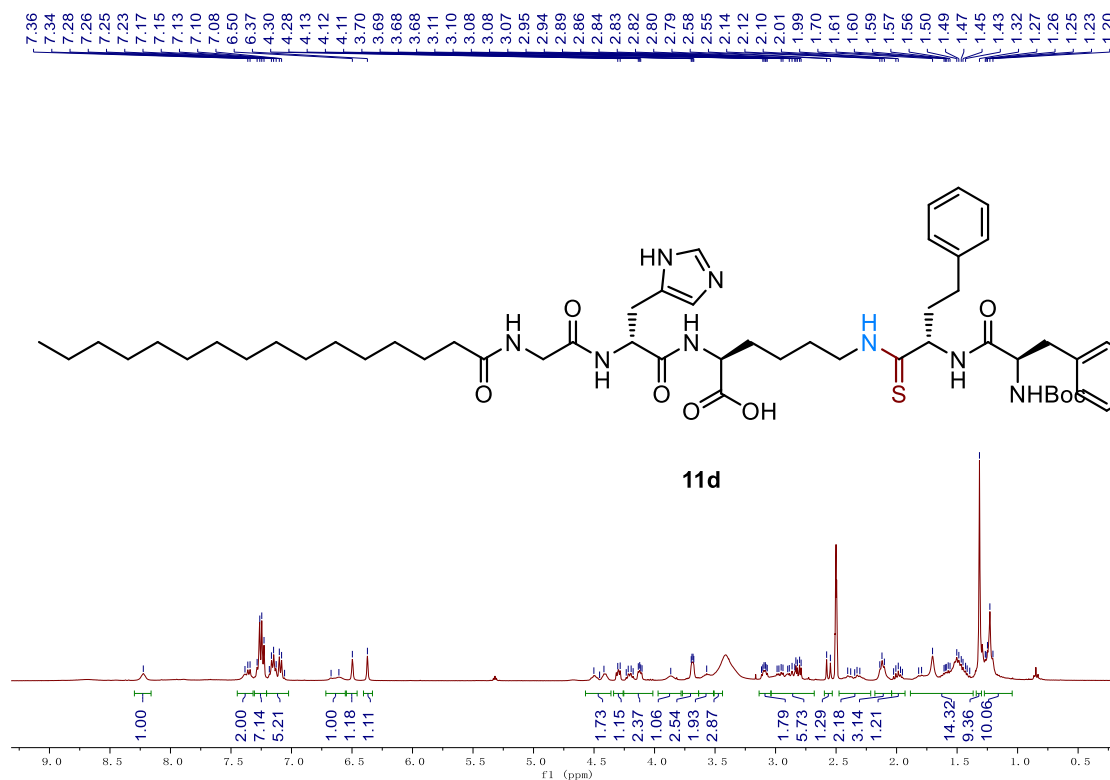

# SUPPORTING INFORMATION

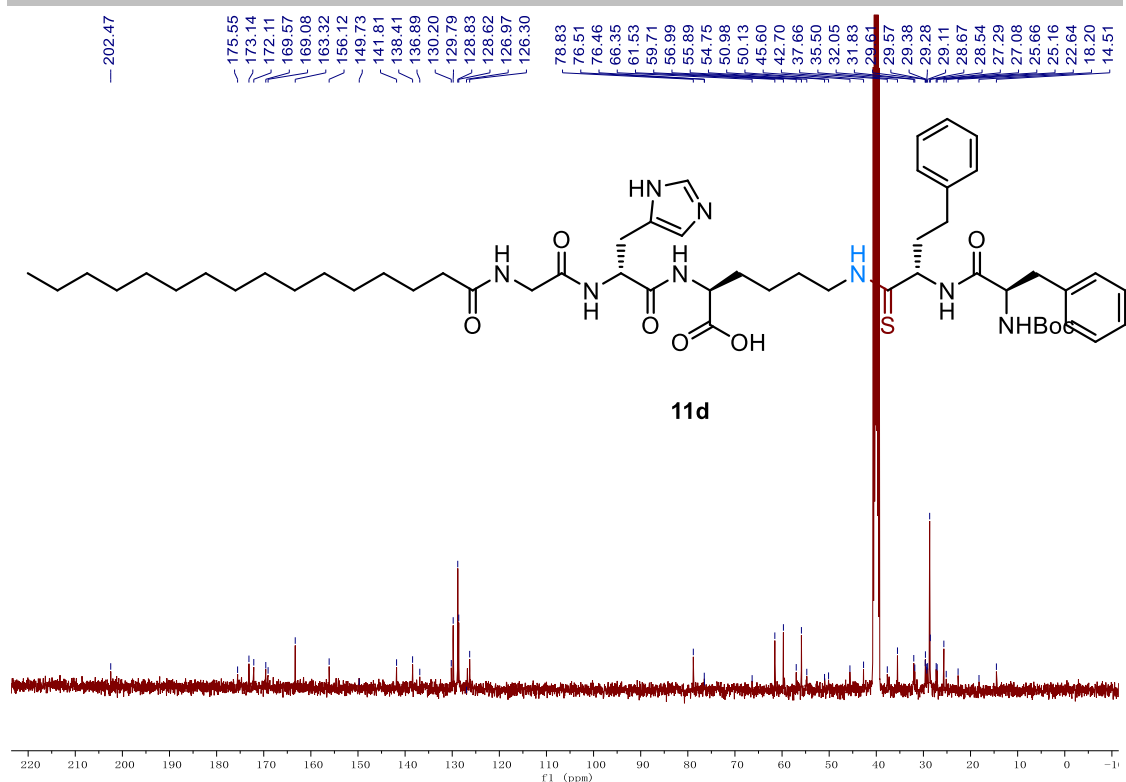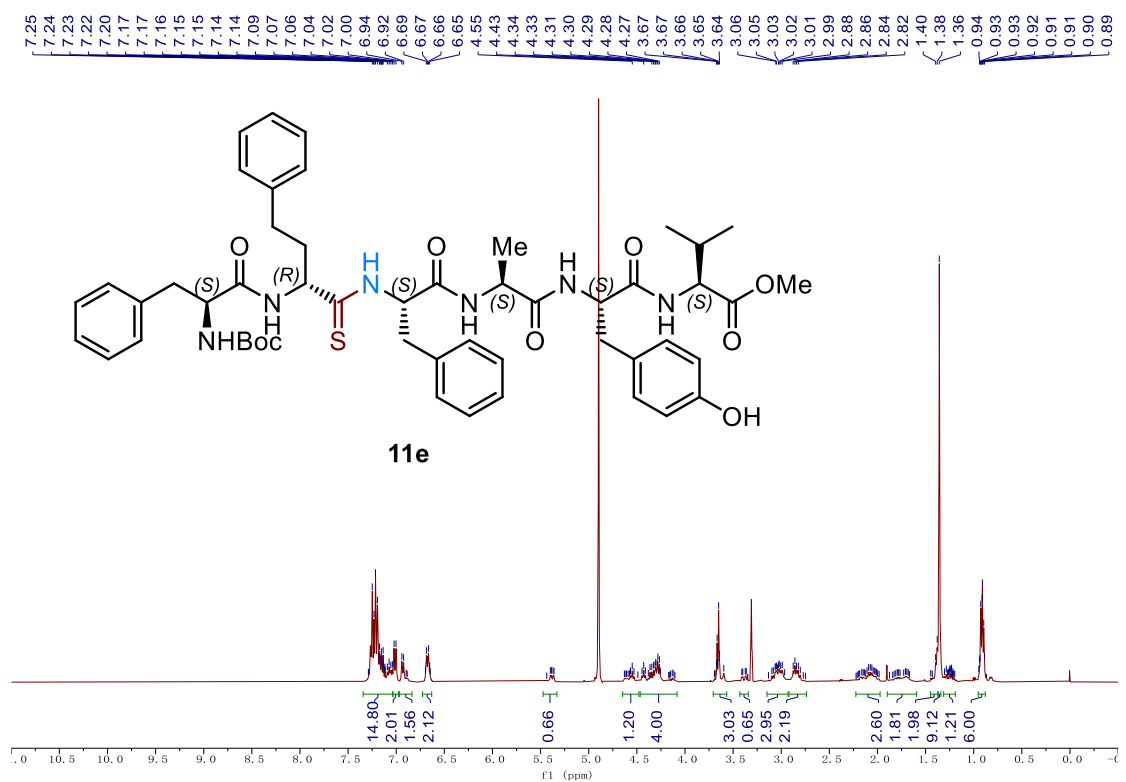



# SUPPORTING INFORMATION

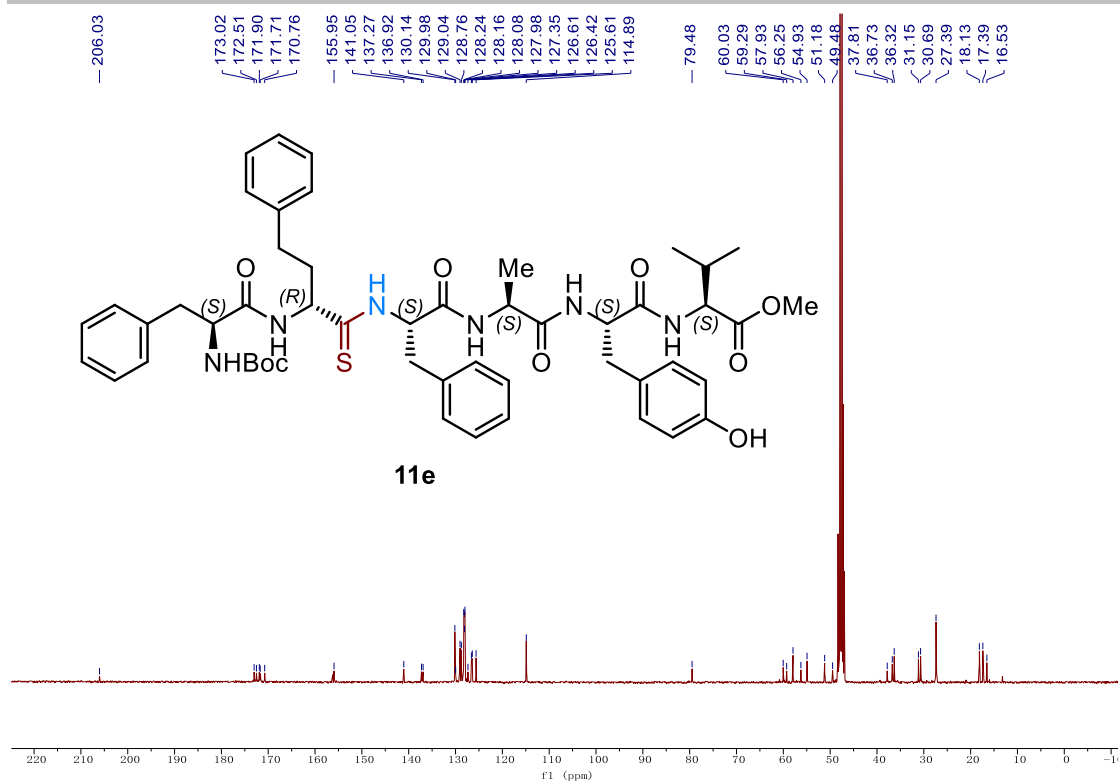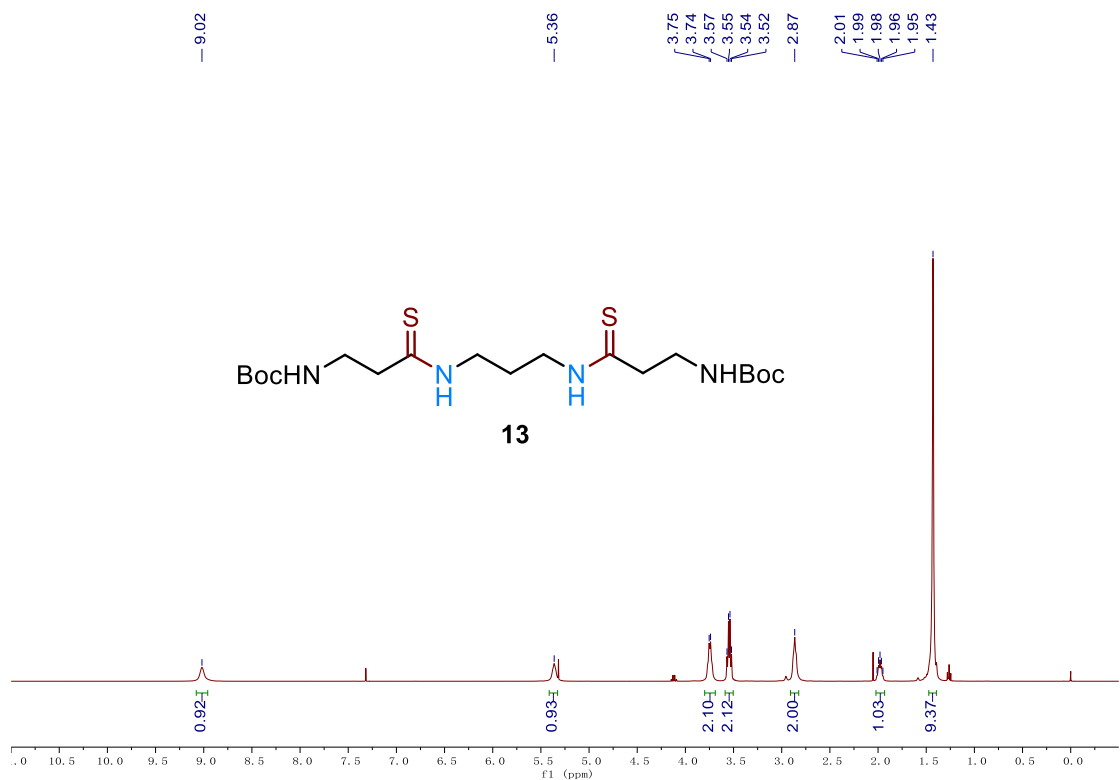

# SUPPORTING INFORMATION

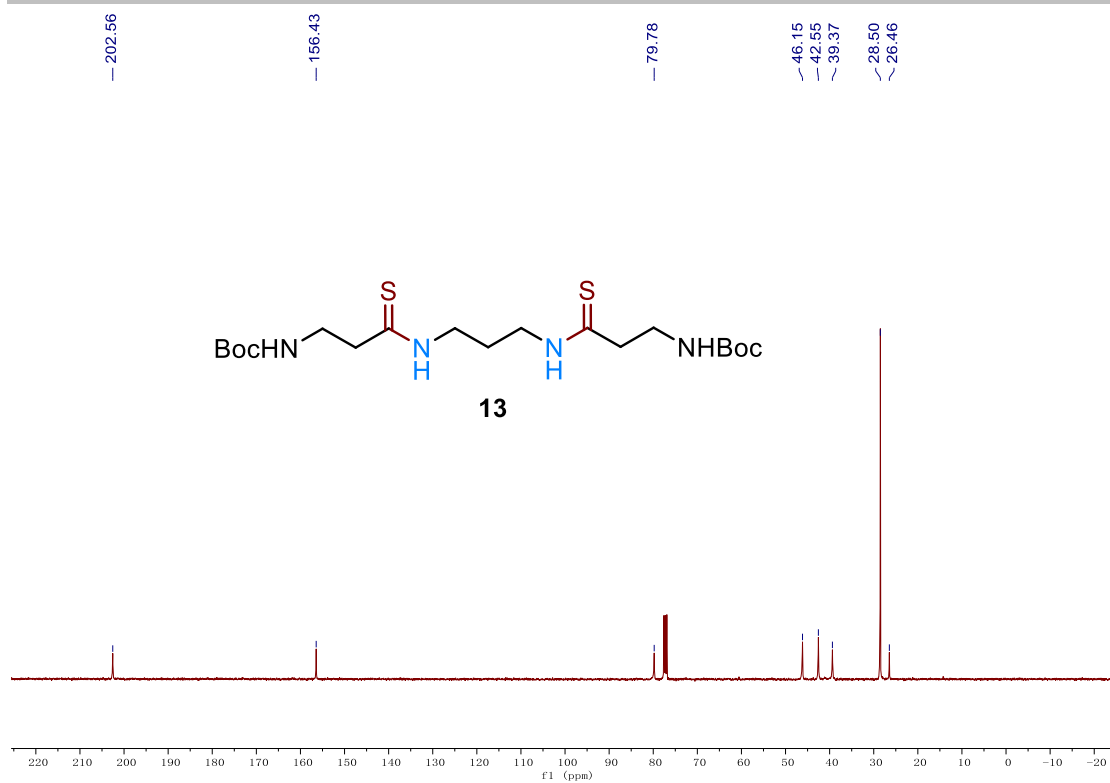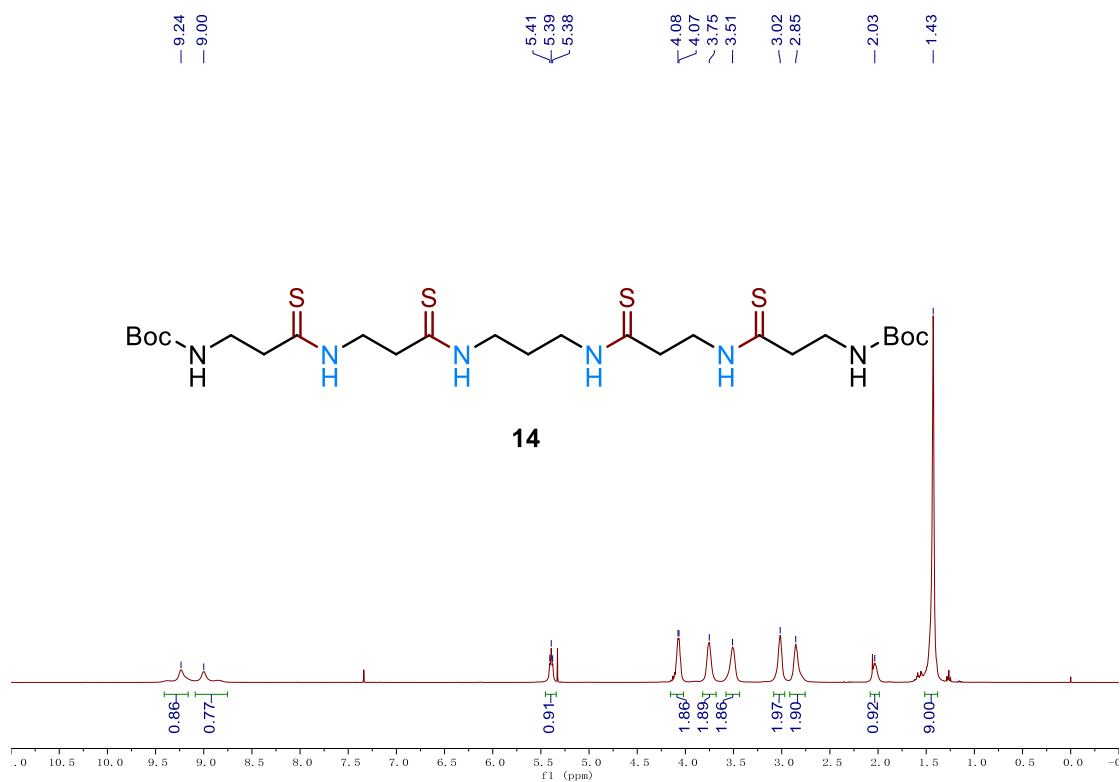

— 202.26

— 156.51

— 79.88

46.51  
44.70  
43.55  
42.86  
39.79  
28.54  
26.32

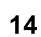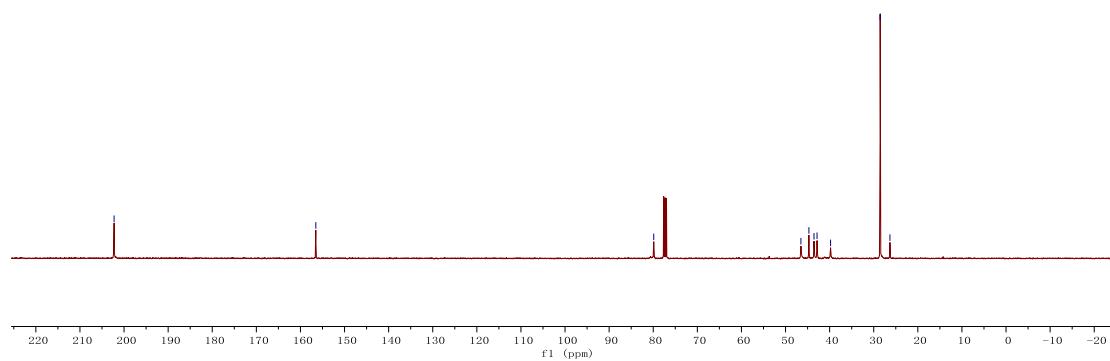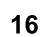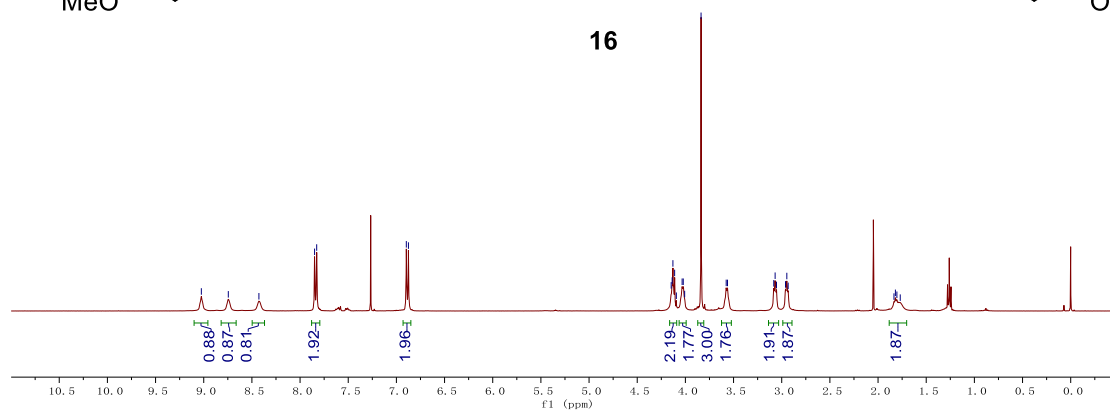

## SUPPORTING INFORMATION

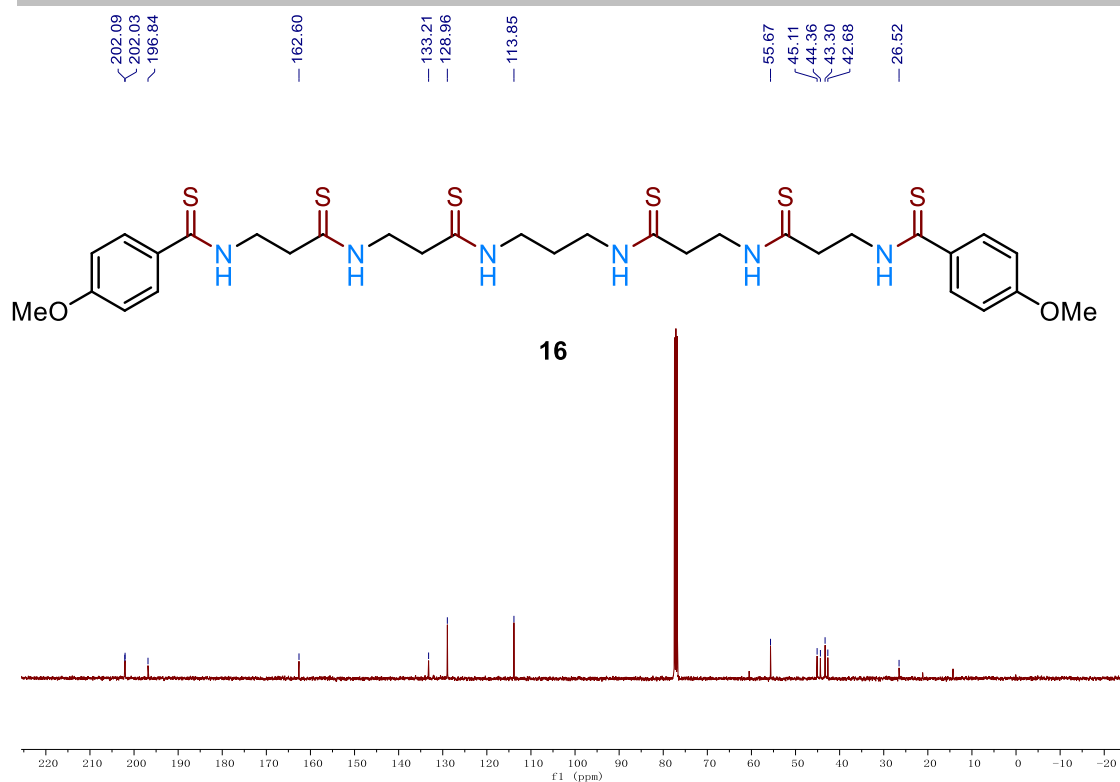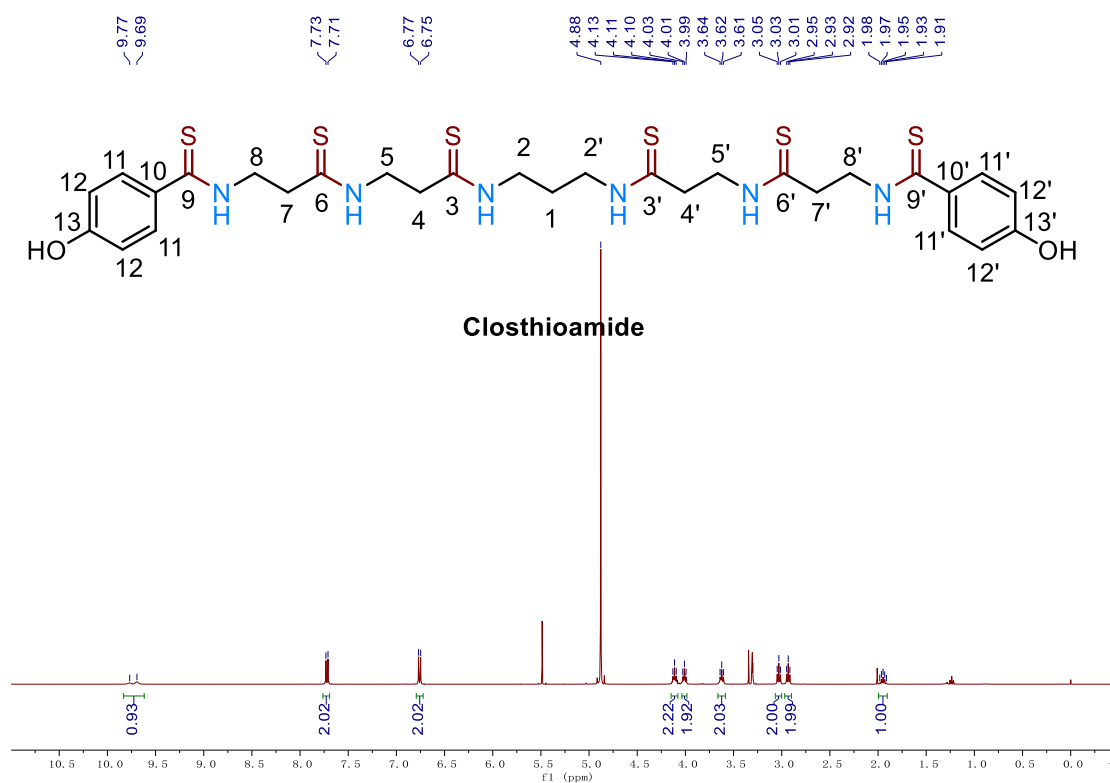

# SUPPORTING INFORMATION

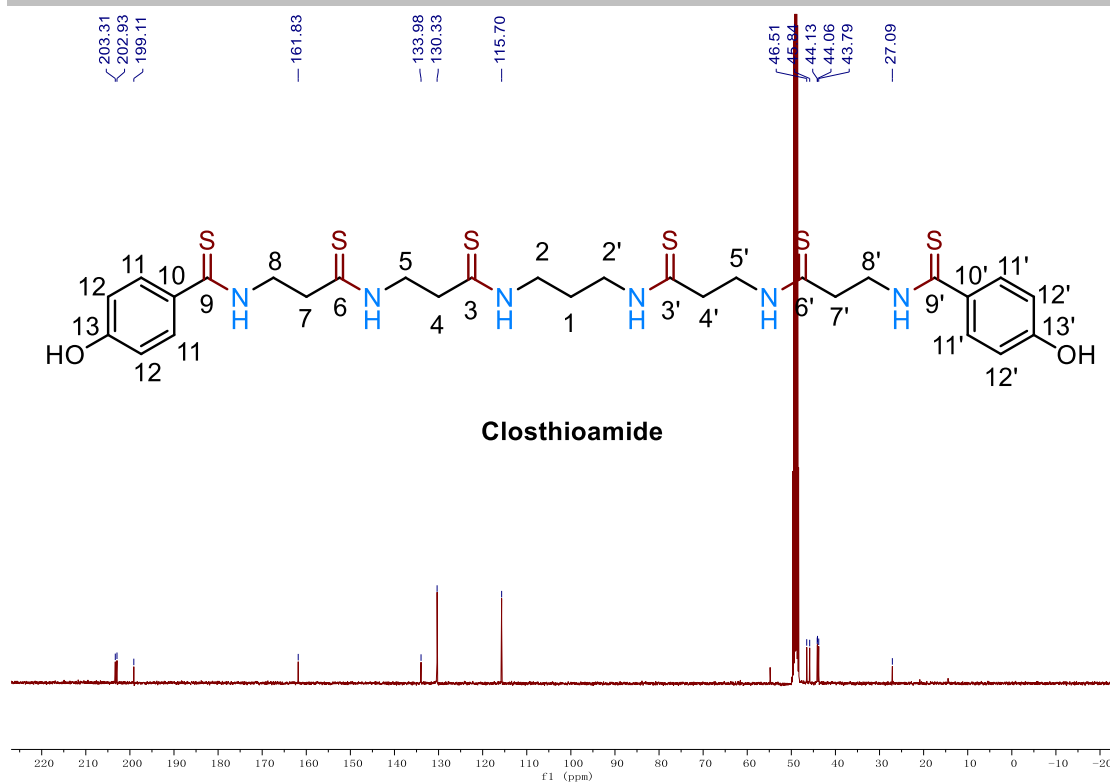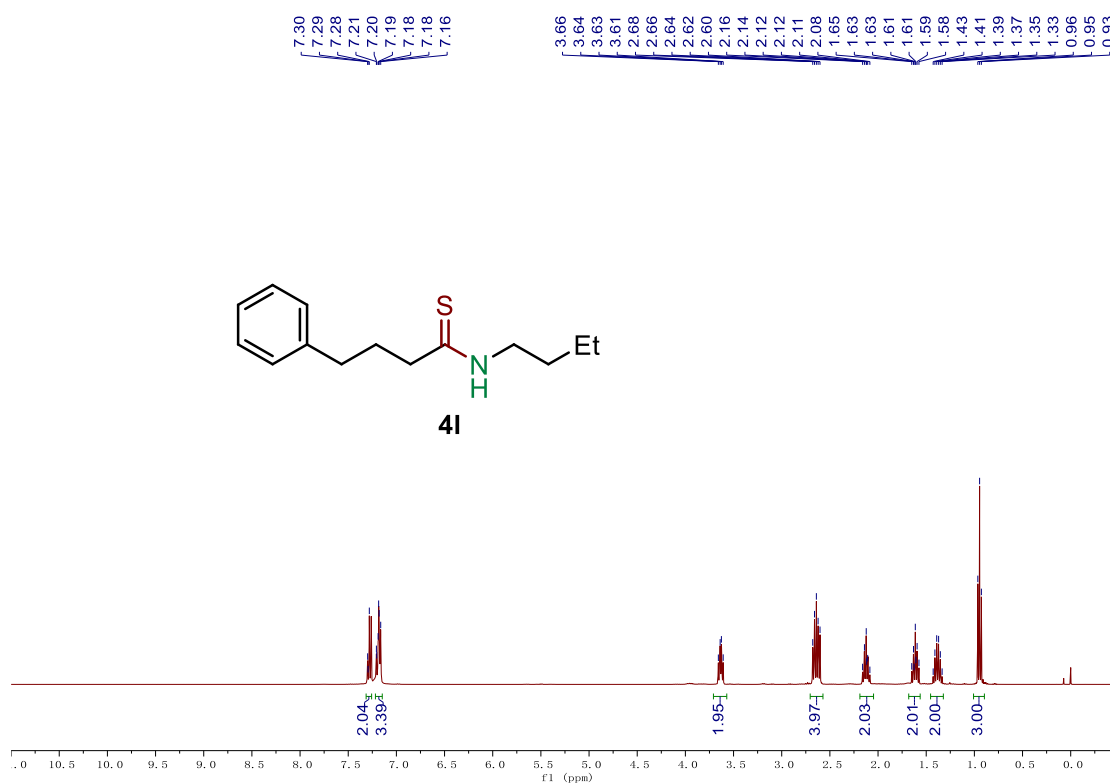

# SUPPORTING INFORMATION

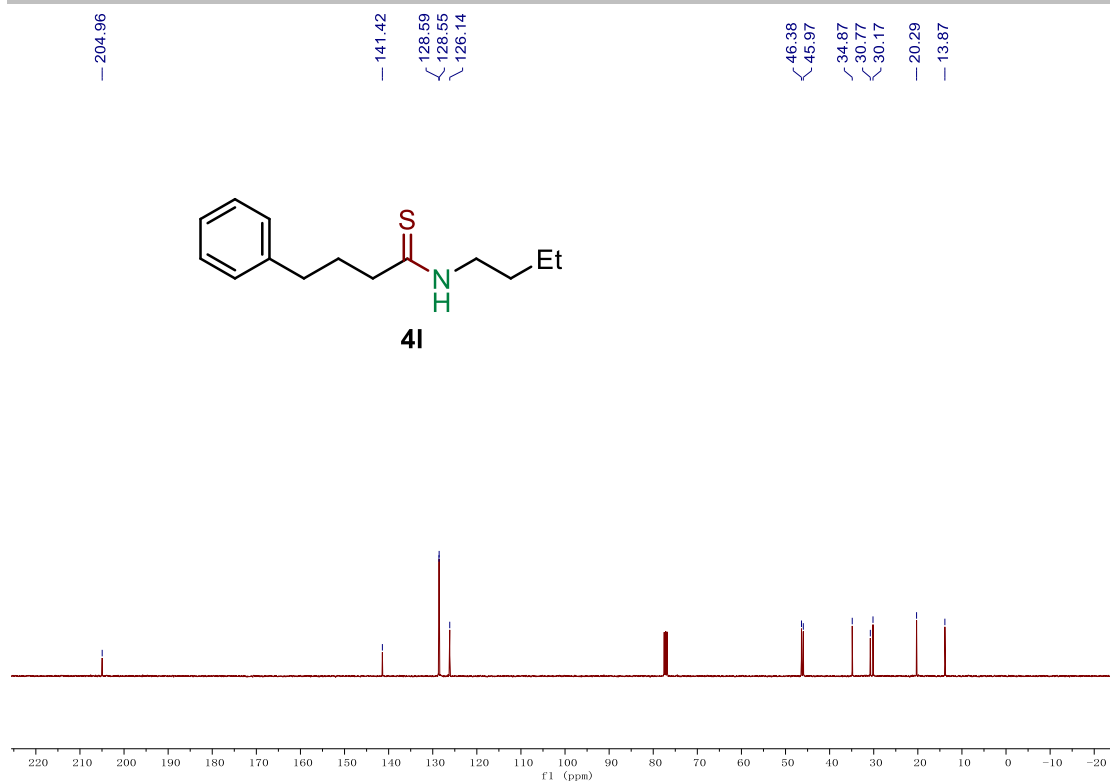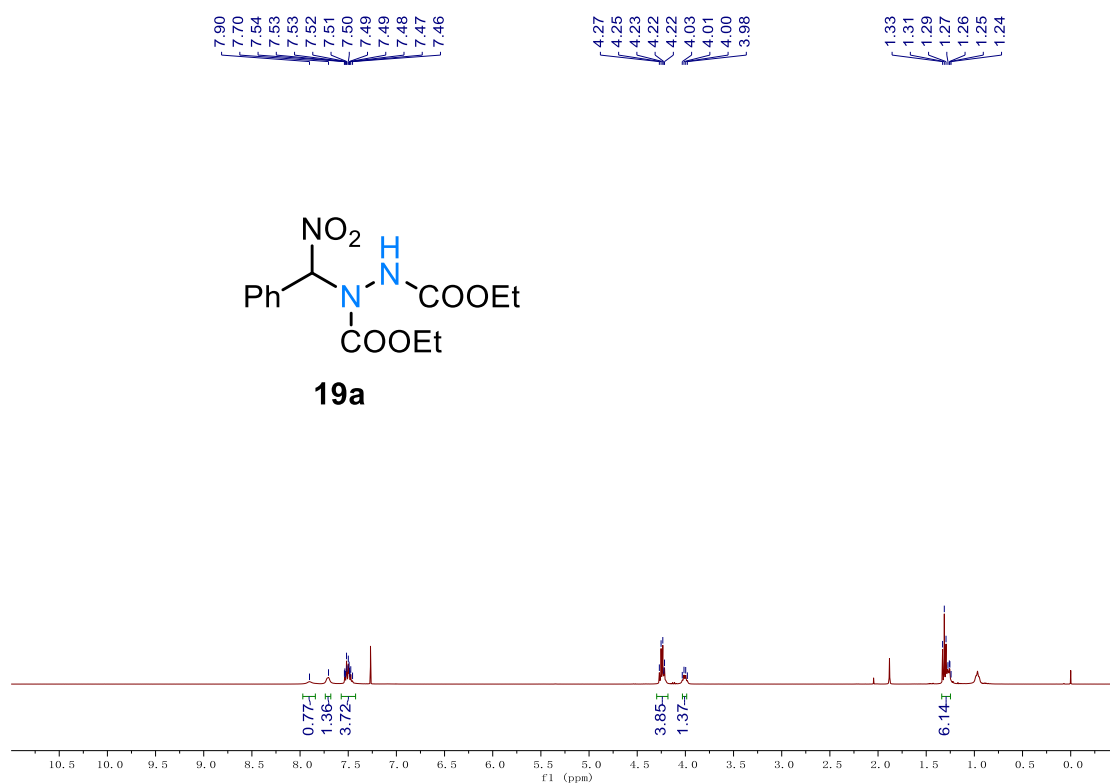

## SUPPORTING INFORMATION

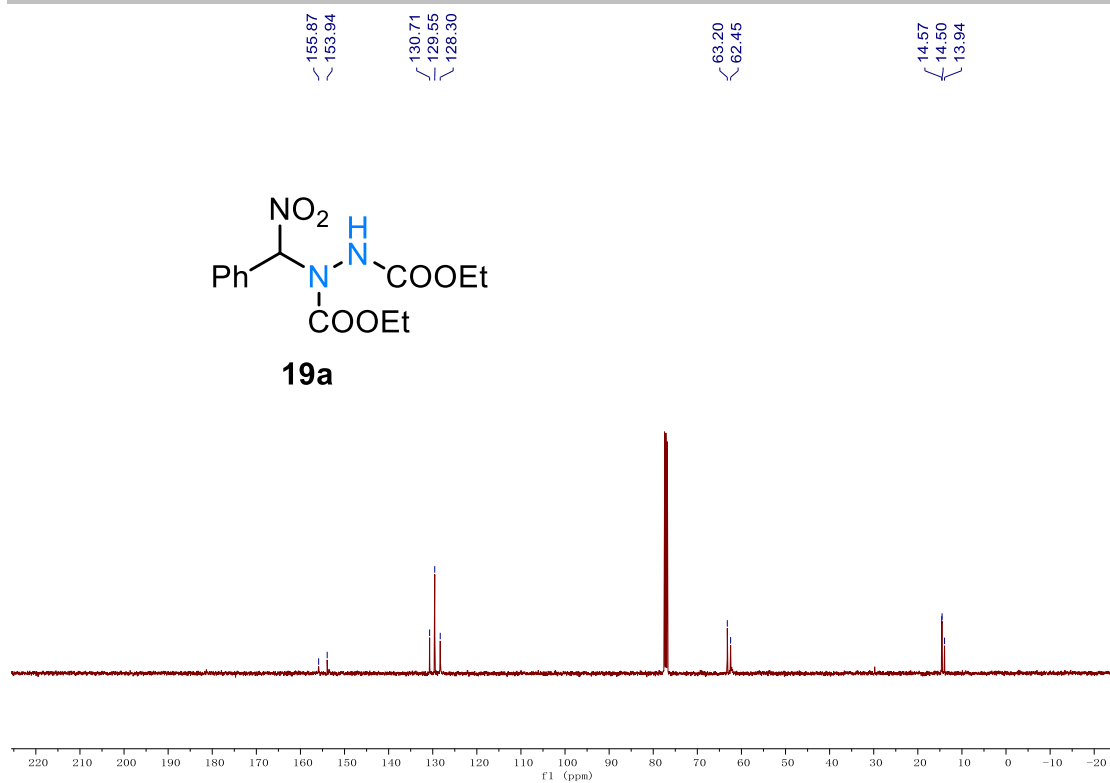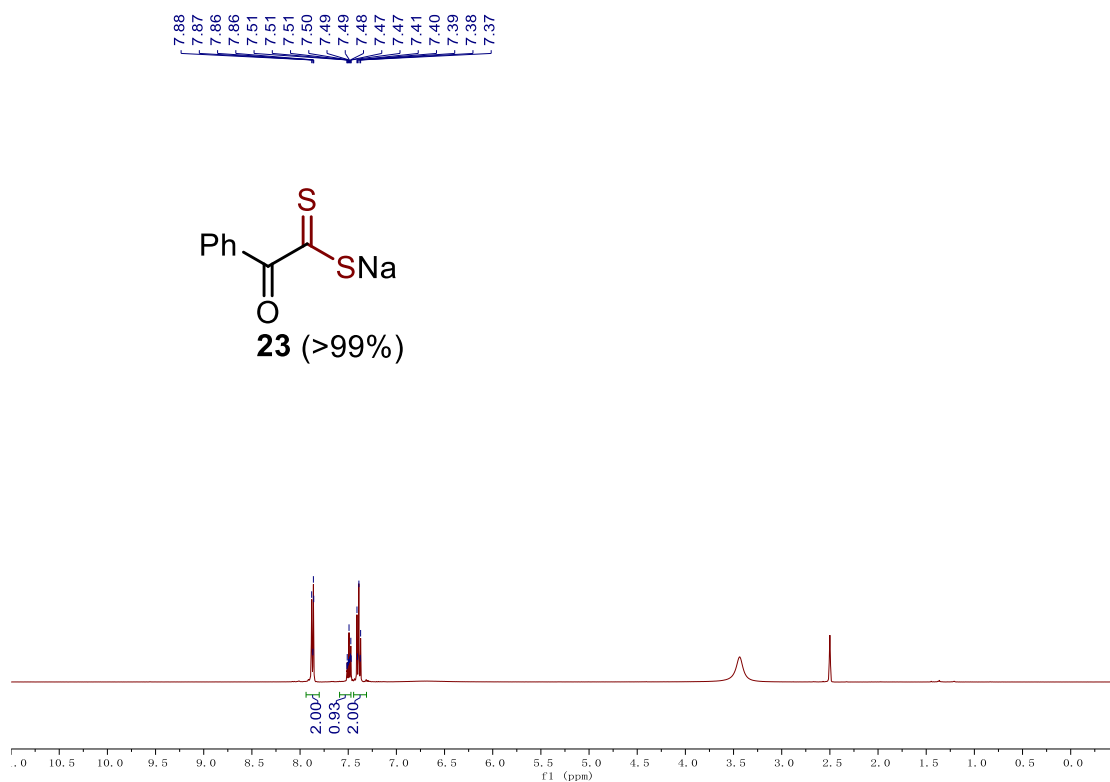

# SUPPORTING INFORMATION

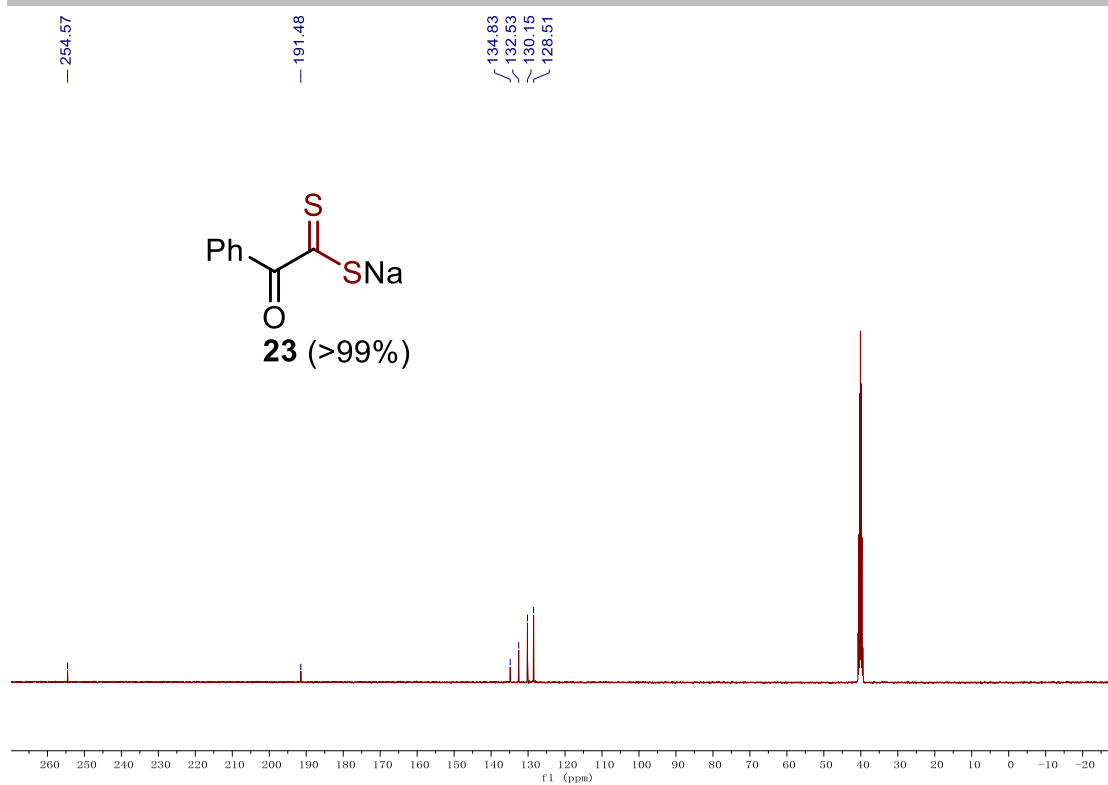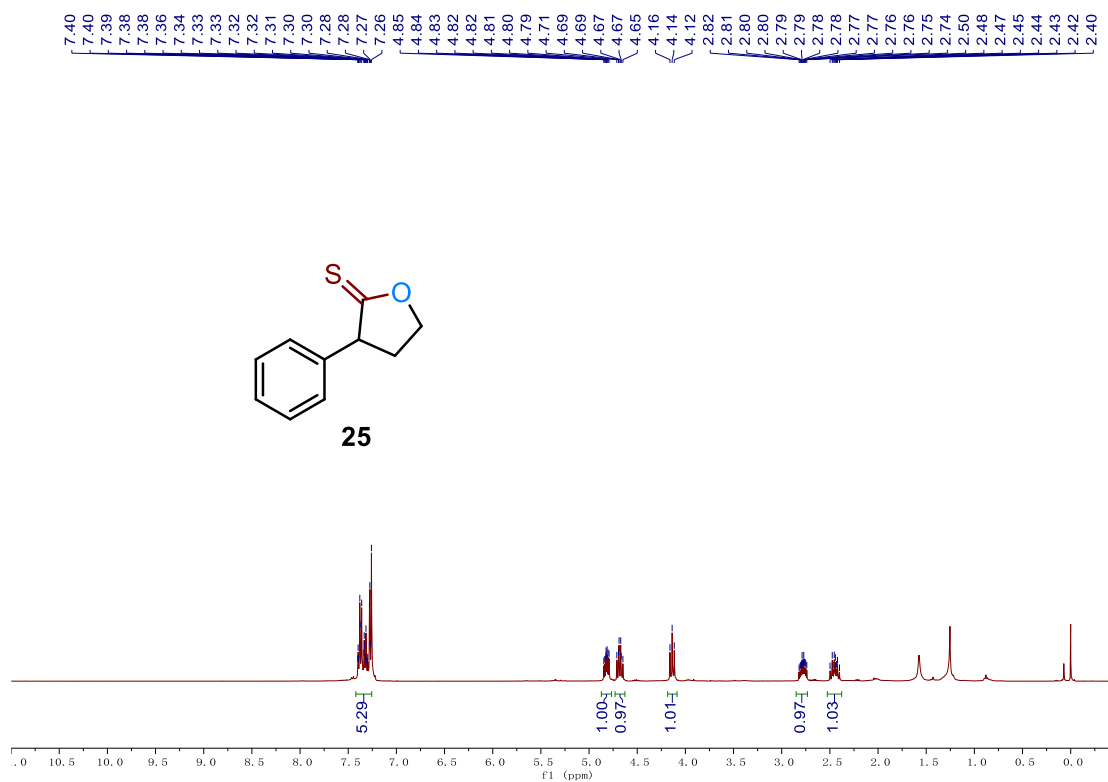



# SUPPORTING INFORMATION

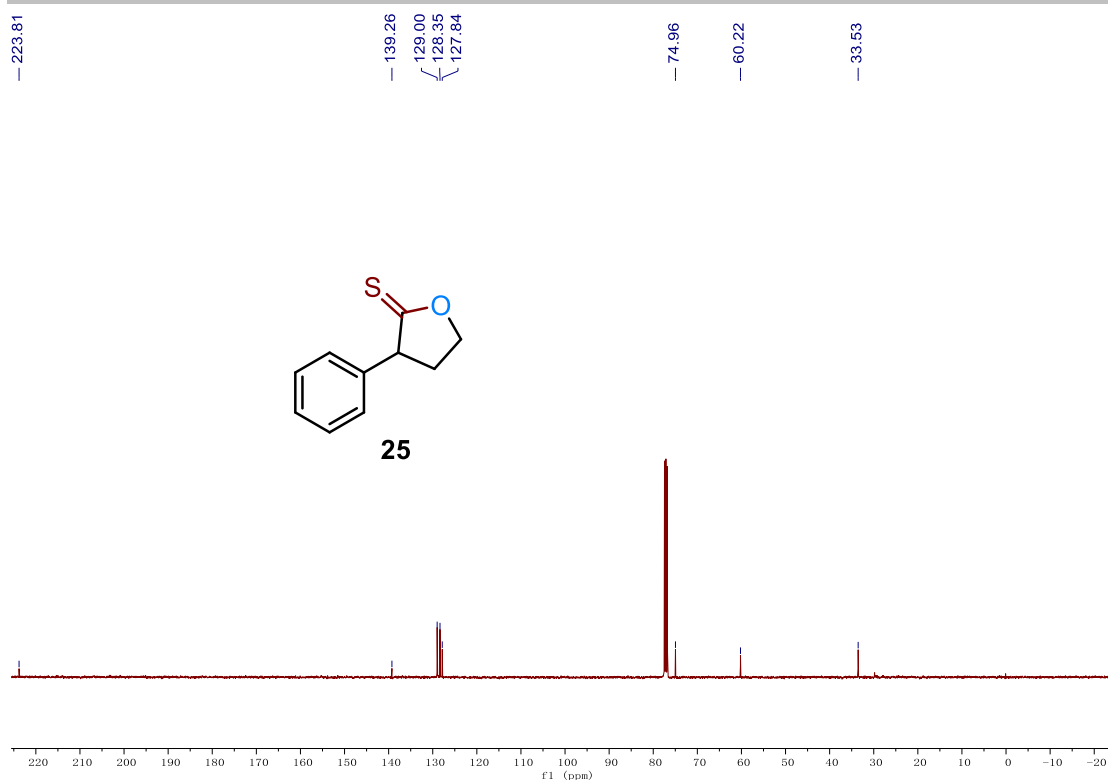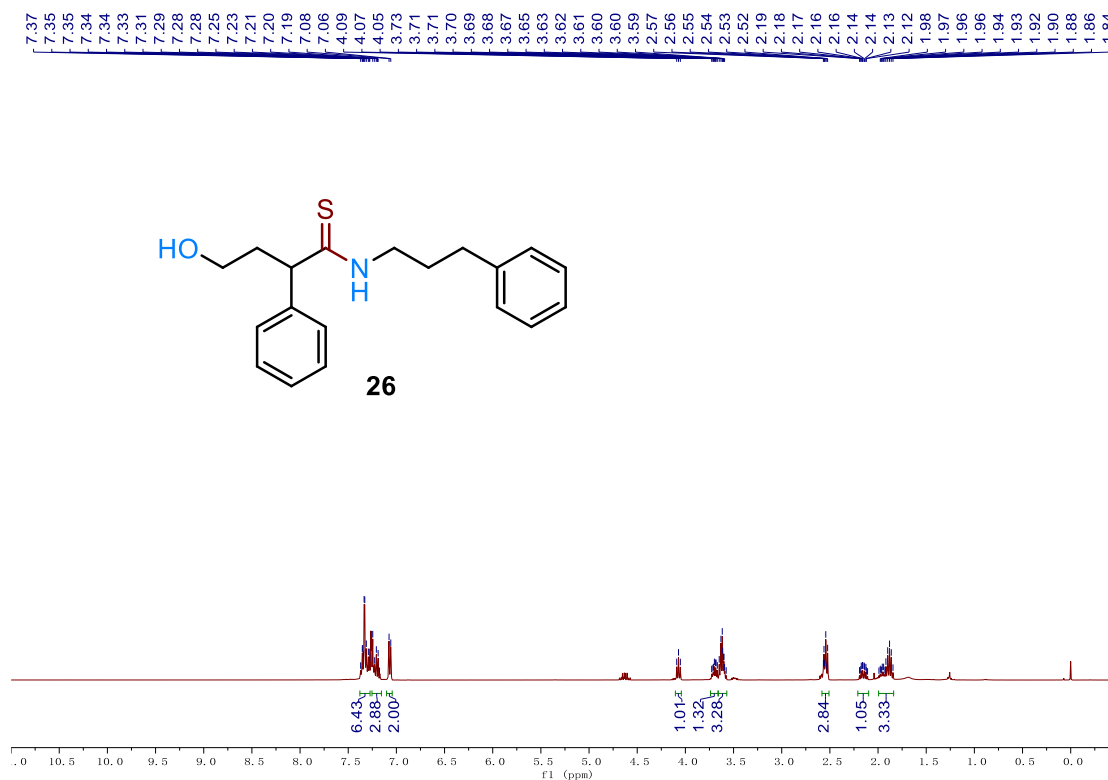

# SUPPORTING INFORMATION

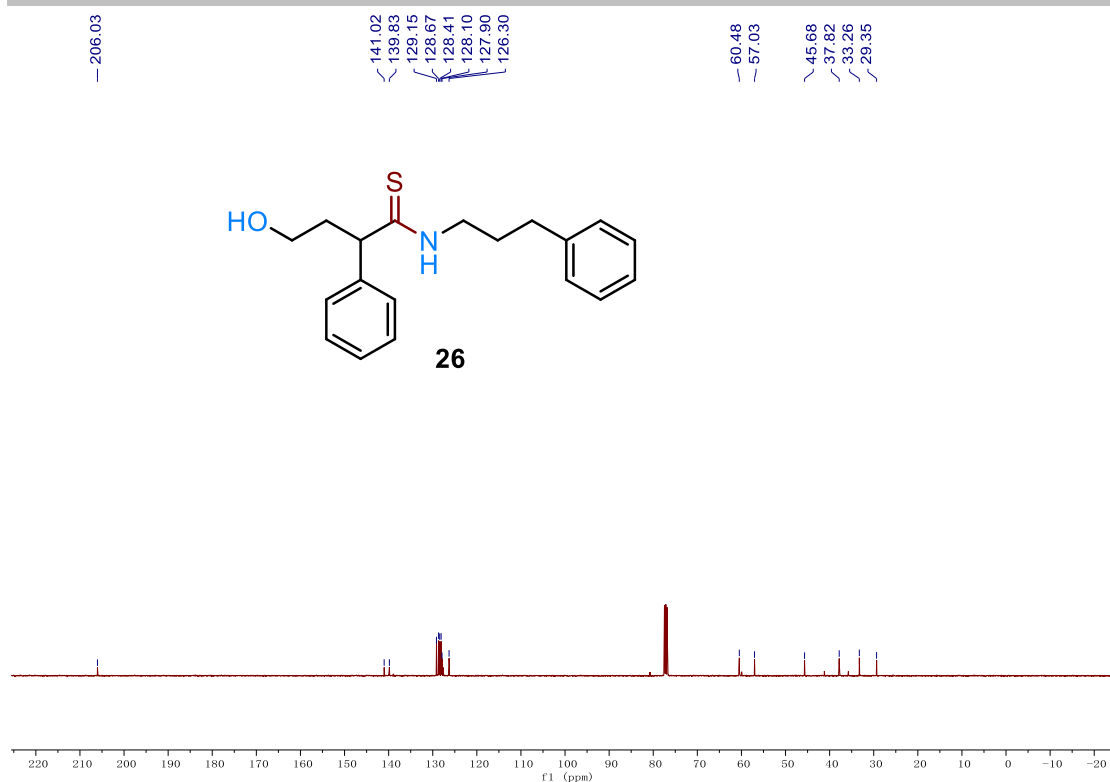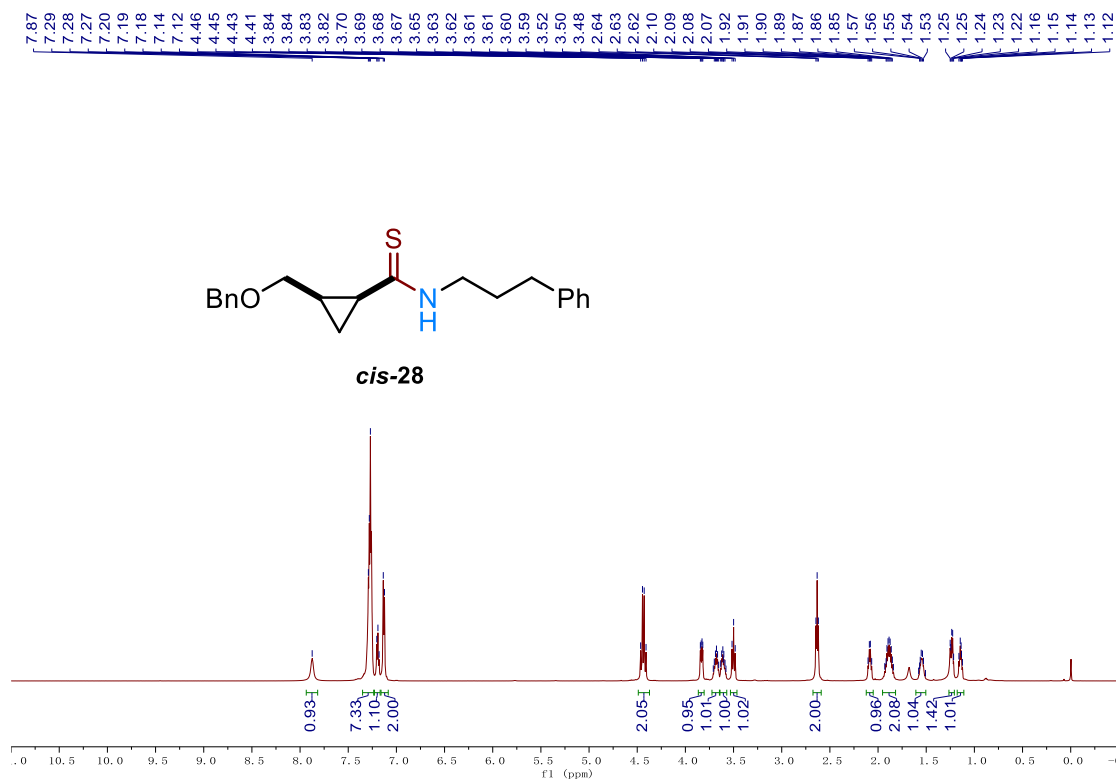

# SUPPORTING INFORMATION

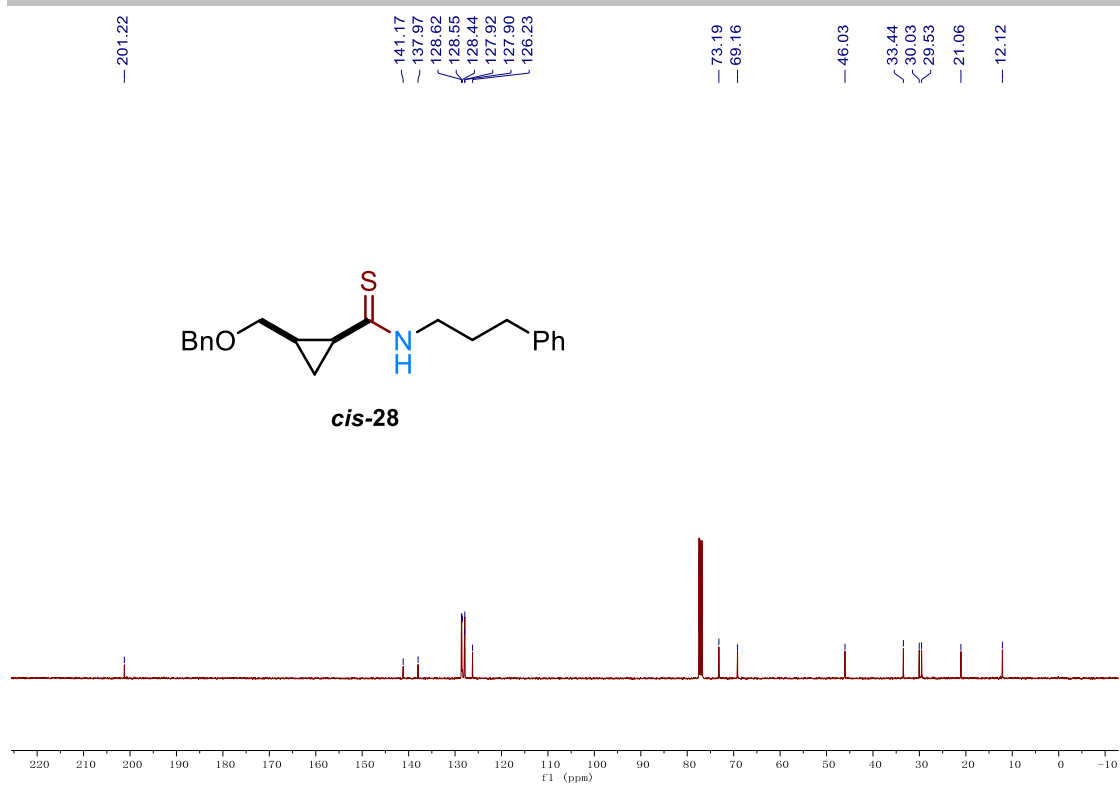

Supplement: Supplementary file 1 [file 5306c9846782fa644195e71a.pdf]
